# Supplementary material for: CDX2 expression in the hematopoietic lineage promotes leukemogenesis via TGFβ inhibition
Source: PubMed Central journal article supplement (PMC8410536; doi:10.1002/1878-0261.12982), 2021-06-26
Supplement: MOL2-15-2318-s003.pdf [file MOL2-15-2318-s003.pdf]

## Figure S1

Proportion of the predicted consequences of the recurrent mutational changes observed in *MxCDX2* mice.

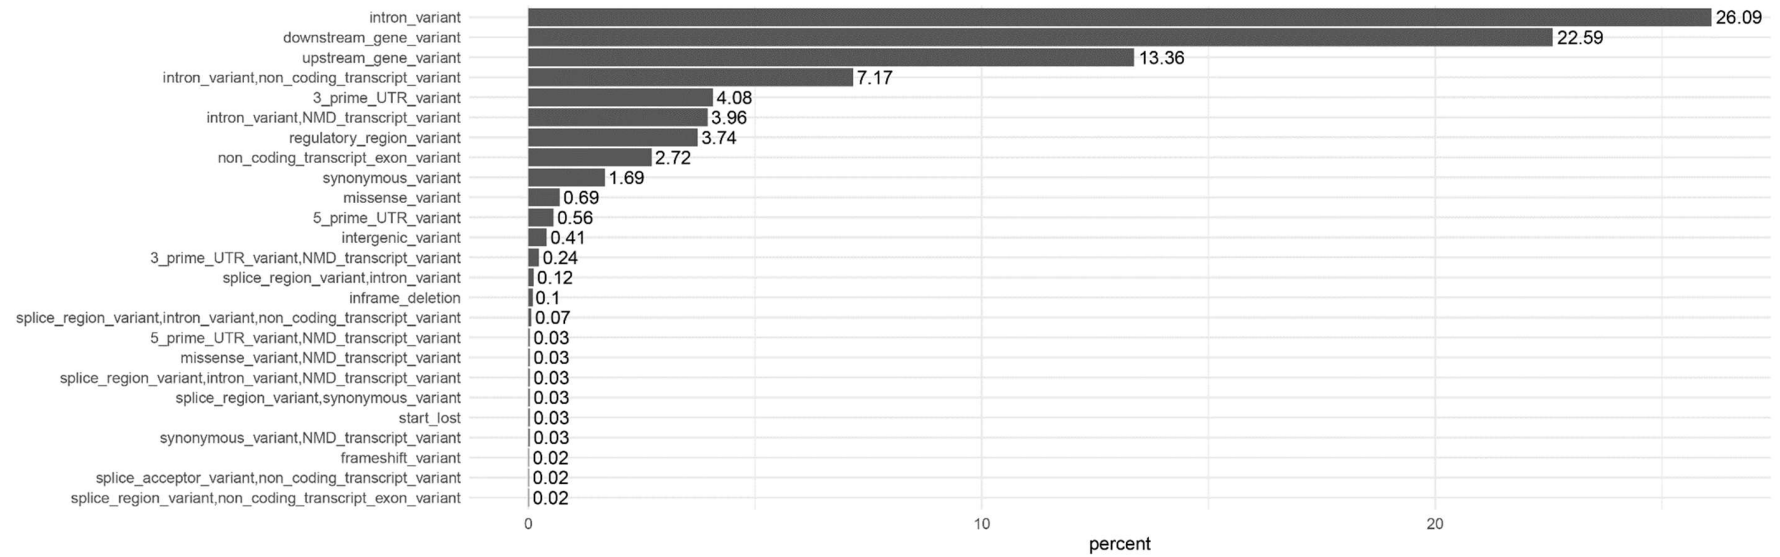

Data represented here are plotted from the column “Consequence” of the Supplementary Table S7.
