# Supplementary material for: CDX2 expression in the hematopoietic lineage promotes leukemogenesis via TGFβ inhibition
Source: PubMed Central journal article supplement (PMC8410536; doi:10.1002/1878-0261.12982), 2021-06-26
Supplement: MOL2-15-2318-s004.pdf [file MOL2-15-2318-s004.pdf]

**Table S6**

Prediction of the consequences of the nucleotide changes in *MxCDX2* mice

| Locus                 | Consequence                     | Impact   | Gene symbole | Gene Identifier    | Feature           | Feature identifier | Biotype                  | Mutation identifier |
|-----------------------|---------------------------------|----------|--------------|--------------------|-------------------|--------------------|--------------------------|---------------------|
| 1:138121809-138121810 | downstream gene variant         | MODIFIER | Ptprc        | ENSMUSG00000026395 | Transcript        | ENSMUST00000182138 | retained intron          | rs254298739         |
| 1:138121809-138121810 | intron variant                  | MODIFIER | Ptprc        | ENSMUSG00000026395 | Transcript        | ENSMUST00000182283 | protein coding           | rs254298739         |
| 1:138121809-138121810 | intron variant                  | MODIFIER | Ptprc        | ENSMUSG00000026395 | Transcript        | ENSMUST00000182755 | protein coding           | rs254298739         |
| 1:138121809-138121810 | downstream gene variant         | MODIFIER | Ptprc        | ENSMUSG00000026395 | Transcript        | ENSMUST00000183229 | retained intron          | rs254298739         |
| 1:138121809-138121810 | intron_variant,non_coding_trans | MODIFIER | Ptprc        | ENSMUSG00000026395 | Transcript        | ENSMUST00000183262 | retained_intron          | rs254298739         |
| 1:138121809-138121810 | intron_variant                  | MODIFIER | Ptprc        | ENSMUSG00000026395 | Transcript        | ENSMUST00000183301 | protein coding           | rs254298739         |
| 1:138121809-138121810 | upstream gene variant           | MODIFIER | Ptprc        | ENSMUSG00000026395 | Transcript        | ENSMUST00000187586 | retained intron          | rs254298739         |
| 1:138121809-138121810 | intron variant                  | MODIFIER | Ptprc        | ENSMUSG00000026395 | Transcript        | ENSMUST00000193650 | protein coding           | rs254298739         |
| 1:138121809-138121810 | intron variant                  | MODIFIER | Ptprc        | ENSMUSG00000026395 | Transcript        | ENSMUST00000195533 | protein coding           | rs254298739         |
| 1:170288954-170288954 | downstream gene variant         | MODIFIER | Sh2d1b1      | ENSMUSG00000102418 | Transcript        | ENSMUST00000179976 | protein coding           | -                   |
| 1:171701954-171701954 | intron_variant                  | MODIFIER | Cd48         | ENSMUSG00000015355 | Transcript        | ENSMUST00000015499 | protein coding           | rs864281451         |
| 1:171701954-171701954 | intron_variant                  | MODIFIER | Cd48         | ENSMUSG00000015355 | Transcript        | ENSMUST00000068584 | protein coding           | rs864281451         |
| 1:66708747-66708747   | intron_variant                  | MODIFIER | Rpe          | ENSMUSG00000026005 | Transcript        | ENSMUST00000027157 | protein coding           | rs32055350          |
| 1:66708747-66708747   | intron variant                  | MODIFIER | Rpe          | ENSMUSG00000026005 | Transcript        | ENSMUST00000113995 | protein coding           | rs32055350          |
| 1:66708747-66708747   | intron variant,NMD transcript v | MODIFIER | Rpe          | ENSMUSG00000026005 | Transcript        | ENSMUST00000142920 | nonsense mediated decay  | rs32055350          |
| 1:66708747-66708747   | intron variant,NMD transcript v | MODIFIER | Rpe          | ENSMUSG00000026005 | Transcript        | ENSMUST00000151016 | nonsense mediated decay  | rs32055350          |
| 1:66708747-66708747   | intron variant,NMD transcript v | MODIFIER | Rpe          | ENSMUSG00000026005 | Transcript        | ENSMUST00000190404 | nonsense mediated decay  | rs32055350          |
| 1:67002256-67002256   | 3_prime_UTR_variant             | MODIFIER | Lanc1        | ENSMUSG00000026000 | Transcript        | ENSMUST00000027149 | protein coding           | rs30339595          |
| 1:67002256-67002256   | 3_prime_UTR_variant             | MODIFIER | Lanc1        | ENSMUSG00000026000 | Transcript        | ENSMUST00000113979 | protein coding           | rs30339595          |
| 1:67002256-67002256   | downstream gene variant         | MODIFIER | Lanc1        | ENSMUSG00000026000 | Transcript        | ENSMUST00000119559 | protein coding           | rs30339595          |
| 1:67002256-67002256   | downstream gene variant         | MODIFIER | Lanc1        | ENSMUSG00000026000 | Transcript        | ENSMUST00000133508 | processed transcript     | rs30339595          |
| 1:67002256-67002256   | regulatory region variant       | MODIFIER | -            | -                  | RegulatoryFeature | ENSMUSR00000481899 | enhancer                 | rs30339595          |
| 1:91291262-91291262   | upstream gene variant           | MODIFIER | Gm7785       | ENSMUSG00000083064 | Transcript        | ENSMUST00000117121 | processed pseudogene     | rs50517452          |
| 1:91291262-91291262   | downstream_gene_variant         | MODIFIER | Ube2f        | ENSMUSG00000034343 | Transcript        | ENSMUST00000171165 | protein coding           | rs50517452          |
| 1:94038650-94038650   | 3_prime_UTR_variant             | MODIFIER | Pdcd1        | ENSMUSG00000026285 | Transcript        | ENSMUST00000027507 | protein coding           | rs246171206         |
| 1:99190350-99190350   | intergenic_variant              | MODIFIER | -            | -                  | -                 | -                  | -                        | -                   |
| 1:99790318-99790318   | intron variant                  | MODIFIER | Cntnap5b     | ENSMUSG00000067028 | Transcript        | ENSMUST00000086738 | protein coding           | rs48936094          |
| 1:99790318-99790318   | downstream gene variant         | MODIFIER | Tdpx-ps1     | ENSMUSG00000082431 | Transcript        | ENSMUST00000117372 | processed pseudogene     | rs48936094          |
| 1:99790342-99790342   | intron variant                  | MODIFIER | Cntnap5b     | ENSMUSG00000067028 | Transcript        | ENSMUST00000086738 | protein coding           | -                   |
| 1:99790342-99790342   | downstream gene variant         | MODIFIER | Tdpx-ps1     | ENSMUSG00000082431 | Transcript        | ENSMUST00000117372 | processed pseudogene     | -                   |
| 1:33583113-33583113   | intron_variant                  | MODIFIER | Prim2        | ENSMUSG00000026134 | Transcript        | ENSMUST00000027312 | protein coding           | rs32088204          |
| 1:33583113-33583113   | intron_variant,non_coding_trans | MODIFIER | Prim2        | ENSMUSG00000026134 | Transcript        | ENSMUST00000189552 | retained_intron          | rs32088204          |
| 1:37443158-37443158   | downstream gene variant         | MODIFIER | Unc50        | ENSMUSG00000026111 | Transcript        | ENSMUST00000027285 | protein coding           | -                   |
| 1:37443158-37443158   | 3 prime UTR variant             | MODIFIER | Mgat4a       | ENSMUSG00000026110 | Transcript        | ENSMUST00000042161 | protein coding           | -                   |
| 1:37443158-37443158   | downstream gene variant         | MODIFIER | Unc50        | ENSMUSG00000026111 | Transcript        | ENSMUST00000114925 | protein coding           | -                   |
| 1:37443158-37443158   | downstream gene variant         | MODIFIER | Unc50        | ENSMUSG00000026111 | Transcript        | ENSMUST00000118059 | protein coding           | -                   |
| 1:37443158-37443158   | downstream_gene_variant         | MODIFIER | Mgat4a       | ENSMUSG00000026110 | Transcript        | ENSMUST00000143636 | protein coding           | -                   |
| 1:37443158-37443158   | 3_prime_UTR_variant             | MODIFIER | Mgat4a       | ENSMUSG00000026110 | Transcript        | ENSMUST00000151952 | protein coding           | -                   |
| 1:37443158-37443158   | downstream_gene_variant         | MODIFIER | Mgat4a       | ENSMUSG00000026110 | Transcript        | ENSMUST00000154819 | protein coding           | -                   |
| 1:43050804-43050804   | intron variant                  | MODIFIER | Tqfbrap1     | ENSMUSG00000070939 | Transcript        | ENSMUST00000095014 | protein coding           | rs48773819          |
| 1:43050804-43050804   | intron variant                  | MODIFIER | Tqfbrap1     | ENSMUSG00000070939 | Transcript        | ENSMUST00000186694 | protein coding           | rs48773819          |
| 1:43050804-43050804   | downstream gene variant         | MODIFIER | Tqfbrap1     | ENSMUSG00000070939 | Transcript        | ENSMUST00000188598 | retained intron          | rs48773819          |
| 2:110462591-110462591 | intergenic_variant              | MODIFIER | -            | -                  | -                 | -                  | -                        | -                   |
| 2:121543632-121543632 | downstream_gene_variant         | MODIFIER | Wdr76        | ENSMUSG00000027242 | Transcript        | ENSMUST00000028676 | protein coding           | -                   |
| 2:121543632-121543632 | downstream_gene_variant         | MODIFIER | Frmf5        | ENSMUSG00000027238 | Transcript        | ENSMUST00000110592 | protein coding           | -                   |
| 2:121543632-121543632 | downstream gene variant         | MODIFIER | Frmf5        | ENSMUSG00000027238 | Transcript        | ENSMUST00000110593 | protein coding           | -                   |
| 2:121543632-121543632 | 3 prime UTR variant             | MODIFIER | Wdr76        | ENSMUSG00000027242 | Transcript        | ENSMUST00000110602 | protein coding           | -                   |
| 2:121543632-121543632 | downstream gene variant         | MODIFIER | Wdr76        | ENSMUSG00000027242 | Transcript        | ENSMUST00000110603 | protein coding           | -                   |
| 2:121543632-121543632 | downstream gene variant         | MODIFIER | Frmf5        | ENSMUSG00000027238 | Transcript        | ENSMUST00000121219 | protein coding           | -                   |
| 2:121543632-121543632 | downstream_gene_variant         | MODIFIER | Frmf5        | ENSMUSG00000027238 | Transcript        | ENSMUST00000128428 | nonsense mediated decay  | -                   |
| 2:121543632-121543632 | downstream_gene_variant         | MODIFIER | Frmf5        | ENSMUSG00000027238 | Transcript        | ENSMUST00000131092 | protein coding           | -                   |
| 2:121543632-121543632 | downstream_gene_variant         | MODIFIER | Frmf5        | ENSMUSG00000027238 | Transcript        | ENSMUST00000133898 | protein coding           | -                   |
| 2:121543632-121543632 | downstream gene variant         | MODIFIER | Frmf5        | ENSMUSG00000027238 | Transcript        | ENSMUST00000138157 | protein coding           | -                   |
| 2:121543632-121543632 | downstream gene variant         | MODIFIER | Frmf5        | ENSMUSG00000027238 | Transcript        | ENSMUST00000155570 | protein coding           | -                   |
| 2:121543632-121543632 | downstream gene variant         | MODIFIER | Frmf5        | ENSMUSG00000027238 | Transcript        | ENSMUST00000212518 | protein coding           | -                   |
| 2:155283614-155283614 | intron variant                  | MODIFIER | Pigu         | ENSMUSG00000038383 | Transcript        | ENSMUST00000077626 | protein coding           | rs27310833          |
| 2:155283614-155283614 | intron_variant,non_coding_trans | MODIFIER | Pigu         | ENSMUSG00000038383 | Transcript        | ENSMUST00000139854 | processed transcript     | rs27310833          |
| 2:155283614-155283614 | intron_variant                  | MODIFIER | Pigu         | ENSMUSG00000038383 | Transcript        | ENSMUST00000165234 | protein coding           | rs27310833          |
| 2:155283614-155283614 | regulatory region variant       | MODIFIER | -            | -                  | RegulatoryFeature | ENSMUSR00000166044 | promoter flanking region | rs27310833          |
| 2:155291037-155291037 | intron variant                  | MODIFIER | Pigu         | ENSMUSG00000038383 | Transcript        | ENSMUST00000077626 | protein coding           | rs47443090          |
| 2:155291037-155291037 | intron variant,non coding trans | MODIFIER | Pigu         | ENSMUSG00000038383 | Transcript        | ENSMUST00000139854 | processed transcript     | rs47443090          |
| 2:155291037-155291037 | intron variant                  | MODIFIER | Pigu         | ENSMUSG00000038383 | Transcript        | ENSMUST00000165234 | protein coding           | rs47443090          |
| 2:155643238-155643238 | intron_variant                  | MODIFIER | Trpc4ap      | ENSMUSG00000038324 | Transcript        | ENSMUST00000041059 | protein coding           | rs27308652          |
| 2:155643238-155643238 | intron_variant                  | MODIFIER | Trpc4ap      | ENSMUSG00000038324 | Transcript        | ENSMUST00000103140 | protein coding           | rs27308652          |



|                       |                                 |          |         |                     |                   |                     |                         |             |
|-----------------------|---------------------------------|----------|---------|---------------------|-------------------|---------------------|-------------------------|-------------|
| 2:157993884-157993884 | intron variant                  | MODIFIER | Tti1    | ENSMUSG00000027650  | Transcript        | ENSMUST00000109522  | protein coding          | rs256796174 |
| 2:157993884-157993884 | downstream_gene_variant         | MODIFIER | Tti1    | ENSMUSG000000027650 | Transcript        | ENSMUST00000126541  | processed_transcript    | rs256796174 |
| 2:158317769-158317769 | intron_variant                  | MODIFIER | Lbp     | ENSMUSG00000016024  | Transcript        | ENSMUST00000016168  | protein_coding          | rs46179339  |
| 2:158317769-158317769 | intron_variant                  | MODIFIER | Lbp     | ENSMUSG00000016024  | Transcript        | ENSMUST00000129811  | protein_coding          | rs46179339  |
| 2:158317769-158317769 | non coding transcript exon var  | MODIFIER | Lbp     | ENSMUSG00000016024  | Transcript        | ENSMUST00000146600  | retained_intron         | rs46179339  |
| 2:158317769-158317769 | intron variant,non coding trans | MODIFIER | Lbp     | ENSMUSG00000016024  | Transcript        | ENSMUST00000152541  | processed_transcript    | rs46179339  |
| 2:158317802-158317802 | intron variant                  | MODIFIER | Lbp     | ENSMUSG00000016024  | Transcript        | ENSMUST00000016168  | protein coding          | rs247533409 |
| 2:158317802-158317802 | intron_variant                  | MODIFIER | Lbp     | ENSMUSG00000016024  | Transcript        | ENSMUST00000129811  | protein_coding          | rs247533409 |
| 2:158317802-158317802 | non_coding_transcript_exon_var  | MODIFIER | Lbp     | ENSMUSG00000016024  | Transcript        | ENSMUST00000146600  | retained_intron         | rs247533409 |
| 2:158317802-158317802 | intron_variant,non_coding_trans | MODIFIER | Lbp     | ENSMUSG00000016024  | Transcript        | ENSMUST00000152541  | processed_transcript    | rs247533409 |
| 2:158317960-158317960 | intron variant                  | MODIFIER | Lbp     | ENSMUSG00000016024  | Transcript        | ENSMUST00000016168  | protein coding          | rs259708555 |
| 2:158317960-158317960 | intron variant                  | MODIFIER | Lbp     | ENSMUSG00000016024  | Transcript        | ENSMUST00000129811  | protein coding          | rs259708555 |
| 2:158317960-158317960 | non coding transcript exon var  | MODIFIER | Lbp     | ENSMUSG00000016024  | Transcript        | ENSMUST00000146600  | retained_intron         | rs259708555 |
| 2:158317960-158317960 | intron variant,non coding trans | MODIFIER | Lbp     | ENSMUSG00000016024  | Transcript        | ENSMUST00000152541  | processed_transcript    | rs259708555 |
| 2:158318736-158318736 | intron_variant                  | MODIFIER | Lbp     | ENSMUSG00000016024  | Transcript        | ENSMUST00000016168  | protein_coding          | rs27303850  |
| 2:158318736-158318736 | intron_variant                  | MODIFIER | Lbp     | ENSMUSG00000016024  | Transcript        | ENSMUST00000129811  | protein_coding          | rs27303850  |
| 2:158318736-158318736 | downstream_gene_variant         | MODIFIER | Lbp     | ENSMUSG00000016024  | Transcript        | ENSMUST00000146600  | retained_intron         | rs27303850  |
| 2:158318736-158318736 | intron variant,non coding trans | MODIFIER | Lbp     | ENSMUSG00000016024  | Transcript        | ENSMUST00000152541  | processed_transcript    | rs27303850  |
| 2:158319100-158319100 | intron variant                  | MODIFIER | Lbp     | ENSMUSG00000016024  | Transcript        | ENSMUST00000016168  | protein coding          | rs259485455 |
| 2:158319100-158319100 | intron variant                  | MODIFIER | Lbp     | ENSMUSG00000016024  | Transcript        | ENSMUST00000129811  | protein coding          | rs259485455 |
| 2:158319100-158319100 | downstream_gene_variant         | MODIFIER | Lbp     | ENSMUSG00000016024  | Transcript        | ENSMUST00000146600  | retained_intron         | rs259485455 |
| 2:158319100-158319100 | intron_variant,non_coding_trans | MODIFIER | Lbp     | ENSMUSG00000016024  | Transcript        | ENSMUST00000152541  | processed_transcript    | rs259485455 |
| 2:158327893-158327893 | intron_variant                  | MODIFIER | Lbp     | ENSMUSG00000016024  | Transcript        | ENSMUST00000016168  | protein_coding          | rs27353956  |
| 2:158327893-158327893 | downstream gene variant         | MODIFIER | Lbp     | ENSMUSG00000016024  | Transcript        | ENSMUST00000129811  | protein coding          | rs27353956  |
| 2:158328097-158328097 | intron variant                  | MODIFIER | Lbp     | ENSMUSG00000016024  | Transcript        | ENSMUST00000016168  | protein coding          | rs27353953  |
| 2:158328097-158328097 | downstream gene variant         | MODIFIER | Lbp     | ENSMUSG00000016024  | Transcript        | ENSMUST00000129811  | protein coding          | rs27353953  |
| 2:158328617-158328617 | intron variant                  | MODIFIER | Lbp     | ENSMUSG00000016024  | Transcript        | ENSMUST00000016168  | protein coding          | rs27353950  |
| 2:158328617-158328617 | downstream_gene_variant         | MODIFIER | Lbp     | ENSMUSG00000016024  | Transcript        | ENSMUST00000129811  | protein_coding          | rs27353950  |
| 2:158330319-158330319 | intron_variant                  | MODIFIER | Lbp     | ENSMUSG00000016024  | Transcript        | ENSMUST00000016168  | protein_coding          | rs27353941  |
| 2:158637611-158637611 | intron_variant                  | MODIFIER | Actr5   | ENSMUSG00000037761  | Transcript        | ENSMUST00000045644  | protein_coding          | rs51319236  |
| 2:158637611-158637611 | intron variant,non coding trans | MODIFIER | Actr5   | ENSMUSG00000037761  | Transcript        | ENSMUST00000142531  | retained_intron         | rs51319236  |
| 2:158637611-158637611 | upstream gene variant           | MODIFIER | Mir3474 | ENSMUSG00000093120  | Transcript        | ENSMUST00000175379  | miRNA                   | rs51319236  |
| 2:158637611-158637611 | downstream gene variant         | MODIFIER | Actr5   | ENSMUSG00000037761  | Transcript        | ENSMUST00000183586  | processed_transcript    | rs51319236  |
| 2:158637611-158637611 | intron_variant,NMD_transcript_v | MODIFIER | Actr5   | ENSMUSG00000037761  | Transcript        | ENSMUST00000183731  | nonsense_mediated_decay | rs51319236  |
| 2:165784823-165784823 | downstream_gene_variant         | MODIFIER | Zmynd8  | ENSMUSG00000039671  | Transcript        | ENSMUST00000018050  | protein_coding          | -           |
| 2:165784823-165784823 | downstream_gene_variant         | MODIFIER | Zmynd8  | ENSMUSG00000039671  | Transcript        | ENSMUST00000088113  | protein_coding          | -           |
| 2:165784823-165784823 | 3 prime UTR variant             | MODIFIER | Zmynd8  | ENSMUSG00000039671  | Transcript        | ENSMUST00000099084  | protein_coding          | -           |
| 2:165784823-165784823 | 3 prime UTR variant             | MODIFIER | Zmynd8  | ENSMUSG00000039671  | Transcript        | ENSMUST00000109266  | protein_coding          | -           |
| 2:165784823-165784823 | downstream gene variant         | MODIFIER | Zmynd8  | ENSMUSG00000039671  | Transcript        | ENSMUST00000109269  | protein_coding          | -           |
| 2:165784823-165784823 | downstream gene variant         | MODIFIER | Zmynd8  | ENSMUSG00000039671  | Transcript        | ENSMUST00000152682  | processed_transcript    | -           |
| 2:165784823-165784823 | 3_prime_UTR_variant             | MODIFIER | Zmynd8  | ENSMUSG00000039671  | Transcript        | ENSMUST00000170272  | protein_coding          | -           |
| 2:165784823-165784823 | 3_prime_UTR_variant             | MODIFIER | Zmynd8  | ENSMUSG00000039671  | Transcript        | ENSMUST00000177633  | protein_coding          | -           |
| 2:165784823-165784823 | regulatory_region_variant       | MODIFIER | -       | -                   | RegulatoryFeature | ENSMUSR000000638290 | open_chromatin_region   | -           |
| 2:166075605-166075605 | intron variant                  | MODIFIER | Sulf2   | ENSMUSG00000006800  | Transcript        | ENSMUST00000088086  | protein coding          | rs6362627   |
| 2:166075605-166075605 | downstream gene variant         | MODIFIER | Ncoa3   | ENSMUSG00000027678  | Transcript        | ENSMUST00000088095  | protein coding          | rs6362627   |
| 2:166075605-166075605 | intron variant                  | MODIFIER | Sulf2   | ENSMUSG00000006800  | Transcript        | ENSMUST00000109249  | protein_coding          | rs6362627   |
| 2:166075605-166075605 | downstream_gene_variant         | MODIFIER | Ncoa3   | ENSMUSG00000027678  | Transcript        | ENSMUST00000109252  | protein_coding          | rs6362627   |
| 2:166075605-166075605 | intron_variant,non_coding_trans | MODIFIER | Sulf2   | ENSMUSG00000006800  | Transcript        | ENSMUST00000125503  | retained_intron         | rs6362627   |
| 2:166075605-166075605 | intron_variant,non_coding_trans | MODIFIER | Sulf2   | ENSMUSG00000006800  | Transcript        | ENSMUST00000143996  | retained_intron         | rs6362627   |
| 2:166075605-166075605 | intron variant                  | MODIFIER | Sulf2   | ENSMUSG00000006800  | Transcript        | ENSMUST00000146497  | protein_coding          | rs6362627   |
| 2:166076786-166076786 | intron variant                  | MODIFIER | Sulf2   | ENSMUSG00000006800  | Transcript        | ENSMUST00000088086  | protein coding          | rs29961095  |
| 2:166076786-166076786 | downstream gene variant         | MODIFIER | Ncoa3   | ENSMUSG00000027678  | Transcript        | ENSMUST00000088095  | protein coding          | rs29961095  |
| 2:166076786-166076786 | intron variant                  | MODIFIER | Sulf2   | ENSMUSG00000006800  | Transcript        | ENSMUST00000109249  | protein_coding          | rs29961095  |
| 2:166076786-166076786 | upstream_gene_variant           | MODIFIER | Sulf2   | ENSMUSG00000006800  | Transcript        | ENSMUST00000125503  | retained_intron         | rs29961095  |
| 2:166076786-166076786 | intron_variant,non_coding_trans | MODIFIER | Sulf2   | ENSMUSG00000006800  | Transcript        | ENSMUST00000143996  | retained_intron         | rs29961095  |
| 2:166076786-166076786 | intron_variant                  | MODIFIER | Sulf2   | ENSMUSG00000006800  | Transcript        | ENSMUST00000146497  | protein_coding          | rs29961095  |
| 2:168634687-168634687 | 3 prime UTR variant             | MODIFIER | Atp9a   | ENSMUSG00000027546  | Transcript        | ENSMUST00000029060  | protein_coding          | rs27288812  |
| 2:168634687-168634687 | 3 prime UTR variant             | MODIFIER | Atp9a   | ENSMUSG00000027546  | Transcript        | ENSMUST00000109175  | protein_coding          | rs27288812  |
| 2:168634687-168634687 | 3 prime UTR variant             | MODIFIER | Atp9a   | ENSMUSG00000027546  | Transcript        | ENSMUST00000109176  | protein_coding          | rs27288812  |
| 2:168634687-168634687 | 3_prime_UTR_variant             | MODIFIER | Atp9a   | ENSMUSG00000027546  | Transcript        | ENSMUST00000109177  | protein_coding          | rs27288812  |
| 2:168634687-168634687 | 3_prime_UTR_variant             | MODIFIER | Atp9a   | ENSMUSG00000027546  | Transcript        | ENSMUST00000178504  | protein_coding          | rs27288812  |
| 2:31615894-31615894   | 3_prime_UTR_variant             | MODIFIER | Fubp3   | ENSMUSG00000026843  | Transcript        | ENSMUST00000055244  | protein_coding          | rs864259738 |
| 2:31615894-31615894   | intron variant                  | MODIFIER | Fubp3   | ENSMUSG00000026843  | Transcript        | ENSMUST00000113482  | protein_coding          | rs864259738 |
| 2:31615894-31615894   | 3 prime UTR variant             | MODIFIER | Fubp3   | ENSMUSG00000026843  | Transcript        | ENSMUST00000129903  | protein_coding          | rs864259738 |
| 2:31615894-31615894   | intron variant                  | MODIFIER | Fubp3   | ENSMUSG00000026843  | Transcript        | ENSMUST00000130578  | protein_coding          | rs864259738 |
| 2:31615894-31615894   | non coding transcript exon var  | MODIFIER | Fubp3   | ENSMUSG00000026843  | Transcript        | ENSMUST00000132534  | retained_intron         | rs864259738 |
| 2:31615894-31615894   | downstream_gene_variant         | MODIFIER | Fubp3   | ENSMUSG00000026843  | Transcript        | ENSMUST00000134553  | nonsense_mediated_decay | rs864259738 |
| 2:31615894-31615894   | intron_variant                  | MODIFIER | Fubp3   | ENSMUSG00000026843  | Transcript        | ENSMUST00000150473  | protein_coding          | rs864259738 |
| 2:31615894-31615894   | downstream_gene_variant         | MODIFIER | Mir6998 | ENSMUSG00000098904  | Transcript        | ENSMUST00000183343  | miRNA                   | rs864259738 |

|                       |                                 |          |         |                     |                   |                     |                         |             |
|-----------------------|---------------------------------|----------|---------|---------------------|-------------------|---------------------|-------------------------|-------------|
| 2:3504036-3504036     | intron variant                  | MODIFIER | Hspa14  | ENSMUSG00000109865  | Transcript        | ENSMUST00000027961  | protein coding          | rs27110587  |
| 2:3504036-3504036     | downstream_gene_variant         | MODIFIER | Gm45902 | ENSMUSG000000051396 | Transcript        | ENSMUST00000124331  | protein coding          | rs27110587  |
| 2:3504036-3504036     | upstream_gene_variant           | MODIFIER | Hspa14  | ENSMUSG00000109865  | Transcript        | ENSMUST00000135157  | retained_intron         | rs27110587  |
| 2:3504036-3504036     | downstream_gene_variant         | MODIFIER | Gm45902 | ENSMUSG00000051396  | Transcript        | ENSMUST00000140494  | protein_coding          | rs27110587  |
| 2:81510802-81510802   | intergenic variant              | MODIFIER | -       | -                   | -                 | -                   | -                       | -           |
| 2:90739497-90739497   | downstream gene variant         | MODIFIER | Nup160  | ENSMUSG000000051329 | Transcript        | ENSMUST000000057481 | protein coding          | rs864286220 |
| 2:90739497-90739497   | downstream gene variant         | MODIFIER | Nup160  | ENSMUSG000000051329 | Transcript        | ENSMUST00000126503  | processed transcript    | rs864286220 |
| 3:10322192-10322192   | intron_variant                  | MODIFIER | Impa1   | ENSMUSG000000027531 | Transcript        | ENSMUST00000065938  | protein_coding          | rs108627359 |
| 3:10322192-10322192   | intron_variant                  | MODIFIER | Impa1   | ENSMUSG000000027531 | Transcript        | ENSMUST00000118410  | protein_coding          | rs108627359 |
| 3:10322192-10322192   | downstream_gene_variant         | MODIFIER | Impa1   | ENSMUSG000000027531 | Transcript        | ENSMUST00000128912  | protein_coding          | rs108627359 |
| 3:10322192-10322192   | intron variant                  | MODIFIER | Impa1   | ENSMUSG000000027531 | Transcript        | ENSMUST00000191670  | protein coding          | rs108627359 |
| 3:10322192-10322192   | intron variant,NMD transcript v | MODIFIER | Gm38303 | ENSMUSG00000103392  | Transcript        | ENSMUST00000192603  | nonsense mediated decay | rs108627359 |
| 3:116676877-116676877 | intron variant                  | MODIFIER | Slc35a3 | ENSMUSG00000027957  | Transcript        | ENSMUST00000029569  | protein coding          | -           |
| 3:116676877-116676877 | intron variant                  | MODIFIER | Slc35a3 | ENSMUSG00000027957  | Transcript        | ENSMUST00000120120  | protein coding          | -           |
| 3:116676877-116676877 | intron_variant                  | MODIFIER | Gm43191 | ENSMUSG00000105103  | Transcript        | ENSMUST00000140672  | protein_coding          | -           |
| 3:116676877-116676877 | downstream_gene_variant         | MODIFIER | Slc35a3 | ENSMUSG00000027957  | Transcript        | ENSMUST00000153108  | protein_coding          | -           |
| 3:116676877-116676877 | upstream_gene_variant           | MODIFIER | Slc35a3 | ENSMUSG00000027957  | Transcript        | ENSMUST00000196331  | processed_transcript    | -           |
| 3:116676877-116676877 | downstream gene variant         | MODIFIER | Slc35a3 | ENSMUSG00000027957  | Transcript        | ENSMUST00000196335  | protein coding          | -           |
| 3:116744163-116744163 | 3 prime UTR variant             | MODIFIER | Aql     | ENSMUSG00000033400  | Transcript        | ENSMUST00000040603  | protein coding          | -           |
| 3:116744163-116744163 | 3 prime UTR variant             | MODIFIER | Aql     | ENSMUSG00000033400  | Transcript        | ENSMUST00000160484  | protein coding          | -           |
| 3:116744163-116744163 | downstream_gene_variant         | MODIFIER | Aql     | ENSMUSG00000033400  | Transcript        | ENSMUST00000161336  | nonsense mediated_decay | -           |
| 3:116744163-116744163 | 3_prime_UTR_variant             | MODIFIER | Aql     | ENSMUSG00000033400  | Transcript        | ENSMUST00000162792  | protein_coding          | -           |
| 3:153931979-153931979 | intron_variant                  | MODIFIER | Acadm   | ENSMUSG00000062908  | Transcript        | ENSMUST00000072697  | protein_coding          | rs30604906  |
| 3:153931979-153931979 | downstream gene variant         | MODIFIER | Acadm   | ENSMUSG00000062908  | Transcript        | ENSMUST00000150070  | protein coding          | rs30604906  |
| 3:153931979-153931979 | downstream gene variant         | MODIFIER | Acadm   | ENSMUSG00000062908  | Transcript        | ENSMUST00000156310  | nonsense mediated decay | rs30604906  |
| 3:153931979-153931979 | downstream gene variant         | MODIFIER | Acadm   | ENSMUSG00000062908  | Transcript        | ENSMUST00000196188  | retained intron         | rs30604906  |
| 3:153931979-153931979 | upstream gene variant           | MODIFIER | Acadm   | ENSMUSG00000062908  | Transcript        | ENSMUST00000196688  | retained intron         | rs30604906  |
| 3:153931979-153931979 | intron_variant,non_coding_trans | MODIFIER | Acadm   | ENSMUSG00000062908  | Transcript        | ENSMUST00000199342  | retained_intron         | rs30604906  |
| 3:153931979-153931979 | intron_variant,non_coding_trans | MODIFIER | Acadm   | ENSMUSG00000062908  | Transcript        | ENSMUST00000200250  | retained_intron         | rs30604906  |
| 3:153932929-153932929 | intron_variant                  | MODIFIER | Acadm   | ENSMUSG00000062908  | Transcript        | ENSMUST00000072697  | protein_coding          | rs30453927  |
| 3:153932929-153932929 | downstream gene variant         | MODIFIER | Acadm   | ENSMUSG00000062908  | Transcript        | ENSMUST00000150070  | protein coding          | rs30453927  |
| 3:153932929-153932929 | downstream gene variant         | MODIFIER | Acadm   | ENSMUSG00000062908  | Transcript        | ENSMUST00000156310  | nonsense mediated decay | rs30453927  |
| 3:153932929-153932929 | downstream gene variant         | MODIFIER | Acadm   | ENSMUSG00000062908  | Transcript        | ENSMUST00000196188  | retained intron         | rs30453927  |
| 3:153932929-153932929 | upstream_gene_variant           | MODIFIER | Acadm   | ENSMUSG00000062908  | Transcript        | ENSMUST00000196688  | retained_intron         | rs30453927  |
| 3:153932929-153932929 | intron_variant,non_coding_trans | MODIFIER | Acadm   | ENSMUSG00000062908  | Transcript        | ENSMUST00000199342  | retained_intron         | rs30453927  |
| 3:153932929-153932929 | intron_variant,non_coding_trans | MODIFIER | Acadm   | ENSMUSG00000062908  | Transcript        | ENSMUST00000200250  | retained_intron         | rs30453927  |
| 3:153932929-153932929 | regulatory region variant       | MODIFIER | -       | -                   | RegulatoryFeature | ENSMUSR00000656346  | open chromatin region   | rs30453927  |
| 3:32336903-32336903   | 3 prime UTR variant             | MODIFIER | Zmat3   | ENSMUSG00000027663  | Transcript        | ENSMUST00000029199  | protein coding          | rs29864994  |
| 3:32336903-32336903   | 3 prime UTR variant             | MODIFIER | Zmat3   | ENSMUSG00000027663  | Transcript        | ENSMUST00000168566  | protein coding          | rs29864994  |
| 3:32339795-32339795   | 3 prime UTR variant             | MODIFIER | Zmat3   | ENSMUSG00000027663  | Transcript        | ENSMUST00000029199  | protein coding          | rs29863219  |
| 3:32339795-32339795   | 3_prime_UTR_variant             | MODIFIER | Zmat3   | ENSMUSG00000027663  | Transcript        | ENSMUST00000168566  | protein_coding          | rs29863219  |
| 3:32340860-32340860   | 3_prime_UTR_variant             | MODIFIER | Zmat3   | ENSMUSG00000027663  | Transcript        | ENSMUST00000029199  | protein_coding          | rs30558420  |
| 3:32340860-32340860   | 3_prime_UTR_variant             | MODIFIER | Zmat3   | ENSMUSG00000027663  | Transcript        | ENSMUST00000168566  | protein_coding          | rs30558420  |
| 3:32340861-32340861   | 3 prime UTR variant             | MODIFIER | Zmat3   | ENSMUSG00000027663  | Transcript        | ENSMUST00000029199  | protein coding          | rs30006568  |
| 3:32340861-32340861   | 3 prime UTR variant             | MODIFIER | Zmat3   | ENSMUSG00000027663  | Transcript        | ENSMUST00000168566  | protein coding          | rs30006568  |
| 3:33801010-33801010   | synonymous variant              | LOW      | Ttc14   | ENSMUSG00000027677  | Transcript        | ENSMUST00000099153  | protein coding          | rs50656174  |
| 3:33801010-33801010   | synonymous_variant              | LOW      | Ttc14   | ENSMUSG00000027677  | Transcript        | ENSMUST00000108210  | protein_coding          | rs50656174  |
| 3:33801010-33801010   | synonymous_variant              | LOW      | Ttc14   | ENSMUSG00000027677  | Transcript        | ENSMUST00000117915  | protein_coding          | rs50656174  |
| 3:33801010-33801010   | synonymous_variant              | LOW      | Ttc14   | ENSMUSG00000027677  | Transcript        | ENSMUST00000196139  | protein_coding          | rs50656174  |
| 3:33801010-33801010   | upstream gene variant           | MODIFIER | Ttc14   | ENSMUSG00000027677  | Transcript        | ENSMUST00000196369  | nonsense mediated decay | rs50656174  |
| 3:33801010-33801010   | synonymous variant              | LOW      | Ttc14   | ENSMUSG00000027677  | Transcript        | ENSMUST00000196975  | protein coding          | rs50656174  |
| 3:33801010-33801010   | upstream gene variant           | MODIFIER | Ttc14   | ENSMUSG00000027677  | Transcript        | ENSMUST00000197592  | retained intron         | rs50656174  |
| 3:33801010-33801010   | synonymous variant              | LOW      | Ttc14   | ENSMUSG00000027677  | Transcript        | ENSMUST00000198529  | protein coding          | rs50656174  |
| 3:33801010-33801010   | synonymous_variant,NMD_trans    | LOW      | Ttc14   | ENSMUSG00000027677  | Transcript        | ENSMUST00000199222  | nonsense mediated_decay | rs50656174  |
| 3:33801010-33801010   | downstream_gene_variant         | MODIFIER | Ttc14   | ENSMUSG00000027677  | Transcript        | ENSMUST00000199523  | retained_intron         | rs50656174  |
| 3:33801010-33801010   | synonymous_variant              | LOW      | Ttc14   | ENSMUSG00000027677  | Transcript        | ENSMUST00000200271  | protein_coding          | rs50656174  |
| 3:33801010-33801010   | non coding transcript exon var  | MODIFIER | Ttc14   | ENSMUSG00000027677  | Transcript        | ENSMUST00000200559  | retained intron         | rs50656174  |
| 3:33801010-33801010   | regulatory region variant       | MODIFIER | -       | -                   | RegulatoryFeature | ENSMUSR00000172538  | promoter                | rs50656174  |
| 3:33804834-33804834   | intron variant                  | MODIFIER | Ttc14   | ENSMUSG00000027677  | Transcript        | ENSMUST00000099153  | protein coding          | rs30304375  |
| 3:33804834-33804834   | intron_variant                  | MODIFIER | Ttc14   | ENSMUSG00000027677  | Transcript        | ENSMUST00000108210  | protein_coding          | rs30304375  |
| 3:33804834-33804834   | intron_variant                  | MODIFIER | Ttc14   | ENSMUSG00000027677  | Transcript        | ENSMUST00000117915  | protein_coding          | rs30304375  |
| 3:33804834-33804834   | downstream_gene_variant         | MODIFIER | Ttc14   | ENSMUSG00000027677  | Transcript        | ENSMUST00000196139  | protein_coding          | rs30304375  |
| 3:33804834-33804834   | intron variant,NMD transcript v | MODIFIER | Ttc14   | ENSMUSG00000027677  | Transcript        | ENSMUST00000196369  | nonsense mediated decay | rs30304375  |
| 3:33804834-33804834   | intron variant                  | MODIFIER | Ttc14   | ENSMUSG00000027677  | Transcript        | ENSMUST00000196975  | protein coding          | rs30304375  |
| 3:33804834-33804834   | downstream gene variant         | MODIFIER | Ttc14   | ENSMUSG00000027677  | Transcript        | ENSMUST00000197592  | retained intron         | rs30304375  |
| 3:33804834-33804834   | intron variant                  | MODIFIER | Ttc14   | ENSMUSG00000027677  | Transcript        | ENSMUST00000198529  | protein coding          | rs30304375  |
| 3:33804834-33804834   | intron_variant,NMD_transcript_v | MODIFIER | Ttc14   | ENSMUSG00000027677  | Transcript        | ENSMUST00000199222  | nonsense mediated_decay | rs30304375  |
| 3:33804834-33804834   | downstream_gene_variant         | MODIFIER | Ttc14   | ENSMUSG00000027677  | Transcript        | ENSMUST00000199523  | retained_intron         | rs30304375  |
| 3:33804834-33804834   | intron_variant                  | MODIFIER | Ttc14   | ENSMUSG00000027677  | Transcript        | ENSMUST00000200271  | protein_coding          | rs30304375  |

|                       |                                 |          |               |                    |                   |                    |                         |             |
|-----------------------|---------------------------------|----------|---------------|--------------------|-------------------|--------------------|-------------------------|-------------|
| 3:33804834-33804834   | downstream gene variant         | MODIFIER | Ttc14         | ENSMUSG00000027677 | Transcript        | ENSMUST00000200559 | retained intron         | rs30304375  |
| 3:65959007-65959007   | upstream_gene_variant           | MODIFIER | Ccn1l         | ENSMUSG00000027829 | Transcript        | ENSMUST00000029416 | protein_coding          | rs262950115 |
| 3:65959007-65959007   | upstream_gene_variant           | MODIFIER | Ccn1l         | ENSMUSG00000027829 | Transcript        | ENSMUST00000122919 | retained_intron         | rs262950115 |
| 3:65959007-65959007   | upstream_gene_variant           | MODIFIER | Ccn1l         | ENSMUSG00000027829 | Transcript        | ENSMUST00000129002 | nonsense_mediated_decay | rs262950115 |
| 3:65959007-65959007   | upstream_gene_variant           | MODIFIER | Ccn1l         | ENSMUSG00000027829 | Transcript        | ENSMUST00000135719 | nonsense mediated decay | rs262950115 |
| 3:65959007-65959007   | upstream gene variant           | MODIFIER | Ccn1l         | ENSMUSG00000027829 | Transcript        | ENSMUST00000142153 | retained intron         | rs262950115 |
| 3:65959007-65959007   | upstream gene variant           | MODIFIER | Ccn1l         | ENSMUSG00000027829 | Transcript        | ENSMUST00000144810 | nonsense mediated decay | rs262950115 |
| 3:65959007-65959007   | upstream_gene_variant           | MODIFIER | Ccn1l         | ENSMUSG00000027829 | Transcript        | ENSMUST00000145186 | nonsense_mediated_decay | rs262950115 |
| 3:65959007-65959007   | upstream_gene_variant           | MODIFIER | Ccn1l         | ENSMUSG00000027829 | Transcript        | ENSMUST00000148623 | retained_intron         | rs262950115 |
| 3:65959007-65959007   | upstream_gene_variant           | MODIFIER | Ccn1l         | ENSMUSG00000027829 | Transcript        | ENSMUST00000149160 | retained_intron         | rs262950115 |
| 3:65959007-65959007   | upstream gene variant           | MODIFIER | Ccn1l         | ENSMUSG00000027829 | Transcript        | ENSMUST00000154585 | nonsense mediated decay | rs262950115 |
| 3:65959007-65959007   | non coding transcript exon var  | MODIFIER | Gm37305       | ENSMUSG00000103041 | Transcript        | ENSMUST00000195714 | antisense               | rs262950115 |
| 3:65959007-65959007   | regulatory region variant       | MODIFIER | -             | -                  | RegulatoryFeature | ENSMUSR00000175578 | promoter                | rs262950115 |
| 3:88411654-88411654   | upstream gene variant           | MODIFIER | Pmf1          | ENSMUSG00000028066 | Transcript        | ENSMUST00000056370 | protein_coding          | -           |
| 3:88411654-88411654   | 3_prime_UTR_variant             | MODIFIER | Slc25a44      | ENSMUSG00000050144 | Transcript        | ENSMUST00000057935 | protein_coding          | -           |
| 3:88411654-88411654   | 3_prime_UTR_variant             | MODIFIER | Slc25a44      | ENSMUSG00000050144 | Transcript        | ENSMUST00000168755 | protein_coding          | -           |
| 3:88411654-88411654   | upstream_gene_variant           | MODIFIER | Pmf1          | ENSMUSG00000028066 | Transcript        | ENSMUST00000191622 | retained_intron         | -           |
| 3:88411654-88411654   | upstream gene variant           | MODIFIER | Pmf1          | ENSMUSG00000028066 | Transcript        | ENSMUST00000192365 | processed transcript    | -           |
| 3:88411654-88411654   | upstream gene variant           | MODIFIER | Pmf1          | ENSMUSG00000028066 | Transcript        | ENSMUST00000192909 | nonsense mediated decay | -           |
| 3:88411654-88411654   | upstream gene variant           | MODIFIER | Pmf1          | ENSMUSG00000028066 | Transcript        | ENSMUST00000193338 | protein_coding          | -           |
| 3:88411654-88411654   | 3_prime_UTR_variant             | MODIFIER | Slc25a44      | ENSMUSG00000050144 | Transcript        | ENSMUST00000193433 | protein_coding          | -           |
| 3:88411654-88411654   | 3_prime_UTR_variant             | MODIFIER | Slc25a44      | ENSMUSG00000050144 | Transcript        | ENSMUST00000195657 | protein_coding          | -           |
| 3:96624315-96624315   | intron_variant,non_coding_trans | MODIFIER | 6330549D23Rik | ENSMUSG00000045327 | Transcript        | ENSMUST00000059190 | processed_transcript    | rs864292968 |
| 3:96624315-96624315   | 3 prime UTR variant             | MODIFIER | Lix1l         | ENSMUSG00000049288 | Transcript        | ENSMUST00000062058 | protein_coding          | rs864292968 |
| 3:96624315-96624315   | intron_variant,non_coding_trans | MODIFIER | 6330549D23Rik | ENSMUSG00000045327 | Transcript        | ENSMUST00000160818 | processed_transcript    | rs864292968 |
| 3:96624315-96624315   | downstream gene variant         | MODIFIER | Lix1l         | ENSMUSG00000049288 | Transcript        | ENSMUST00000199166 | retained intron         | rs864292968 |
| 4:107055235-107055235 | downstream gene variant         | MODIFIER | Mrip37        | ENSMUSG00000028622 | Transcript        | ENSMUST00000030365 | protein_coding          | rs864257304 |
| 4:107055235-107055235 | downstream_gene_variant         | MODIFIER | Mrip37        | ENSMUSG00000028622 | Transcript        | ENSMUST00000125157 | processed_transcript    | rs864257304 |
| 4:107055235-107055235 | downstream_gene_variant         | MODIFIER | Mrip37        | ENSMUSG00000028622 | Transcript        | ENSMUST00000125397 | processed_transcript    | rs864257304 |
| 4:107055235-107055235 | downstream_gene_variant         | MODIFIER | Mrip37        | ENSMUSG00000028622 | Transcript        | ENSMUST00000141150 | retained_intron         | rs864257304 |
| 4:140718569-140718569 | intron variant                  | MODIFIER | Rcc2          | ENSMUSG00000040945 | Transcript        | ENSMUST00000038893 | protein_coding          | rs27611298  |
| 4:140718569-140718569 | intron variant                  | MODIFIER | Rcc2          | ENSMUSG00000040945 | Transcript        | ENSMUST00000071169 | protein_coding          | rs27611298  |
| 4:140718569-140718569 | downstream gene variant         | MODIFIER | Rcc2          | ENSMUSG00000040945 | Transcript        | ENSMUST00000129838 | processed_transcript    | rs27611298  |
| 4:140718569-140718569 | downstream_gene_variant         | MODIFIER | Rcc2          | ENSMUSG00000040945 | Transcript        | ENSMUST00000138682 | processed_transcript    | rs27611298  |
| 4:140718569-140718569 | downstream_gene_variant         | MODIFIER | Gm25951       | ENSMUSG00000093071 | Transcript        | ENSMUST00000175300 | miRNA                   | rs27611298  |
| 4:140918614-140918614 | intron_variant                  | MODIFIER | Padi2         | ENSMUSG00000028927 | Transcript        | ENSMUST00000030765 | protein_coding          | rs48530552  |
| 4:140918614-140918614 | upstream gene variant           | MODIFIER | Gm26226       | ENSMUSG00000064443 | Transcript        | ENSMUST00000082509 | snRNA                   | rs48530552  |
| 4:140918717-140918717 | intron variant                  | MODIFIER | Padi2         | ENSMUSG00000028927 | Transcript        | ENSMUST00000030765 | protein_coding          | rs47649325  |
| 4:140918717-140918717 | non coding transcript exon var  | MODIFIER | Gm26226       | ENSMUSG00000064443 | Transcript        | ENSMUST00000082509 | snRNA                   | rs47649325  |
| 4:140918940-140918940 | intron variant                  | MODIFIER | Padi2         | ENSMUSG00000028927 | Transcript        | ENSMUST00000030765 | protein_coding          | rs49698867  |
| 4:140918940-140918940 | downstream_gene_variant         | MODIFIER | Gm26226       | ENSMUSG00000064443 | Transcript        | ENSMUST00000082509 | snRNA                   | rs49698867  |
| 4:140919154-140919154 | intron_variant                  | MODIFIER | Padi2         | ENSMUSG00000028927 | Transcript        | ENSMUST00000030765 | protein_coding          | rs47519700  |
| 4:140919154-140919154 | downstream_gene_variant         | MODIFIER | Gm26226       | ENSMUSG00000064443 | Transcript        | ENSMUST00000082509 | snRNA                   | rs47519700  |
| 4:140931899-140931899 | intron variant                  | MODIFIER | Padi2         | ENSMUSG00000028927 | Transcript        | ENSMUST00000030765 | protein_coding          | rs28276094  |
| 4:140931899-140931899 | intron variant,non_coding_trans | MODIFIER | Padi2         | ENSMUSG00000028927 | Transcript        | ENSMUST00000148160 | processed_transcript    | rs28276094  |
| 4:140932914-140932914 | intron variant                  | MODIFIER | Padi2         | ENSMUSG00000028927 | Transcript        | ENSMUST00000030765 | protein_coding          | rs47403939  |
| 4:140932914-140932914 | downstream_gene_variant         | MODIFIER | Padi2         | ENSMUSG00000028927 | Transcript        | ENSMUST00000148160 | processed_transcript    | rs47403939  |
| 4:140932955-140932955 | intron_variant                  | MODIFIER | Padi2         | ENSMUSG00000028927 | Transcript        | ENSMUST00000030765 | protein_coding          | rs47135910  |
| 4:140932955-140932955 | downstream_gene_variant         | MODIFIER | Padi2         | ENSMUSG00000028927 | Transcript        | ENSMUST00000148160 | processed_transcript    | rs47135910  |
| 4:140974101-140974101 | intron variant                  | MODIFIER | Sdhh          | ENSMUSG00000009863 | Transcript        | ENSMUST00000010007 | protein_coding          | rs260421764 |
| 4:140974101-140974101 | non coding transcript exon var  | MODIFIER | Sdhh          | ENSMUSG00000009863 | Transcript        | ENSMUST00000125780 | processed_transcript    | rs260421764 |
| 4:140974101-140974101 | intron variant,non_coding_trans | MODIFIER | Sdhh          | ENSMUSG00000009863 | Transcript        | ENSMUST00000129181 | processed_transcript    | rs260421764 |
| 4:141002272-141002272 | intron variant                  | MODIFIER | Atp13a2       | ENSMUSG00000036622 | Transcript        | ENSMUST00000037055 | protein_coding          | rs32601055  |
| 4:141002272-141002272 | downstream_gene_variant         | MODIFIER | Atp13a2       | ENSMUSG00000036622 | Transcript        | ENSMUST00000125797 | retained_intron         | rs32601055  |
| 4:141002272-141002272 | intron_variant                  | MODIFIER | Atp13a2       | ENSMUSG00000036622 | Transcript        | ENSMUST00000127833 | protein_coding          | rs32601055  |
| 4:141002272-141002272 | downstream_gene_variant         | MODIFIER | Atp13a2       | ENSMUSG00000036622 | Transcript        | ENSMUST00000135117 | processed_transcript    | rs32601055  |
| 4:141002272-141002272 | upstream gene variant           | MODIFIER | Atp13a2       | ENSMUSG00000036622 | Transcript        | ENSMUST00000137630 | retained intron         | rs32601055  |
| 4:141002272-141002272 | intron variant,non_coding_trans | MODIFIER | Atp13a2       | ENSMUSG00000036622 | Transcript        | ENSMUST00000151517 | retained intron         | rs32601055  |
| 4:141002272-141002272 | downstream gene variant         | MODIFIER | Atp13a2       | ENSMUSG00000036622 | Transcript        | ENSMUST00000156995 | processed_transcript    | rs32601055  |
| 4:141002272-141002272 | intron_variant                  | MODIFIER | Atp13a2       | ENSMUSG00000036622 | Transcript        | ENSMUST00000168047 | protein_coding          | rs32601055  |
| 4:141002272-141002272 | downstream_gene_variant         | MODIFIER | Atp13a2       | ENSMUSG00000036622 | Transcript        | ENSMUST00000170797 | processed_transcript    | rs32601055  |
| 4:141220516-141220516 | downstream_gene_variant         | MODIFIER | Rsg1          | ENSMUSG00000073733 | Transcript        | ENSMUST00000097813 | protein_coding          | rs258503513 |
| 4:141220516-141220516 | downstream gene variant         | MODIFIER | Rsg1          | ENSMUSG00000073733 | Transcript        | ENSMUST00000125175 | processed transcript    | rs258503513 |
| 4:141220516-141220516 | intron variant,non_coding_trans | MODIFIER | Rsg1          | ENSMUSG00000073733 | Transcript        | ENSMUST00000151475 | processed_transcript    | rs258503513 |
| 4:141458772-141458772 | intron variant                  | MODIFIER | Zbtb17        | ENSMUSG00000006215 | Transcript        | ENSMUST00000006377 | protein_coding          | rs27604143  |
| 4:141458772-141458772 | intron variant,non_coding_trans | MODIFIER | Zbtb17        | ENSMUSG00000006215 | Transcript        | ENSMUST00000142020 | processed_transcript    | rs27604143  |
| 4:141458772-141458772 | intron_variant,non_coding_trans | MODIFIER | Zbtb17        | ENSMUSG00000006215 | Transcript        | ENSMUST00000142438 | processed_transcript    | rs27604143  |
| 4:141458772-141458772 | upstream_gene_variant           | MODIFIER | Zbtb17        | ENSMUSG00000006215 | Transcript        | ENSMUST00000142695 | processed_transcript    | rs27604143  |
| 4:141458772-141458772 | intron_variant,non_coding_trans | MODIFIER | Zbtb17        | ENSMUSG00000006215 | Transcript        | ENSMUST00000144899 | processed_transcript    | rs27604143  |

|                       |                                 |          |          |                    |                   |                    |                          |             |
|-----------------------|---------------------------------|----------|----------|--------------------|-------------------|--------------------|--------------------------|-------------|
| 4:141458772-141458772 | regulatory region variant       | MODIFIER | -        | -                  | RegulatoryFeature | ENSMUSR00000672503 | promoter flanking region | rs27604143  |
| 4:141691929-141691929 | intron_variant                  | MODIFIER | Ddi2     | ENSMUSG00000078515 | Transcript        | ENSMUST00000102484 | protein_coding           | rs27628361  |
| 4:141691929-141691929 | intron_variant                  | MODIFIER | Ddi2     | ENSMUSG00000078515 | Transcript        | ENSMUST00000177592 | protein_coding           | rs27628361  |
| 4:141692756-141692756 | intron_variant                  | MODIFIER | Ddi2     | ENSMUSG00000078515 | Transcript        | ENSMUST00000102484 | protein_coding           | rs3723417   |
| 4:141692756-141692756 | intron variant                  | MODIFIER | Ddi2     | ENSMUSG00000078515 | Transcript        | ENSMUST00000177592 | protein_coding           | rs3723417   |
| 4:141693240-141693240 | intron variant                  | MODIFIER | Ddi2     | ENSMUSG00000078515 | Transcript        | ENSMUST00000102484 | protein_coding           | rs27628354  |
| 4:141693240-141693240 | intron variant                  | MODIFIER | Ddi2     | ENSMUSG00000078515 | Transcript        | ENSMUST00000177592 | protein_coding           | rs27628354  |
| 4:141693282-141693282 | intron_variant                  | MODIFIER | Ddi2     | ENSMUSG00000078515 | Transcript        | ENSMUST00000102484 | protein_coding           | rs27628353  |
| 4:141693282-141693282 | intron_variant                  | MODIFIER | Ddi2     | ENSMUSG00000078515 | Transcript        | ENSMUST00000177592 | protein_coding           | rs27628353  |
| 4:141695254-141695254 | intron_variant                  | MODIFIER | Ddi2     | ENSMUSG00000078515 | Transcript        | ENSMUST00000102484 | protein_coding           | rs33025839  |
| 4:141695254-141695254 | intron variant                  | MODIFIER | Ddi2     | ENSMUSG00000078515 | Transcript        | ENSMUST00000177592 | protein_coding           | rs33025839  |
| 4:141701984-141701985 | intron variant                  | MODIFIER | Ddi2     | ENSMUSG00000078515 | Transcript        | ENSMUST00000102484 | protein_coding           | rs252056708 |
| 4:141701984-141701985 | intron variant                  | MODIFIER | Ddi2     | ENSMUSG00000078515 | Transcript        | ENSMUST00000177592 | protein_coding           | rs252056708 |
| 4:141701989-141701989 | intron variant                  | MODIFIER | Ddi2     | ENSMUSG00000078515 | Transcript        | ENSMUST00000102484 | protein_coding           | rs255958891 |
| 4:141701989-141701989 | intron_variant                  | MODIFIER | Ddi2     | ENSMUSG00000078515 | Transcript        | ENSMUST00000177592 | protein_coding           | rs255958891 |
| 4:141705382-141705382 | intron_variant                  | MODIFIER | Ddi2     | ENSMUSG00000078515 | Transcript        | ENSMUST00000102484 | protein_coding           | rs47015841  |
| 4:141705382-141705382 | intron_variant                  | MODIFIER | Ddi2     | ENSMUSG00000078515 | Transcript        | ENSMUST00000177592 | protein_coding           | rs47015841  |
| 4:141705382-141705382 | regulatory region variant       | MODIFIER | -        | -                  | RegulatoryFeature | ENSMUSR00000672563 | enhancer                 | rs47015841  |
| 4:144921113-144921113 | intron variant,NMD transcript v | MODIFIER | Dhrs3    | ENSMUSG00000066026 | Transcript        | ENSMUST00000084184 | nonsense mediated decay  | rs50406955  |
| 4:144921113-144921113 | intron variant                  | MODIFIER | Dhrs3    | ENSMUSG00000066026 | Transcript        | ENSMUST00000105744 | protein_coding           | rs50406955  |
| 4:144921113-144921113 | downstream_gene_variant         | MODIFIER | Dhrs3    | ENSMUSG00000066026 | Transcript        | ENSMUST00000128926 | processed_transcript     | rs50406955  |
| 4:144921113-144921113 | downstream_gene_variant         | MODIFIER | Dhrs3    | ENSMUSG00000066026 | Transcript        | ENSMUST00000133265 | retained_intron          | rs50406955  |
| 4:144921113-144921113 | downstream_gene_variant         | MODIFIER | Dhrs3    | ENSMUSG00000066026 | Transcript        | ENSMUST00000142808 | protein_coding           | rs50406955  |
| 4:144921113-144921113 | intron variant                  | MODIFIER | Dhrs3    | ENSMUSG00000066026 | Transcript        | ENSMUST00000154208 | protein_coding           | rs50406955  |
| 4:144921113-144921113 | intron variant                  | MODIFIER | Dhrs3    | ENSMUSG00000066026 | Transcript        | ENSMUST00000171001 | protein_coding           | rs50406955  |
| 4:145224184-145224191 | intron variant                  | MODIFIER | Tnfrsf1b | ENSMUSG00000028599 | Transcript        | ENSMUST00000030336 | protein_coding           | -           |
| 4:145224184-145224191 | downstream gene variant         | MODIFIER | Tnfrsf1b | ENSMUSG00000028599 | Transcript        | ENSMUST00000143055 | nonsense mediated decay  | -           |
| 4:145224192-145224194 | intron_variant                  | MODIFIER | Tnfrsf1b | ENSMUSG00000028599 | Transcript        | ENSMUST00000030336 | protein_coding           | -           |
| 4:145224192-145224194 | downstream_gene_variant         | MODIFIER | Tnfrsf1b | ENSMUSG00000028599 | Transcript        | ENSMUST00000143055 | nonsense mediated decay  | -           |
| 4:145292685-145292685 | synonymous variant              | LOW      | Tnfrsf8  | ENSMUSG00000028602 | Transcript        | ENSMUST00000030339 | protein_coding           | rs27627532  |
| 4:145292685-145292685 | synonymous variant,NMD trans    | LOW      | Tnfrsf8  | ENSMUSG00000028602 | Transcript        | ENSMUST00000123027 | nonsense mediated decay  | rs27627532  |
| 4:145292746-145292746 | missense variant                | MODERATE | Tnfrsf8  | ENSMUSG00000028602 | Transcript        | ENSMUST00000030339 | protein_coding           | rs27627530  |
| 4:145292746-145292746 | missense variant,NMD transcrip  | MODERATE | Tnfrsf8  | ENSMUSG00000028602 | Transcript        | ENSMUST00000123027 | nonsense mediated decay  | rs27627530  |
| 4:145294635-145294635 | intron_variant                  | MODIFIER | Tnfrsf8  | ENSMUSG00000028602 | Transcript        | ENSMUST00000030339 | protein_coding           | rs27627519  |
| 4:145294635-145294635 | intron_variant,NMD_transcript_v | MODIFIER | Tnfrsf8  | ENSMUSG00000028602 | Transcript        | ENSMUST00000123027 | nonsense mediated decay  | rs27627519  |
| 4:146270623-146270623 | intron_variant,non_coding_trans | MODIFIER | Gm13166  | ENSMUSG00000085525 | Transcript        | ENSMUST00000124975 | lincRNA                  | -           |
| 4:146270623-146270623 | intron variant,non coding trans | MODIFIER | Gm13166  | ENSMUSG00000085525 | Transcript        | ENSMUST00000144166 | lincRNA                  | -           |
| 4:146270623-146270623 | intron variant,non coding trans | MODIFIER | Gm13166  | ENSMUSG00000085525 | Transcript        | ENSMUST00000146671 | lincRNA                  | -           |
| 4:146270623-146270623 | intron variant,non coding trans | MODIFIER | Gm13166  | ENSMUSG00000085525 | Transcript        | ENSMUST00000154592 | lincRNA                  | -           |
| 4:146270623-146270623 | intron variant,non coding trans | MODIFIER | Gm26573  | ENSMUSG00000096958 | Transcript        | ENSMUST00000181199 | lincRNA                  | -           |
| 4:146270623-146270623 | regulatory_region_variant       | MODIFIER | -        | -                  | RegulatoryFeature | ENSMUSR00000202689 | promoter                 | -           |
| 4:146449070-146449070 | 5_prime_UTR_variant             | MODIFIER | Zfp992   | ENSMUSG00000070605 | Transcript        | ENSMUST00000105733 | protein_coding           | rs581062421 |
| 4:146449070-146449070 | intron_variant,non_coding_trans | MODIFIER | Gm26573  | ENSMUSG00000096958 | Transcript        | ENSMUST00000181199 | lincRNA                  | rs581062421 |
| 4:146449070-146449070 | regulatory region variant       | MODIFIER | -        | -                  | RegulatoryFeature | ENSMUSR00000673138 | open chromatin region    | rs581062421 |
| 4:146454614-146454614 | intron variant                  | MODIFIER | Zfp992   | ENSMUSG00000070605 | Transcript        | ENSMUST00000105733 | protein_coding           | rs27631291  |
| 4:146454614-146454614 | intron variant,non coding trans | MODIFIER | Gm26573  | ENSMUSG00000096958 | Transcript        | ENSMUST00000181199 | lincRNA                  | rs27631291  |
| 4:146454621-146454621 | intron_variant                  | MODIFIER | Zfp992   | ENSMUSG00000070605 | Transcript        | ENSMUST00000105733 | protein_coding           | rs51742464  |
| 4:146454621-146454621 | intron_variant,non_coding_trans | MODIFIER | Gm26573  | ENSMUSG00000096958 | Transcript        | ENSMUST00000181199 | lincRNA                  | rs51742464  |
| 4:146456889-146456891 | intron_variant                  | MODIFIER | Zfp992   | ENSMUSG00000070605 | Transcript        | ENSMUST00000105733 | protein_coding           | -           |
| 4:146456889-146456891 | intron variant,non coding trans | MODIFIER | Gm26573  | ENSMUSG00000096958 | Transcript        | ENSMUST00000181199 | lincRNA                  | -           |
| 4:146456894-146456894 | intron variant                  | MODIFIER | Zfp992   | ENSMUSG00000070605 | Transcript        | ENSMUST00000105733 | protein_coding           | -           |
| 4:146456894-146456894 | intron variant,non coding trans | MODIFIER | Gm26573  | ENSMUSG00000096958 | Transcript        | ENSMUST00000181199 | lincRNA                  | -           |
| 4:146910781-146910781 | upstream gene variant           | MODIFIER | Gm21411  | ENSMUSG00000045699 | Transcript        | ENSMUST00000049821 | protein_coding           | rs581273409 |
| 4:146910781-146910781 | intron_variant,non_coding_trans | MODIFIER | Gm26573  | ENSMUSG00000096958 | Transcript        | ENSMUST00000181199 | lincRNA                  | rs581273409 |
| 4:146920723-146920723 | intron_variant,non_coding_trans | MODIFIER | Gm26573  | ENSMUSG00000096958 | Transcript        | ENSMUST00000181199 | lincRNA                  | rs46653047  |
| 4:148016271-148016273 | intron_variant                  | MODIFIER | C1cn6    | ENSMUSG00000029016 | Transcript        | ENSMUST00000030879 | protein_coding           | rs223740081 |
| 4:148016271-148016273 | intron variant,NMD transcript v | MODIFIER | C1cn6    | ENSMUSG00000029016 | Transcript        | ENSMUST00000105711 | nonsense mediated decay  | rs223740081 |
| 4:148016271-148016273 | intron variant                  | MODIFIER | C1cn6    | ENSMUSG00000029016 | Transcript        | ENSMUST00000137724 | protein_coding           | rs223740081 |
| 4:148143664-148143664 | downstream gene variant         | MODIFIER | Fbxo6    | ENSMUSG00000055401 | Transcript        | ENSMUST00000030858 | protein_coding           | rs31808429  |
| 4:148143664-148143664 | intron_variant                  | MODIFIER | Mad2l2   | ENSMUSG00000029003 | Transcript        | ENSMUST00000030860 | protein_coding           | rs31808429  |
| 4:148143664-148143664 | downstream_gene_variant         | MODIFIER | Fbxo6    | ENSMUSG00000055401 | Transcript        | ENSMUST00000056965 | protein_coding           | rs31808429  |
| 4:148143664-148143664 | intron_variant                  | MODIFIER | Mad2l2   | ENSMUSG00000029003 | Transcript        | ENSMUST00000084129 | protein_coding           | rs31808429  |
| 4:148143664-148143664 | downstream gene variant         | MODIFIER | Fbxo6    | ENSMUSG00000055401 | Transcript        | ENSMUST00000105706 | protein_coding           | rs31808429  |
| 4:148143664-148143664 | intron variant                  | MODIFIER | Mad2l2   | ENSMUSG00000029003 | Transcript        | ENSMUST00000105707 | protein_coding           | rs31808429  |
| 4:148143664-148143664 | upstream gene variant           | MODIFIER | Mad2l2   | ENSMUSG00000029003 | Transcript        | ENSMUST00000105708 | retained_intron          | rs31808429  |
| 4:148143664-148143664 | downstream gene variant         | MODIFIER | Mad2l2   | ENSMUSG00000029003 | Transcript        | ENSMUST00000126261 | processed transcript     | rs31808429  |
| 4:148143664-148143664 | downstream_gene_variant         | MODIFIER | Fbxo6    | ENSMUSG00000055401 | Transcript        | ENSMUST00000126615 | protein_coding           | rs31808429  |
| 4:148143664-148143664 | intron_variant                  | MODIFIER | Mad2l2   | ENSMUSG00000029003 | Transcript        | ENSMUST00000132698 | protein_coding           | rs31808429  |
| 4:148143664-148143664 | downstream_gene_variant         | MODIFIER | Fbxo6    | ENSMUSG00000055401 | Transcript        | ENSMUST00000134261 | protein_coding           | rs31808429  |

|                       |                                         |          |         |                    |                   |                     |                         |             |
|-----------------------|-----------------------------------------|----------|---------|--------------------|-------------------|---------------------|-------------------------|-------------|
| 4:148143664-148143664 | intronic variant                        | MODIFIER | Mad2l2  | ENSMUSG00000029003 | Transcript        | ENSMUST00000140049  | protein coding          | rs31808429  |
| 4:148143664-148143664 | downstream_gene_variant                 | MODIFIER | Mad2l2  | ENSMUSG00000029003 | Transcript        | ENSMUST00000148742  | retained_intron         | rs31808429  |
| 4:148143664-148143664 | downstream_gene_variant                 | MODIFIER | Fbxo6   | ENSMUSG00000055401 | Transcript        | ENSMUST00000152098  | protein_coding          | rs31808429  |
| 4:148143664-148143664 | downstream_gene_variant                 | MODIFIER | Fbxo6   | ENSMUSG00000055401 | Transcript        | ENSMUST00000168503  | protein_coding          | rs31808429  |
| 4:148143664-148143664 | downstream_gene_variant                 | MODIFIER | Mir7022 | ENSMUSG00000099043 | Transcript        | ENSMUST00000183749  | miRNA                   | rs31808429  |
| 4:148144812-148144812 | downstream_gene_variant                 | MODIFIER | Fbxo6   | ENSMUSG00000055401 | Transcript        | ENSMUST00000030858  | protein_coding          | rs27602010  |
| 4:148144812-148144812 | intronic variant                        | MODIFIER | Mad2l2  | ENSMUSG00000029003 | Transcript        | ENSMUST00000030860  | protein_coding          | rs27602010  |
| 4:148144812-148144812 | downstream_gene_variant                 | MODIFIER | Fbxo6   | ENSMUSG00000055401 | Transcript        | ENSMUST00000056965  | protein_coding          | rs27602010  |
| 4:148144812-148144812 | intronic variant                        | MODIFIER | Mad2l2  | ENSMUSG00000029003 | Transcript        | ENSMUST00000084129  | protein_coding          | rs27602010  |
| 4:148144812-148144812 | downstream_gene_variant                 | MODIFIER | Fbxo6   | ENSMUSG00000055401 | Transcript        | ENSMUST00000105706  | protein_coding          | rs27602010  |
| 4:148144812-148144812 | intronic variant                        | MODIFIER | Mad2l2  | ENSMUSG00000029003 | Transcript        | ENSMUST00000105707  | protein_coding          | rs27602010  |
| 4:148144812-148144812 | non coding transcript exon variant      | MODIFIER | Mad2l2  | ENSMUSG00000029003 | Transcript        | ENSMUST00000105708  | retained_intron         | rs27602010  |
| 4:148144812-148144812 | downstream_gene_variant                 | MODIFIER | Mad2l2  | ENSMUSG00000029003 | Transcript        | ENSMUST00000126261  | processed_transcript    | rs27602010  |
| 4:148144812-148144812 | downstream_gene_variant                 | MODIFIER | Fbxo6   | ENSMUSG00000055401 | Transcript        | ENSMUST00000126615  | protein_coding          | rs27602010  |
| 4:148144812-148144812 | downstream_gene_variant                 | MODIFIER | Fbxo6   | ENSMUSG00000055401 | Transcript        | ENSMUST00000132083  | protein_coding          | rs27602010  |
| 4:148144812-148144812 | intronic variant                        | MODIFIER | Mad2l2  | ENSMUSG00000029003 | Transcript        | ENSMUST00000132698  | protein_coding          | rs27602010  |
| 4:148144812-148144812 | downstream_gene_variant                 | MODIFIER | Fbxo6   | ENSMUSG00000055401 | Transcript        | ENSMUST00000134261  | protein_coding          | rs27602010  |
| 4:148144812-148144812 | intronic variant                        | MODIFIER | Mad2l2  | ENSMUSG00000029003 | Transcript        | ENSMUST00000140049  | protein_coding          | rs27602010  |
| 4:148144812-148144812 | downstream_gene_variant                 | MODIFIER | Mad2l2  | ENSMUSG00000029003 | Transcript        | ENSMUST00000148742  | retained_intron         | rs27602010  |
| 4:148144812-148144812 | downstream_gene_variant                 | MODIFIER | Fbxo6   | ENSMUSG00000055401 | Transcript        | ENSMUST00000152098  | protein_coding          | rs27602010  |
| 4:148144812-148144812 | downstream_gene_variant                 | MODIFIER | Fbxo6   | ENSMUSG00000055401 | Transcript        | ENSMUST00000168503  | protein_coding          | rs27602010  |
| 4:148144812-148144812 | downstream_gene_variant                 | MODIFIER | Mir7022 | ENSMUSG00000099043 | Transcript        | ENSMUST00000183749  | miRNA                   | rs27602010  |
| 4:148574509-148574509 | intronic variant                        | MODIFIER | Exosc10 | ENSMUSG00000017264 | Transcript        | ENSMUST00000017408  | protein_coding          | rs3167265   |
| 4:148574509-148574509 | intronic variant                        | MODIFIER | Exosc10 | ENSMUSG00000017264 | Transcript        | ENSMUST00000076022  | protein_coding          | rs3167265   |
| 4:148574509-148574509 | intronic variant,NMD transcript variant | MODIFIER | Exosc10 | ENSMUSG00000017264 | Transcript        | ENSMUST00000097781  | nonsense mediated decay | rs3167265   |
| 4:148574509-148574509 | upstream gene variant                   | MODIFIER | Gm13204 | ENSMUSG00000082860 | Transcript        | ENSMUST00000120110  | processed_pseudogene    | rs3167265   |
| 4:148574509-148574509 | intronic variant,non coding transcript  | MODIFIER | Exosc10 | ENSMUSG00000017264 | Transcript        | ENSMUST00000126897  | retained_intron         | rs3167265   |
| 4:148574509-148574509 | intronic variant,non coding transcript  | MODIFIER | Exosc10 | ENSMUSG00000017264 | Transcript        | ENSMUST00000173154  | processed_transcript    | rs3167265   |
| 4:148574509-148574509 | intronic variant,non coding transcript  | MODIFIER | Exosc10 | ENSMUSG00000017264 | Transcript        | ENSMUST00000173767  | retained_intron         | rs3167265   |
| 4:148574509-148574509 | upstream_gene_variant                   | MODIFIER | Exosc10 | ENSMUSG00000017264 | Transcript        | ENSMUST00000173892  | processed_transcript    | rs3167265   |
| 4:148595000-148595000 | downstream_gene_variant                 | MODIFIER | Srm     | ENSMUSG00000006442 | Transcript        | ENSMUST00000006611  | protein_coding          | rs3165450   |
| 4:148595000-148595000 | downstream_gene_variant                 | MODIFIER | Srm     | ENSMUSG00000006442 | Transcript        | ENSMUST00000140129  | processed_transcript    | rs3165450   |
| 4:148595000-148595000 | downstream_gene_variant                 | MODIFIER | Srm     | ENSMUSG00000006442 | Transcript        | ENSMUST00000152701  | retained_intron         | rs3165450   |
| 4:148595000-148595000 | regulatory_region_variant               | MODIFIER | -       | -                  | RegulatoryFeature | ENSMUSR000000673487 | open_chromatin_region   | rs3165450   |
| 4:149653666-149653666 | intronic variant                        | MODIFIER | Pik3cd  | ENSMUSG00000039936 | Transcript        | ENSMUST00000038859  | protein_coding          | rs49908256  |
| 4:149653666-149653666 | intronic variant                        | MODIFIER | Pik3cd  | ENSMUSG00000039936 | Transcript        | ENSMUST00000105688  | protein_coding          | rs49908256  |
| 4:149653666-149653666 | intronic variant                        | MODIFIER | Pik3cd  | ENSMUSG00000039936 | Transcript        | ENSMUST00000105689  | protein_coding          | rs49908256  |
| 4:149653666-149653666 | intronic variant                        | MODIFIER | Pik3cd  | ENSMUSG00000039936 | Transcript        | ENSMUST00000105690  | protein_coding          | rs49908256  |
| 4:149653666-149653666 | downstream_gene_variant                 | MODIFIER | Clstn1  | ENSMUSG00000039953 | Transcript        | ENSMUST00000105691  | protein_coding          | rs49908256  |
| 4:149653666-149653666 | intronic variant                        | MODIFIER | Pik3cd  | ENSMUSG00000039936 | Transcript        | ENSMUST00000118704  | protein_coding          | rs49908256  |
| 4:149653666-149653666 | intronic variant                        | MODIFIER | Pik3cd  | ENSMUSG00000039936 | Transcript        | ENSMUST00000122059  | protein_coding          | rs49908256  |
| 4:149653666-149653666 | intronic variant                        | MODIFIER | Pik3cd  | ENSMUSG00000039936 | Transcript        | ENSMUST00000177654  | protein_coding          | rs49908256  |
| 4:149653666-149653666 | downstream_gene_variant                 | MODIFIER | Mir7023 | ENSMUSG00000098580 | Transcript        | ENSMUST00000185093  | miRNA                   | rs49908256  |
| 4:149653666-149653666 | regulatory_region_variant               | MODIFIER | -       | -                  | RegulatoryFeature | ENSMUSR000000673786 | open_chromatin_region   | rs49908256  |
| 4:149657626-149657626 | intronic variant                        | MODIFIER | Pik3cd  | ENSMUSG00000039936 | Transcript        | ENSMUST00000038859  | protein_coding          | rs578548868 |
| 4:149657626-149657626 | intronic variant                        | MODIFIER | Pik3cd  | ENSMUSG00000039936 | Transcript        | ENSMUST00000105688  | protein_coding          | rs578548868 |
| 4:149657626-149657626 | intronic variant                        | MODIFIER | Pik3cd  | ENSMUSG00000039936 | Transcript        | ENSMUST00000105689  | protein_coding          | rs578548868 |
| 4:149657626-149657626 | intronic variant                        | MODIFIER | Pik3cd  | ENSMUSG00000039936 | Transcript        | ENSMUST00000105690  | protein_coding          | rs578548868 |
| 4:149657626-149657626 | intronic variant                        | MODIFIER | Pik3cd  | ENSMUSG00000039936 | Transcript        | ENSMUST00000118704  | protein_coding          | rs578548868 |
| 4:149657626-149657626 | intronic variant                        | MODIFIER | Pik3cd  | ENSMUSG00000039936 | Transcript        | ENSMUST00000122059  | protein_coding          | rs578548868 |
| 4:149657626-149657626 | downstream_gene_variant                 | MODIFIER | Pik3cd  | ENSMUSG00000039936 | Transcript        | ENSMUST00000127273  | protein_coding          | rs578548868 |
| 4:149657626-149657626 | downstream_gene_variant                 | MODIFIER | Pik3cd  | ENSMUSG00000039936 | Transcript        | ENSMUST00000131224  | protein_coding          | rs578548868 |
| 4:149657626-149657626 | downstream_gene_variant                 | MODIFIER | Pik3cd  | ENSMUSG00000039936 | Transcript        | ENSMUST00000134534  | protein_coding          | rs578548868 |
| 4:149657626-149657626 | downstream_gene_variant                 | MODIFIER | Pik3cd  | ENSMUSG00000039936 | Transcript        | ENSMUST00000146612  | protein_coding          | rs578548868 |
| 4:149657626-149657626 | intronic variant                        | MODIFIER | Pik3cd  | ENSMUSG00000039936 | Transcript        | ENSMUST00000177654  | protein_coding          | rs578548868 |
| 4:149657626-149657626 | upstream_gene_variant                   | MODIFIER | Mir7023 | ENSMUSG00000098580 | Transcript        | ENSMUST00000185093  | miRNA                   | rs578548868 |
| 4:150241780-150241780 | upstream_gene_variant                   | MODIFIER | Eno1    | ENSMUSG00000063524 | Transcript        | ENSMUST00000080149  | protein_coding          | rs32669891  |
| 4:150241780-150241780 | intronic variant                        | MODIFIER | Eno1    | ENSMUSG00000063524 | Transcript        | ENSMUST00000080926  | protein_coding          | rs32669891  |
| 4:150241780-150241780 | non coding transcript exon variant      | MODIFIER | Eno1    | ENSMUSG00000063524 | Transcript        | ENSMUST00000130632  | retained_intron         | rs32669891  |
| 4:150241780-150241780 | upstream_gene_variant                   | MODIFIER | Eno1    | ENSMUSG00000063524 | Transcript        | ENSMUST00000133789  | retained_intron         | rs32669891  |
| 4:150241780-150241780 | synonymous_variant                      | LOW      | Eno1    | ENSMUSG00000063524 | Transcript        | ENSMUST00000133839  | protein_coding          | rs32669891  |
| 4:150241780-150241780 | upstream_gene_variant                   | MODIFIER | Eno1    | ENSMUSG00000063524 | Transcript        | ENSMUST00000135063  | retained_intron         | rs32669891  |
| 4:150241780-150241780 | intronic variant                        | MODIFIER | Eno1    | ENSMUSG00000063524 | Transcript        | ENSMUST00000141931  | protein_coding          | rs32669891  |
| 4:150241780-150241780 | downstream_gene_variant                 | MODIFIER | Eno1    | ENSMUSG00000063524 | Transcript        | ENSMUST00000148605  | retained_intron         | rs32669891  |
| 4:150241780-150241780 | intronic variant                        | MODIFIER | Eno1    | ENSMUSG00000063524 | Transcript        | ENSMUST00000150175  | protein_coding          | rs32669891  |
| 4:150902322-150902322 | intronic variant                        | MODIFIER | Park7   | ENSMUSG00000028964 | Transcript        | ENSMUST00000030805  | protein_coding          | rs32718258  |
| 4:150902322-150902322 | intronic variant                        | MODIFIER | Park7   | ENSMUSG00000028964 | Transcript        | ENSMUST00000105673  | protein_coding          | rs32718258  |
| 4:150902322-150902322 | intronic variant                        | MODIFIER | Park7   | ENSMUSG00000028964 | Transcript        | ENSMUST00000105674  | protein_coding          | rs32718258  |
| 4:150902322-150902322 | intronic variant                        | MODIFIER | Park7   | ENSMUSG00000028964 | Transcript        | ENSMUST00000105675  | protein_coding          | rs32718258  |

|                       |                                 |          |          |                    |                   |                    |                          |             |
|-----------------------|---------------------------------|----------|----------|--------------------|-------------------|--------------------|--------------------------|-------------|
| 4:150902322-150902322 | intron variant                  | MODIFIER | Park7    | ENSMUSG00000028964 | Transcript        | ENSMUST00000105676 | protein coding           | rs32718258  |
| 4:150902322-150902322 | intron_variant                  | MODIFIER | Park7    | ENSMUSG00000028964 | Transcript        | ENSMUST00000128075 | protein_coding           | rs32718258  |
| 4:150902322-150902322 | upstream_gene_variant           | MODIFIER | Park7    | ENSMUSG00000028964 | Transcript        | ENSMUST00000132265 | processed_transcript     | rs32718258  |
| 4:150902322-150902322 | downstream_gene_variant         | MODIFIER | Park7    | ENSMUSG00000028964 | Transcript        | ENSMUST00000134751 | protein_coding           | rs32718258  |
| 4:150902322-150902322 | downstream gene variant         | MODIFIER | Park7    | ENSMUSG00000028964 | Transcript        | ENSMUST00000146184 | protein coding           | rs32718258  |
| 4:150902322-150902322 | downstream gene variant         | MODIFIER | Park7    | ENSMUSG00000028964 | Transcript        | ENSMUST00000148626 | retained intron          | rs32718258  |
| 4:150902322-150902322 | regulatory region variant       | MODIFIER | -        | -                  | RegulatoryFeature | ENSMUSR00000419371 | promoter flanking region | rs32718258  |
| 4:151055494-151055494 | intron_variant                  | MODIFIER | Vamp3    | ENSMUSG00000028955 | Transcript        | ENSMUST00000030797 | protein_coding           | rs32739749  |
| 4:151055494-151055494 | downstream_gene_variant         | MODIFIER | Camta1   | ENSMUSG00000014592 | Transcript        | ENSMUST00000049790 | protein_coding           | rs32739749  |
| 4:151055494-151055494 | downstream_gene_variant         | MODIFIER | Camta1   | ENSMUSG00000014592 | Transcript        | ENSMUST00000097774 | protein_coding           | rs32739749  |
| 4:151055494-151055494 | downstream gene variant         | MODIFIER | Camta1   | ENSMUSG00000014592 | Transcript        | ENSMUST00000105668 | protein coding           | rs32739749  |
| 4:151055494-151055494 | downstream gene variant         | MODIFIER | Camta1   | ENSMUSG00000014592 | Transcript        | ENSMUST00000105670 | protein coding           | rs32739749  |
| 4:151055494-151055494 | downstream gene variant         | MODIFIER | Vamp3    | ENSMUSG00000028955 | Transcript        | ENSMUST00000125205 | retained intron          | rs32739749  |
| 4:151055494-151055494 | downstream gene variant         | MODIFIER | Camta1   | ENSMUSG00000014592 | Transcript        | ENSMUST00000140030 | protein coding           | rs32739749  |
| 4:151055494-151055494 | intron_variant,non_coding_trans | MODIFIER | Vamp3    | ENSMUSG00000028955 | Transcript        | ENSMUST00000155446 | retained_intron          | rs32739749  |
| 4:151055494-151055494 | intron_variant                  | MODIFIER | Camta1   | ENSMUSG00000014592 | Transcript        | ENSMUST00000169423 | protein_coding           | rs32739749  |
| 4:151055494-151055494 | regulatory_region_variant       | MODIFIER | -        | -                  | RegulatoryFeature | ENSMUSR00000674161 | enhancer                 | rs32739749  |
| 4:151985433-151985433 | intron variant                  | MODIFIER | Thap3    | ENSMUSG00000039759 | Transcript        | ENSMUST00000036680 | protein coding           | rs227156016 |
| 4:151985433-151985433 | downstream gene variant         | MODIFIER | Phf13    | ENSMUSG00000047777 | Transcript        | ENSMUST00000055688 | protein coding           | rs227156016 |
| 4:151985433-151985433 | downstream gene variant         | MODIFIER | Dnajc11  | ENSMUSG00000039768 | Transcript        | ENSMUST00000062904 | protein coding           | rs227156016 |
| 4:151985433-151985433 | intron_variant                  | MODIFIER | Thap3    | ENSMUSG00000039759 | Transcript        | ENSMUST00000105665 | protein_coding           | rs227156016 |
| 4:151985433-151985433 | downstream_gene_variant         | MODIFIER | Dnajc11  | ENSMUSG00000039768 | Transcript        | ENSMUST00000124955 | retained_intron          | rs227156016 |
| 4:151985433-151985433 | downstream_gene_variant         | MODIFIER | Dnajc11  | ENSMUSG00000039768 | Transcript        | ENSMUST00000128582 | retained_intron          | rs227156016 |
| 4:151985433-151985433 | downstream gene variant         | MODIFIER | Dnajc11  | ENSMUSG00000039768 | Transcript        | ENSMUST00000139069 | nonsense mediated decay  | rs227156016 |
| 4:151985433-151985433 | downstream gene variant         | MODIFIER | Thap3    | ENSMUSG00000039759 | Transcript        | ENSMUST00000146471 | retained intron          | rs227156016 |
| 4:151985433-151985433 | downstream gene variant         | MODIFIER | Dnajc11  | ENSMUSG00000039768 | Transcript        | ENSMUST00000149337 | retained intron          | rs227156016 |
| 4:151987335-151987335 | intron variant                  | MODIFIER | Thap3    | ENSMUSG00000039759 | Transcript        | ENSMUST00000036680 | protein coding           | rs228896315 |
| 4:151987335-151987335 | downstream_gene_variant         | MODIFIER | Phf13    | ENSMUSG00000047777 | Transcript        | ENSMUST00000055688 | protein_coding           | rs228896315 |
| 4:151987335-151987335 | intron_variant                  | MODIFIER | Thap3    | ENSMUSG00000039759 | Transcript        | ENSMUST00000105665 | protein_coding           | rs228896315 |
| 4:151987335-151987335 | intron_variant,non_coding_trans | MODIFIER | Thap3    | ENSMUSG00000039759 | Transcript        | ENSMUST00000146471 | retained_intron          | rs228896315 |
| 4:152023620-152023620 | downstream gene variant         | MODIFIER | Tas1r1   | ENSMUSG00000028950 | Transcript        | ENSMUST00000030792 | protein coding           | rs47862982  |
| 4:152023620-152023620 | intron variant                  | MODIFIER | Zbtb48   | ENSMUSG00000028952 | Transcript        | ENSMUST00000066715 | protein coding           | rs47862982  |
| 4:152023620-152023620 | intron variant,non coding_trans | MODIFIER | Zbtb48   | ENSMUSG00000028952 | Transcript        | ENSMUST00000123696 | retained intron          | rs47862982  |
| 4:152023620-152023620 | downstream_gene_variant         | MODIFIER | Zbtb48   | ENSMUSG00000028952 | Transcript        | ENSMUST00000131935 | protein_coding           | rs47862982  |
| 4:152023620-152023620 | upstream_gene_variant           | MODIFIER | Zbtb48   | ENSMUSG00000028952 | Transcript        | ENSMUST00000136212 | processed_transcript     | rs47862982  |
| 4:152023620-152023620 | upstream_gene_variant           | MODIFIER | Zbtb48   | ENSMUSG00000028952 | Transcript        | ENSMUST00000147895 | processed_transcript     | rs47862982  |
| 4:152023620-152023620 | intron variant,NMD transcript v | MODIFIER | Zbtb48   | ENSMUSG00000028952 | Transcript        | ENSMUST00000155389 | nonsense mediated decay  | rs47862982  |
| 4:152023620-152023620 | intron variant,non coding_trans | MODIFIER | Zbtb48   | ENSMUSG00000028952 | Transcript        | ENSMUST00000155441 | retained intron          | rs47862982  |
| 4:152023620-152023620 | intron variant,NMD transcript v | MODIFIER | Zbtb48   | ENSMUSG00000028952 | Transcript        | ENSMUST00000156748 | nonsense mediated decay  | rs47862982  |
| 4:152032080-152032080 | synonymous variant              | LOW      | Tas1r1   | ENSMUSG00000028950 | Transcript        | ENSMUST00000030792 | protein coding           | rs31834980  |
| 4:152032080-152032080 | upstream_gene_variant           | MODIFIER | Zbtb48   | ENSMUSG00000028952 | Transcript        | ENSMUST00000066715 | protein_coding           | rs31834980  |
| 4:152032080-152032080 | upstream_gene_variant           | MODIFIER | Zbtb48   | ENSMUSG00000028952 | Transcript        | ENSMUST00000123696 | retained_intron          | rs31834980  |
| 4:152032080-152032080 | upstream_gene_variant           | MODIFIER | Zbtb48   | ENSMUSG00000028952 | Transcript        | ENSMUST00000131935 | protein_coding           | rs31834980  |
| 4:152032080-152032080 | upstream gene variant           | MODIFIER | Zbtb48   | ENSMUSG00000028952 | Transcript        | ENSMUST00000155389 | nonsense mediated decay  | rs31834980  |
| 4:152112641-152112641 | upstream gene variant           | MODIFIER | Tnfrsf25 | ENSMUSG00000024793 | Transcript        | ENSMUST00000025706 | protein coding           | rs32693222  |
| 4:152112641-152112641 | upstream gene variant           | MODIFIER | Tnfrsf25 | ENSMUSG00000024793 | Transcript        | ENSMUST00000035275 | protein coding           | rs32693222  |
| 4:152112641-152112641 | synonymous_variant              | LOW      | Plekhh5  | ENSMUSG00000039713 | Transcript        | ENSMUST00000084115 | protein_coding           | rs32693222  |
| 4:152112641-152112641 | synonymous_variant              | LOW      | Plekhh5  | ENSMUSG00000039713 | Transcript        | ENSMUST00000105661 | protein_coding           | rs32693222  |
| 4:152112641-152112641 | synonymous_variant              | LOW      | Plekhh5  | ENSMUSG00000039713 | Transcript        | ENSMUST00000105662 | protein_coding           | rs32693222  |
| 4:152112641-152112641 | synonymous variant              | LOW      | Plekhh5  | ENSMUSG00000039713 | Transcript        | ENSMUST00000118648 | protein coding           | rs32693222  |
| 4:152112641-152112641 | upstream gene variant           | MODIFIER | Tnfrsf25 | ENSMUSG00000024793 | Transcript        | ENSMUST00000127111 | processed transcript     | rs32693222  |
| 4:152112641-152112641 | non coding transcript exon var  | MODIFIER | Plekhh5  | ENSMUSG00000039713 | Transcript        | ENSMUST00000140085 | retained intron          | rs32693222  |
| 4:152112641-152112641 | downstream gene variant         | MODIFIER | Plekhh5  | ENSMUSG00000039713 | Transcript        | ENSMUST00000142412 | retained intron          | rs32693222  |
| 4:152270058-152270059 | intron_variant                  | MODIFIER | Aco17    | ENSMUSG00000028937 | Transcript        | ENSMUST00000030779 | protein_coding           | rs214782755 |
| 4:152270058-152270059 | intron_variant                  | MODIFIER | Aco17    | ENSMUSG00000028937 | Transcript        | ENSMUST00000075363 | protein_coding           | rs214782755 |
| 4:152270058-152270059 | upstream_gene_variant           | MODIFIER | Gpr153   | ENSMUSG00000042804 | Transcript        | ENSMUST00000105650 | protein_coding           | rs214782755 |
| 4:152270058-152270059 | upstream gene variant           | MODIFIER | Gpr153   | ENSMUSG00000042804 | Transcript        | ENSMUST00000105651 | protein coding           | rs214782755 |
| 4:152270058-152270059 | intron variant                  | MODIFIER | Aco17    | ENSMUSG00000028937 | Transcript        | ENSMUST00000105652 | protein coding           | rs214782755 |
| 4:152270058-152270059 | intron variant                  | MODIFIER | Aco17    | ENSMUSG00000028937 | Transcript        | ENSMUST00000167926 | protein coding           | rs214782755 |
| 4:152270058-152270059 | intron_variant                  | MODIFIER | Aco17    | ENSMUSG00000028937 | Transcript        | ENSMUST00000030779 | protein_coding           | rs32261663  |
| 4:152270095-152270095 | intron_variant                  | MODIFIER | Aco17    | ENSMUSG00000028937 | Transcript        | ENSMUST00000075363 | protein_coding           | rs32261663  |
| 4:152270095-152270095 | upstream_gene_variant           | MODIFIER | Gpr153   | ENSMUSG00000042804 | Transcript        | ENSMUST00000105650 | protein_coding           | rs32261663  |
| 4:152270095-152270095 | upstream gene variant           | MODIFIER | Gpr153   | ENSMUSG00000042804 | Transcript        | ENSMUST00000105651 | protein coding           | rs32261663  |
| 4:152270095-152270095 | intron variant                  | MODIFIER | Aco17    | ENSMUSG00000028937 | Transcript        | ENSMUST00000105652 | protein coding           | rs32261663  |
| 4:152270095-152270095 | intron variant                  | MODIFIER | Aco17    | ENSMUSG00000028937 | Transcript        | ENSMUST00000167926 | protein coding           | rs32261663  |
| 4:152270109-152270109 | intron variant                  | MODIFIER | Aco17    | ENSMUSG00000028937 | Transcript        | ENSMUST00000030779 | protein coding           | rs32146192  |
| 4:152270109-152270109 | intron_variant                  | MODIFIER | Aco17    | ENSMUSG00000028937 | Transcript        | ENSMUST00000075363 | protein_coding           | rs32146192  |
| 4:152270109-152270109 | upstream_gene_variant           | MODIFIER | Gpr153   | ENSMUSG00000042804 | Transcript        | ENSMUST00000105650 | protein_coding           | rs32146192  |
| 4:152270109-152270109 | upstream_gene_variant           | MODIFIER | Gpr153   | ENSMUSG00000042804 | Transcript        | ENSMUST00000105651 | protein_coding           | rs32146192  |





|                       |                                   |          |          |                     |                   |                    |                         |            |
|-----------------------|-----------------------------------|----------|----------|---------------------|-------------------|--------------------|-------------------------|------------|
| 4:154932691-154932691 | upstream gene variant             | MODIFIER | Tnfrsf14 | ENSMUSG00000042333  | Transcript        | ENSMUST00000137803 | protein coding          | rs32199916 |
| 4:154932691-154932691 | upstream_gene_variant             | MODIFIER | Tnfrsf14 | ENSMUSG00000042333  | Transcript        | ENSMUST00000145296 | protein_coding          | rs32199916 |
| 4:154932691-154932691 | upstream_gene_variant             | MODIFIER | Tnfrsf14 | ENSMUSG00000042333  | Transcript        | ENSMUST00000152687 | protein_coding          | rs32199916 |
| 4:154932691-154932691 | upstream_gene_variant             | MODIFIER | Tnfrsf14 | ENSMUSG00000042333  | Transcript        | ENSMUST00000219534 | protein_coding          | rs32199916 |
| 4:155252456-155252456 | intron variant                    | MODIFIER | Faap20   | ENSMUSG000000073684 | Transcript        | ENSMUST00000097747 | protein coding          | rs49915416 |
| 4:155252456-155252456 | intron variant                    | MODIFIER | Faap20   | ENSMUSG000000073684 | Transcript        | ENSMUST00000105627 | protein coding          | rs49915416 |
| 4:155252456-155252456 | downstream gene variant           | MODIFIER | Faap20   | ENSMUSG000000073684 | Transcript        | ENSMUST00000122957 | processed transcript    | rs49915416 |
| 4:155252456-155252456 | downstream_gene_variant           | MODIFIER | Faap20   | ENSMUSG000000073684 | Transcript        | ENSMUST00000126713 | processed_transcript    | rs49915416 |
| 4:155252456-155252456 | intron_variant,non_coding_trans   | MODIFIER | Faap20   | ENSMUSG000000073684 | Transcript        | ENSMUST00000126803 | processed_transcript    | rs49915416 |
| 4:155252456-155252456 | intron_variant                    | MODIFIER | Faap20   | ENSMUSG000000073684 | Transcript        | ENSMUST00000143709 | protein_coding          | rs49915416 |
| 4:155252456-155252456 | intron variant,NMD transcript v   | MODIFIER | Faap20   | ENSMUSG000000073684 | Transcript        | ENSMUST00000148406 | nonsense mediated decay | rs49915416 |
| 4:155252456-155252456 | intron variant,non coding trans   | MODIFIER | Faap20   | ENSMUSG000000073684 | Transcript        | ENSMUST00000149468 | processed transcript    | rs49915416 |
| 4:155252456-155252456 | intron variant,non coding trans   | MODIFIER | Faap20   | ENSMUSG000000073684 | Transcript        | ENSMUST00000156404 | retained intron         | rs49915416 |
| 4:155252456-155252456 | intron variant                    | MODIFIER | Faap20   | ENSMUSG000000073684 | Transcript        | ENSMUST00000178473 | protein coding          | rs49915416 |
| 4:155805545-155805545 | intron_variant                    | MODIFIER | Mrp120   | ENSMUSG00000029066  | Transcript        | ENSMUST00000030942 | protein_coding          | rs49908734 |
| 4:155805545-155805545 | intron_variant                    | MODIFIER | Mrp120   | ENSMUSG00000029066  | Transcript        | ENSMUST00000130188 | protein_coding          | rs49908734 |
| 4:155805545-155805545 | intron_variant,NMD_transcript_v   | MODIFIER | Mrp120   | ENSMUSG00000029066  | Transcript        | ENSMUST00000137487 | nonsense mediated decay | rs49908734 |
| 4:155805545-155805545 | intron variant,non coding trans   | MODIFIER | Mrp120   | ENSMUSG00000029066  | Transcript        | ENSMUST00000143503 | processed transcript    | rs49908734 |
| 4:155805545-155805545 | downstream gene variant           | MODIFIER | Mrp120   | ENSMUSG00000029066  | Transcript        | ENSMUST00000184339 | processed transcript    | rs49908734 |
| 4:155805545-155805545 | intron variant                    | MODIFIER | Mrp120   | ENSMUSG00000029066  | Transcript        | ENSMUST00000185148 | protein coding          | rs49908734 |
| 4:155809006-155809006 | downstream_gene_variant           | MODIFIER | Mrp120   | ENSMUSG00000029066  | Transcript        | ENSMUST00000030942 | protein_coding          | rs3666643  |
| 4:155809006-155809006 | upstream_gene_variant             | MODIFIER | Ccn12    | ENSMUSG00000029068  | Transcript        | ENSMUST00000030944 | protein_coding          | rs3666643  |
| 4:155809006-155809006 | upstream_gene_variant             | MODIFIER | Ccn12    | ENSMUSG00000029068  | Transcript        | ENSMUST00000126346 | nonsense mediated decay | rs3666643  |
| 4:155809006-155809006 | upstream gene variant             | MODIFIER | Ccn12    | ENSMUSG00000029068  | Transcript        | ENSMUST00000129850 | retained intron         | rs3666643  |
| 4:155809006-155809006 | downstream gene variant           | MODIFIER | Mrp120   | ENSMUSG00000029066  | Transcript        | ENSMUST00000130188 | protein coding          | rs3666643  |
| 4:155809006-155809006 | upstream gene variant             | MODIFIER | Ccn12    | ENSMUSG00000029068  | Transcript        | ENSMUST00000136370 | retained intron         | rs3666643  |
| 4:155809006-155809006 | intron variant,NMD transcript v   | MODIFIER | Mrp120   | ENSMUSG00000029066  | Transcript        | ENSMUST00000137487 | nonsense mediated decay | rs3666643  |
| 4:155809006-155809006 | upstream_gene_variant             | MODIFIER | Ccn12    | ENSMUSG00000029068  | Transcript        | ENSMUST00000139066 | retained_intron         | rs3666643  |
| 4:155809006-155809006 | downstream_gene_variant           | MODIFIER | Mrp120   | ENSMUSG00000029066  | Transcript        | ENSMUST00000143503 | processed_transcript    | rs3666643  |
| 4:155809006-155809006 | downstream_gene_variant           | MODIFIER | Mrp120   | ENSMUSG00000029066  | Transcript        | ENSMUST00000185148 | protein_coding          | rs3666643  |
| 4:155809009-155809009 | downstream gene variant           | MODIFIER | Mrp120   | ENSMUSG00000029066  | Transcript        | ENSMUST00000030942 | protein coding          | rs3666646  |
| 4:155809009-155809009 | upstream gene variant             | MODIFIER | Ccn12    | ENSMUSG00000029068  | Transcript        | ENSMUST00000030944 | protein coding          | rs3666646  |
| 4:155809009-155809009 | upstream gene variant             | MODIFIER | Ccn12    | ENSMUSG00000029068  | Transcript        | ENSMUST00000126346 | nonsense mediated decay | rs3666646  |
| 4:155809009-155809009 | upstream_gene_variant             | MODIFIER | Ccn12    | ENSMUSG00000029068  | Transcript        | ENSMUST00000129850 | retained_intron         | rs3666646  |
| 4:155809009-155809009 | downstream_gene_variant           | MODIFIER | Mrp120   | ENSMUSG00000029066  | Transcript        | ENSMUST00000130188 | protein_coding          | rs3666646  |
| 4:155809009-155809009 | upstream_gene_variant             | MODIFIER | Ccn12    | ENSMUSG00000029068  | Transcript        | ENSMUST00000130188 | protein_coding          | rs3666646  |
| 4:155809009-155809009 | intron variant,NMD transcript v   | MODIFIER | Mrp120   | ENSMUSG00000029066  | Transcript        | ENSMUST00000137487 | nonsense mediated decay | rs3666646  |
| 4:155809009-155809009 | upstream gene variant             | MODIFIER | Ccn12    | ENSMUSG00000029068  | Transcript        | ENSMUST00000139066 | retained intron         | rs3666646  |
| 4:155809009-155809009 | downstream gene variant           | MODIFIER | Mrp120   | ENSMUSG00000029066  | Transcript        | ENSMUST00000143503 | processed transcript    | rs3666646  |
| 4:155812038-155812038 | downstream_gene_variant           | MODIFIER | Mrp120   | ENSMUSG00000029066  | Transcript        | ENSMUST00000185148 | protein coding          | rs3666646  |
| 4:155812038-155812038 | upstream_gene_variant             | MODIFIER | Ccn12    | ENSMUSG00000029068  | Transcript        | ENSMUST00000030944 | protein_coding          | rs3690855  |
| 4:155812038-155812038 | upstream_gene_variant             | MODIFIER | Ccn12    | ENSMUSG00000029068  | Transcript        | ENSMUST00000030944 | protein_coding          | rs3690855  |
| 4:155812038-155812038 | upstream gene variant             | MODIFIER | Ccn12    | ENSMUSG00000029068  | Transcript        | ENSMUST00000126346 | nonsense mediated decay | rs3690855  |
| 4:155812038-155812038 | downstream gene variant           | MODIFIER | Mrp120   | ENSMUSG00000029066  | Transcript        | ENSMUST00000129850 | retained intron         | rs3690855  |
| 4:155812038-155812038 | upstream gene variant             | MODIFIER | Ccn12    | ENSMUSG00000029068  | Transcript        | ENSMUST00000130188 | protein coding          | rs3690855  |
| 4:155812038-155812038 | downstream_gene_variant           | MODIFIER | Mrp120   | ENSMUSG00000029066  | Transcript        | ENSMUST00000136370 | retained intron         | rs3690855  |
| 4:155812038-155812038 | upstream_gene_variant             | MODIFIER | Ccn12    | ENSMUSG00000029068  | Transcript        | ENSMUST00000137487 | nonsense mediated decay | rs3690855  |
| 4:155812038-155812038 | downstream_gene_variant           | MODIFIER | Mrp120   | ENSMUSG00000029066  | Transcript        | ENSMUST00000139066 | retained_intron         | rs3690855  |
| 4:155812038-155812038 | downstream_gene_variant           | MODIFIER | Mrp120   | ENSMUSG00000029066  | Transcript        | ENSMUST00000143503 | processed_transcript    | rs3690855  |
| 4:155812038-155812038 | downstream gene variant           | MODIFIER | Mrp120   | ENSMUSG00000029066  | Transcript        | ENSMUST00000185148 | protein coding          | rs3690855  |
| 4:155812038-155812038 | regulatory region variant         | MODIFIER | -        | -                   | RegulatoryFeature | ENSMUSR00000204472 | promoter                | rs3690855  |
| 4:155889427-155889427 | downstream gene variant           | MODIFIER | Ints11   | ENSMUSG00000029034  | Transcript        | ENSMUST00000030901 | protein coding          | rs51760569 |
| 4:155889427-155889427 | upstream gene variant             | MODIFIER | Acap3    | ENSMUSG00000029033  | Transcript        | ENSMUST00000079031 | protein coding          | rs51760569 |
| 4:155889427-155889427 | splice_region_variant,intron_vari | LOW      | Pus1     | ENSMUSG000000051557 | Transcript        | ENSMUST00000097737 | protein_coding          | rs51760569 |
| 4:155889427-155889427 | upstream_gene_variant             | MODIFIER | Acap3    | ENSMUSG00000029033  | Transcript        | ENSMUST00000105584 | protein_coding          | rs51760569 |
| 4:155889427-155889427 | downstream_gene_variant           | MODIFIER | Ints11   | ENSMUSG00000029034  | Transcript        | ENSMUST00000120794 | protein_coding          | rs51760569 |
| 4:155889427-155889427 | splice_region_variant,intron_vari | LOW      | Pus1     | ENSMUSG000000051557 | Transcript        | ENSMUST00000123504 | processed transcript    | rs51760569 |
| 4:155889427-155889427 | upstream gene variant             | MODIFIER | Acap3    | ENSMUSG00000029033  | Transcript        | ENSMUST00000126582 | processed transcript    | rs51760569 |
| 4:155889427-155889427 | downstream gene variant           | MODIFIER | Pus1     | ENSMUSG000000051557 | Transcript        | ENSMUST00000129637 | retained intron         | rs51760569 |
| 4:155889427-155889427 | downstream_gene_variant           | MODIFIER | Pus1     | ENSMUSG000000051557 | Transcript        | ENSMUST00000130146 | retained_intron         | rs51760569 |
| 4:155889427-155889427 | upstream_gene_variant             | MODIFIER | Acap3    | ENSMUSG00000029033  | Transcript        | ENSMUST00000131168 | processed_transcript    | rs51760569 |
| 4:155889427-155889427 | downstream_gene_variant           | MODIFIER | Ints11   | ENSMUSG00000029034  | Transcript        | ENSMUST00000132632 | retained_intron         | rs51760569 |
| 4:155889427-155889427 | downstream gene variant           | MODIFIER | Ints11   | ENSMUSG00000029034  | Transcript        | ENSMUST00000134678 | processed transcript    | rs51760569 |
| 4:155889427-155889427 | downstream gene variant           | MODIFIER | Ints11   | ENSMUSG00000029034  | Transcript        | ENSMUST00000135844 | retained intron         | rs51760569 |
| 4:155889427-155889427 | upstream gene variant             | MODIFIER | Acap3    | ENSMUSG00000029033  | Transcript        | ENSMUST00000137726 | processed transcript    | rs51760569 |
| 4:155889427-155889427 | downstream gene variant           | MODIFIER | Pus1     | ENSMUSG000000051557 | Transcript        | ENSMUST00000142566 | processed transcript    | rs51760569 |
| 4:155889427-155889427 | downstream_gene_variant           | MODIFIER | Pus1     | ENSMUSG000000051557 | Transcript        | ENSMUST00000142724 | retained_intron         | rs51760569 |
| 4:155889427-155889427 | downstream_gene_variant           | MODIFIER | Pus1     | ENSMUSG000000051557 | Transcript        | ENSMUST00000150446 | retained_intron         | rs51760569 |
| 4:155889427-155889427 | downstream_gene_variant           | MODIFIER | Ints11   | ENSMUSG00000029034  | Transcript        | ENSMUST00000156460 | nonsense mediated decay | rs51760569 |

|                       |                                   |          |         |                     |                   |                    |                          |             |
|-----------------------|-----------------------------------|----------|---------|---------------------|-------------------|--------------------|--------------------------|-------------|
| 4:155895172-155895172 | intron variant                    | MODIFIER | Acap3   | ENSMUSG00000029033  | Transcript        | ENSMUST00000079031 | protein coding           | rs47536647  |
| 4:155895172-155895172 | upstream_gene_variant             | MODIFIER | Pus1    | ENSMUSG000000051557 | Transcript        | ENSMUST00000097737 | protein_coding           | rs47536647  |
| 4:155895172-155895172 | intron_variant                    | MODIFIER | Acap3   | ENSMUSG00000029033  | Transcript        | ENSMUST00000105584 | protein_coding           | rs47536647  |
| 4:155895172-155895172 | intron_variant,non_coding_trans   | MODIFIER | Acap3   | ENSMUSG00000029033  | Transcript        | ENSMUST00000126582 | processed_transcript     | rs47536647  |
| 4:155895172-155895172 | upstream gene variant             | MODIFIER | Pus1    | ENSMUSG000000051557 | Transcript        | ENSMUST00000129637 | retained intron          | rs47536647  |
| 4:155895172-155895172 | upstream gene variant             | MODIFIER | Pus1    | ENSMUSG000000051557 | Transcript        | ENSMUST00000130146 | retained intron          | rs47536647  |
| 4:155895172-155895172 | intron variant,non_coding_trans   | MODIFIER | Acap3   | ENSMUSG00000029033  | Transcript        | ENSMUST00000131168 | processed transcript     | rs47536647  |
| 4:155895172-155895172 | intron_variant,non_coding_trans   | MODIFIER | Acap3   | ENSMUSG00000029033  | Transcript        | ENSMUST00000137726 | processed_transcript     | rs47536647  |
| 4:155895172-155895172 | upstream_gene_variant             | MODIFIER | Pus1    | ENSMUSG000000051557 | Transcript        | ENSMUST00000142566 | processed_transcript     | rs47536647  |
| 4:155895172-155895172 | upstream_gene_variant             | MODIFIER | Pus1    | ENSMUSG000000051557 | Transcript        | ENSMUST00000142724 | retained_intron          | rs47536647  |
| 4:155895172-155895172 | upstream gene variant             | MODIFIER | Pus1    | ENSMUSG000000051557 | Transcript        | ENSMUST00000150446 | retained intron          | rs47536647  |
| 4:155895172-155895172 | regulatory region variant         | MODIFIER | -       | -                   | RegulatoryFeature | ENSMUSR00000204486 | promoter                 | rs47536647  |
| 4:155895728-155895729 | intron variant                    | MODIFIER | Acap3   | ENSMUSG00000029033  | Transcript        | ENSMUST00000079031 | protein coding           | rs248031195 |
| 4:155895728-155895729 | upstream gene variant             | MODIFIER | Pus1    | ENSMUSG000000051557 | Transcript        | ENSMUST00000097737 | protein coding           | rs248031195 |
| 4:155895728-155895729 | intron_variant                    | MODIFIER | Acap3   | ENSMUSG00000029033  | Transcript        | ENSMUST00000105584 | protein_coding           | rs248031195 |
| 4:155895728-155895729 | intron_variant,non_coding_trans   | MODIFIER | Acap3   | ENSMUSG00000029033  | Transcript        | ENSMUST00000126582 | processed_transcript     | rs248031195 |
| 4:155895728-155895729 | upstream_gene_variant             | MODIFIER | Pus1    | ENSMUSG000000051557 | Transcript        | ENSMUST00000129637 | retained_intron          | rs248031195 |
| 4:155895728-155895729 | upstream gene variant             | MODIFIER | Pus1    | ENSMUSG000000051557 | Transcript        | ENSMUST00000130146 | retained intron          | rs248031195 |
| 4:155895728-155895729 | intron variant,non_coding_trans   | MODIFIER | Acap3   | ENSMUSG00000029033  | Transcript        | ENSMUST00000131168 | processed transcript     | rs248031195 |
| 4:155895728-155895729 | intron_variant,non_coding_trans   | MODIFIER | Acap3   | ENSMUSG00000029033  | Transcript        | ENSMUST00000137726 | processed transcript     | rs248031195 |
| 4:155895728-155895729 | upstream_gene_variant             | MODIFIER | Pus1    | ENSMUSG000000051557 | Transcript        | ENSMUST00000142566 | processed_transcript     | rs248031195 |
| 4:155895728-155895729 | upstream_gene_variant             | MODIFIER | Pus1    | ENSMUSG000000051557 | Transcript        | ENSMUST00000142724 | retained_intron          | rs248031195 |
| 4:155895728-155895729 | upstream_gene_variant             | MODIFIER | Pus1    | ENSMUSG000000051557 | Transcript        | ENSMUST00000150446 | retained_intron          | rs248031195 |
| 4:155908341-155908341 | downstream gene variant           | MODIFIER | Acap3   | ENSMUSG00000029033  | Transcript        | ENSMUST00000079031 | protein coding           | rs3725431   |
| 4:155908341-155908341 | downstream gene variant           | MODIFIER | Acap3   | ENSMUSG00000029033  | Transcript        | ENSMUST00000105584 | protein coding           | rs3725431   |
| 4:155908341-155908341 | downstream gene variant           | MODIFIER | Acap3   | ENSMUSG00000029033  | Transcript        | ENSMUST00000131372 | processed transcript     | rs3725431   |
| 4:155908341-155908341 | downstream gene variant           | MODIFIER | Acap3   | ENSMUSG00000029033  | Transcript        | ENSMUST00000137726 | processed transcript     | rs3725431   |
| 4:155908341-155908341 | downstream_gene_variant           | MODIFIER | Acap3   | ENSMUSG00000029033  | Transcript        | ENSMUST00000140855 | processed_transcript     | rs3725431   |
| 4:155908341-155908341 | downstream_gene_variant           | MODIFIER | Acap3   | ENSMUSG00000029033  | Transcript        | ENSMUST00000145654 | retained_intron          | rs3725431   |
| 4:155908341-155908341 | upstream_gene_variant             | MODIFIER | Gm22991 | ENSMUSG00000096174  | Transcript        | ENSMUST00000178126 | miRNA                    | rs3725431   |
| 4:155908562-155908562 | downstream gene variant           | MODIFIER | Acap3   | ENSMUSG00000029033  | Transcript        | ENSMUST00000079031 | protein coding           | rs32410455  |
| 4:155908562-155908562 | downstream gene variant           | MODIFIER | Acap3   | ENSMUSG00000029033  | Transcript        | ENSMUST00000105584 | protein coding           | rs32410455  |
| 4:155908562-155908562 | downstream gene variant           | MODIFIER | Acap3   | ENSMUSG00000029033  | Transcript        | ENSMUST00000131372 | processed transcript     | rs32410455  |
| 4:155908562-155908562 | downstream_gene_variant           | MODIFIER | Acap3   | ENSMUSG00000029033  | Transcript        | ENSMUST00000137726 | processed_transcript     | rs32410455  |
| 4:155908562-155908562 | downstream_gene_variant           | MODIFIER | Acap3   | ENSMUSG00000029033  | Transcript        | ENSMUST00000140855 | processed_transcript     | rs32410455  |
| 4:155908562-155908562 | downstream_gene_variant           | MODIFIER | Acap3   | ENSMUSG00000029033  | Transcript        | ENSMUST00000145654 | retained_intron          | rs32410455  |
| 4:155908562-155908562 | upstream gene variant             | MODIFIER | Gm22991 | ENSMUSG00000096174  | Transcript        | ENSMUST00000178126 | miRNA                    | rs32410455  |
| 4:155909517-155909517 | downstream gene variant           | MODIFIER | Acap3   | ENSMUSG00000029033  | Transcript        | ENSMUST00000079031 | protein coding           | rs32231309  |
| 4:155909517-155909517 | downstream gene variant           | MODIFIER | Acap3   | ENSMUSG00000029033  | Transcript        | ENSMUST00000105584 | protein coding           | rs32231309  |
| 4:155909517-155909517 | downstream gene variant           | MODIFIER | Acap3   | ENSMUSG00000029033  | Transcript        | ENSMUST00000131372 | processed transcript     | rs32231309  |
| 4:155909517-155909517 | downstream_gene_variant           | MODIFIER | Acap3   | ENSMUSG00000029033  | Transcript        | ENSMUST00000137726 | processed_transcript     | rs32231309  |
| 4:155909517-155909517 | downstream_gene_variant           | MODIFIER | Acap3   | ENSMUSG00000029033  | Transcript        | ENSMUST00000140855 | processed_transcript     | rs32231309  |
| 4:155909517-155909517 | downstream_gene_variant           | MODIFIER | Acap3   | ENSMUSG00000029033  | Transcript        | ENSMUST00000145654 | retained_intron          | rs32231309  |
| 4:155909517-155909517 | upstream gene variant             | MODIFIER | Gm22991 | ENSMUSG00000096174  | Transcript        | ENSMUST00000178126 | miRNA                    | rs32231309  |
| 4:155910747-155910747 | downstream gene variant           | MODIFIER | Acap3   | ENSMUSG00000029033  | Transcript        | ENSMUST00000079031 | protein coding           | rs46399013  |
| 4:155910747-155910747 | downstream gene variant           | MODIFIER | Acap3   | ENSMUSG00000029033  | Transcript        | ENSMUST00000105584 | protein coding           | rs46399013  |
| 4:155910747-155910747 | downstream_gene_variant           | MODIFIER | Acap3   | ENSMUSG00000029033  | Transcript        | ENSMUST00000137726 | processed_transcript     | rs46399013  |
| 4:155910747-155910747 | downstream_gene_variant           | MODIFIER | Acap3   | ENSMUSG00000029033  | Transcript        | ENSMUST00000140855 | processed_transcript     | rs46399013  |
| 4:155910747-155910747 | upstream_gene_variant             | MODIFIER | Gm22991 | ENSMUSG00000096174  | Transcript        | ENSMUST00000178126 | miRNA                    | rs46399013  |
| 4:155928071-155928071 | intergenic variant                | MODIFIER | -       | -                   | -                 | -                  | -                        | rs227265312 |
| 4:155928227-155928227 | regulatory region variant         | MODIFIER | -       | -                   | RegulatoryFeature | ENSMUSR00000675286 | promoter flanking region | rs48323324  |
| 4:155928227-155928227 | regulatory region variant         | MODIFIER | -       | -                   | RegulatoryFeature | ENSMUSR00000675287 | CTCF binding site        | rs48323324  |
| 4:155928227-155928227 | intergenic variant                | MODIFIER | -       | -                   | -                 | -                  | -                        | rs48323324  |
| 4:155928266-155928266 | regulatory_region_variant         | MODIFIER | -       | -                   | RegulatoryFeature | ENSMUSR00000675286 | promoter_flanking_region | rs46724433  |
| 4:155928266-155928266 | regulatory_region_variant         | MODIFIER | -       | -                   | RegulatoryFeature | ENSMUSR00000675287 | CTCF_binding_site        | rs46724433  |
| 4:155928266-155928266 | intergenic_variant                | MODIFIER | -       | -                   | -                 | -                  | -                        | rs46724433  |
| 4:32022582-32022582   | 3 prime UTR variant               | MODIFIER | Map3k7  | ENSMUSG00000028284  | Transcript        | ENSMUST00000037607 | protein coding           | -           |
| 4:32022582-32022582   | 3 prime UTR variant               | MODIFIER | Map3k7  | ENSMUSG00000028284  | Transcript        | ENSMUST00000080933 | protein coding           | -           |
| 4:32022582-32022582   | 3 prime UTR variant               | MODIFIER | Map3k7  | ENSMUSG00000028284  | Transcript        | ENSMUST00000108183 | protein coding           | -           |
| 4:32022582-32022582   | 3_prime_UTR_variant               | MODIFIER | Map3k7  | ENSMUSG00000028284  | Transcript        | ENSMUST00000108184 | protein_coding           | -           |
| 4:32022582-32022582   | downstream_gene_variant           | MODIFIER | Map3k7  | ENSMUSG00000028284  | Transcript        | ENSMUST00000131310 | processed_transcript     | -           |
| 4:3554421-3554421     | splice_region_variant,intron_vari | LOW      | Tmem68  | ENSMUSG00000028232  | Transcript        | ENSMUST00000029891 | protein_coding           | rs221598772 |
| 4:3554421-3554421     | upstream gene variant             | MODIFIER | Tmem68  | ENSMUSG00000028232  | Transcript        | ENSMUST00000134806 | retained intron          | rs221598772 |
| 4:3554421-3554421     | splice region variant,intron vari | LOW      | Tmem68  | ENSMUSG00000028232  | Transcript        | ENSMUST00000154922 | nonsense mediated decay  | rs221598772 |
| 4:3677607-3677607     | upstream gene variant             | MODIFIER | Lyn     | ENSMUSG00000042228  | Transcript        | ENSMUST00000041377 | protein coding           | rs32577200  |
| 4:3677607-3677607     | upstream gene variant             | MODIFIER | Lyn     | ENSMUSG00000042228  | Transcript        | ENSMUST00000103010 | protein coding           | rs32577200  |
| 4:3677607-3677607     | upstream_gene_variant             | MODIFIER | Lyn     | ENSMUSG00000042228  | Transcript        | ENSMUST00000145083 | processed_transcript     | rs32577200  |
| 4:3677607-3677607     | downstream_gene_variant           | MODIFIER | Gm26857 | ENSMUSG00000097860  | Transcript        | ENSMUST00000181580 | lincRNA                  | rs32577200  |
| 4:3677607-3677607     | regulatory_region_variant         | MODIFIER | -       | -                   | RegulatoryFeature | ENSMUSR00000186649 | promoter                 | rs32577200  |

|                     |                                 |          |          |                    |                   |                     |                          |             |
|---------------------|---------------------------------|----------|----------|--------------------|-------------------|---------------------|--------------------------|-------------|
| 4:3684160-3684160   | intron variant                  | MODIFIER | Lyn      | ENSMUSG00000042228 | Transcript        | ENSMUST00000041377  | protein coding           | rs32350600  |
| 4:3684160-3684160   | intron_variant                  | MODIFIER | Lyn      | ENSMUSG00000042228 | Transcript        | ENSMUST00000103010  | protein_coding           | rs32350600  |
| 4:3684160-3684160   | intron_variant,non_coding_trans | MODIFIER | Lyn      | ENSMUSG00000042228 | Transcript        | ENSMUST00000145083  | processed_transcript     | rs32350600  |
| 4:3684160-3684160   | intron_variant,non_coding_trans | MODIFIER | Gm26857  | ENSMUSG00000097860 | Transcript        | ENSMUST00000181580  | lincRNA                  | rs32350600  |
| 4:3798780-3798780   | upstream gene variant           | MODIFIER | Gm22781  | ENSMUSG00000077271 | Transcript        | ENSMUST00000104083  | snoRNA                   | rs27722533  |
| 4:3798780-3798780   | intron variant,non coding trans | MODIFIER | Lyn      | ENSMUSG00000042228 | Transcript        | ENSMUST00000137943  | processed transcript     | rs27722533  |
| 4:3798780-3798780   | regulatory region variant       | MODIFIER | -        | -                  | RegulatoryFeature | ENSMUSR000000656831 | promoter flanking region | rs27722533  |
| 4:3831839-3831841   | downstream_gene_variant         | MODIFIER | Rps20    | ENSMUSG00000028234 | Transcript        | ENSMUST00000103009  | retained_intron          | rs387841377 |
| 4:3831839-3831841   | downstream_gene_variant         | MODIFIER | Rps20    | ENSMUSG00000028234 | Transcript        | ENSMUST00000130128  | retained_intron          | rs387841377 |
| 4:3831839-3831841   | 3_prime_UTR_variant             | MODIFIER | Rps20    | ENSMUSG00000028234 | Transcript        | ENSMUST00000138502  | protein_coding           | rs387841377 |
| 4:3831839-3831841   | downstream gene variant         | MODIFIER | Gm24016  | ENSMUSG00000088351 | Transcript        | ENSMUST00000157726  | snoRNA                   | rs387841377 |
| 4:46582584-46582584 | intron variant                  | MODIFIER | Coro2a   | ENSMUSG00000028337 | Transcript        | ENSMUST00000107756  | protein coding           | rs108527415 |
| 4:46582584-46582584 | intron variant,non coding trans | MODIFIER | Coro2a   | ENSMUSG00000028337 | Transcript        | ENSMUST00000127304  | processed transcript     | rs108527415 |
| 4:46582584-46582584 | intron variant,non coding trans | MODIFIER | Coro2a   | ENSMUSG00000028337 | Transcript        | ENSMUST00000139179  | retained intron          | rs108527415 |
| 4:46582584-46582584 | regulatory_region_variant       | MODIFIER | -        | -                  | RegulatoryFeature | ENSMUSR00000190314  | promoter_flanking_region | rs108527415 |
| 4:55294764-55294764 | downstream_gene_variant         | MODIFIER | Gm25419  | ENSMUSG00000077403 | Transcript        | ENSMUST00000104215  | snoRNA                   | rs27791710  |
| 4:55294764-55294764 | regulatory_region_variant       | MODIFIER | -        | -                  | RegulatoryFeature | ENSMUSR00000191218  | promoter_flanking_region | rs27791710  |
| 4:55392019-55392019 | 3 prime UTR variant             | MODIFIER | Rad23b   | ENSMUSG00000028426 | Transcript        | ENSMUST00000030134  | protein_coding           | rs27774136  |
| 4:55392019-55392019 | downstream gene variant         | MODIFIER | Gm12516  | ENSMUSG00000084144 | Transcript        | ENSMUST00000120819  | processed_pseudogene     | rs27774136  |
| 4:55531024-55531024 | intron variant                  | MODIFIER | Klf4     | ENSMUSG0000003032  | Transcript        | ENSMUST00000107619  | protein_coding           | rs33024037  |
| 4:55531024-55531024 | intron_variant                  | MODIFIER | Klf4     | ENSMUSG0000003032  | Transcript        | ENSMUST00000129250  | protein_coding           | rs33024037  |
| 4:55531024-55531024 | intron_variant                  | MODIFIER | Klf4     | ENSMUSG0000003032  | Transcript        | ENSMUST00000132746  | protein_coding           | rs33024037  |
| 4:55531024-55531024 | regulatory_region_variant       | MODIFIER | -        | -                  | RegulatoryFeature | ENSMUSR00000191275  | promoter                 | rs33024037  |
| 4:55531025-55531025 | intron variant                  | MODIFIER | Klf4     | ENSMUSG0000003032  | Transcript        | ENSMUST00000107619  | protein_coding           | rs32258067  |
| 4:55531025-55531025 | intron variant                  | MODIFIER | Klf4     | ENSMUSG0000003032  | Transcript        | ENSMUST00000129250  | protein_coding           | rs32258067  |
| 4:55531025-55531025 | intron variant                  | MODIFIER | Klf4     | ENSMUSG0000003032  | Transcript        | ENSMUST00000132746  | protein_coding           | rs32258067  |
| 4:55531025-55531025 | regulatory region variant       | MODIFIER | -        | -                  | RegulatoryFeature | ENSMUSR00000191275  | promoter                 | rs32258067  |
| 4:59025645-59025645 | downstream_gene_variant         | MODIFIER | Dnajc25  | ENSMUSG00000070972 | Transcript        | ENSMUST00000095070  | protein_coding           | rs32856947  |
| 4:59025645-59025645 | downstream_gene_variant         | MODIFIER | Dnajc25  | ENSMUSG00000070972 | Transcript        | ENSMUST00000150309  | nonsense_mediated_decay  | rs32856947  |
| 4:59025645-59025645 | downstream_gene_variant         | MODIFIER | Dnajc25  | ENSMUSG00000070972 | Transcript        | ENSMUST00000152199  | protein_coding           | rs32856947  |
| 4:59025645-59025645 | downstream gene variant         | MODIFIER | Dnajc25  | ENSMUSG00000070972 | Transcript        | ENSMUST00000153467  | nonsense mediated decay  | rs32856947  |
| 4:59025645-59025645 | intron variant                  | MODIFIER | Gm20503  | ENSMUSG00000092345 | Transcript        | ENSMUST00000174664  | protein_coding           | rs32856947  |
| 4:59025646-59025646 | downstream gene variant         | MODIFIER | Dnajc25  | ENSMUSG00000070972 | Transcript        | ENSMUST00000095070  | protein_coding           | rs32659270  |
| 4:59025646-59025646 | downstream_gene_variant         | MODIFIER | Dnajc25  | ENSMUSG00000070972 | Transcript        | ENSMUST00000150309  | nonsense_mediated_decay  | rs32659270  |
| 4:59025646-59025646 | downstream_gene_variant         | MODIFIER | Dnajc25  | ENSMUSG00000070972 | Transcript        | ENSMUST00000152199  | protein_coding           | rs32659270  |
| 4:59025646-59025646 | downstream_gene_variant         | MODIFIER | Dnajc25  | ENSMUSG00000070972 | Transcript        | ENSMUST00000153467  | nonsense_mediated_decay  | rs32659270  |
| 4:59025646-59025646 | intron variant                  | MODIFIER | Gm20503  | ENSMUSG00000092345 | Transcript        | ENSMUST00000174664  | protein_coding           | rs32659270  |
| 4:63356589-63356589 | missense variant                | MODERATE | Orn3     | ENSMUSG00000028359 | Transcript        | ENSMUST00000006687  | protein_coding           | rs27884279  |
| 4:63356589-63356589 | downstream gene variant         | MODIFIER | Gm11212  | ENSMUSG00000082141 | Transcript        | ENSMUST00000118337  | unprocessed_pseudogene   | rs27884279  |
| 4:63356589-63356589 | regulatory region variant       | MODIFIER | -        | -                  | RegulatoryFeature | ENSMUSR00000662357  | enhancer                 | rs27884279  |
| 4:63356599-63356599 | missense_variant                | MODERATE | Orn3     | ENSMUSG00000028359 | Transcript        | ENSMUST00000006687  | protein_coding           | rs27884278  |
| 4:63356599-63356599 | downstream_gene_variant         | MODIFIER | Gm11212  | ENSMUSG00000082141 | Transcript        | ENSMUST00000118337  | unprocessed_pseudogene   | rs27884278  |
| 4:63356599-63356599 | regulatory_region_variant       | MODIFIER | -        | -                  | RegulatoryFeature | ENSMUSR00000662357  | enhancer                 | rs27884278  |
| 4:63356708-63356708 | synonymous variant              | LOW      | Orn3     | ENSMUSG00000028359 | Transcript        | ENSMUST00000006687  | protein_coding           | rs27884277  |
| 4:63356708-63356708 | downstream gene variant         | MODIFIER | Gm11212  | ENSMUSG00000082141 | Transcript        | ENSMUST00000118337  | unprocessed_pseudogene   | rs27884277  |
| 4:63356708-63356708 | regulatory region variant       | MODIFIER | -        | -                  | RegulatoryFeature | ENSMUSR00000662357  | enhancer                 | rs27884277  |
| 4:63356730-63356730 | intron_variant                  | MODIFIER | Orn3     | ENSMUSG00000028359 | Transcript        | ENSMUST00000006687  | protein_coding           | rs46330627  |
| 4:63356730-63356730 | downstream_gene_variant         | MODIFIER | Gm11212  | ENSMUSG00000082141 | Transcript        | ENSMUST00000118337  | unprocessed_pseudogene   | rs46330627  |
| 4:63356730-63356730 | regulatory_region_variant       | MODIFIER | -        | -                  | RegulatoryFeature | ENSMUSR00000662357  | enhancer                 | rs46330627  |
| 4:63357242-63357242 | intron variant                  | MODIFIER | Orn3     | ENSMUSG00000028359 | Transcript        | ENSMUST00000006687  | protein_coding           | rs27884272  |
| 4:63357242-63357242 | downstream gene variant         | MODIFIER | Gm11212  | ENSMUSG00000082141 | Transcript        | ENSMUST00000118337  | unprocessed_pseudogene   | rs27884272  |
| 4:63359429-63359429 | 3 prime UTR variant             | MODIFIER | Orn3     | ENSMUSG00000028359 | Transcript        | ENSMUST00000006687  | unprocessed_pseudogene   | rs46823976  |
| 4:63359429-63359429 | upstream gene variant           | MODIFIER | Orn2     | ENSMUSG00000061540 | Transcript        | ENSMUST00000075341  | protein_coding           | rs46823976  |
| 4:63359454-63359454 | 3_prime_UTR_variant             | MODIFIER | Orn3     | ENSMUSG00000028359 | Transcript        | ENSMUST00000006687  | protein_coding           | rs4938250   |
| 4:63359454-63359454 | upstream_gene_variant           | MODIFIER | Orn2     | ENSMUSG00000061540 | Transcript        | ENSMUST00000075341  | protein_coding           | rs4938250   |
| 4:63551277-63551277 | downstream_gene_variant         | MODIFIER | Atp6v1g1 | ENSMUSG00000039105 | Transcript        | ENSMUST00000035301  | protein_coding           | rs32587139  |
| 4:6741550-6741550   | synonymous variant              | LOW      | Tox      | ENSMUSG00000041272 | Transcript        | ENSMUST00000039987  | protein_coding           | rs27657701  |
| 4:6741550-6741550   | non coding transcript exon var  | MODIFIER | Tox      | ENSMUSG00000041272 | Transcript        | ENSMUST00000147657  | retained intron          | rs27657701  |
| 4:6741559-6741559   | missense variant                | MODERATE | Tox      | ENSMUSG00000041272 | Transcript        | ENSMUST00000039987  | protein_coding           | rs27657700  |
| 4:6741559-6741559   | non_coding_transcript_exon_var  | MODIFIER | Tox      | ENSMUSG00000041272 | Transcript        | ENSMUST00000147657  | retained_intron          | rs27657700  |
| 4:8145899-8145899   | 3_prime_UTR_variant             | MODIFIER | Car8     | ENSMUSG00000041261 | Transcript        | ENSMUST00000066674  | protein_coding           | rs3022975   |
| 4:8146020-8146022   | 3_prime_UTR_variant             | MODIFIER | Car8     | ENSMUSG00000041261 | Transcript        | ENSMUST00000066674  | protein_coding           | rs234209929 |
| 4:8146044-8146044   | 3 prime UTR variant             | MODIFIER | Car8     | ENSMUSG00000041261 | Transcript        | ENSMUST00000066674  | protein_coding           | rs27660680  |
| 4:8146190-8146190   | 3 prime UTR variant             | MODIFIER | Car8     | ENSMUSG00000041261 | Transcript        | ENSMUST00000066674  | protein_coding           | rs46508305  |
| 4:8146191-8146191   | 3 prime UTR variant             | MODIFIER | Car8     | ENSMUSG00000041261 | Transcript        | ENSMUST00000066674  | protein_coding           | rs27660679  |
| 4:8592223-8592223   | intron variant                  | MODIFIER | Rab2a    | ENSMUSG00000047187 | Transcript        | ENSMUST00000060232  | protein_coding           | rs49216954  |
| 4:8595089-8595089   | intron_variant                  | MODIFIER | Rab2a    | ENSMUSG00000047187 | Transcript        | ENSMUST00000060232  | protein_coding           | rs27676358  |
| 4:8599006-8599006   | intron_variant                  | MODIFIER | Rab2a    | ENSMUSG00000047187 | Transcript        | ENSMUST00000060232  | protein_coding           | rs32049485  |
| 4:8602367-8602367   | intron_variant                  | MODIFIER | Rab2a    | ENSMUSG00000047187 | Transcript        | ENSMUST00000060232  | protein_coding           | rs27676328  |

|                       |                                 |          |         |                    |            |                    |                         |             |
|-----------------------|---------------------------------|----------|---------|--------------------|------------|--------------------|-------------------------|-------------|
| 4:94088821-94088821   | downstream gene variant         | MODIFIER | Gm12648 | ENSMUSG00000085931 | Transcript | ENSMUST00000126270 | lincRNA                 | rs32008015  |
| 5:100566414-100566414 | intron_variant                  | MODIFIER | Plac8   | ENSMUSG00000029322 | Transcript | ENSMUST00000031264 | protein_coding          | rs33151758  |
| 5:100566414-100566414 | upstream_gene_variant           | MODIFIER | Plac8   | ENSMUSG00000029322 | Transcript | ENSMUST00000097437 | protein_coding          | rs33151758  |
| 5:100566414-100566414 | upstream_gene_variant           | MODIFIER | Plac8   | ENSMUSG00000029322 | Transcript | ENSMUST00000112910 | protein_coding          | rs33151758  |
| 5:100566414-100566414 | intron_variant,non coding trans | MODIFIER | Plac8   | ENSMUSG00000029322 | Transcript | ENSMUST00000144595 | retained intron         | rs33151758  |
| 5:107902834-107902834 | intron variant                  | MODIFIER | Rpl5    | ENSMUSG00000058558 | Transcript | ENSMUST00000082223 | protein coding          | rs33691132  |
| 5:107902834-107902834 | upstream gene variant           | MODIFIER | Shord21 | ENSMUSG00000064453 | Transcript | ENSMUST00000082519 | snoRNA                  | rs33691132  |
| 5:107902834-107902834 | upstream_gene_variant           | MODIFIER | Gm22270 | ENSMUSG00000077222 | Transcript | ENSMUST00000104034 | snoRNA                  | rs33691132  |
| 5:107902834-107902834 | upstream_gene_variant           | MODIFIER | Gm26387 | ENSMUSG00000077426 | Transcript | ENSMUST00000104238 | snoRNA                  | rs33691132  |
| 5:107902834-107902834 | intron_variant,non coding trans | MODIFIER | Rpl5    | ENSMUSG00000058558 | Transcript | ENSMUST00000123183 | retained_intron         | rs33691132  |
| 5:107902834-107902834 | intron variant,non coding trans | MODIFIER | Rpl5    | ENSMUSG00000058558 | Transcript | ENSMUST00000129944 | retained intron         | rs33691132  |
| 5:107902834-107902834 | upstream gene variant           | MODIFIER | Rpl5    | ENSMUSG00000058558 | Transcript | ENSMUST00000140659 | retained intron         | rs33691132  |
| 5:107902834-107902834 | upstream gene variant           | MODIFIER | Rpl5    | ENSMUSG00000058558 | Transcript | ENSMUST00000151767 | retained intron         | rs33691132  |
| 5:107902834-107902834 | intron variant                  | MODIFIER | Rpl5    | ENSMUSG00000058558 | Transcript | ENSMUST00000153590 | protein coding          | rs33691132  |
| 5:108097005-108097005 | intron_variant                  | MODIFIER | Mtf2    | ENSMUSG00000029267 | Transcript | ENSMUST00000081567 | protein_coding          | rs33649355  |
| 5:108097005-108097005 | intron_variant                  | MODIFIER | Mtf2    | ENSMUSG00000029267 | Transcript | ENSMUST00000112626 | protein_coding          | rs33649355  |
| 5:108097005-108097005 | intron_variant,NMD_transcript_v | MODIFIER | Mtf2    | ENSMUSG00000029267 | Transcript | ENSMUST00000124195 | nonsense_mediated_decay | rs33649355  |
| 5:108097005-108097005 | intron variant,NMD transcript v | MODIFIER | Mtf2    | ENSMUSG00000029267 | Transcript | ENSMUST00000129921 | nonsense mediated decay | rs33649355  |
| 5:108097005-108097005 | intron variant,non coding trans | MODIFIER | Mtf2    | ENSMUSG00000029267 | Transcript | ENSMUST00000131264 | processed transcript    | rs33649355  |
| 5:108097005-108097005 | intron variant,non coding trans | MODIFIER | Mtf2    | ENSMUSG00000029267 | Transcript | ENSMUST00000131291 | processed transcript    | rs33649355  |
| 5:108097005-108097005 | intron_variant,NMD_transcript_v | MODIFIER | Mtf2    | ENSMUSG00000029267 | Transcript | ENSMUST00000134026 | nonsense_mediated_decay | rs33649355  |
| 5:108097005-108097005 | intron_variant                  | MODIFIER | Mtf2    | ENSMUSG00000029267 | Transcript | ENSMUST00000137996 | protein_coding          | rs33649355  |
| 5:108097005-108097005 | intron_variant,non coding trans | MODIFIER | Mtf2    | ENSMUSG00000029267 | Transcript | ENSMUST00000141592 | processed_transcript    | rs33649355  |
| 5:108097005-108097005 | intron variant,NMD transcript v | MODIFIER | Mtf2    | ENSMUSG00000029267 | Transcript | ENSMUST00000143412 | nonsense mediated decay | rs33649355  |
| 5:108097005-108097005 | downstream gene variant         | MODIFIER | Mtf2    | ENSMUSG00000029267 | Transcript | ENSMUST00000170319 | protein coding          | rs33649355  |
| 5:108097005-108097005 | intron variant,non coding trans | MODIFIER | Mtf2    | ENSMUSG00000029267 | Transcript | ENSMUST00000198662 | processed transcript    | rs33649355  |
| 5:108128001-108128001 | intron variant                  | MODIFIER | Tmed5   | ENSMUSG00000063406 | Transcript | ENSMUST00000002837 | protein coding          | rs259364096 |
| 5:108128001-108128001 | upstream_gene_variant           | MODIFIER | Ccdc18  | ENSMUSG00000056531 | Transcript | ENSMUST00000047677 | protein_coding          | rs259364096 |
| 5:108128001-108128001 | intron_variant                  | MODIFIER | Tmed5   | ENSMUSG00000063406 | Transcript | ENSMUST00000061203 | protein_coding          | rs259364096 |
| 5:108128001-108128001 | downstream_gene_variant         | MODIFIER | Tmed5   | ENSMUSG00000063406 | Transcript | ENSMUST00000117759 | protein_coding          | rs259364096 |
| 5:108128001-108128001 | intron variant                  | MODIFIER | Tmed5   | ENSMUSG00000063406 | Transcript | ENSMUST00000118036 | protein coding          | rs259364096 |
| 5:108128001-108128001 | intron variant                  | MODIFIER | Tmed5   | ENSMUSG00000063406 | Transcript | ENSMUST00000119437 | protein coding          | rs259364096 |
| 5:108128001-108128001 | downstream gene variant         | MODIFIER | Tmed5   | ENSMUSG00000063406 | Transcript | ENSMUST00000119784 | protein coding          | rs259364096 |
| 5:108128001-108128001 | upstream_gene_variant           | MODIFIER | Ccdc18  | ENSMUSG00000056531 | Transcript | ENSMUST00000197718 | nonsense_mediated_decay | rs259364096 |
| 5:108128001-108128001 | upstream_gene_variant           | MODIFIER | Ccdc18  | ENSMUSG00000056531 | Transcript | ENSMUST00000200463 | retained_intron         | rs259364096 |
| 5:108129672-108129672 | intron_variant                  | MODIFIER | Tmed5   | ENSMUSG00000063406 | Transcript | ENSMUST00000002837 | protein_coding          | rs29624612  |
| 5:108129672-108129672 | upstream gene variant           | MODIFIER | Ccdc18  | ENSMUSG00000056531 | Transcript | ENSMUST00000047677 | protein coding          | rs29624612  |
| 5:108129672-108129672 | intron variant                  | MODIFIER | Tmed5   | ENSMUSG00000063406 | Transcript | ENSMUST00000061203 | protein coding          | rs29624612  |
| 5:108129672-108129672 | intron variant                  | MODIFIER | Tmed5   | ENSMUSG00000063406 | Transcript | ENSMUST00000117759 | protein coding          | rs29624612  |
| 5:108129672-108129672 | intron variant                  | MODIFIER | Tmed5   | ENSMUSG00000063406 | Transcript | ENSMUST00000118036 | protein coding          | rs29624612  |
| 5:108129672-108129672 | intron_variant                  | MODIFIER | Tmed5   | ENSMUSG00000063406 | Transcript | ENSMUST00000119437 | protein_coding          | rs29624612  |
| 5:108129672-108129672 | downstream_gene_variant         | MODIFIER | Tmed5   | ENSMUSG00000063406 | Transcript | ENSMUST00000119784 | protein_coding          | rs29624612  |
| 5:108129672-108129672 | upstream_gene_variant           | MODIFIER | Ccdc18  | ENSMUSG00000056531 | Transcript | ENSMUST00000197718 | nonsense_mediated_decay | rs29624612  |
| 5:108129672-108129672 | upstream gene variant           | MODIFIER | Ccdc18  | ENSMUSG00000056531 | Transcript | ENSMUST00000200463 | retained intron         | rs29624612  |
| 5:108571611-108571611 | intron variant                  | MODIFIER | Gak     | ENSMUSG00000062234 | Transcript | ENSMUST00000046603 | protein coding          | rs33626156  |
| 5:108571611-108571611 | non coding transcript exon var  | MODIFIER | Gak     | ENSMUSG00000062234 | Transcript | ENSMUST00000133745 | retained intron         | rs33626156  |
| 5:108571611-108571611 | intron_variant,NMD_transcript_v | MODIFIER | Gak     | ENSMUSG00000062234 | Transcript | ENSMUST00000135225 | nonsense_mediated_decay | rs33626156  |
| 5:108571611-108571611 | intron_variant,NMD_transcript_v | MODIFIER | Gak     | ENSMUSG00000062234 | Transcript | ENSMUST00000145467 | nonsense_mediated_decay | rs33626156  |
| 5:108571611-108571611 | intron_variant                  | MODIFIER | Gak     | ENSMUSG00000062234 | Transcript | ENSMUST00000156110 | protein_coding          | rs33626156  |
| 5:108571611-108571611 | downstream gene variant         | MODIFIER | Gak     | ENSMUSG00000062234 | Transcript | ENSMUST00000199010 | processed transcript    | rs33626156  |
| 5:108571611-108571611 | intron variant,NMD transcript v | MODIFIER | Gak     | ENSMUSG00000062234 | Transcript | ENSMUST00000199048 | nonsense mediated decay | rs33626156  |
| 5:108631957-108631957 | upstream gene variant           | MODIFIER | Gak     | ENSMUSG00000062234 | Transcript | ENSMUST00000046603 | protein coding          | rs29764584  |
| 5:108631957-108631957 | intron variant                  | MODIFIER | Tmem175 | ENSMUSG00000013495 | Transcript | ENSMUST00000063272 | protein coding          | rs29764584  |
| 5:108631957-108631957 | intron_variant                  | MODIFIER | Tmem175 | ENSMUSG00000013495 | Transcript | ENSMUST00000078323 | protein_coding          | rs29764584  |
| 5:108631957-108631957 | intron_variant                  | MODIFIER | Tmem175 | ENSMUSG00000013495 | Transcript | ENSMUST00000120327 | protein_coding          | rs29764584  |
| 5:108631957-108631957 | upstream_gene_variant           | MODIFIER | Gak     | ENSMUSG00000062234 | Transcript | ENSMUST00000135225 | nonsense_mediated_decay | rs29764584  |
| 5:108631957-108631957 | upstream gene variant           | MODIFIER | Gak     | ENSMUSG00000062234 | Transcript | ENSMUST00000145467 | nonsense mediated decay | rs29764584  |
| 5:108631957-108631957 | upstream gene variant           | MODIFIER | Gak     | ENSMUSG00000062234 | Transcript | ENSMUST00000145935 | processed transcript    | rs29764584  |
| 5:108631957-108631957 | intron variant                  | MODIFIER | Tmem175 | ENSMUSG00000013495 | Transcript | ENSMUST00000146207 | protein coding          | rs29764584  |
| 5:108631957-108631957 | upstream_gene_variant           | MODIFIER | Gak     | ENSMUSG00000062234 | Transcript | ENSMUST00000199048 | nonsense_mediated_decay | rs29764584  |
| 5:108631957-108631957 | upstream_gene_variant           | MODIFIER | Gak     | ENSMUSG00000062234 | Transcript | ENSMUST00000199662 | nonsense_mediated_decay | rs29764584  |
| 5:108635349-108635349 | intron_variant                  | MODIFIER | Tmem175 | ENSMUSG00000013495 | Transcript | ENSMUST00000063272 | protein_coding          | rs3709503   |
| 5:108635349-108635349 | intron variant                  | MODIFIER | Tmem175 | ENSMUSG00000013495 | Transcript | ENSMUST00000078323 | protein coding          | rs3709503   |
| 5:108635349-108635349 | intron variant                  | MODIFIER | Tmem175 | ENSMUSG00000013495 | Transcript | ENSMUST00000120327 | protein coding          | rs3709503   |
| 5:108635349-108635349 | intron variant                  | MODIFIER | Tmem175 | ENSMUSG00000013495 | Transcript | ENSMUST00000146207 | protein coding          | rs3709503   |
| 5:108635349-108635349 | intron variant                  | MODIFIER | Tmem175 | ENSMUSG00000013495 | Transcript | ENSMUST00000053913 | protein coding          | rs33313275  |
| 5:108635349-108635349 | intron variant                  | MODIFIER | Tmem175 | ENSMUSG00000013495 | Transcript | ENSMUST00000063272 | protein_coding          | rs33313275  |
| 5:108635349-108635349 | downstream_gene_variant         | MODIFIER | Dgkq    | ENSMUSG00000004815 | Transcript | ENSMUST00000053913 | protein_coding          | rs33313275  |
| 5:108635349-108635349 | downstream_gene_variant         | MODIFIER | Tmem175 | ENSMUSG00000013495 | Transcript | ENSMUST00000063272 | protein_coding          | rs33313275  |
| 5:108635349-108635349 | intron_variant,non coding trans | MODIFIER | Dgkq    | ENSMUSG00000004815 | Transcript | ENSMUST00000123669 | retained_intron         | rs33313275  |
| 5:108635349-108635349 | intron_variant,NMD_transcript_v | MODIFIER | Dgkq    | ENSMUSG00000004815 | Transcript | ENSMUST00000132179 | nonsense_mediated_decay | rs33313275  |

|                       |                                   |          |               |                    |                   |                     |                         |             |
|-----------------------|-----------------------------------|----------|---------------|--------------------|-------------------|---------------------|-------------------------|-------------|
| 5:108653568-108653568 | intronic variant,NMD transcript v | MODIFIER | Dgkq          | ENSMUSG00000004815 | Transcript        | ENSMUST00000132708  | nonsense mediated decay | rs33313275  |
| 5:108653568-108653568 | upstream gene variant             | MODIFIER | Dgkq          | ENSMUSG00000004815 | Transcript        | ENSMUST00000139169  | retained intron         | rs33313275  |
| 5:108653568-108653568 | downstream gene variant           | MODIFIER | Dgkq          | ENSMUSG00000004815 | Transcript        | ENSMUST00000139598  | retained intron         | rs33313275  |
| 5:108653568-108653568 | intronic variant,non coding trans | MODIFIER | Dgkq          | ENSMUSG00000004815 | Transcript        | ENSMUST00000144624  | retained intron         | rs33313275  |
| 5:108653568-108653568 | upstream gene variant             | MODIFIER | Dgkq          | ENSMUSG00000004815 | Transcript        | ENSMUST00000145917  | retained intron         | rs33313275  |
| 5:108653568-108653568 | intronic variant,NMD transcript v | MODIFIER | Dgkq          | ENSMUSG00000004815 | Transcript        | ENSMUST00000153238  | nonsense mediated decay | rs33313275  |
| 5:108653568-108653568 | intronic variant,non coding trans | MODIFIER | Dgkq          | ENSMUSG00000004815 | Transcript        | ENSMUST00000153365  | retained intron         | rs33313275  |
| 5:108653568-108653568 | non coding transcript_exon_var    | MODIFIER | Dgkq          | ENSMUSG00000004815 | Transcript        | ENSMUST00000156964  | retained intron         | rs33313275  |
| 5:108653865-108653865 | intronic variant                  | MODIFIER | Dgkq          | ENSMUSG00000004815 | Transcript        | ENSMUST00000053913  | protein coding          | rs29717159  |
| 5:108653865-108653865 | upstream gene variant             | MODIFIER | Dgkq          | ENSMUSG00000004815 | Transcript        | ENSMUST00000123669  | retained intron         | rs29717159  |
| 5:108653865-108653865 | intronic variant,NMD transcript v | MODIFIER | Dgkq          | ENSMUSG00000004815 | Transcript        | ENSMUST00000132179  | nonsense mediated decay | rs29717159  |
| 5:108653865-108653865 | intronic variant,NMD transcript v | MODIFIER | Dgkq          | ENSMUSG00000004815 | Transcript        | ENSMUST00000132708  | nonsense mediated decay | rs29717159  |
| 5:108653865-108653865 | upstream gene variant             | MODIFIER | Dgkq          | ENSMUSG00000004815 | Transcript        | ENSMUST00000139169  | retained intron         | rs29717159  |
| 5:108653865-108653865 | downstream gene variant           | MODIFIER | Dgkq          | ENSMUSG00000004815 | Transcript        | ENSMUST00000139598  | retained intron         | rs29717159  |
| 5:108653865-108653865 | intronic variant,non coding trans | MODIFIER | Dgkq          | ENSMUSG00000004815 | Transcript        | ENSMUST00000144624  | retained intron         | rs29717159  |
| 5:108653865-108653865 | upstream gene variant             | MODIFIER | Dgkq          | ENSMUSG00000004815 | Transcript        | ENSMUST00000145917  | retained intron         | rs29717159  |
| 5:108653865-108653865 | intronic variant,NMD transcript_v | MODIFIER | Dgkq          | ENSMUSG00000004815 | Transcript        | ENSMUST00000153238  | nonsense mediated decay | rs29717159  |
| 5:108653865-108653865 | intronic variant,non coding trans | MODIFIER | Dgkq          | ENSMUSG00000004815 | Transcript        | ENSMUST00000153365  | retained intron         | rs29717159  |
| 5:108653865-108653865 | intronic variant,non coding trans | MODIFIER | Dgkq          | ENSMUSG00000004815 | Transcript        | ENSMUST00000156964  | retained intron         | rs29717159  |
| 5:108681188-108681188 | intronic variant                  | MODIFIER | Idua          | ENSMUSG00000033540 | Transcript        | ENSMUST00000071650  | protein coding          | rs45680768  |
| 5:108681188-108681188 | intronic variant                  | MODIFIER | Idua          | ENSMUSG00000033540 | Transcript        | ENSMUST00000112563  | protein coding          | rs45680768  |
| 5:108681188-108681188 | intronic variant                  | MODIFIER | Idua          | ENSMUSG00000033540 | Transcript        | ENSMUST00000119212  | protein coding          | rs45680768  |
| 5:108681188-108681188 | upstream gene variant             | MODIFIER | Idua          | ENSMUSG00000033540 | Transcript        | ENSMUST00000133482  | retained intron         | rs45680768  |
| 5:108681188-108681188 | intronic variant,NMD transcript v | MODIFIER | Idua          | ENSMUSG00000033540 | Transcript        | ENSMUST00000139734  | nonsense mediated decay | rs45680768  |
| 5:108681188-108681188 | 3 prime UTR variant,NMD trar      | MODIFIER | Idua          | ENSMUSG00000033540 | Transcript        | ENSMUST00000140620  | nonsense mediated decay | rs45680768  |
| 5:108681188-108681188 | intronic variant,non coding trans | MODIFIER | Idua          | ENSMUSG00000033540 | Transcript        | ENSMUST00000151445  | retained intron         | rs45680768  |
| 5:108681188-108681188 | downstream gene variant           | MODIFIER | Idua          | ENSMUSG00000033540 | Transcript        | ENSMUST00000159464  | processed transcript    | rs45680768  |
| 5:109549976-109549976 | downstream gene variant           | MODIFIER | Crif2         | ENSMUSG00000033467 | Transcript        | ENSMUST00000044579  | protein coding          | rs29506578  |
| 5:109549976-109549976 | downstream gene variant           | MODIFIER | Gm8493        | ENSMUSG00000106028 | Transcript        | ENSMUST00000196881  | unprocessed pseudogene  | rs29506578  |
| 5:109549976-109549976 | downstream gene variant           | MODIFIER | Crif2         | ENSMUSG00000033467 | Transcript        | ENSMUST00000198960  | protein coding          | rs29506578  |
| 5:109549976-109549976 | downstream gene variant           | MODIFIER | Crif2         | ENSMUSG00000033467 | Transcript        | ENSMUST00000200284  | protein coding          | rs29506578  |
| 5:109550413-109550413 | downstream gene variant           | MODIFIER | Crif2         | ENSMUSG00000033467 | Transcript        | ENSMUST00000044579  | protein coding          | rs241696506 |
| 5:109550413-109550413 | downstream gene variant           | MODIFIER | Gm8493        | ENSMUSG00000106028 | Transcript        | ENSMUST00000196881  | unprocessed pseudogene  | rs241696506 |
| 5:109550413-109550413 | downstream gene variant           | MODIFIER | Crif2         | ENSMUSG00000033467 | Transcript        | ENSMUST00000198960  | protein coding          | rs241696506 |
| 5:109550413-109550413 | downstream gene variant           | MODIFIER | Crif2         | ENSMUSG00000033467 | Transcript        | ENSMUST00000200284  | protein coding          | rs241696506 |
| 5:109550430-109550430 | downstream gene variant           | MODIFIER | Crif2         | ENSMUSG00000033467 | Transcript        | ENSMUST00000044579  | protein coding          | rs47639059  |
| 5:109550430-109550430 | downstream gene variant           | MODIFIER | Gm8493        | ENSMUSG00000106028 | Transcript        | ENSMUST00000196881  | unprocessed pseudogene  | rs47639059  |
| 5:109550430-109550430 | downstream gene variant           | MODIFIER | Crif2         | ENSMUSG00000033467 | Transcript        | ENSMUST00000198960  | protein coding          | rs47639059  |
| 5:109550430-109550430 | downstream gene variant           | MODIFIER | Crif2         | ENSMUSG00000033467 | Transcript        | ENSMUST00000200284  | protein coding          | rs47639059  |
| 5:109553083-109553083 | downstream gene variant           | MODIFIER | Crif2         | ENSMUSG00000033467 | Transcript        | ENSMUST00000044579  | protein coding          | rs226152806 |
| 5:109553083-109553083 | non coding transcript_exon_var    | MODIFIER | Gm8493        | ENSMUSG00000106028 | Transcript        | ENSMUST00000196881  | unprocessed pseudogene  | rs226152806 |
| 5:109553083-109553083 | downstream gene variant           | MODIFIER | Crif2         | ENSMUSG00000033467 | Transcript        | ENSMUST00000198960  | protein coding          | rs226152806 |
| 5:109553083-109553083 | downstream gene variant           | MODIFIER | Crif2         | ENSMUSG00000033467 | Transcript        | ENSMUST00000200284  | protein coding          | rs226152806 |
| 5:109558102-109558102 | intronic variant                  | MODIFIER | Crif2         | ENSMUSG00000033467 | Transcript        | ENSMUST00000044579  | protein coding          | rs108144015 |
| 5:109558102-109558102 | upstream gene variant             | MODIFIER | Gm8493        | ENSMUSG00000106028 | Transcript        | ENSMUST00000196881  | unprocessed pseudogene  | rs108144015 |
| 5:109558102-109558102 | upstream gene variant             | MODIFIER | Crif2         | ENSMUSG00000033467 | Transcript        | ENSMUST00000198960  | protein coding          | rs108144015 |
| 5:109558102-109558102 | intronic variant                  | MODIFIER | Crif2         | ENSMUSG00000033467 | Transcript        | ENSMUST00000200284  | protein coding          | rs108144015 |
| 5:109558102-109558102 | regulatory region variant         | MODIFIER | -             | -                  | RegulatoryFeature | ENSMUSR00000215036  | promoter                | rs108144015 |
| 5:109558144-109558144 | intronic variant                  | MODIFIER | Crif2         | ENSMUSG00000033467 | Transcript        | ENSMUST00000044579  | protein coding          | rs107637773 |
| 5:109558144-109558144 | upstream gene variant             | MODIFIER | Gm8493        | ENSMUSG00000106028 | Transcript        | ENSMUST00000196881  | unprocessed pseudogene  | rs107637773 |
| 5:109558144-109558144 | upstream gene variant             | MODIFIER | Crif2         | ENSMUSG00000033467 | Transcript        | ENSMUST00000198960  | protein coding          | rs107637773 |
| 5:109558144-109558144 | intronic variant                  | MODIFIER | Crif2         | ENSMUSG00000033467 | Transcript        | ENSMUST00000200284  | protein coding          | rs107637773 |
| 5:109558144-109558144 | regulatory region variant         | MODIFIER | -             | -                  | RegulatoryFeature | ENSMUSR00000215036  | promoter                | rs107637773 |
| 5:109736203-109736203 | downstream gene variant           | MODIFIER | 4930522L14Rik | ENSMUSG00000072762 | Transcript        | ENSMUST00000100937  | protein coding          | rs33578475  |
| 5:109736203-109736203 | missense variant                  | MODERATE | 4930522L14Rik | ENSMUSG00000072762 | Transcript        | ENSMUST00000112547  | protein coding          | rs33578475  |
| 5:109888137-109888137 | intronic variant,non coding trans | MODIFIER | Gm26779       | ENSMUSG00000091740 | Transcript        | ENSMUST00000181101  | lincRNA                 | rs33547875  |
| 5:109888141-109888141 | intronic variant,non coding trans | MODIFIER | Gm26779       | ENSMUSG00000091740 | Transcript        | ENSMUST00000181101  | lincRNA                 | rs33054373  |
| 5:109938534-109938534 | intronic variant                  | MODIFIER | Gm15446       | ENSMUSG00000090015 | Transcript        | ENSMUST00000112544  | protein coding          | rs29549894  |
| 5:109938534-109938534 | intronic variant,non coding trans | MODIFIER | Gm15446       | ENSMUSG00000090015 | Transcript        | ENSMUST00000146564  | retained intron         | rs29549894  |
| 5:109938534-109938534 | upstream gene variant             | MODIFIER | Gm15446       | ENSMUSG00000090015 | Transcript        | ENSMUST00000170826  | protein coding          | rs29549894  |
| 5:110206505-110206505 | intronic variant                  | MODIFIER | Golga3        | ENSMUSG00000029502 | Transcript        | ENSMUST00000031477  | protein coding          | rs33145160  |
| 5:110206505-110206505 | intronic variant                  | MODIFIER | Golga3        | ENSMUSG00000029502 | Transcript        | ENSMUST00000112512  | protein coding          | rs33145160  |
| 5:110206505-110206505 | upstream gene variant             | MODIFIER | Gm43138       | ENSMUSG00000104720 | Transcript        | ENSMUST00000199123  | sense intronic          | rs33145160  |
| 5:110223382-110223382 | downstream gene variant           | MODIFIER | Golga3        | ENSMUSG00000029502 | Transcript        | ENSMUST00000031477  | protein coding          | rs228789455 |
| 5:110223382-110223382 | 3 prime UTR variant               | MODIFIER | Golga3        | ENSMUSG00000029502 | Transcript        | ENSMUST00000112512  | protein coding          | rs228789455 |
| 5:110252610-110252610 | intronic variant                  | MODIFIER | Ankle2        | ENSMUSG00000029501 | Transcript        | ENSMUST000000031474 | protein coding          | rs45815461  |
| 5:110252610-110252610 | intronic variant                  | MODIFIER | Ankle2        | ENSMUSG00000029501 | Transcript        | ENSMUST00000086674  | protein coding          | rs45815461  |
| 5:110252610-110252610 | intronic variant,non coding trans | MODIFIER | Ankle2        | ENSMUSG00000029501 | Transcript        | ENSMUST00000196821  | processed transcript    | rs45815461  |
| 5:110252610-110252610 | intronic variant                  | MODIFIER | Ankle2        | ENSMUSG00000029501 | Transcript        | ENSMUST00000197188  | protein coding          | rs45815461  |

|                       |                                 |          |         |                    |                   |                    |                          |             |
|-----------------------|---------------------------------|----------|---------|--------------------|-------------------|--------------------|--------------------------|-------------|
| 5:110256681-110256681 | downstream gene variant         | MODIFIER | Ankle2  | ENSMUSG00000029501 | Transcript        | ENSMUST00000031474 | protein coding           | rs33244440  |
| 5:110256681-110256681 | downstream_gene_variant         | MODIFIER | Pgam5   | ENSMUSG00000029500 | Transcript        | ENSMUST00000059229 | protein_coding           | rs33244440  |
| 5:110256681-110256681 | downstream_gene_variant         | MODIFIER | Ankle2  | ENSMUSG00000029501 | Transcript        | ENSMUST00000086674 | protein_coding           | rs33244440  |
| 5:110256681-110256681 | downstream_gene_variant         | MODIFIER | Pgam5   | ENSMUSG00000029500 | Transcript        | ENSMUST00000112505 | protein_coding           | rs33244440  |
| 5:110256681-110256681 | upstream gene variant           | MODIFIER | Gm26718 | ENSMUSG00000097367 | Transcript        | ENSMUST00000181048 | lincRNA                  | rs33244440  |
| 5:110256681-110256681 | downstream gene variant         | MODIFIER | Ankle2  | ENSMUSG00000029501 | Transcript        | ENSMUST00000196821 | processed transcript     | rs33244440  |
| 5:110256682-110256682 | downstream_gene_variant         | MODIFIER | Ankle2  | ENSMUSG00000029501 | Transcript        | ENSMUST00000197188 | protein_coding           | rs33244440  |
| 5:110256682-110256682 | downstream_gene_variant         | MODIFIER | Pgam5   | ENSMUSG00000029500 | Transcript        | ENSMUST00000031474 | protein_coding           | rs33559112  |
| 5:110256682-110256682 | downstream_gene_variant         | MODIFIER | Ankle2  | ENSMUSG00000029501 | Transcript        | ENSMUST00000059229 | protein_coding           | rs33559112  |
| 5:110256682-110256682 | downstream_gene_variant         | MODIFIER | Ankle2  | ENSMUSG00000029501 | Transcript        | ENSMUST00000086674 | protein_coding           | rs33559112  |
| 5:110256682-110256682 | downstream gene variant         | MODIFIER | Pgam5   | ENSMUSG00000029500 | Transcript        | ENSMUST00000112505 | protein_coding           | rs33559112  |
| 5:110256682-110256682 | upstream gene variant           | MODIFIER | Gm26718 | ENSMUSG00000097367 | Transcript        | ENSMUST00000181048 | lincRNA                  | rs33559112  |
| 5:110256682-110256682 | downstream gene variant         | MODIFIER | Ankle2  | ENSMUSG00000029501 | Transcript        | ENSMUST00000196821 | processed transcript     | rs33559112  |
| 5:110256682-110256682 | downstream gene variant         | MODIFIER | Ankle2  | ENSMUSG00000029501 | Transcript        | ENSMUST00000197188 | protein_coding           | rs33559112  |
| 5:110256956-110256956 | downstream_gene_variant         | MODIFIER | Ankle2  | ENSMUSG00000029501 | Transcript        | ENSMUST00000031474 | protein_coding           | rs259706371 |
| 5:110256956-110256956 | downstream_gene_variant         | MODIFIER | Pgam5   | ENSMUSG00000029500 | Transcript        | ENSMUST00000059229 | protein_coding           | rs259706371 |
| 5:110256956-110256956 | downstream_gene_variant         | MODIFIER | Ankle2  | ENSMUSG00000029501 | Transcript        | ENSMUST00000086674 | protein_coding           | rs259706371 |
| 5:110256956-110256956 | downstream gene variant         | MODIFIER | Pgam5   | ENSMUSG00000029500 | Transcript        | ENSMUST00000112505 | protein_coding           | rs259706371 |
| 5:110256956-110256956 | upstream gene variant           | MODIFIER | Gm26718 | ENSMUSG00000097367 | Transcript        | ENSMUST00000181048 | lincRNA                  | rs259706371 |
| 5:110256956-110256956 | downstream gene variant         | MODIFIER | Ankle2  | ENSMUSG00000029501 | Transcript        | ENSMUST00000196821 | processed transcript     | rs259706371 |
| 5:110256956-110256956 | downstream_gene_variant         | MODIFIER | Ankle2  | ENSMUSG00000029501 | Transcript        | ENSMUST00000197188 | protein_coding           | rs259706371 |
| 5:110259129-110259129 | downstream_gene_variant         | MODIFIER | Ankle2  | ENSMUSG00000029501 | Transcript        | ENSMUST00000031474 | protein_coding           | rs220792105 |
| 5:110259129-110259129 | downstream_gene_variant         | MODIFIER | Pgam5   | ENSMUSG00000029500 | Transcript        | ENSMUST00000059229 | protein_coding           | rs220792105 |
| 5:110259129-110259129 | downstream gene variant         | MODIFIER | Ankle2  | ENSMUSG00000029501 | Transcript        | ENSMUST00000086674 | protein_coding           | rs220792105 |
| 5:110259129-110259129 | downstream gene variant         | MODIFIER | Pgam5   | ENSMUSG00000029500 | Transcript        | ENSMUST00000112505 | protein_coding           | rs220792105 |
| 5:110259129-110259129 | upstream gene variant           | MODIFIER | Gm15788 | ENSMUSG00000087439 | Transcript        | ENSMUST00000130123 | antisense                | rs220792105 |
| 5:110259129-110259129 | upstream gene variant           | MODIFIER | Gm15788 | ENSMUSG00000087439 | Transcript        | ENSMUST00000140087 | antisense                | rs220792105 |
| 5:110259129-110259129 | upstream_gene_variant           | MODIFIER | Gm26718 | ENSMUSG00000097367 | Transcript        | ENSMUST00000181048 | lincRNA                  | rs220792105 |
| 5:110259129-110259129 | downstream_gene_variant         | MODIFIER | Ankle2  | ENSMUSG00000029501 | Transcript        | ENSMUST00000197188 | protein_coding           | rs220792105 |
| 5:110371988-110371988 | intron_variant                  | MODIFIER | Fbrs1   | ENSMUSG00000043323 | Transcript        | ENSMUST00000056124 | protein_coding           | rs33483783  |
| 5:110371988-110371988 | intron variant                  | MODIFIER | Fbrs1   | ENSMUSG00000043323 | Transcript        | ENSMUST00000069483 | protein_coding           | rs33483783  |
| 5:110371988-110371988 | intron variant,NMD transcript v | MODIFIER | Fbrs1   | ENSMUSG00000043323 | Transcript        | ENSMUST00000196801 | nonsense mediated decay  | rs33483783  |
| 5:110371988-110371988 | intron variant                  | MODIFIER | Fbrs1   | ENSMUSG00000043323 | Transcript        | ENSMUST00000198834 | protein_coding           | rs33483783  |
| 5:110387039-110387039 | 5_prime_UTR_variant             | MODIFIER | Fbrs1   | ENSMUSG00000043323 | Transcript        | ENSMUST00000056124 | protein_coding           | rs33753644  |
| 5:110387039-110387039 | intron_variant                  | MODIFIER | Fbrs1   | ENSMUSG00000043323 | Transcript        | ENSMUST00000069483 | protein_coding           | rs33753644  |
| 5:110387039-110387039 | non_coding_transcript_exon_var  | MODIFIER | Gm26711 | ENSMUSG00000097904 | Transcript        | ENSMUST00000180866 | lincRNA                  | rs33753644  |
| 5:110387039-110387039 | intron variant,NMD transcript v | MODIFIER | Fbrs1   | ENSMUSG00000043323 | Transcript        | ENSMUST00000196801 | nonsense mediated decay  | rs33753644  |
| 5:110387039-110387039 | intron variant                  | MODIFIER | Fbrs1   | ENSMUSG00000043323 | Transcript        | ENSMUST00000198768 | protein_coding           | rs33753644  |
| 5:110387039-110387039 | upstream gene variant           | MODIFIER | Fbrs1   | ENSMUSG00000043323 | Transcript        | ENSMUST00000198834 | protein_coding           | rs33753644  |
| 5:110387039-110387039 | regulatory region variant       | MODIFIER | -       | -                  | RegulatoryFeature | ENSMUSR00000215125 | promoter                 | rs33753644  |
| 5:112304966-112304966 | intron_variant                  | MODIFIER | Tpst2   | ENSMUSG00000029344 | Transcript        | ENSMUST00000031287 | protein_coding           | rs211954909 |
| 5:112304966-112304966 | intron_variant                  | MODIFIER | Tpst2   | ENSMUSG00000029344 | Transcript        | ENSMUST00000071455 | protein_coding           | rs211954909 |
| 5:112304966-112304966 | intron_variant,non_coding_trans | MODIFIER | Tpst2   | ENSMUSG00000029344 | Transcript        | ENSMUST00000134071 | retained_intron          | rs211954909 |
| 5:112304966-112304966 | upstream gene variant           | MODIFIER | Tpst2   | ENSMUSG00000029344 | Transcript        | ENSMUST00000140262 | nonsense mediated decay  | rs211954909 |
| 5:112304966-112304966 | intron variant                  | MODIFIER | Tpst2   | ENSMUSG00000029344 | Transcript        | ENSMUST00000151947 | protein_coding           | rs211954909 |
| 5:112304966-112304966 | intron variant                  | MODIFIER | Tpst2   | ENSMUSG00000029344 | Transcript        | ENSMUST00000198502 | protein_coding           | rs211954909 |
| 5:112689017-112689019 | 3_prime_UTR_variant             | MODIFIER | Myo18b  | ENSMUSG00000072720 | Transcript        | ENSMUST00000086617 | protein_coding           | rs387518323 |
| 5:112689017-112689019 | non_coding_transcript_exon_var  | MODIFIER | Myo18b  | ENSMUSG00000072720 | Transcript        | ENSMUST00000182189 | processed transcript     | rs387518323 |
| 5:112770067-112770067 | intron_variant                  | MODIFIER | Myo18b  | ENSMUSG00000072720 | Transcript        | ENSMUST00000086617 | protein_coding           | rs29563158  |
| 5:112770067-112770067 | upstream gene variant           | MODIFIER | Myo18b  | ENSMUSG00000072720 | Transcript        | ENSMUST00000182189 | processed transcript     | rs29563158  |
| 5:112770067-112770067 | downstream gene variant         | MODIFIER | Myo18b  | ENSMUSG00000072720 | Transcript        | ENSMUST00000183029 | processed transcript     | rs29563158  |
| 5:112770067-112770067 | regulatory region variant       | MODIFIER | -       | -                  | RegulatoryFeature | ENSMUSR00000686922 | promoter flanking region | rs29563158  |
| 5:112809682-112809682 | missense variant                | MODERATE | Myo18b  | ENSMUSG00000072720 | Transcript        | ENSMUST00000086617 | protein_coding           | rs46076017  |
| 5:112809682-112809682 | non_coding_transcript_exon_var  | MODIFIER | Myo18b  | ENSMUSG00000072720 | Transcript        | ENSMUST00000183029 | processed transcript     | rs46076017  |
| 5:112817677-112817677 | missense_variant                | MODERATE | Myo18b  | ENSMUSG00000072720 | Transcript        | ENSMUST00000086617 | protein_coding           | rs45870467  |
| 5:112817677-112817677 | non_coding_transcript_exon_var  | MODIFIER | Myo18b  | ENSMUSG00000072720 | Transcript        | ENSMUST00000183029 | processed transcript     | rs45870467  |
| 5:112817677-112817677 | 3_prime_UTR_variant,NMD trar    | MODIFIER | Myo18b  | ENSMUSG00000072720 | Transcript        | ENSMUST00000183273 | nonsense mediated decay  | rs45870467  |
| 5:113847912-113847912 | intron variant                  | MODIFIER | Coro1c  | ENSMUSG00000004530 | Transcript        | ENSMUST00000004646 | protein_coding           | rs29813178  |
| 5:113847912-113847912 | downstream gene variant         | MODIFIER | Coro1c  | ENSMUSG00000004530 | Transcript        | ENSMUST00000111283 | retained_intron          | rs29813178  |
| 5:113847912-113847912 | intron_variant,non_coding_trans | MODIFIER | Coro1c  | ENSMUSG00000004530 | Transcript        | ENSMUST00000163995 | retained_intron          | rs29813178  |
| 5:113847912-113847912 | intron_variant,NMD transcript_v | MODIFIER | Coro1c  | ENSMUSG00000004530 | Transcript        | ENSMUST00000164980 | nonsense mediated_decay  | rs29813178  |
| 5:113847912-113847912 | downstream_gene_variant         | MODIFIER | Gm17122 | ENSMUSG00000090458 | Transcript        | ENSMUST00000166047 | antisense                | rs29813178  |
| 5:113847912-113847912 | downstream gene variant         | MODIFIER | Coro1c  | ENSMUSG00000004530 | Transcript        | ENSMUST00000166647 | processed transcript     | rs29813178  |
| 5:113847912-113847912 | downstream gene variant         | MODIFIER | Coro1c  | ENSMUSG00000004530 | Transcript        | ENSMUST00000168493 | processed transcript     | rs29813178  |
| 5:113847912-113847912 | intron variant,non coding trans | MODIFIER | Coro1c  | ENSMUSG00000004530 | Transcript        | ENSMUST00000168634 | retained_intron          | rs29813178  |
| 5:113847912-113847912 | upstream gene variant           | MODIFIER | Coro1c  | ENSMUSG00000004530 | Transcript        | ENSMUST00000172016 | retained_intron          | rs29813178  |
| 5:114372651-114372651 | intron_variant                  | MODIFIER | Kctd10  | ENSMUSG00000001098 | Transcript        | ENSMUST00000001125 | protein_coding           | rs29778625  |
| 5:114372651-114372651 | intron_variant                  | MODIFIER | Kctd10  | ENSMUSG00000001098 | Transcript        | ENSMUST00000102581 | protein_coding           | rs29778625  |
| 5:114372651-114372651 | upstream_gene_variant           | MODIFIER | Kctd10  | ENSMUSG00000001098 | Transcript        | ENSMUST00000123538 | retained_intron          | rs29778625  |

|                       |                                 |          |         |                     |                   |                     |                         |            |
|-----------------------|---------------------------------|----------|---------|---------------------|-------------------|---------------------|-------------------------|------------|
| 5:114372651-114372651 | upstream gene variant           | MODIFIER | Kctd10  | ENSMUSG00000001098  | Transcript        | ENSMUST00000132646  | retained intron         | rs29778625 |
| 5:114372651-114372651 | upstream_gene_variant           | MODIFIER | Kctd10  | ENSMUSG00000001098  | Transcript        | ENSMUST00000134173  | processed_transcript    | rs29778625 |
| 5:114372651-114372651 | intron_variant,NMD_transcript_v | MODIFIER | Kctd10  | ENSMUSG00000001098  | Transcript        | ENSMUST00000134532  | nonsense_mediated_decay | rs29778625 |
| 5:114372651-114372651 | upstream_gene_variant           | MODIFIER | Kctd10  | ENSMUSG00000001098  | Transcript        | ENSMUST00000135170  | retained_intron         | rs29778625 |
| 5:125020237-125020237 | intron variant                  | MODIFIER | Ncor2   | ENSMUSG000000029478 | Transcript        | ENSMUST00000055256  | protein coding          | rs33273829 |
| 5:125020237-125020237 | intron variant                  | MODIFIER | Ncor2   | ENSMUSG000000029478 | Transcript        | ENSMUST000000086083 | protein coding          | rs33273829 |
| 5:125020237-125020237 | intron variant                  | MODIFIER | Ncor2   | ENSMUSG000000029478 | Transcript        | ENSMUST00000111393  | protein coding          | rs33273829 |
| 5:125020237-125020237 | intron_variant                  | MODIFIER | Ncor2   | ENSMUSG000000029478 | Transcript        | ENSMUST00000111394  | protein_coding          | rs33273829 |
| 5:125020237-125020237 | intron_variant                  | MODIFIER | Ncor2   | ENSMUSG000000029478 | Transcript        | ENSMUST00000111398  | protein_coding          | rs33273829 |
| 5:125020237-125020237 | intron_variant                  | MODIFIER | Ncor2   | ENSMUSG000000029478 | Transcript        | ENSMUST000000029478 | protein_coding          | rs33273829 |
| 5:125020237-125020237 | intron variant                  | MODIFIER | Ncor2   | ENSMUSG000000029478 | Transcript        | ENSMUST00000114402  | protein_coding          | rs33273829 |
| 5:125020237-125020237 | downstream gene variant         | MODIFIER | Ncor2   | ENSMUSG000000029478 | Transcript        | ENSMUST00000125053  | protein coding          | rs33273829 |
| 5:125020237-125020237 | downstream gene variant         | MODIFIER | Ncor2   | ENSMUSG000000029478 | Transcript        | ENSMUST00000130742  | retained intron         | rs33273829 |
| 5:125020237-125020237 | downstream gene variant         | MODIFIER | Ncor2   | ENSMUSG000000029478 | Transcript        | ENSMUST00000134819  | protein coding          | rs33273829 |
| 5:125020237-125020237 | intron variant                  | MODIFIER | Ncor2   | ENSMUSG000000029478 | Transcript        | ENSMUST00000138890  | protein coding          | rs33273829 |
| 5:125020237-125020237 | intron_variant,non_coding_trans | MODIFIER | Ncor2   | ENSMUSG000000029478 | Transcript        | ENSMUST00000144354  | retained_intron         | rs33273829 |
| 5:125020237-125020237 | intron_variant,NMD_transcript_v | MODIFIER | Ncor2   | ENSMUSG000000029478 | Transcript        | ENSMUST00000200297  | nonsense_mediated_decay | rs33273829 |
| 5:125286080-125286080 | intron_variant                  | MODIFIER | Scarb1  | ENSMUSG000000037936 | Transcript        | ENSMUST000000086075 | protein_coding          | rs3656810  |
| 5:125286080-125286080 | intron variant                  | MODIFIER | Scarb1  | ENSMUSG000000037936 | Transcript        | ENSMUST00000111390  | protein coding          | rs3656810  |
| 5:125286080-125286080 | upstream gene variant           | MODIFIER | Scarb1  | ENSMUSG000000037936 | Transcript        | ENSMUST00000124582  | processed transcript    | rs3656810  |
| 5:125286080-125286080 | intron variant                  | MODIFIER | Scarb1  | ENSMUSG000000037936 | Transcript        | ENSMUST00000127148  | protein coding          | rs3656810  |
| 5:125286080-125286080 | non_coding_transcript_exon_var  | MODIFIER | Scarb1  | ENSMUSG000000037936 | Transcript        | ENSMUST00000135736  | retained_intron         | rs3656810  |
| 5:125286080-125286080 | intron_variant,non_coding_trans | MODIFIER | Scarb1  | ENSMUSG000000037936 | Transcript        | ENSMUST00000148373  | retained_intron         | rs3656810  |
| 5:125286080-125286080 | regulatory_region_variant       | MODIFIER | -       | -                   | RegulatoryFeature | ENSMUSR00000218027  | open_chromatin_region   | rs3656810  |
| 5:125456906-125456906 | 3 prime UTR variant             | MODIFIER | Bri3bp  | ENSMUSG000000037905 | Transcript        | ENSMUST00000049040  | protein coding          | -          |
| 5:125456906-125456906 | downstream gene variant         | MODIFIER | Bri3bp  | ENSMUSG000000037905 | Transcript        | ENSMUST00000198811  | protein coding          | -          |
| 5:125456927-125456927 | 3 prime UTR variant             | MODIFIER | Bri3bp  | ENSMUSG000000037905 | Transcript        | ENSMUST00000049040  | protein coding          | -          |
| 5:125456927-125456927 | downstream gene variant         | MODIFIER | Bri3bp  | ENSMUSG000000037905 | Transcript        | ENSMUST00000198811  | protein coding          | -          |
| 5:127579029-127579029 | non_coding_transcript_exon_var  | MODIFIER | Gm42980 | ENSMUSG000001106015 | Transcript        | ENSMUST00000200582  | lincRNA                 | rs29515128 |
| 5:127590131-127590131 | intergenic_variant              | MODIFIER | -       | -                   | -                 | -                   | -                       | rs29774442 |
| 5:127601606-127601606 | intron_variant                  | MODIFIER | Slc15a4 | ENSMUSG000000029416 | Transcript        | ENSMUST000000031367 | protein_coding          | rs33164285 |
| 5:127601606-127601606 | intron_variant,NMD transcript v | MODIFIER | Slc15a4 | ENSMUSG000000029416 | Transcript        | ENSMUST00000124569  | nonsense mediated decay | rs33164285 |
| 5:127601606-127601606 | downstream gene variant         | MODIFIER | Slc15a4 | ENSMUSG000000029416 | Transcript        | ENSMUST00000144603  | nonsense mediated decay | rs33164285 |
| 5:127601606-127601606 | downstream gene variant         | MODIFIER | Slc15a4 | ENSMUSG000000029416 | Transcript        | ENSMUST00000152727  | protein coding          | rs33164285 |
| 5:127601606-127601606 | intron_variant,NMD_transcript_v | MODIFIER | Slc15a4 | ENSMUSG000000029416 | Transcript        | ENSMUST00000153832  | nonsense_mediated_decay | rs33164285 |
| 5:127601606-127601606 | intron variant                  | MODIFIER | Slc15a4 | ENSMUSG000000029416 | Transcript        | ENSMUST00000198486  | protein_coding          | rs33164285 |
| 5:127601606-127601606 | downstream_gene_variant         | MODIFIER | Slc15a4 | ENSMUSG000000029416 | Transcript        | ENSMUST00000198727  | processed_transcript    | rs33164285 |
| 5:127601606-127601606 | downstream gene variant         | MODIFIER | Slc15a4 | ENSMUSG000000029416 | Transcript        | ENSMUST00000199810  | processed transcript    | rs33164285 |
| 5:127601606-127601606 | downstream gene variant         | MODIFIER | Slc15a4 | ENSMUSG000000029416 | Transcript        | ENSMUST00000200212  | processed transcript    | rs33164285 |
| 5:127607631-127607631 | intron variant                  | MODIFIER | Slc15a4 | ENSMUSG000000029416 | Transcript        | ENSMUST000000031367 | protein coding          | rs29522873 |
| 5:127607631-127607631 | intron_variant,NMD transcript v | MODIFIER | Slc15a4 | ENSMUSG000000029416 | Transcript        | ENSMUST00000124569  | nonsense mediated decay | rs29522873 |
| 5:127607631-127607631 | intron_variant,NMD_transcript_v | MODIFIER | Slc15a4 | ENSMUSG000000029416 | Transcript        | ENSMUST00000144603  | nonsense_mediated_decay | rs29522873 |
| 5:127607631-127607631 | intron variant                  | MODIFIER | Slc15a4 | ENSMUSG000000029416 | Transcript        | ENSMUST00000152727  | protein_coding          | rs29522873 |
| 5:127607631-127607631 | intron_variant,NMD_transcript_v | MODIFIER | Slc15a4 | ENSMUSG000000029416 | Transcript        | ENSMUST00000153832  | nonsense_mediated_decay | rs29522873 |
| 5:127607631-127607631 | downstream gene variant         | MODIFIER | Slc15a4 | ENSMUSG000000029416 | Transcript        | ENSMUST00000155321  | protein coding          | rs29522873 |
| 5:127607631-127607631 | upstream gene variant           | MODIFIER | Slc15a4 | ENSMUSG000000029416 | Transcript        | ENSMUST00000198486  | protein coding          | rs29522873 |
| 5:127607631-127607631 | intron_variant,non coding trans | MODIFIER | Slc15a4 | ENSMUSG000000029416 | Transcript        | ENSMUST00000198727  | processed transcript    | rs29522873 |
| 5:127607631-127607631 | upstream_gene_variant           | MODIFIER | Slc15a4 | ENSMUSG000000029416 | Transcript        | ENSMUST00000199810  | processed_transcript    | rs29522873 |
| 5:127607631-127607631 | upstream_gene_variant           | MODIFIER | Slc15a4 | ENSMUSG000000029416 | Transcript        | ENSMUST00000200212  | processed_transcript    | rs29522873 |
| 5:127610580-127610580 | intron variant                  | MODIFIER | Slc15a4 | ENSMUSG000000029416 | Transcript        | ENSMUST000000031367 | protein_coding          | rs29678741 |
| 5:127610580-127610580 | intron_variant,NMD transcript v | MODIFIER | Slc15a4 | ENSMUSG000000029416 | Transcript        | ENSMUST00000124569  | nonsense mediated decay | rs29678741 |
| 5:127610580-127610580 | intron_variant,NMD_transcript_v | MODIFIER | Slc15a4 | ENSMUSG000000029416 | Transcript        | ENSMUST00000144603  | nonsense mediated decay | rs29678741 |
| 5:127610580-127610580 | upstream gene variant           | MODIFIER | Slc15a4 | ENSMUSG000000029416 | Transcript        | ENSMUST00000152727  | protein coding          | rs29678741 |
| 5:127610580-127610580 | intron variant,NMD transcript v | MODIFIER | Slc15a4 | ENSMUSG000000029416 | Transcript        | ENSMUST00000153832  | nonsense mediated decay | rs29678741 |
| 5:127610580-127610580 | intron variant                  | MODIFIER | Slc15a4 | ENSMUSG000000029416 | Transcript        | ENSMUST00000155321  | protein_coding          | rs29678741 |
| 5:127610580-127610580 | downstream_gene_variant         | MODIFIER | Slc15a4 | ENSMUSG000000029416 | Transcript        | ENSMUST00000182841  | retained_intron         | rs29678741 |
| 5:127610580-127610580 | intron_variant,non_coding_trans | MODIFIER | Slc15a4 | ENSMUSG000000029416 | Transcript        | ENSMUST00000198727  | processed_transcript    | rs29678741 |
| 5:147306965-147306965 | synonymous variant              | LOW      | Cdx2    | ENSMUSG000000029646 | Transcript        | ENSMUST000000031650 | protein coding          | -          |
| 5:147306965-147306965 | regulatory_region_variant       | MODIFIER | -       | -                   | RegulatoryFeature | ENSMUSR000000693977 | open chromatin region   | -          |
| 5:38122706-38122706   | intron variant                  | MODIFIER | Stx18   | ENSMUSG000000029125 | Transcript        | ENSMUST000000031008 | protein coding          | rs29681339 |
| 5:38122706-38122706   | intron_variant                  | MODIFIER | Stx18   | ENSMUSG000000029125 | Transcript        | ENSMUST00000042146  | protein_coding          | rs29681339 |
| 5:38122706-38122706   | intron variant                  | MODIFIER | Stx18   | ENSMUSG000000029125 | Transcript        | ENSMUST00000114126  | protein_coding          | rs29681339 |
| 5:38122706-38122706   | intron_variant                  | MODIFIER | Stx18   | ENSMUSG000000029125 | Transcript        | ENSMUST00000146864  | protein_coding          | rs29681339 |
| 5:38122706-38122706   | intron_variant,non coding trans | MODIFIER | Stx18   | ENSMUSG000000029125 | Transcript        | ENSMUST00000147667  | retained intron         | rs29681339 |
| 5:38122706-38122706   | intron variant                  | MODIFIER | Stx18   | ENSMUSG000000029125 | Transcript        | ENSMUST00000154929  | protein coding          | rs29681339 |
| 5:38122706-38122706   | downstream gene variant         | MODIFIER | Stx18   | ENSMUSG000000029125 | Transcript        | ENSMUST00000201285  | processed transcript    | rs29681339 |
| 5:38125356-38125356   | intron variant                  | MODIFIER | Stx18   | ENSMUSG000000029125 | Transcript        | ENSMUST000000031008 | protein coding          | rs33375845 |
| 5:38125356-38125356   | intron_variant                  | MODIFIER | Stx18   | ENSMUSG000000029125 | Transcript        | ENSMUST000000042146 | protein_coding          | rs33375845 |
| 5:38125356-38125356   | intron variant                  | MODIFIER | Stx18   | ENSMUSG000000029125 | Transcript        | ENSMUST00000114126  | protein_coding          | rs33375845 |
| 5:38125356-38125356   | intron_variant                  | MODIFIER | Stx18   | ENSMUSG000000029125 | Transcript        | ENSMUST00000146864  | protein_coding          | rs33375845 |



|                     |                                 |          |               |                    |            |                     |                         |             |
|---------------------|---------------------------------|----------|---------------|--------------------|------------|---------------------|-------------------------|-------------|
| 5:38125356-38125356 | intron variant,non coding trans | MODIFIER | Stx18         | ENSMUSG00000029125 | Transcript | ENSMUST00000147667  | retained intron         | rs33375845  |
| 5:38125356-38125356 | intron variant                  | MODIFIER | Stx18         | ENSMUSG00000029125 | Transcript | ENSMUST00000154929  | protein_coding          | rs33375845  |
| 5:38125356-38125356 | downstream_gene_variant         | MODIFIER | Stx18         | ENSMUSG00000029125 | Transcript | ENSMUST000000201285 | processed_transcript    | rs33375845  |
| 5:38211303-38211303 | intron variant                  | MODIFIER | Zbtb49        | ENSMUSG00000029127 | Transcript | ENSMUST00000094833  | protein_coding          | rs29542903  |
| 5:38211303-38211303 | downstream_gene_variant         | MODIFIER | Zbtb49        | ENSMUSG00000029127 | Transcript | ENSMUST00000114113  | protein_coding          | rs29542903  |
| 5:38211303-38211303 | intron variant,NMD transcript v | MODIFIER | Zbtb49        | ENSMUSG00000029127 | Transcript | ENSMUST00000123106  | nonsense mediated decay | rs29542903  |
| 5:38211303-38211303 | intron variant,NMD transcript v | MODIFIER | Zbtb49        | ENSMUSG00000029127 | Transcript | ENSMUST00000126267  | nonsense mediated decay | rs29542903  |
| 5:38211303-38211303 | intron_variant,NMD_transcript_v | MODIFIER | Zbtb49        | ENSMUSG00000029127 | Transcript | ENSMUST00000129161  | nonsense_mediated_decay | rs29542903  |
| 5:38211303-38211303 | intron_variant,NMD_transcript_v | MODIFIER | Zbtb49        | ENSMUSG00000029127 | Transcript | ENSMUST00000136475  | nonsense_mediated_decay | rs29542903  |
| 5:38211303-38211303 | downstream_gene_variant         | MODIFIER | Zbtb49        | ENSMUSG00000029127 | Transcript | ENSMUST00000137577  | retained_intron         | rs29542903  |
| 5:38211303-38211303 | intron variant,NMD transcript v | MODIFIER | Zbtb49        | ENSMUSG00000029127 | Transcript | ENSMUST00000138820  | nonsense mediated decay | rs29542903  |
| 5:38211303-38211303 | intron variant,NMD transcript v | MODIFIER | Zbtb49        | ENSMUSG00000029127 | Transcript | ENSMUST00000143436  | nonsense mediated decay | rs29542903  |
| 5:38268113-38268113 | intron variant                  | MODIFIER | Tmem128       | ENSMUSG00000067365 | Transcript | ENSMUST00000087511  | protein_coding          | rs37556015  |
| 5:38268113-38268113 | downstream_gene_variant         | MODIFIER | Tmem128       | ENSMUSG00000067365 | Transcript | ENSMUST00000119047  | protein_coding          | rs37556015  |
| 5:38268113-38268113 | downstream_gene_variant         | MODIFIER | Tmem128       | ENSMUSG00000067365 | Transcript | ENSMUST00000128025  | retained_intron         | rs37556015  |
| 5:38268113-38268113 | downstream_gene_variant         | MODIFIER | Tmem128       | ENSMUSG00000067365 | Transcript | ENSMUST00000142277  | protein_coding          | rs37556015  |
| 5:38268141-38268141 | intron variant                  | MODIFIER | Tmem128       | ENSMUSG00000067365 | Transcript | ENSMUST00000087511  | protein_coding          | rs46052468  |
| 5:38268141-38268141 | downstream_gene_variant         | MODIFIER | Tmem128       | ENSMUSG00000067365 | Transcript | ENSMUST00000119047  | protein_coding          | rs46052468  |
| 5:38268141-38268141 | downstream_gene_variant         | MODIFIER | Tmem128       | ENSMUSG00000067365 | Transcript | ENSMUST00000128025  | retained intron         | rs46052468  |
| 5:38268141-38268141 | downstream_gene_variant         | MODIFIER | Tmem128       | ENSMUSG00000067365 | Transcript | ENSMUST00000142277  | protein_coding          | rs46052468  |
| 5:38351828-38351828 | intron_variant                  | MODIFIER | Slc2a9        | ENSMUSG00000005107 | Transcript | ENSMUST00000005238  | protein_coding          | rs36839087  |
| 5:38351828-38351828 | intron_variant                  | MODIFIER | Slc2a9        | ENSMUSG00000005107 | Transcript | ENSMUST000000067872 | protein_coding          | rs36839087  |
| 5:38351828-38351828 | intron_variant                  | MODIFIER | Slc2a9        | ENSMUSG00000005107 | Transcript | ENSMUST00000067886  | protein_coding          | rs36839087  |
| 5:38351828-38351828 | intron variant,NMD transcript v | MODIFIER | Slc2a9        | ENSMUSG00000005107 | Transcript | ENSMUST00000122970  | nonsense mediated decay | rs36839087  |
| 5:38351828-38351828 | intron variant                  | MODIFIER | Slc2a9        | ENSMUSG00000005107 | Transcript | ENSMUST00000129099  | protein_coding          | rs36839087  |
| 5:38351828-38351828 | intron variant                  | MODIFIER | Slc2a9        | ENSMUSG00000005107 | Transcript | ENSMUST00000143758  | protein_coding          | rs36839087  |
| 5:38351828-38351828 | intron variant                  | MODIFIER | Slc2a9        | ENSMUSG00000005107 | Transcript | ENSMUST00000155634  | protein_coding          | rs36839087  |
| 5:38351828-38351828 | downstream_gene_variant         | MODIFIER | 4930487D11Rik | ENSMUSG00000106932 | Transcript | ENSMUST00000201983  | lincRNA                 | rs36839087  |
| 5:38531909-38531909 | intron_variant                  | MODIFIER | Wdr1          | ENSMUSG00000005103 | Transcript | ENSMUST00000005234  | protein_coding          | -           |
| 5:38531909-38531909 | upstream_gene_variant           | MODIFIER | Wdr1          | ENSMUSG00000005103 | Transcript | ENSMUST00000200909  | retained_intron         | -           |
| 5:38531909-38531909 | upstream gene variant           | MODIFIER | Wdr1          | ENSMUSG00000005103 | Transcript | ENSMUST00000201059  | retained intron         | -           |
| 5:38531909-38531909 | intron variant                  | MODIFIER | Wdr1          | ENSMUSG00000005103 | Transcript | ENSMUST00000201260  | protein_coding          | -           |
| 5:38531909-38531909 | upstream gene variant           | MODIFIER | Wdr1          | ENSMUSG00000005103 | Transcript | ENSMUST00000201538  | retained intron         | -           |
| 5:38531909-38531909 | intron_variant,non_coding_trans | MODIFIER | Wdr1          | ENSMUSG00000005103 | Transcript | ENSMUST00000202496  | processed_transcript    | -           |
| 5:38531979-38531979 | intron_variant                  | MODIFIER | Wdr1          | ENSMUSG00000005103 | Transcript | ENSMUST00000005234  | protein_coding          | rs243749148 |
| 5:38531979-38531979 | upstream_gene_variant           | MODIFIER | Wdr1          | ENSMUSG00000005103 | Transcript | ENSMUST00000200909  | retained_intron         | rs243749148 |
| 5:38531979-38531979 | upstream gene variant           | MODIFIER | Wdr1          | ENSMUSG00000005103 | Transcript | ENSMUST00000201059  | retained intron         | rs243749148 |
| 5:38531979-38531979 | intron variant                  | MODIFIER | Wdr1          | ENSMUSG00000005103 | Transcript | ENSMUST00000201260  | protein_coding          | rs243749148 |
| 5:38531979-38531979 | upstream gene variant           | MODIFIER | Wdr1          | ENSMUSG00000005103 | Transcript | ENSMUST00000201538  | retained intron         | rs243749148 |
| 5:38531979-38531979 | non coding transcript exon var  | MODIFIER | Wdr1          | ENSMUSG00000005103 | Transcript | ENSMUST00000202496  | processed transcript    | rs243749148 |
| 5:49960118-49960118 | 3_prime_UTR_variant             | MODIFIER | Adgr3         | ENSMUSG00000029090 | Transcript | ENSMUST00000030971  | protein_coding          | rs33640639  |
| 5:52666677-52666677 | intron_variant                  | MODIFIER | Sepsecs       | ENSMUSG00000029173 | Transcript | ENSMUST00000031069  | protein_coding          | -           |
| 5:52666677-52666677 | intron_variant,NMD_transcript_v | MODIFIER | Sepsecs       | ENSMUSG00000029173 | Transcript | ENSMUST00000123856  | nonsense mediated decay | -           |
| 5:52666677-52666677 | upstream gene variant           | MODIFIER | Sepsecs       | ENSMUSG00000029173 | Transcript | ENSMUST00000126574  | nonsense mediated decay | -           |
| 5:52666677-52666677 | intron variant,NMD transcript v | MODIFIER | Sepsecs       | ENSMUSG00000029173 | Transcript | ENSMUST00000150709  | nonsense mediated decay | -           |
| 5:52757098-52757098 | intron variant                  | MODIFIER | Pi4k2b        | ENSMUSG00000029186 | Transcript | ENSMUST00000031081  | protein_coding          | rs32953577  |
| 5:52757098-52757098 | intron_variant                  | MODIFIER | Pi4k2b        | ENSMUSG00000029186 | Transcript | ENSMUST00000031082  | protein_coding          | rs32953577  |
| 5:52757098-52757098 | non_coding_transcript_exon_var  | MODIFIER | Pi4k2b        | ENSMUSG00000029186 | Transcript | ENSMUST00000145825  | retained_intron         | rs32953577  |
| 5:52758728-52758728 | intron_variant                  | MODIFIER | Pi4k2b        | ENSMUSG00000029186 | Transcript | ENSMUST00000031081  | protein_coding          | rs51448018  |
| 5:52758728-52758728 | intron variant                  | MODIFIER | Pi4k2b        | ENSMUSG00000029186 | Transcript | ENSMUST00000031082  | protein_coding          | rs51448018  |
| 5:52758728-52758728 | downstream_gene_variant         | MODIFIER | Pi4k2b        | ENSMUSG00000029186 | Transcript | ENSMUST00000145825  | retained intron         | rs51448018  |
| 5:52759544-52759544 | intron variant                  | MODIFIER | Pi4k2b        | ENSMUSG00000029186 | Transcript | ENSMUST00000031081  | protein_coding          | rs46981522  |
| 5:52759544-52759544 | intron variant                  | MODIFIER | Pi4k2b        | ENSMUSG00000029186 | Transcript | ENSMUST00000031082  | protein_coding          | rs46981522  |
| 5:52759544-52759544 | downstream_gene_variant         | MODIFIER | Pi4k2b        | ENSMUSG00000029186 | Transcript | ENSMUST00000145825  | retained_intron         | rs46981522  |
| 5:53662296-53662296 | downstream_gene_variant         | MODIFIER | Rbpj          | ENSMUSG00000039191 | Transcript | ENSMUST00000037618  | protein_coding          | rs33570940  |
| 5:53662296-53662296 | downstream_gene_variant         | MODIFIER | Rbpj          | ENSMUSG00000039191 | Transcript | ENSMUST00000087360  | protein_coding          | rs33570940  |
| 5:53662296-53662296 | downstream_gene_variant         | MODIFIER | Rbpj          | ENSMUSG00000039191 | Transcript | ENSMUST00000113865  | protein_coding          | rs33570940  |
| 5:53662296-53662296 | downstream gene variant         | MODIFIER | Rbpj          | ENSMUSG00000039191 | Transcript | ENSMUST00000201912  | protein_coding          | rs33570940  |
| 5:53662329-53662329 | downstream gene variant         | MODIFIER | Rbpj          | ENSMUSG00000039191 | Transcript | ENSMUST00000037618  | protein_coding          | rs29730820  |
| 5:53662329-53662329 | downstream_gene_variant         | MODIFIER | Rbpj          | ENSMUSG00000039191 | Transcript | ENSMUST00000087360  | protein_coding          | rs29730820  |
| 5:53662329-53662329 | downstream_gene_variant         | MODIFIER | Rbpj          | ENSMUSG00000039191 | Transcript | ENSMUST00000113865  | protein_coding          | rs29730820  |
| 5:53662329-53662329 | downstream_gene_variant         | MODIFIER | Rbpj          | ENSMUSG00000039191 | Transcript | ENSMUST00000201912  | protein_coding          | rs29730820  |
| 5:57729016-57729016 | 3 prime UTR variant             | MODIFIER | Pcdh7         | ENSMUSG00000029108 | Transcript | ENSMUST00000068110  | protein_coding          | rs33452154  |
| 5:57729016-57729016 | intron variant                  | MODIFIER | Pcdh7         | ENSMUSG00000029108 | Transcript | ENSMUST00000094783  | protein_coding          | rs33452154  |
| 5:57729016-57729016 | intron variant                  | MODIFIER | Pcdh7         | ENSMUSG00000029108 | Transcript | ENSMUST00000191837  | protein_coding          | rs33452154  |
| 5:57729016-57729016 | intron variant                  | MODIFIER | Pcdh7         | ENSMUSG00000029108 | Transcript | ENSMUST00000192048  | protein_coding          | rs33452154  |
| 5:57729016-57729016 | intron_variant                  | MODIFIER | Pcdh7         | ENSMUSG00000029108 | Transcript | ENSMUST00000192287  | protein_coding          | rs33452154  |
| 5:57729016-57729016 | intron_variant,NMD_transcript_v | MODIFIER | Pcdh7         | ENSMUSG00000029108 | Transcript | ENSMUST00000195156  | nonsense mediated decay | rs33452154  |
| 5:57729016-57729016 | intron_variant                  | MODIFIER | Pcdh7         | ENSMUSG00000029108 | Transcript | ENSMUST00000199310  | protein_coding          | rs33452154  |

|                     |                                       |          |          |                    |                   |                    |                          |             |
|---------------------|---------------------------------------|----------|----------|--------------------|-------------------|--------------------|--------------------------|-------------|
| 5:57729016-57729016 | downstream gene variant               | MODIFIER | Gm42635  | ENSMUSG00000105940 | Transcript        | ENSMUST00000200266 | TEC                      | rs33452154  |
| 5:58129507-58129507 | downstream_gene_variant               | MODIFIER | Pcdh7    | ENSMUSG00000029108 | Transcript        | ENSMUST00000094783 | protein_coding           | rs33645796  |
| 5:58129507-58129507 | 3_prime_UTR_variant                   | MODIFIER | Pcdh7    | ENSMUSG00000029108 | Transcript        | ENSMUST00000191837 | protein_coding           | rs33645796  |
| 5:58129507-58129507 | downstream_gene_variant               | MODIFIER | Pcdh7    | ENSMUSG00000029108 | Transcript        | ENSMUST00000192048 | protein_coding           | rs33645796  |
| 5:58129507-58129507 | 3_prime_UTR_variant,NMD trans         | MODIFIER | Pcdh7    | ENSMUSG00000029108 | Transcript        | ENSMUST00000195156 | nonsense mediated decay  | rs33645796  |
| 5:58129507-58129507 | downstream gene variant               | MODIFIER | Gm42486  | ENSMUSG00000105049 | Transcript        | ENSMUST00000200369 | TEC                      | rs33645796  |
| 5:58130500-58130500 | downstream gene variant               | MODIFIER | Pcdh7    | ENSMUSG00000029108 | Transcript        | ENSMUST00000094783 | protein_coding           | rs37407901  |
| 5:58130500-58130500 | 3_prime_UTR_variant                   | MODIFIER | Pcdh7    | ENSMUSG00000029108 | Transcript        | ENSMUST00000191837 | protein_coding           | rs37407901  |
| 5:58130500-58130500 | downstream_gene_variant               | MODIFIER | Pcdh7    | ENSMUSG00000029108 | Transcript        | ENSMUST00000192048 | protein_coding           | rs37407901  |
| 5:58130500-58130500 | downstream_gene_variant               | MODIFIER | Pcdh7    | ENSMUSG00000029108 | Transcript        | ENSMUST00000195156 | nonsense mediated decay  | rs37407901  |
| 5:58132252-58132252 | downstream gene variant               | MODIFIER | Pcdh7    | ENSMUSG00000029108 | Transcript        | ENSMUST00000094783 | protein_coding           | rs244488738 |
| 5:58132252-58132252 | 3_prime_UTR_variant                   | MODIFIER | Pcdh7    | ENSMUSG00000029108 | Transcript        | ENSMUST00000191837 | protein_coding           | rs244488738 |
| 5:58132252-58132252 | downstream gene variant               | MODIFIER | Pcdh7    | ENSMUSG00000029108 | Transcript        | ENSMUST00000192048 | protein_coding           | rs244488738 |
| 5:58132252-58132252 | downstream gene variant               | MODIFIER | Pcdh7    | ENSMUSG00000029108 | Transcript        | ENSMUST00000195156 | nonsense mediated decay  | rs244488738 |
| 5:58132655-58132655 | downstream_gene_variant               | MODIFIER | Pcdh7    | ENSMUSG00000029108 | Transcript        | ENSMUST00000094783 | protein_coding           | rs33729500  |
| 5:58132655-58132655 | 3_prime_UTR_variant                   | MODIFIER | Pcdh7    | ENSMUSG00000029108 | Transcript        | ENSMUST00000191837 | protein_coding           | rs33729500  |
| 5:58132655-58132655 | downstream_gene_variant               | MODIFIER | Pcdh7    | ENSMUSG00000029108 | Transcript        | ENSMUST00000192048 | protein_coding           | rs33729500  |
| 5:58132655-58132655 | downstream gene variant               | MODIFIER | Pcdh7    | ENSMUSG00000029108 | Transcript        | ENSMUST00000195156 | nonsense mediated decay  | rs33729500  |
| 5:64338294-64338294 | intron variant                        | MODIFIER | Tbc1d1   | ENSMUSG00000029174 | Transcript        | ENSMUST00000043893 | protein_coding           | rs243905008 |
| 5:64338294-64338294 | intron variant                        | MODIFIER | Tbc1d1   | ENSMUSG00000029174 | Transcript        | ENSMUST00000101195 | protein_coding           | rs243905008 |
| 5:64338294-64338294 | intron_variant                        | MODIFIER | Tbc1d1   | ENSMUSG00000029174 | Transcript        | ENSMUST00000119756 | protein_coding           | rs243905008 |
| 5:64338294-64338294 | intron_variant                        | MODIFIER | Tbc1d1   | ENSMUSG00000029174 | Transcript        | ENSMUST00000121370 | protein_coding           | rs243905008 |
| 5:64338294-64338294 | intron_variant,non_coding_trans       | MODIFIER | Tbc1d1   | ENSMUSG00000029174 | Transcript        | ENSMUST00000140960 | processed_transcript     | rs243905008 |
| 5:64338294-64338294 | regulatory region variant             | MODIFIER | -        | -                  | RegulatoryFeature | ENSMUSR00000209865 | promoter flanking region | rs243905008 |
| 5:64338295-64338295 | intron variant                        | MODIFIER | Tbc1d1   | ENSMUSG00000029174 | Transcript        | ENSMUST00000043893 | protein_coding           | -           |
| 5:64338295-64338295 | intron variant                        | MODIFIER | Tbc1d1   | ENSMUSG00000029174 | Transcript        | ENSMUST00000101195 | protein_coding           | -           |
| 5:64338295-64338295 | intron variant                        | MODIFIER | Tbc1d1   | ENSMUSG00000029174 | Transcript        | ENSMUST00000119756 | protein_coding           | -           |
| 5:64338295-64338295 | intron_variant                        | MODIFIER | Tbc1d1   | ENSMUSG00000029174 | Transcript        | ENSMUST00000121370 | protein_coding           | -           |
| 5:64338295-64338295 | intron_variant,non_coding_trans       | MODIFIER | Tbc1d1   | ENSMUSG00000029174 | Transcript        | ENSMUST00000140960 | processed_transcript     | -           |
| 5:64338295-64338295 | regulatory_region_variant             | MODIFIER | -        | -                  | RegulatoryFeature | ENSMUSR00000209865 | promoter flanking region | -           |
| 5:64339486-64339486 | intron variant                        | MODIFIER | Tbc1d1   | ENSMUSG00000029174 | Transcript        | ENSMUST00000043893 | protein_coding           | rs30578598  |
| 5:64339486-64339486 | intron variant                        | MODIFIER | Tbc1d1   | ENSMUSG00000029174 | Transcript        | ENSMUST00000101195 | protein_coding           | rs30578598  |
| 5:64339486-64339486 | intron variant                        | MODIFIER | Tbc1d1   | ENSMUSG00000029174 | Transcript        | ENSMUST00000119756 | protein_coding           | rs30578598  |
| 5:64339486-64339486 | intron_variant                        | MODIFIER | Tbc1d1   | ENSMUSG00000029174 | Transcript        | ENSMUST00000121370 | protein_coding           | rs30578598  |
| 5:64339486-64339486 | intron_variant,non_coding_trans       | MODIFIER | Tbc1d1   | ENSMUSG00000029174 | Transcript        | ENSMUST00000140960 | processed_transcript     | rs30578598  |
| 5:64339486-64339486 | regulatory_region_variant             | MODIFIER | -        | -                  | RegulatoryFeature | ENSMUSR00000209865 | promoter flanking region | rs30578598  |
| 5:64349714-64349714 | intron variant                        | MODIFIER | Tbc1d1   | ENSMUSG00000029174 | Transcript        | ENSMUST00000043893 | protein_coding           | rs48297543  |
| 5:64349714-64349714 | intron variant                        | MODIFIER | Tbc1d1   | ENSMUSG00000029174 | Transcript        | ENSMUST00000101195 | protein_coding           | rs48297543  |
| 5:64349714-64349714 | intron variant                        | MODIFIER | Tbc1d1   | ENSMUSG00000029174 | Transcript        | ENSMUST00000119756 | protein_coding           | rs48297543  |
| 5:64349714-64349714 | intron variant                        | MODIFIER | Tbc1d1   | ENSMUSG00000029174 | Transcript        | ENSMUST00000121370 | protein_coding           | rs48297543  |
| 5:64349714-64349714 | intron_variant,non_coding_trans       | MODIFIER | Tbc1d1   | ENSMUSG00000029174 | Transcript        | ENSMUST00000140960 | processed_transcript     | rs48297543  |
| 5:64929067-64929067 | intron_variant                        | MODIFIER | Tir1     | ENSMUSG00000044827 | Transcript        | ENSMUST00000059349 | protein_coding           | rs226042033 |
| 5:64929067-64929067 | intron_variant                        | MODIFIER | Tir1     | ENSMUSG00000044827 | Transcript        | ENSMUST00000197315 | protein_coding           | rs226042033 |
| 5:64929067-64929067 | downstream gene variant               | MODIFIER | Tir1     | ENSMUSG00000044827 | Transcript        | ENSMUST00000197886 | processed_transcript     | rs226042033 |
| 5:65019083-65019083 | intron variant                        | MODIFIER | Fam114a1 | ENSMUSG00000029185 | Transcript        | ENSMUST00000031080 | protein_coding           | rs31447051  |
| 5:65019083-65019083 | regulatory region variant             | MODIFIER | -        | -                  | RegulatoryFeature | ENSMUSR00000210050 | promoter flanking region | rs31447051  |
| 5:65039522-65039522 | intron_variant                        | MODIFIER | Fam114a1 | ENSMUSG00000029185 | Transcript        | ENSMUST00000031080 | protein_coding           | rs31451154  |
| 5:65039522-65039522 | regulatory_region_variant             | MODIFIER | -        | -                  | RegulatoryFeature | ENSMUSR00000210055 | promoter flanking region | rs31451154  |
| 5:65039757-65039757 | intron_variant                        | MODIFIER | Fam114a1 | ENSMUSG00000029185 | Transcript        | ENSMUST00000031080 | protein_coding           | rs31451156  |
| 5:65039757-65039757 | regulatory region variant             | MODIFIER | -        | -                  | RegulatoryFeature | ENSMUSR00000210055 | promoter flanking region | rs31451156  |
| 5:65040336-65040336 | intron variant                        | MODIFIER | Fam114a1 | ENSMUSG00000029185 | Transcript        | ENSMUST00000031080 | protein_coding           | rs46234798  |
| 5:65041850-65041850 | 3_prime_UTR_variant                   | MODIFIER | Fam114a1 | ENSMUSG00000029185 | Transcript        | ENSMUST00000031080 | protein_coding           | rs31451161  |
| 5:65041865-65041865 | 3_prime_UTR_variant                   | MODIFIER | Fam114a1 | ENSMUSG00000029185 | Transcript        | ENSMUST00000031080 | protein_coding           | rs31451162  |
| 5:65156051-65156051 | splice_region_variant,intron_variant  | LOW      | Klh5     | ENSMUSG00000054920 | Transcript        | ENSMUST00000101191 | protein_coding           | rs31448857  |
| 5:65156051-65156051 | upstream_gene_variant                 | MODIFIER | Klh5     | ENSMUSG00000054920 | Transcript        | ENSMUST00000203538 | nonsense mediated decay  | rs31448857  |
| 5:65156051-65156051 | downstream_gene_variant               | MODIFIER | Klh5     | ENSMUSG00000054920 | Transcript        | ENSMUST00000203561 | processed_transcript     | rs31448857  |
| 5:65156051-65156051 | splice region variant,intron variant  | LOW      | Klh5     | ENSMUSG00000054920 | Transcript        | ENSMUST00000204097 | protein_coding           | rs31448857  |
| 5:65156051-65156051 | splice region variant,intron variant  | LOW      | Klh5     | ENSMUSG00000054920 | Transcript        | ENSMUST00000204348 | protein_coding           | rs31448857  |
| 5:65156491-65156491 | intron variant                        | MODIFIER | Klh5     | ENSMUSG00000054920 | Transcript        | ENSMUST00000101191 | protein_coding           | rs29732267  |
| 5:65156491-65156491 | intron_variant,NMD_transcript_variant | MODIFIER | Klh5     | ENSMUSG00000054920 | Transcript        | ENSMUST00000203538 | nonsense mediated decay  | rs29732267  |
| 5:65156491-65156491 | downstream_gene_variant               | MODIFIER | Klh5     | ENSMUSG00000054920 | Transcript        | ENSMUST00000203561 | processed_transcript     | rs29732267  |
| 5:65156491-65156491 | intron_variant                        | MODIFIER | Klh5     | ENSMUSG00000054920 | Transcript        | ENSMUST00000204097 | protein_coding           | rs29732267  |
| 5:65156491-65156491 | intron variant                        | MODIFIER | Klh5     | ENSMUSG00000054920 | Transcript        | ENSMUST00000204348 | protein_coding           | rs29732267  |
| 5:65157240-65157243 | intron variant                        | MODIFIER | Klh5     | ENSMUSG00000054920 | Transcript        | ENSMUST00000101191 | protein_coding           | rs387788566 |
| 5:65157240-65157243 | intron variant,NMD_transcript_variant | MODIFIER | Klh5     | ENSMUSG00000054920 | Transcript        | ENSMUST00000203538 | nonsense mediated decay  | rs387788566 |
| 5:65157240-65157243 | downstream gene variant               | MODIFIER | Klh5     | ENSMUSG00000054920 | Transcript        | ENSMUST00000203561 | processed_transcript     | rs387788566 |
| 5:65157240-65157243 | intron_variant                        | MODIFIER | Klh5     | ENSMUSG00000054920 | Transcript        | ENSMUST00000204097 | protein_coding           | rs387788566 |
| 5:65157240-65157243 | intron variant                        | MODIFIER | Klh5     | ENSMUSG00000054920 | Transcript        | ENSMUST00000204348 | protein_coding           | rs387788566 |
| 5:65157240-65157243 | regulatory_region_variant             | MODIFIER | -        | -                  | RegulatoryFeature | ENSMUSR00000210091 | promoter flanking region | rs387788566 |

|                     |                                 |          |               |                    |                   |                    |                         |             |
|---------------------|---------------------------------|----------|---------------|--------------------|-------------------|--------------------|-------------------------|-------------|
| 5:65279005-65279005 | intron variant                  | MODIFIER | Rfc1          | ENSMUSG00000029191 | Transcript        | ENSMUST00000172732 | protein coding          | rs31456859  |
| 5:65279005-65279005 | intron_variant                  | MODIFIER | Rfc1          | ENSMUSG00000029191 | Transcript        | ENSMUST00000203471 | protein_coding          | rs31456859  |
| 5:65279005-65279005 | intron variant                  | MODIFIER | Rfc1          | ENSMUSG00000029191 | Transcript        | ENSMUST00000203581 | protein_coding          | rs31456859  |
| 5:65279005-65279005 | intron variant                  | MODIFIER | Rfc1          | ENSMUSG00000029191 | Transcript        | ENSMUST00000204965 | protein_coding          | rs31456859  |
| 5:65422523-65422527 | intron variant                  | MODIFIER | Ugdh          | ENSMUSG00000029201 | Transcript        | ENSMUST00000031103 | protein_coding          | rs232450249 |
| 5:65422523-65422527 | non coding transcript exon var  | MODIFIER | Ugdh          | ENSMUSG00000029201 | Transcript        | ENSMUST00000125375 | retained intron         | rs232450249 |
| 5:65422523-65422527 | downstream gene variant         | MODIFIER | Ugdh          | ENSMUSG00000029201 | Transcript        | ENSMUST00000131263 | protein_coding          | rs232450249 |
| 5:65422523-65422527 | intron_variant,non_coding_trans | MODIFIER | Ugdh          | ENSMUSG00000029201 | Transcript        | ENSMUST00000139402 | retained_intron         | rs232450249 |
| 5:65422523-65422527 | downstream_gene_variant         | MODIFIER | Gm43552       | ENSMUSG00000105835 | Transcript        | ENSMUST00000196121 | protein_coding          | rs232450249 |
| 5:65461285-65461285 | intron_variant,NMD_transcript_v | MODIFIER | Smim14        | ENSMUSG00000037822 | Transcript        | ENSMUST00000040532 | nonsense_mediated_decay | rs244398578 |
| 5:65461285-65461285 | intron variant                  | MODIFIER | Smim14        | ENSMUSG00000037822 | Transcript        | ENSMUST00000121661 | protein_coding          | rs244398578 |
| 5:65461285-65461285 | non coding transcript exon var  | MODIFIER | Smim14        | ENSMUSG00000037822 | Transcript        | ENSMUST00000135258 | retained intron         | rs244398578 |
| 5:65461285-65461285 | intron variant                  | MODIFIER | Smim14        | ENSMUSG00000037822 | Transcript        | ENSMUST00000139122 | protein_coding          | rs244398578 |
| 5:65461285-65461285 | intron variant                  | MODIFIER | Smim14        | ENSMUSG00000037822 | Transcript        | ENSMUST00000149167 | protein_coding          | rs244398578 |
| 5:65461285-65461285 | intron variant                  | MODIFIER | Gm43552       | ENSMUSG00000105835 | Transcript        | ENSMUST00000196121 | protein_coding          | rs244398578 |
| 5:65461285-65461285 | upstream_gene_variant           | MODIFIER | Smim14        | ENSMUSG00000037822 | Transcript        | ENSMUST00000200111 | retained_intron         | rs244398578 |
| 5:65490511-65490511 | intron_variant,NMD_transcript_v | MODIFIER | Smim14        | ENSMUSG00000037822 | Transcript        | ENSMUST00000040532 | nonsense_mediated_decay | rs33154886  |
| 5:65490511-65490511 | intron variant                  | MODIFIER | Smim14        | ENSMUSG00000037822 | Transcript        | ENSMUST00000121661 | protein_coding          | rs33154886  |
| 5:65490511-65490511 | intron variant,non_coding_trans | MODIFIER | Smim14        | ENSMUSG00000037822 | Transcript        | ENSMUST00000125954 | retained intron         | rs33154886  |
| 5:65490511-65490511 | intron variant                  | MODIFIER | Smim14        | ENSMUSG00000037822 | Transcript        | ENSMUST00000139122 | protein_coding          | rs33154886  |
| 5:65490511-65490511 | intron_variant,non_coding_trans | MODIFIER | Smim14        | ENSMUSG00000037822 | Transcript        | ENSMUST00000144562 | retained_intron         | rs33154886  |
| 5:65490511-65490511 | intron variant                  | MODIFIER | Smim14        | ENSMUSG00000037822 | Transcript        | ENSMUST00000149167 | protein_coding          | rs33154886  |
| 5:65490511-65490511 | intron variant                  | MODIFIER | Gm43552       | ENSMUSG00000105835 | Transcript        | ENSMUST00000196121 | protein_coding          | rs33154886  |
| 5:65490511-65490511 | non coding transcript exon var  | MODIFIER | Smim14        | ENSMUSG00000037822 | Transcript        | ENSMUST00000198981 | retained intron         | rs33154886  |
| 5:65490511-65490511 | upstream gene variant           | MODIFIER | 4930589O11Rik | ENSMUSG00000107195 | Transcript        | ENSMUST00000200768 | TEC                     | rs33154886  |
| 5:65490511-65490511 | regulatory region variant       | MODIFIER | -             | -                  | RegulatoryFeature | ENSMUSR00000681560 | promoter                | rs33154886  |
| 5:65490512-65490512 | intron variant,NMD_transcript_v | MODIFIER | Smim14        | ENSMUSG00000037822 | Transcript        | ENSMUST00000040532 | nonsense_mediated_decay | rs33417098  |
| 5:65490512-65490512 | intron variant                  | MODIFIER | Smim14        | ENSMUSG00000037822 | Transcript        | ENSMUST00000121661 | protein_coding          | rs33417098  |
| 5:65490512-65490512 | intron_variant,non_coding_trans | MODIFIER | Smim14        | ENSMUSG00000037822 | Transcript        | ENSMUST00000125954 | retained_intron         | rs33417098  |
| 5:65490512-65490512 | intron variant                  | MODIFIER | Smim14        | ENSMUSG00000037822 | Transcript        | ENSMUST00000139122 | protein_coding          | rs33417098  |
| 5:65490512-65490512 | intron variant,non_coding_trans | MODIFIER | Smim14        | ENSMUSG00000037822 | Transcript        | ENSMUST00000144562 | retained intron         | rs33417098  |
| 5:65490512-65490512 | intron variant                  | MODIFIER | Smim14        | ENSMUSG00000037822 | Transcript        | ENSMUST00000149167 | protein_coding          | rs33417098  |
| 5:65490512-65490512 | intron variant                  | MODIFIER | Gm43552       | ENSMUSG00000105835 | Transcript        | ENSMUST00000196121 | protein_coding          | rs33417098  |
| 5:65490512-65490512 | non_coding_transcript_exon_var  | MODIFIER | Smim14        | ENSMUSG00000037822 | Transcript        | ENSMUST00000198981 | retained_intron         | rs33417098  |
| 5:65490512-65490512 | upstream_gene_variant           | MODIFIER | 4930589O11Rik | ENSMUSG00000107195 | Transcript        | ENSMUST00000200768 | TEC                     | rs33417098  |
| 5:65490512-65490512 | regulatory_region_variant       | MODIFIER | -             | -                  | RegulatoryFeature | ENSMUSR00000681560 | promoter                | rs33417098  |
| 5:65606089-65606089 | non coding transcript exon var  | MODIFIER | Pds5a         | ENSMUSG00000029202 | Transcript        | ENSMUST00000201673 | retained intron         | rs31458533  |
| 5:65606089-65606089 | 3 prime UTR variant             | MODIFIER | Pds5a         | ENSMUSG00000029202 | Transcript        | ENSMUST00000201948 | protein_coding          | rs31458533  |
| 5:65606089-65606089 | downstream gene variant         | MODIFIER | Pds5a         | ENSMUSG00000029202 | Transcript        | ENSMUST00000202648 | protein_coding          | rs31458533  |
| 5:65779987-65779987 | intron variant                  | MODIFIER | N4bp2         | ENSMUSG00000037795 | Transcript        | ENSMUST00000087264 | protein_coding          | rs33590837  |
| 5:65779987-65779987 | downstream_gene_variant         | MODIFIER | Gm24346       | ENSMUSG00000089337 | Transcript        | ENSMUST00000158712 | snoRNA                  | rs33590837  |
| 5:65779987-65779987 | non_coding_transcript_exon_var  | MODIFIER | Gm42648       | ENSMUSG00000106682 | Transcript        | ENSMUST00000200774 | TEC                     | rs33590837  |
| 5:65779987-65779987 | intron variant                  | MODIFIER | N4bp2         | ENSMUSG00000037795 | Transcript        | ENSMUST00000201489 | protein_coding          | rs33590837  |
| 5:65779987-65779987 | downstream gene variant         | MODIFIER | N4bp2         | ENSMUSG00000037795 | Transcript        | ENSMUST00000201503 | retained intron         | rs33590837  |
| 5:65779987-65779987 | intron variant                  | MODIFIER | N4bp2         | ENSMUSG00000037795 | Transcript        | ENSMUST00000201615 | protein_coding          | rs33590837  |
| 5:65779987-65779987 | upstream gene variant           | MODIFIER | N4bp2         | ENSMUSG00000037795 | Transcript        | ENSMUST00000202817 | retained intron         | rs33590837  |
| 5:65779987-65779987 | intron_variant,non_coding_trans | MODIFIER | N4bp2         | ENSMUSG00000037795 | Transcript        | ENSMUST00000202934 | processed_transcript    | rs33590837  |
| 5:66687170-66687170 | 3_prime_UTR_variant             | MODIFIER | Uchl1         | ENSMUSG00000029223 | Transcript        | ENSMUST00000031131 | protein_coding          | rs13459521  |
| 5:66687170-66687170 | non_coding_transcript_exon_var  | MODIFIER | Uchl1         | ENSMUSG00000029223 | Transcript        | ENSMUST00000176015 | retained_intron         | rs13459521  |
| 5:66687170-66687170 | downstream gene variant         | MODIFIER | Uchl1         | ENSMUSG00000029223 | Transcript        | ENSMUST00000202339 | retained intron         | rs13459521  |
| 5:66687170-66687170 | upstream gene variant           | MODIFIER | Gm43279       | ENSMUSG00000107300 | Transcript        | ENSMUST00000202376 | TEC                     | rs13459521  |
| 5:66687170-66687170 | regulatory region variant       | MODIFIER | -             | -                  | RegulatoryFeature | ENSMUSR00000423720 | CTCF binding site       | rs13459521  |
| 5:67260253-67260253 | upstream gene variant           | MODIFIER | Tmem33        | ENSMUSG00000037720 | Transcript        | ENSMUST00000037918 | protein_coding          | rs29529097  |
| 5:67260253-67260253 | upstream_gene_variant           | MODIFIER | Tmem33        | ENSMUSG00000037720 | Transcript        | ENSMUST00000160352 | protein_coding          | rs29529097  |
| 5:67260253-67260253 | upstream_gene_variant           | MODIFIER | Tmem33        | ENSMUSG00000037720 | Transcript        | ENSMUST00000161233 | protein_coding          | rs29529097  |
| 5:67260253-67260253 | upstream_gene_variant           | MODIFIER | Tmem33        | ENSMUSG00000037720 | Transcript        | ENSMUST00000161369 | protein_coding          | rs29529097  |
| 5:67260253-67260253 | upstream gene variant           | MODIFIER | Tmem33        | ENSMUSG00000037720 | Transcript        | ENSMUST00000162074 | nonsense_mediated_decay | rs29529097  |
| 5:67260253-67260253 | upstream gene variant           | MODIFIER | Tmem33        | ENSMUSG00000037720 | Transcript        | ENSMUST00000162543 | protein_coding          | rs29529097  |
| 5:67260253-67260253 | upstream gene variant           | MODIFIER | Tmem33        | ENSMUSG00000037720 | Transcript        | ENSMUST00000163028 | retained intron         | rs29529097  |
| 5:67260253-67260253 | non_coding_transcript_exon_var  | MODIFIER | Gm42670       | ENSMUSG00000107319 | Transcript        | ENSMUST00000201816 | antisense               | rs29529097  |
| 5:67260253-67260253 | upstream_gene_variant           | MODIFIER | Tmem33        | ENSMUSG00000037720 | Transcript        | ENSMUST00000201979 | nonsense_mediated_decay | rs29529097  |
| 5:67260253-67260253 | upstream_gene_variant           | MODIFIER | Tmem33        | ENSMUSG00000037720 | Transcript        | ENSMUST00000202324 | retained_intron         | rs29529097  |
| 5:67260253-67260253 | regulatory region variant       | MODIFIER | -             | -                  | RegulatoryFeature | ENSMUSR00000210570 | promoter                | rs29529097  |
| 5:67666732-67666732 | intron variant                  | MODIFIER | Atp8a1        | ENSMUSG00000037685 | Transcript        | ENSMUST00000037380 | protein_coding          | rs48890369  |
| 5:67666732-67666732 | intron variant                  | MODIFIER | Atp8a1        | ENSMUSG00000037685 | Transcript        | ENSMUST00000072971 | protein_coding          | rs48890369  |
| 5:67666732-67666732 | intron variant                  | MODIFIER | Atp8a1        | ENSMUSG00000037685 | Transcript        | ENSMUST00000135930 | protein_coding          | rs48890369  |
| 5:67666732-67666732 | intron_variant,NMD_transcript_v | MODIFIER | Atp8a1        | ENSMUSG00000037685 | Transcript        | ENSMUST00000200955 | nonsense_mediated_decay | rs48890369  |
| 5:73310750-73310751 | intron variant                  | MODIFIER | Ociad1        | ENSMUSG00000029152 | Transcript        | ENSMUST00000031038 | protein_coding          | rs233566073 |
| 5:73310750-73310751 | intron variant                  | MODIFIER | Ociad1        | ENSMUSG00000029152 | Transcript        | ENSMUST00000071081 | protein_coding          | rs233566073 |

|                     |                                 |          |         |                     |                   |                     |                          |             |
|---------------------|---------------------------------|----------|---------|---------------------|-------------------|---------------------|--------------------------|-------------|
| 5:73310750-73310751 | downstream gene variant         | MODIFIER | Ociad1  | ENSMUSG00000029152  | Transcript        | ENSMUST00000166823  | protein coding           | rs233566073 |
| 5:73310750-73310751 | intron_variant                  | MODIFIER | Ociad1  | ENSMUSG00000029152  | Transcript        | ENSMUST00000200935  | protein_coding           | rs233566073 |
| 5:73310750-73310751 | upstream_gene_variant           | MODIFIER | Gm42733 | ENSMUSG000000107292 | Transcript        | ENSMUST000000201272 | TEC                      | rs233566073 |
| 5:73310750-73310751 | intron_variant                  | MODIFIER | Ociad1  | ENSMUSG00000029152  | Transcript        | ENSMUST00000201556  | protein_coding           | rs233566073 |
| 5:73310750-73310751 | intron variant,NMD transcript v | MODIFIER | Ociad1  | ENSMUSG00000029152  | Transcript        | ENSMUST00000201739  | nonsense mediated decay  | rs233566073 |
| 5:73310750-73310751 | downstream gene variant         | MODIFIER | Ociad1  | ENSMUSG00000029152  | Transcript        | ENSMUST00000202237  | protein coding           | rs233566073 |
| 5:73310750-73310751 | downstream gene variant         | MODIFIER | Ociad1  | ENSMUSG00000029152  | Transcript        | ENSMUST00000202250  | protein coding           | rs233566073 |
| 5:73310750-73310751 | upstream_gene_variant           | MODIFIER | Gm42732 | ENSMUSG00000107331  | Transcript        | ENSMUST00000202887  | TEC                      | rs233566073 |
| 5:73310750-73310751 | regulatory_region_variant       | MODIFIER | -       | -                   | RegulatoryFeature | ENSMUSR00000682380  | TF_binding_site          | rs233566073 |
| 5:74204987-74204987 | 3_prime_UTR_variant             | MODIFIER | Scfd2   | ENSMUSG00000062110  | Transcript        | ENSMUST00000072857  | protein_coding           | rs33759100  |
| 5:74204987-74204987 | downstream gene variant         | MODIFIER | Scfd2   | ENSMUSG00000062110  | Transcript        | ENSMUST00000113542  | protein coding           | rs33759100  |
| 5:74204987-74204987 | downstream gene variant         | MODIFIER | Scfd2   | ENSMUSG00000062110  | Transcript        | ENSMUST00000146015  | retained intron          | rs33759100  |
| 5:74204987-74204987 | downstream gene variant         | MODIFIER | Scfd2   | ENSMUSG00000062110  | Transcript        | ENSMUST00000202465  | processed transcript     | rs33759100  |
| 5:74204987-74204987 | regulatory_region_variant       | MODIFIER | -       | -                   | RegulatoryFeature | ENSMUSR00000424182  | promoter flanking region | rs33759100  |
| 5:74204989-74204989 | 3_prime_UTR_variant             | MODIFIER | Scfd2   | ENSMUSG00000062110  | Transcript        | ENSMUST00000072857  | protein_coding           | rs33662599  |
| 5:74204989-74204989 | downstream_gene_variant         | MODIFIER | Scfd2   | ENSMUSG00000062110  | Transcript        | ENSMUST00000113542  | protein_coding           | rs33662599  |
| 5:74204989-74204989 | downstream_gene_variant         | MODIFIER | Scfd2   | ENSMUSG00000062110  | Transcript        | ENSMUST00000146015  | retained_intron          | rs33662599  |
| 5:74204989-74204989 | downstream gene variant         | MODIFIER | Scfd2   | ENSMUSG00000062110  | Transcript        | ENSMUST00000202465  | processed transcript     | rs33662599  |
| 5:74204989-74204989 | regulatory_region_variant       | MODIFIER | -       | -                   | RegulatoryFeature | ENSMUSR00000424182  | promoter flanking region | rs33662599  |
| 5:74205098-74205098 | 3 prime UTR variant             | MODIFIER | Scfd2   | ENSMUSG00000062110  | Transcript        | ENSMUST00000072857  | protein coding           | rs29562162  |
| 5:74205098-74205098 | downstream_gene_variant         | MODIFIER | Scfd2   | ENSMUSG00000062110  | Transcript        | ENSMUST00000113542  | protein_coding           | rs29562162  |
| 5:74205098-74205098 | downstream_gene_variant         | MODIFIER | Scfd2   | ENSMUSG00000062110  | Transcript        | ENSMUST00000146015  | retained_intron          | rs29562162  |
| 5:74205098-74205098 | non_coding_transcript_exon_var  | MODIFIER | Scfd2   | ENSMUSG00000062110  | Transcript        | ENSMUST00000202465  | processed transcript     | rs29562162  |
| 5:74205098-74205098 | regulatory_region_variant       | MODIFIER | -       | -                   | RegulatoryFeature | ENSMUSR00000424182  | promoter flanking region | rs29562162  |
| 5:74205903-74205903 | 3 prime UTR variant             | MODIFIER | Scfd2   | ENSMUSG00000062110  | Transcript        | ENSMUST00000072857  | protein coding           | rs227051270 |
| 5:74205903-74205903 | downstream gene variant         | MODIFIER | Scfd2   | ENSMUSG00000062110  | Transcript        | ENSMUST00000113542  | protein coding           | rs227051270 |
| 5:74205903-74205903 | downstream gene variant         | MODIFIER | Scfd2   | ENSMUSG00000062110  | Transcript        | ENSMUST00000146015  | retained intron          | rs227051270 |
| 5:74205903-74205903 | intron_variant,non_coding_trans | MODIFIER | Scfd2   | ENSMUSG00000062110  | Transcript        | ENSMUST00000202465  | processed transcript     | rs227051270 |
| 5:74205903-74205903 | regulatory_region_variant       | MODIFIER | -       | -                   | RegulatoryFeature | ENSMUSR00000424182  | promoter flanking region | rs227051270 |
| 5:74441623-74441623 | intron_variant                  | MODIFIER | Scfd2   | ENSMUSG00000062110  | Transcript        | ENSMUST00000072857  | protein_coding           | rs29624941  |
| 5:74441623-74441623 | intron variant                  | MODIFIER | Scfd2   | ENSMUSG00000062110  | Transcript        | ENSMUST00000113542  | protein coding           | rs29624941  |
| 5:74451818-74451818 | intron variant                  | MODIFIER | Scfd2   | ENSMUSG00000062110  | Transcript        | ENSMUST00000072857  | protein coding           | rs33318651  |
| 5:74451818-74451818 | intron variant,NMD transcript v | MODIFIER | Scfd2   | ENSMUSG00000062110  | Transcript        | ENSMUST00000075848  | nonsense mediated decay  | rs33318651  |
| 5:74451818-74451818 | intron_variant                  | MODIFIER | Scfd2   | ENSMUSG00000062110  | Transcript        | ENSMUST00000113542  | protein_coding           | rs33318651  |
| 5:74451818-74451818 | downstream_gene_variant         | MODIFIER | Scfd2   | ENSMUSG00000062110  | Transcript        | ENSMUST00000151474  | protein_coding           | rs33318651  |
| 5:76150708-76150708 | intron_variant                  | MODIFIER | Srd5a3  | ENSMUSG00000029233  | Transcript        | ENSMUST00000031143  | protein_coding           | rs3155664   |
| 5:76150708-76150708 | intron variant                  | MODIFIER | Srd5a3  | ENSMUSG00000029233  | Transcript        | ENSMUST00000113506  | protein coding           | rs3155664   |
| 5:76150708-76150708 | intron variant                  | MODIFIER | Srd5a3  | ENSMUSG00000029233  | Transcript        | ENSMUST00000113507  | protein coding           | rs3155664   |
| 5:76150708-76150708 | upstream gene variant           | MODIFIER | Srd5a3  | ENSMUSG00000029233  | Transcript        | ENSMUST00000124217  | retained intron          | rs3155664   |
| 5:76150708-76150708 | downstream gene variant         | MODIFIER | Srd5a3  | ENSMUSG00000029233  | Transcript        | ENSMUST00000127278  | protein coding           | rs3155664   |
| 5:76150708-76150708 | non_coding_transcript_exon_var  | MODIFIER | Srd5a3  | ENSMUSG00000029233  | Transcript        | ENSMUST00000138699  | retained_intron          | rs3155664   |
| 5:76150708-76150708 | downstream_gene_variant         | MODIFIER | Srd5a3  | ENSMUSG00000029233  | Transcript        | ENSMUST00000152642  | protein_coding           | rs3155664   |
| 5:76151525-76151525 | intron_variant                  | MODIFIER | Srd5a3  | ENSMUSG00000029233  | Transcript        | ENSMUST00000031143  | protein_coding           | rs255004139 |
| 5:76151525-76151525 | intron variant                  | MODIFIER | Srd5a3  | ENSMUSG00000029233  | Transcript        | ENSMUST00000113506  | protein coding           | rs255004139 |
| 5:76151525-76151525 | intron variant                  | MODIFIER | Srd5a3  | ENSMUSG00000029233  | Transcript        | ENSMUST00000113507  | protein coding           | rs255004139 |
| 5:76151525-76151525 | upstream gene variant           | MODIFIER | Srd5a3  | ENSMUSG00000029233  | Transcript        | ENSMUST00000124217  | retained intron          | rs255004139 |
| 5:76151525-76151525 | downstream_gene_variant         | MODIFIER | Srd5a3  | ENSMUSG00000029233  | Transcript        | ENSMUST00000127278  | protein_coding           | rs255004139 |
| 5:76151525-76151525 | downstream_gene_variant         | MODIFIER | Srd5a3  | ENSMUSG00000029233  | Transcript        | ENSMUST00000138699  | retained_intron          | rs255004139 |
| 5:76151525-76151525 | downstream_gene_variant         | MODIFIER | Srd5a3  | ENSMUSG00000029233  | Transcript        | ENSMUST00000152642  | protein_coding           | rs255004139 |
| 5:76156115-76156115 | downstream gene variant         | MODIFIER | Srd5a3  | ENSMUSG00000029233  | Transcript        | ENSMUST00000031143  | protein coding           | rs3155653   |
| 5:76156115-76156115 | downstream gene variant         | MODIFIER | Srd5a3  | ENSMUSG00000029233  | Transcript        | ENSMUST00000113506  | protein coding           | rs3155653   |
| 5:76156115-76156115 | downstream gene variant         | MODIFIER | Srd5a3  | ENSMUSG00000029233  | Transcript        | ENSMUST00000113507  | protein coding           | rs3155653   |
| 5:76156115-76156115 | downstream gene variant         | MODIFIER | Srd5a3  | ENSMUSG00000029233  | Transcript        | ENSMUST00000124217  | retained intron          | rs3155653   |
| 5:76156115-76156115 | downstream_gene_variant         | MODIFIER | Srd5a3  | ENSMUSG00000029233  | Transcript        | ENSMUST00000138699  | retained_intron          | rs3155653   |
| 5:76185655-76185655 | intron_variant                  | MODIFIER | Tmem165 | ENSMUSG00000029234  | Transcript        | ENSMUST00000031144  | protein_coding           | rs3153698   |
| 5:76185655-76185655 | intron_variant,non_coding_trans | MODIFIER | Tmem165 | ENSMUSG00000029234  | Transcript        | ENSMUST00000136424  | processed transcript     | rs3153698   |
| 5:76185655-76185655 | regulatory_region_variant       | MODIFIER | -       | -                   | RegulatoryFeature | ENSMUSR00000211520  | promoter                 | rs3153698   |
| 5:76202347-76202347 | intron variant                  | MODIFIER | Tmem165 | ENSMUSG00000029234  | Transcript        | ENSMUST00000031144  | protein coding           | rs3153685   |
| 5:76202347-76202347 | intron variant                  | MODIFIER | Tmem165 | ENSMUSG00000029234  | Transcript        | ENSMUST00000130842  | protein coding           | rs3153685   |
| 5:76202347-76202347 | intron_variant,non_coding_trans | MODIFIER | Tmem165 | ENSMUSG00000029234  | Transcript        | ENSMUST00000138544  | retained_intron          | rs3153685   |
| 5:76202347-76202347 | upstream_gene_variant           | MODIFIER | Tmem165 | ENSMUSG00000029234  | Transcript        | ENSMUST00000153633  | processed transcript     | rs3153685   |
| 5:76210856-76210856 | downstream_gene_variant         | MODIFIER | Tmem165 | ENSMUSG00000029234  | Transcript        | ENSMUST00000031144  | protein_coding           | rs3155605   |
| 5:76210856-76210856 | downstream gene variant         | MODIFIER | Clock   | ENSMUSG00000029238  | Transcript        | ENSMUST00000075159  | protein coding           | rs3155605   |
| 5:76210856-76210856 | downstream gene variant         | MODIFIER | Tmem165 | ENSMUSG00000029234  | Transcript        | ENSMUST00000153633  | processed transcript     | rs3155605   |
| 5:76210856-76210856 | downstream gene variant         | MODIFIER | Clock   | ENSMUSG00000029238  | Transcript        | ENSMUST00000202122  | protein coding           | rs3155605   |
| 5:76210856-76210856 | 3 prime UTR variant             | MODIFIER | Clock   | ENSMUSG00000029238  | Transcript        | ENSMUST00000202651  | protein coding           | rs3155605   |
| 5:86093305-86093305 | intron_variant                  | MODIFIER | Stap1   | ENSMUSG00000029254  | Transcript        | ENSMUST00000031171  | protein_coding           | rs33398007  |
| 5:86093305-86093305 | intron_variant,non_coding_trans | MODIFIER | Stap1   | ENSMUSG00000029254  | Transcript        | ENSMUST00000123393  | retained_intron          | rs33398007  |
| 5:86093305-86093305 | intron_variant,non_coding_trans | MODIFIER | Stap1   | ENSMUSG00000029254  | Transcript        | ENSMUST00000138076  | retained_intron          | rs33398007  |

|                     |                                 |          |         |                    |                   |                    |                                |             |
|---------------------|---------------------------------|----------|---------|--------------------|-------------------|--------------------|--------------------------------|-------------|
| 5:86093305-86093305 | intron variant                  | MODIFIER | Stap1   | ENSMUSG00000029254 | Transcript        | ENSMUST00000198435 | protein coding                 | rs33398007  |
| 5:86109123-86109123 | downstream_gene_variant         | MODIFIER | Uba6    | ENSMUSG00000035898 | Transcript        | ENSMUST00000039373 | protein coding                 | rs31656666  |
| 5:86109123-86109123 | downstream_gene_variant         | MODIFIER | Uba6    | ENSMUSG00000035898 | Transcript        | ENSMUST00000113373 | protein coding                 | rs31656666  |
| 5:86109123-86109123 | downstream_gene_variant         | MODIFIER | Stap1   | ENSMUSG00000029254 | Transcript        | ENSMUST00000198435 | protein coding                 | rs31656666  |
| 5:89676466-89676472 | downstream gene variant         | MODIFIER | Adams3  | ENSMUSG00000043635 | Transcript        | ENSMUST00000061427 | protein coding                 | rs214336150 |
| 5:89676466-89676472 | downstream gene variant         | MODIFIER | Adams3  | ENSMUSG00000043635 | Transcript        | ENSMUST00000163159 | protein coding                 | rs214336150 |
| 5:89697618-89697618 | intron variant                  | MODIFIER | Adams3  | ENSMUSG00000043635 | Transcript        | ENSMUST00000061427 | protein coding                 | rs33254711  |
| 5:89697618-89697618 | intron_variant                  | MODIFIER | Adams3  | ENSMUSG00000043635 | Transcript        | ENSMUST00000163159 | protein coding                 | rs33254711  |
| 5:89708675-89708675 | synonymous_variant              | LOW      | Adams3  | ENSMUSG00000043635 | Transcript        | ENSMUST00000061427 | protein coding                 | rs33109821  |
| 5:89708675-89708675 | synonymous_variant              | LOW      | Adams3  | ENSMUSG00000043635 | Transcript        | ENSMUST00000163159 | protein coding                 | rs33109821  |
| 5:90216217-90216217 | intron variant                  | MODIFIER | Cox18   | ENSMUSG00000035505 | Transcript        | ENSMUST00000048363 | protein coding                 | rs31699010  |
| 5:90216217-90216217 | intron variant                  | MODIFIER | Cox18   | ENSMUSG00000035505 | Transcript        | ENSMUST00000118816 | protein coding                 | rs31699010  |
| 5:90216217-90216217 | downstream gene variant         | MODIFIER | Cox18   | ENSMUSG00000035505 | Transcript        | ENSMUST00000131068 | retained intron                | rs31699010  |
| 5:90216217-90216217 | upstream gene variant           | MODIFIER | Cox18   | ENSMUSG00000035505 | Transcript        | ENSMUST00000133905 | processed transcript           | rs31699010  |
| 5:90216217-90216217 | intron_variant,non_coding_trans | MODIFIER | Cox18   | ENSMUSG00000035505 | Transcript        | ENSMUST00000144898 | retained_intron                | rs31699010  |
| 5:90216217-90216217 | downstream_gene_variant         | MODIFIER | Cox18   | ENSMUSG00000035505 | Transcript        | ENSMUST00000148480 | nonsense_mediated_decay        | rs31699010  |
| 5:90216217-90216217 | upstream_gene_variant           | MODIFIER | Cox18   | ENSMUSG00000035505 | Transcript        | ENSMUST00000200475 | retained_intron                | rs31699010  |
| 5:90217273-90217273 | intron variant                  | MODIFIER | Cox18   | ENSMUSG00000035505 | Transcript        | ENSMUST00000048363 | protein coding                 | rs31699985  |
| 5:90217273-90217273 | intron variant                  | MODIFIER | Cox18   | ENSMUSG00000035505 | Transcript        | ENSMUST00000118816 | protein coding                 | rs31699985  |
| 5:90217273-90217273 | downstream gene variant         | MODIFIER | Cox18   | ENSMUSG00000035505 | Transcript        | ENSMUST00000131068 | retained intron                | rs31699985  |
| 5:90217273-90217273 | upstream_gene_variant           | MODIFIER | Cox18   | ENSMUSG00000035505 | Transcript        | ENSMUST00000133905 | processed_transcript           | rs31699985  |
| 5:90217273-90217273 | intron_variant,non_coding_trans | MODIFIER | Cox18   | ENSMUSG00000035505 | Transcript        | ENSMUST00000144898 | retained_intron                | rs31699985  |
| 5:90217273-90217273 | downstream_gene_variant         | MODIFIER | Cox18   | ENSMUSG00000035505 | Transcript        | ENSMUST00000148480 | nonsense_mediated_decay        | rs31699985  |
| 5:90217273-90217273 | upstream gene variant           | MODIFIER | Cox18   | ENSMUSG00000035505 | Transcript        | ENSMUST00000200475 | retained intron                | rs31699985  |
| 5:90229878-90229878 | intron variant                  | MODIFIER | Ankrd17 | ENSMUSG00000055204 | Transcript        | ENSMUST00000014421 | protein coding                 | rs50590842  |
| 5:90229878-90229878 | intron variant                  | MODIFIER | Ankrd17 | ENSMUSG00000055204 | Transcript        | ENSMUST00000081914 | protein coding                 | rs50590842  |
| 5:90229878-90229878 | intron variant                  | MODIFIER | Ankrd17 | ENSMUSG00000055204 | Transcript        | ENSMUST00000168058 | protein coding                 | rs50590842  |
| 5:90229878-90229878 | intron_variant,non_coding_trans | MODIFIER | Ankrd17 | ENSMUSG00000055204 | Transcript        | ENSMUST00000196919 | retained_intron                | rs50590842  |
| 5:90229878-90229878 | intron_variant                  | MODIFIER | Ankrd17 | ENSMUSG00000055204 | Transcript        | ENSMUST00000197021 | protein coding                 | rs50590842  |
| 5:90229878-90229878 | regulatory_region_variant       | MODIFIER | -       | -                  | RegulatoryFeature | ENSMUSR00000212408 | open_chromatin_region          | rs50590842  |
| 5:90239675-90239675 | intron variant                  | MODIFIER | Ankrd17 | ENSMUSG00000055204 | Transcript        | ENSMUST00000014421 | protein coding                 | rs45775342  |
| 5:90239675-90239675 | intron variant                  | MODIFIER | Ankrd17 | ENSMUSG00000055204 | Transcript        | ENSMUST00000081914 | protein coding                 | rs45775342  |
| 5:90239675-90239675 | intron variant                  | MODIFIER | Ankrd17 | ENSMUSG00000055204 | Transcript        | ENSMUST00000168058 | protein coding                 | rs45775342  |
| 5:90239675-90239675 | intron_variant                  | MODIFIER | Ankrd17 | ENSMUSG00000055204 | Transcript        | ENSMUST00000197021 | protein coding                 | rs45775342  |
| 5:90239675-90239675 | non_coding_transcript_exon_var  | MODIFIER | Ankrd17 | ENSMUSG00000055204 | Transcript        | ENSMUST00000197327 | retained_intron                | rs45775342  |
| 5:90608943-90608943 | synonymous_variant              | LOW      | Rassf6  | ENSMUSG00000029370 | Transcript        | ENSMUST00000031317 | protein coding                 | -           |
| 5:90608943-90608943 | synonymous variant              | LOW      | Rassf6  | ENSMUSG00000029370 | Transcript        | ENSMUST00000202704 | protein coding                 | -           |
| 5:90608943-90608943 | synonymous variant              | LOW      | Rassf6  | ENSMUSG00000029370 | Transcript        | ENSMUST00000202784 | protein coding                 | -           |
| 5:90608943-90608943 | 3 prime UTR variant,NMD trar    | MODIFIER | Rassf6  | ENSMUSG00000029370 | Transcript        | ENSMUST00000202807 | nonsense mediated decay        | -           |
| 5:90608943-90608943 | regulatory region variant       | MODIFIER | -       | -                  | RegulatoryFeature | ENSMUSR00000683906 | promoter flanking region       | -           |
| 5:90608945-90608945 | missense_variant                | MODERATE | Rassf6  | ENSMUSG00000029370 | Transcript        | ENSMUST00000031317 | protein coding                 | -           |
| 5:90608945-90608945 | missense_variant                | MODERATE | Rassf6  | ENSMUSG00000029370 | Transcript        | ENSMUST00000202704 | protein coding                 | -           |
| 5:90608945-90608945 | missense_variant                | MODERATE | Rassf6  | ENSMUSG00000029370 | Transcript        | ENSMUST00000202784 | protein coding                 | -           |
| 5:90608945-90608945 | 3 prime UTR variant,NMD trar    | MODIFIER | Rassf6  | ENSMUSG00000029370 | Transcript        | ENSMUST00000202807 | nonsense mediated decay        | -           |
| 5:90608945-90608945 | regulatory region variant       | MODIFIER | -       | -                  | RegulatoryFeature | ENSMUSR00000683906 | promoter flanking region       | -           |
| 5:90640640-90640640 | upstream gene variant           | MODIFIER | Rassf6  | ENSMUSG00000029370 | Transcript        | ENSMUST00000031317 | protein coding                 | rs47653411  |
| 5:90640640-90640640 | upstream_gene_variant           | MODIFIER | Rassf6  | ENSMUSG00000029370 | Transcript        | ENSMUST00000201121 | nonsense_mediated_decay        | rs47653411  |
| 5:90640640-90640640 | upstream_gene_variant           | MODIFIER | Rassf6  | ENSMUSG00000029370 | Transcript        | ENSMUST00000201370 | protein coding                 | rs47653411  |
| 5:90640640-90640640 | non_coding_transcript_exon_var  | MODIFIER | Rassf6  | ENSMUSG00000029370 | Transcript        | ENSMUST00000201436 | processed_transcript           | rs47653411  |
| 5:90640640-90640640 | 5 prime UTR variant             | MODIFIER | Rassf6  | ENSMUSG00000029370 | Transcript        | ENSMUST00000202704 | protein coding                 | rs47653411  |
| 5:90640640-90640640 | upstream gene variant           | MODIFIER | Rassf6  | ENSMUSG00000029370 | Transcript        | ENSMUST00000202784 | protein coding                 | rs47653411  |
| 5:90640640-90640640 | regulatory region variant       | MODIFIER | -       | -                  | RegulatoryFeature | ENSMUSR00000212483 | promoter                       | rs47653411  |
| 5:91947161-91947161 | downstream gene variant         | MODIFIER | Rchy1   | ENSMUSG00000029397 | Transcript        | ENSMUST00000031345 | protein coding                 | rs230764789 |
| 5:91947161-91947161 | downstream_gene_variant         | MODIFIER | Rchy1   | ENSMUSG00000029397 | Transcript        | ENSMUST00000138351 | retained_intron                | rs230764789 |
| 5:91947161-91947161 | downstream_gene_variant         | MODIFIER | Rchy1   | ENSMUSG00000029397 | Transcript        | ENSMUST00000140670 | processed_transcript           | rs230764789 |
| 5:91947161-91947161 | downstream_gene_variant         | MODIFIER | Rchy1   | ENSMUSG00000029397 | Transcript        | ENSMUST00000169948 | protein coding                 | rs230764789 |
| 5:91952694-91952694 | intron variant                  | MODIFIER | Rchy1   | ENSMUSG00000029397 | Transcript        | ENSMUST00000031345 | protein coding                 | rs29545223  |
| 5:91952694-91952694 | intron_variant,non_coding_trans | MODIFIER | Rchy1   | ENSMUSG00000029397 | Transcript        | ENSMUST00000138351 | retained intron                | rs29545223  |
| 5:91952694-91952694 | intron variant,non_coding_trans | MODIFIER | Rchy1   | ENSMUSG00000029397 | Transcript        | ENSMUST00000140670 | processed transcript           | rs29545223  |
| 5:91952694-91952694 | intron_variant                  | MODIFIER | Rchy1   | ENSMUSG00000029397 | Transcript        | ENSMUST00000169948 | protein coding                 | rs29545223  |
| 5:91972566-91972566 | downstream_gene_variant         | MODIFIER | Thap6   | ENSMUSG00000102644 | Transcript        | ENSMUST00000191860 | transcribed_unitary_pseudogene | rs33043111  |
| 5:91972566-91972566 | downstream_gene_variant         | MODIFIER | Thap6   | ENSMUSG00000102644 | Transcript        | ENSMUST00000192174 | processed_transcript           | rs33043111  |
| 5:91972566-91972566 | downstream gene variant         | MODIFIER | Thap6   | ENSMUSG00000102644 | Transcript        | ENSMUST00000192939 | processed transcript           | rs33043111  |
| 5:92006271-92006271 | 3 prime UTR variant             | MODIFIER | Cdkl2   | ENSMUSG00000029403 | Transcript        | ENSMUST00000069937 | protein coding                 | rs29563926  |
| 5:92006271-92006271 | 3 prime UTR variant             | MODIFIER | Cdkl2   | ENSMUSG00000029403 | Transcript        | ENSMUST00000086978 | protein coding                 | rs29563926  |
| 5:92006271-92006271 | downstream gene variant         | MODIFIER | Cdkl2   | ENSMUSG00000029403 | Transcript        | ENSMUST00000113140 | protein coding                 | rs29563926  |
| 5:92006271-92006271 | downstream_gene_variant         | MODIFIER | Cdkl2   | ENSMUSG00000029403 | Transcript        | ENSMUST00000113143 | protein coding                 | rs29563926  |
| 5:92006271-92006271 | downstream_gene_variant         | MODIFIER | Cdkl2   | ENSMUSG00000029403 | Transcript        | ENSMUST00000136037 | retained_intron                | rs29563926  |
| 5:92006881-92006881 | 3_prime_UTR_variant             | MODIFIER | Cdkl2   | ENSMUSG00000029403 | Transcript        | ENSMUST00000069937 | protein coding                 | rs31762827  |

|                       |                                 |          |         |                    |                   |                     |                          |             |
|-----------------------|---------------------------------|----------|---------|--------------------|-------------------|---------------------|--------------------------|-------------|
| 5:92006881-92006881   | 3 prime UTR variant             | MODIFIER | Cdkl2   | ENSMUSG00000029403 | Transcript        | ENSMUST00000086978  | protein coding           | rs31762827  |
| 5:92006881-92006881   | downstream_gene_variant         | MODIFIER | Cdkl2   | ENSMUSG00000029403 | Transcript        | ENSMUST00000113140  | protein_coding           | rs31762827  |
| 5:92006881-92006881   | downstream_gene_variant         | MODIFIER | Cdkl2   | ENSMUSG00000029403 | Transcript        | ENSMUST00000113143  | protein_coding           | rs31762827  |
| 5:92006881-92006881   | downstream_gene_variant         | MODIFIER | Cdkl2   | ENSMUSG00000029403 | Transcript        | ENSMUST00000136037  | retained_intron          | rs31762827  |
| 5:92245584-92245584   | intron variant                  | MODIFIER | Ppef2   | ENSMUSG00000029410 | Transcript        | ENSMUST00000031359  | protein coding           | rs29779648  |
| 5:92245584-92245584   | intron variant                  | MODIFIER | Ppef2   | ENSMUSG00000029410 | Transcript        | ENSMUST000000201130 | protein coding           | rs29779648  |
| 5:92245584-92245584   | regulatory region variant       | MODIFIER | -       | -                  | RegulatoryFeature | ENSMUSR00000684142  | TF binding site          | rs29779648  |
| 5:92258968-92258968   | intron_variant                  | MODIFIER | Naaa    | ENSMUSG00000029413 | Transcript        | ENSMUST00000113102  | protein_coding           | rs29677929  |
| 5:92258968-92258968   | intron_variant                  | MODIFIER | Naaa    | ENSMUSG00000029413 | Transcript        | ENSMUST00000159345  | protein_coding           | rs29677929  |
| 5:92258968-92258968   | intron_variant,non_coding_trans | MODIFIER | Naaa    | ENSMUSG00000029413 | Transcript        | ENSMUST00000159732  | retained_intron          | rs29677929  |
| 5:92258968-92258968   | downstream gene variant         | MODIFIER | Naaa    | ENSMUSG00000029413 | Transcript        | ENSMUST00000175656  | protein coding           | rs29677929  |
| 5:92258968-92258968   | upstream gene variant           | MODIFIER | Ppef2   | ENSMUSG00000029410 | Transcript        | ENSMUST00000201130  | protein coding           | rs29677929  |
| 5:92264236-92264236   | intron variant                  | MODIFIER | Naaa    | ENSMUSG00000029413 | Transcript        | ENSMUST00000113102  | protein coding           | rs31777069  |
| 5:92264236-92264236   | intron variant                  | MODIFIER | Naaa    | ENSMUSG00000029413 | Transcript        | ENSMUST00000159345  | protein coding           | rs31777069  |
| 5:92264236-92264236   | upstream_gene_variant           | MODIFIER | Naaa    | ENSMUSG00000029413 | Transcript        | ENSMUST00000159732  | retained_intron          | rs31777069  |
| 5:92264236-92264236   | intron_variant                  | MODIFIER | Naaa    | ENSMUSG00000029413 | Transcript        | ENSMUST00000175656  | protein_coding           | rs31777069  |
| 5:92264236-92264236   | regulatory_region_variant       | MODIFIER | -       | -                  | RegulatoryFeature | ENSMUSR00000425112  | promoter_flanking_region | rs31777069  |
| 5:92291342-92291342   | intron variant                  | MODIFIER | Sdad1   | ENSMUSG00000029415 | Transcript        | ENSMUST00000031364  | protein coding           | rs33500095  |
| 5:92291342-92291342   | downstream gene variant         | MODIFIER | Sdad1   | ENSMUSG00000029415 | Transcript        | ENSMUST00000201084  | retained_intron          | rs33500095  |
| 5:92291342-92291342   | intron variant                  | MODIFIER | Sdad1   | ENSMUSG00000029415 | Transcript        | ENSMUST00000201143  | protein coding           | rs33500095  |
| 5:92291342-92291342   | intron_variant,non_coding_trans | MODIFIER | Gm43599 | ENSMUSG00000106698 | Transcript        | ENSMUST00000202680  | antisense                | rs33500095  |
| 5:92291342-92291342   | intron_variant,non_coding_trans | MODIFIER | Sdad1   | ENSMUSG00000029415 | Transcript        | ENSMUST00000202903  | retained_intron          | rs33500095  |
| 5:92295842-92295842   | intron_variant                  | MODIFIER | Sdad1   | ENSMUSG00000029415 | Transcript        | ENSMUST00000031364  | protein_coding           | rs33590216  |
| 5:92295842-92295842   | intron variant,non coding trans | MODIFIER | Sdad1   | ENSMUSG00000029415 | Transcript        | ENSMUST00000201084  | retained_intron          | rs33590216  |
| 5:92295842-92295842   | intron variant                  | MODIFIER | Sdad1   | ENSMUSG00000029415 | Transcript        | ENSMUST00000201143  | protein coding           | rs33590216  |
| 5:92295842-92295842   | intron variant,non coding trans | MODIFIER | Gm43599 | ENSMUSG00000106698 | Transcript        | ENSMUST00000202680  | antisense                | rs33590216  |
| 5:92295842-92295842   | intron variant,non coding trans | MODIFIER | Sdad1   | ENSMUSG00000029415 | Transcript        | ENSMUST00000202903  | retained_intron          | rs33590216  |
| 5:92300340-92300340   | intron_variant                  | MODIFIER | Sdad1   | ENSMUSG00000029415 | Transcript        | ENSMUST00000031364  | protein_coding           | rs31777314  |
| 5:92300340-92300340   | upstream_gene_variant           | MODIFIER | Gm23031 | ENSMUSG00000088623 | Transcript        | ENSMUST00000157998  | snRNA                    | rs31777314  |
| 5:92300340-92300340   | upstream_gene_variant           | MODIFIER | Sdad1   | ENSMUSG00000029415 | Transcript        | ENSMUST00000201084  | retained_intron          | rs31777314  |
| 5:92300340-92300340   | intron variant                  | MODIFIER | Sdad1   | ENSMUSG00000029415 | Transcript        | ENSMUST00000201143  | protein coding           | rs31777314  |
| 5:92300340-92300340   | downstream gene variant         | MODIFIER | Sdad1   | ENSMUSG00000029415 | Transcript        | ENSMUST00000201532  | retained_intron          | rs31777314  |
| 5:92300340-92300340   | downstream gene variant         | MODIFIER | Sdad1   | ENSMUSG00000029415 | Transcript        | ENSMUST00000202604  | retained_intron          | rs31777314  |
| 5:92300340-92300340   | intron_variant,non_coding_trans | MODIFIER | Gm43599 | ENSMUSG00000106698 | Transcript        | ENSMUST00000202680  | antisense                | rs31777314  |
| 5:92300340-92300340   | upstream_gene_variant           | MODIFIER | Sdad1   | ENSMUSG00000029415 | Transcript        | ENSMUST00000202903  | retained_intron          | rs31777314  |
| 5:92605942-92605942   | 3_prime_UTR_variant             | MODIFIER | Stbd1   | ENSMUSG00000047963 | Transcript        | ENSMUST00000050952  | protein_coding           | rs33292414  |
| 5:92605942-92605942   | downstream gene variant         | MODIFIER | Ccdc158 | ENSMUSG00000050050 | Transcript        | ENSMUST00000060930  | protein coding           | rs33292414  |
| 5:92605942-92605942   | downstream gene variant         | MODIFIER | Ccdc158 | ENSMUSG00000050050 | Transcript        | ENSMUST00000136004  | retained_intron          | rs33292414  |
| 5:92605942-92605942   | downstream gene variant         | MODIFIER | Stbd1   | ENSMUSG00000047963 | Transcript        | ENSMUST00000200941  | protein coding           | rs33292414  |
| 5:92605942-92605942   | 3 prime UTR variant,NMD trans   | MODIFIER | Stbd1   | ENSMUSG00000047963 | Transcript        | ENSMUST00000202332  | nonsense mediated decay  | rs33292414  |
| 5:93454688-93454688   | intergenic_variant              | MODIFIER | -       | -                  | -                 | -                   | -                        | rs33148943  |
| 5:93454694-93454694   | intergenic_variant              | MODIFIER | -       | -                  | -                 | -                   | -                        | rs232102783 |
| 5:93455633-93455633   | intergenic_variant              | MODIFIER | -       | -                  | -                 | -                   | -                        | rs238535280 |
| 5:95512859-95512859   | upstream gene variant           | MODIFIER | Gm3286  | ENSMUSG00000079423 | Transcript        | ENSMUST00000200932  | protein coding           | rs587503537 |
| 5:95512859-95512859   | intron variant                  | MODIFIER | Gm3286  | ENSMUSG00000079423 | Transcript        | ENSMUST00000201629  | protein coding           | rs587503537 |
| 5:95512860-95512860   | upstream gene variant           | MODIFIER | Gm3286  | ENSMUSG00000079423 | Transcript        | ENSMUST00000200932  | protein coding           | rs580584335 |
| 5:95512860-95512860   | intron_variant                  | MODIFIER | Gm3286  | ENSMUSG00000079423 | Transcript        | ENSMUST00000201629  | protein_coding           | rs580584335 |
| 5:96936580-96936580   | upstream_gene_variant           | MODIFIER | Gm43148 | ENSMUSG00000105377 | Transcript        | ENSMUST00000198237  | TEC                      | rs52285004  |
| 5:96936580-96936580   | upstream_gene_variant           | MODIFIER | Gm43144 | ENSMUSG00000105257 | Transcript        | ENSMUST00000198256  | TEC                      | rs52285004  |
| 5:96936580-96936580   | downstream gene variant         | MODIFIER | Gm8013  | ENSMUSG00000106357 | Transcript        | ENSMUST00000200139  | lincRNA                  | rs52285004  |
| 5:97083040-97083040   | intron variant                  | MODIFIER | Bmp2k   | ENSMUSG00000034663 | Transcript        | ENSMUST00000035635  | protein coding           | rs33075055  |
| 5:97083040-97083040   | intron variant                  | MODIFIER | Paqr3   | ENSMUSG00000055725 | Transcript        | ENSMUST00000069453  | protein coding           | rs33075055  |
| 5:97083040-97083040   | downstream gene variant         | MODIFIER | Paqr3   | ENSMUSG00000055725 | Transcript        | ENSMUST00000112969  | protein coding           | rs33075055  |
| 6:120905615-120905615 | intron_variant                  | MODIFIER | Bid     | ENSMUSG00000004446 | Transcript        | ENSMUST00000004560  | protein_coding           | rs47662882  |
| 6:120905615-120905615 | downstream_gene_variant         | MODIFIER | Bid     | ENSMUSG00000004446 | Transcript        | ENSMUST00000125915  | processed_transcript     | rs47662882  |
| 6:120905615-120905615 | intron_variant                  | MODIFIER | Bid     | ENSMUSG00000004446 | Transcript        | ENSMUST00000145948  | protein_coding           | rs47662882  |
| 6:120905615-120905615 | intron variant,NMD transcript v | MODIFIER | Bid     | ENSMUSG00000004446 | Transcript        | ENSMUST00000160684  | nonsense mediated decay  | rs47662882  |
| 6:120905615-120905615 | upstream gene variant           | MODIFIER | Gm17812 | ENSMUSG00000108125 | Transcript        | ENSMUST00000204935  | processed_pseudogene     | rs47662882  |
| 6:128406115-128406115 | downstream gene variant         | MODIFIER | Itfg2   | ENSMUSG00000001518 | Transcript        | ENSMUST00000001559  | protein coding           | rs29825836  |
| 6:128406115-128406115 | intron_variant                  | MODIFIER | Nrip2   | ENSMUSG00000001520 | Transcript        | ENSMUST00000001561  | protein_coding           | rs29825836  |
| 6:128406115-128406115 | intron_variant                  | MODIFIER | Nrip2   | ENSMUSG00000001520 | Transcript        | ENSMUST00000120405  | protein_coding           | rs29825836  |
| 6:128406115-128406115 | intron_variant                  | MODIFIER | Nrip2   | ENSMUSG00000001520 | Transcript        | ENSMUST00000123867  | protein_coding           | rs29825836  |
| 6:128406115-128406115 | non coding transcript exon var  | MODIFIER | Nrip2   | ENSMUSG00000001520 | Transcript        | ENSMUST00000136631  | retained_intron          | rs29825836  |
| 6:128406115-128406115 | downstream gene variant         | MODIFIER | Itfg2   | ENSMUSG00000001518 | Transcript        | ENSMUST00000142615  | protein coding           | rs29825836  |
| 6:128406115-128406115 | intron variant,NMD transcript v | MODIFIER | Nrip2   | ENSMUSG00000001520 | Transcript        | ENSMUST00000147155  | nonsense mediated decay  | rs29825836  |
| 6:128406115-128406115 | downstream gene variant         | MODIFIER | Itfg2   | ENSMUSG00000001518 | Transcript        | ENSMUST00000203374  | protein coding           | rs29825836  |
| 6:128406115-128406115 | downstream_gene_variant         | MODIFIER | Itfg2   | ENSMUSG00000001518 | Transcript        | ENSMUST00000203984  | protein_coding           | rs29825836  |
| 6:128406115-128406115 | intron_variant                  | MODIFIER | Gm44596 | ENSMUSG00000108011 | Transcript        | ENSMUST00000204223  | protein_coding           | rs29825836  |
| 6:128406115-128406115 | downstream_gene_variant         | MODIFIER | Itfg2   | ENSMUSG00000001518 | Transcript        | ENSMUST00000204362  | retained_intron          | rs29825836  |

|                       |                                 |          |          |                     |                   |                    |                               |              |
|-----------------------|---------------------------------|----------|----------|---------------------|-------------------|--------------------|-------------------------------|--------------|
| 6:128406115-128406115 | intron variant                  | MODIFIER | Nrip2    | ENSMUSG00000001520  | Transcript        | ENSMUST00000204836 | non stop decay                | rs29825836   |
| 6:128407798-128407798 | downstream_gene_variant         | MODIFIER | Itfg2    | ENSMUSG00000001518  | Transcript        | ENSMUST0000001559  | protein_coding                | rs226579891  |
| 6:128407798-128407798 | intron_variant                  | MODIFIER | Nrip2    | ENSMUSG00000001520  | Transcript        | ENSMUST00000001561 | protein_coding                | rs226579891  |
| 6:128407798-128407798 | intron variant                  | MODIFIER | Nrip2    | ENSMUSG00000001520  | Transcript        | ENSMUST00000120405 | protein_coding                | rs226579891  |
| 6:128407798-128407798 | intron variant                  | MODIFIER | Nrip2    | ENSMUSG00000001520  | Transcript        | ENSMUST00000123867 | protein_coding                | rs226579891  |
| 6:128407798-128407798 | non coding transcript exon var  | MODIFIER | Nrip2    | ENSMUSG00000001520  | Transcript        | ENSMUST00000136631 | retained intron               | rs226579891  |
| 6:128407798-128407798 | downstream gene variant         | MODIFIER | Itfg2    | ENSMUSG00000001518  | Transcript        | ENSMUST00000142615 | protein_coding                | rs226579891  |
| 6:128407798-128407798 | intron_variant,NMD_transcript_v | MODIFIER | Nrip2    | ENSMUSG00000001520  | Transcript        | ENSMUST00000147155 | nonsense_mediated_decay       | rs226579891  |
| 6:128407798-128407798 | downstream_gene_variant         | MODIFIER | Itfg2    | ENSMUSG00000001518  | Transcript        | ENSMUST00000203195 | retained_intron               | rs226579891  |
| 6:128407798-128407798 | downstream_gene_variant         | MODIFIER | Itfg2    | ENSMUSG00000001518  | Transcript        | ENSMUST00000203374 | protein_coding                | rs226579891  |
| 6:128407798-128407798 | downstream gene variant         | MODIFIER | Itfg2    | ENSMUSG00000001518  | Transcript        | ENSMUST00000203984 | protein_coding                | rs226579891  |
| 6:128407798-128407798 | downstream gene variant         | MODIFIER | Gm44596  | ENSMUSG00000108011  | Transcript        | ENSMUST00000204223 | protein_coding                | rs226579891  |
| 6:128407798-128407798 | downstream gene variant         | MODIFIER | Itfg2    | ENSMUSG00000001518  | Transcript        | ENSMUST00000204362 | retained intron               | rs226579891  |
| 6:128407798-128407798 | intron variant                  | MODIFIER | Nrip2    | ENSMUSG00000001520  | Transcript        | ENSMUST00000204836 | non stop decay                | rs226579891  |
| 6:129007865-129007865 | splice_acceptor_variant,non_coc | HIGH     | BC064078 | ENSMUSG00000087150  | Transcript        | ENSMUST00000122939 | transcribed_unprocessed_pseud | rs50369298   |
| 6:129007865-129007865 | non coding transcript exon var  | MODIFIER | BC064078 | ENSMUSG00000087150  | Transcript        | ENSMUST00000131176 | processed_transcript          | rs50369298   |
| 6:129056293-129056293 | intron variant                  | MODIFIER | Klrb1f   | ENSMUSG000000030154 | Transcript        | ENSMUST00000032257 | protein_coding                | rs30747537   |
| 6:129056293-129056293 | intron variant,NMD transcript v | MODIFIER | Klrb1f   | ENSMUSG000000030154 | Transcript        | ENSMUST00000203059 | nonsense mediated decay       | rs30747537   |
| 6:129056293-129056293 | downstream gene variant         | MODIFIER | Klrb1f   | ENSMUSG000000030154 | Transcript        | ENSMUST00000204320 | protein_coding                | rs30747537   |
| 6:129056293-129056293 | downstream gene variant         | MODIFIER | Klrb1f   | ENSMUSG000000030154 | Transcript        | ENSMUST00000204413 | retained intron               | rs30747537   |
| 6:129056293-129056293 | intron_variant,NMD_transcript_v | MODIFIER | Klrb1f   | ENSMUSG000000030154 | Transcript        | ENSMUST00000204508 | nonsense_mediated_decay       | rs30747537   |
| 6:129056293-129056293 | downstream_gene_variant         | MODIFIER | Klrb1f   | ENSMUSG000000030154 | Transcript        | ENSMUST00000204784 | processed_transcript          | rs30747537   |
| 6:129057550-129057550 | downstream_gene_variant         | MODIFIER | Klrb1f   | ENSMUSG000000030154 | Transcript        | ENSMUST0000032257  | protein_coding                | rs37293589   |
| 6:129057550-129057550 | downstream gene variant         | MODIFIER | Klrb1f   | ENSMUSG000000030154 | Transcript        | ENSMUST00000203059 | nonsense mediated decay       | rs37293589   |
| 6:129057550-129057550 | downstream gene variant         | MODIFIER | Klrb1f   | ENSMUSG000000030154 | Transcript        | ENSMUST00000204362 | protein_coding                | rs37293589   |
| 6:129057550-129057550 | downstream gene variant         | MODIFIER | Klrb1f   | ENSMUSG000000030154 | Transcript        | ENSMUST00000204413 | retained intron               | rs37293589   |
| 6:129057550-129057550 | downstream gene variant         | MODIFIER | Klrb1f   | ENSMUSG000000030154 | Transcript        | ENSMUST00000204508 | nonsense mediated decay       | rs37293589   |
| 6:129057550-129057550 | downstream_gene_variant         | MODIFIER | Klrb1f   | ENSMUSG000000030154 | Transcript        | ENSMUST00000204784 | processed_transcript          | rs37293589   |
| 6:129063538-129063538 | intergenic_variant              | MODIFIER | -        | -                   | -                 | -                  | -                             | rs1132095552 |
| 6:129649575-129649575 | 3_prime_UTR_variant             | MODIFIER | Klrc2    | ENSMUSG00000052736  | Transcript        | ENSMUST00000071920 | protein_coding                | rs387543454  |
| 6:129649575-129649575 | 3 prime UTR variant             | MODIFIER | Klrc2    | ENSMUSG00000052736  | Transcript        | ENSMUST00000112057 | protein_coding                | rs387543454  |
| 6:129649575-129649575 | 3 prime UTR variant             | MODIFIER | Klrc2    | ENSMUSG00000052736  | Transcript        | ENSMUST00000145984 | protein_coding                | rs387543454  |
| 6:129874907-129874907 | start lost                      | HIGH     | Klra17   | ENSMUSG00000014543  | Transcript        | ENSMUST00000014687 | protein_coding                | rs1133423676 |
| 6:129874907-129874907 | start_lost                      | HIGH     | Klra17   | ENSMUSG00000014543  | Transcript        | ENSMUST00000122219 | protein_coding                | rs1133423676 |
| 6:129874909-129874909 | 5_prime_UTR_variant             | MODIFIER | Klra17   | ENSMUSG00000014543  | Transcript        | ENSMUST00000014687 | protein_coding                | rs243351661  |
| 6:129874909-129874909 | 5_prime_UTR_variant             | MODIFIER | Klra17   | ENSMUSG00000014543  | Transcript        | ENSMUST00000122219 | protein_coding                | rs243351661  |
| 6:129972403-129972403 | non coding transcript exon var  | MODIFIER | Gm15854  | ENSMUSG00000083120  | Transcript        | ENSMUST00000118879 | unprocessed pseudogene        | rs30944791   |
| 6:130377839-130377839 | missense variant                | MODERATE | Klra1    | ENSMUSG00000079853  | Transcript        | ENSMUST00000032288 | protein_coding                | rs1132962812 |
| 6:130377839-130377839 | upstream gene variant           | MODIFIER | Klra1    | ENSMUSG00000079853  | Transcript        | ENSMUST00000127570 | retained intron               | rs1132962812 |
| 6:134933456-134933456 | intron variant,non coding trans | MODIFIER | Lockd    | ENSMUSG00000098318  | Transcript        | ENSMUST00000183867 | lincRNA                       | rs47535441   |
| 6:134933456-134933456 | intron_variant,non_coding_trans | MODIFIER | Lockd    | ENSMUSG00000098318  | Transcript        | ENSMUST00000183905 | lincRNA                       | rs47535441   |
| 6:134933456-134933456 | intron_variant,non_coding_trans | MODIFIER | Lockd    | ENSMUSG00000098318  | Transcript        | ENSMUST00000184504 | lincRNA                       | rs47535441   |
| 6:134933456-134933456 | intron_variant,non_coding_trans | MODIFIER | Lockd    | ENSMUSG00000098318  | Transcript        | ENSMUST00000184991 | lincRNA                       | rs47535441   |
| 6:134933456-134933456 | intron variant,non coding trans | MODIFIER | Lockd    | ENSMUSG00000098318  | Transcript        | ENSMUST00000185152 | lincRNA                       | rs47535441   |
| 6:134933456-134933456 | upstream gene variant           | MODIFIER | Gm44238  | ENSMUSG00000107730  | Transcript        | ENSMUST00000203300 | lincRNA                       | rs47535441   |
| 6:134984732-134984732 | 3 prime UTR variant             | MODIFIER | Apold1   | ENSMUSG00000090698  | Transcript        | ENSMUST00000167323 | protein_coding                | rs30745732   |
| 6:134984732-134984732 | regulatory_region_variant       | MODIFIER | -        | -                   | RegulatoryFeature | ENSMUSR00000236726 | promoter                      | rs30745732   |
| 6:135021780-135021780 | intron_variant                  | MODIFIER | Ddx47    | ENSMUSG00000030204  | Transcript        | ENSMUST00000032326 | protein_coding                | rs37083956   |
| 6:135021780-135021780 | downstream_gene_variant         | MODIFIER | Ddx47    | ENSMUSG00000030204  | Transcript        | ENSMUST00000123022 | processed_transcript          | rs37083956   |
| 6:135021780-135021780 | downstream gene variant         | MODIFIER | Ddx47    | ENSMUSG00000030204  | Transcript        | ENSMUST00000130851 | protein_coding                | rs37083956   |
| 6:135021780-135021780 | downstream gene variant         | MODIFIER | Ddx47    | ENSMUSG00000030204  | Transcript        | ENSMUST00000134549 | retained intron               | rs37083956   |
| 6:135021780-135021780 | downstream gene variant         | MODIFIER | Ddx47    | ENSMUSG00000030204  | Transcript        | ENSMUST00000154558 | protein_coding                | rs37083956   |
| 6:135021780-135021780 | 3 prime UTR variant             | MODIFIER | Ddx47    | ENSMUSG00000030204  | Transcript        | ENSMUST00000155022 | protein_coding                | rs37083956   |
| 6:135021780-135021780 | intron_variant,non_coding_trans | MODIFIER | Ddx47    | ENSMUSG00000030204  | Transcript        | ENSMUST00000155277 | retained_intron               | rs37083956   |
| 6:135021780-135021780 | downstream_gene_variant         | MODIFIER | Ddx47    | ENSMUSG00000030204  | Transcript        | ENSMUST00000204646 | protein_coding                | rs37083956   |
| 6:135021780-135021780 | downstream_gene_variant         | MODIFIER | Ddx47    | ENSMUSG00000030204  | Transcript        | ENSMUST00000205055 | protein_coding                | rs37083956   |
| 6:135021780-135021780 | downstream gene variant         | MODIFIER | Ddx47    | ENSMUSG00000030204  | Transcript        | ENSMUST00000205244 | protein_coding                | rs37083956   |
| 6:136815967-136815967 | intron variant                  | MODIFIER | Wbp11    | ENSMUSG00000030216  | Transcript        | ENSMUST00000116514 | protein_coding                | rs36710304   |
| 6:136815967-136815967 | downstream gene variant         | MODIFIER | Wbp11    | ENSMUSG00000030216  | Transcript        | ENSMUST00000151333 | retained intron               | rs36710304   |
| 6:136815967-136815967 | downstream_gene_variant         | MODIFIER | Wbp11    | ENSMUSG00000030216  | Transcript        | ENSMUST00000204129 | protein_coding                | rs36710304   |
| 6:136815967-136815967 | downstream_gene_variant         | MODIFIER | Wbp11    | ENSMUSG00000030216  | Transcript        | ENSMUST00000204272 | nonsense_mediated_decay       | rs36710304   |
| 6:136820052-136820052 | intron_variant                  | MODIFIER | Wbp11    | ENSMUSG00000030216  | Transcript        | ENSMUST00000116514 | protein_coding                | rs30564926   |
| 6:136820052-136820052 | downstream gene variant         | MODIFIER | Wbp11    | ENSMUSG00000030216  | Transcript        | ENSMUST00000141598 | retained intron               | rs30564926   |
| 6:136820052-136820052 | non coding transcript exon var  | MODIFIER | Wbp11    | ENSMUSG00000030216  | Transcript        | ENSMUST00000151333 | retained intron               | rs30564926   |
| 6:136820052-136820052 | intron variant                  | MODIFIER | Wbp11    | ENSMUSG00000030216  | Transcript        | ENSMUST00000204129 | protein_coding                | rs30564926   |
| 6:136820052-136820052 | intron variant,NMD transcript v | MODIFIER | Wbp11    | ENSMUSG00000030216  | Transcript        | ENSMUST00000204272 | nonsense mediated decay       | rs30564926   |
| 6:137419769-137419769 | intron_variant                  | MODIFIER | Ptpro    | ENSMUSG00000030223  | Transcript        | ENSMUST00000077115 | protein_coding                | rs579307928  |
| 6:137419769-137419769 | intron variant                  | MODIFIER | Ptpro    | ENSMUSG00000030223  | Transcript        | ENSMUST00000167002 | protein_coding                | rs579307928  |
| 6:137419769-137419769 | intron_variant                  | MODIFIER | Ptpro    | ENSMUSG00000030223  | Transcript        | ENSMUST00000167679 | protein_coding                | rs579307928  |





|                       |                                 |          |         |                     |                   |                    |                          |             |
|-----------------------|---------------------------------|----------|---------|---------------------|-------------------|--------------------|--------------------------|-------------|
| 6:137426834-137426834 | intron variant                  | MODIFIER | Ptpro   | ENSMUSG00000030223  | Transcript        | ENSMUST00000077115 | protein coding           | rs31945198  |
| 6:137426834-137426834 | intron_variant                  | MODIFIER | Ptpro   | ENSMUSG00000030223  | Transcript        | ENSMUST00000167002 | protein_coding           | rs31945198  |
| 6:137426834-137426834 | intron_variant                  | MODIFIER | Ptpro   | ENSMUSG00000030223  | Transcript        | ENSMUST00000167679 | protein_coding           | rs31945198  |
| 6:137426834-137426834 | intron_variant                  | MODIFIER | Ptpro   | ENSMUSG00000030223  | Transcript        | ENSMUST00000203914 | protein_coding           | rs31945198  |
| 6:137426834-137426834 | upstream gene variant           | MODIFIER | Gm44258 | ENSMUSG00000107759  | Transcript        | ENSMUST00000204925 | sense intronic           | rs31945198  |
| 6:137456368-137456368 | intron variant                  | MODIFIER | Ptpro   | ENSMUSG00000030223  | Transcript        | ENSMUST00000077115 | protein coding           | rs263957631 |
| 6:137456368-137456368 | intron_variant                  | MODIFIER | Ptpro   | ENSMUSG00000030223  | Transcript        | ENSMUST00000167002 | protein coding           | rs263957631 |
| 6:137456368-137456368 | intron_variant                  | MODIFIER | Ptpro   | ENSMUSG00000030223  | Transcript        | ENSMUST00000167679 | protein_coding           | rs263957631 |
| 6:137456368-137456368 | intron_variant,non_coding_trans | MODIFIER | Ptpro   | ENSMUSG00000030223  | Transcript        | ENSMUST00000203127 | processed_transcript     | rs263957631 |
| 6:137456368-137456368 | intron_variant,non_coding_trans | MODIFIER | Ptpro   | ENSMUSG00000030223  | Transcript        | ENSMUST00000203255 | processed_transcript     | rs263957631 |
| 6:137456368-137456368 | intron variant                  | MODIFIER | Ptpro   | ENSMUSG00000030223  | Transcript        | ENSMUST00000203914 | protein coding           | rs263957631 |
| 6:137456368-137456368 | regulatory region variant       | MODIFIER | -       | -                   | RegulatoryFeature | ENSMUSR00000237069 | promoter flanking region | rs263957631 |
| 6:137456368-137456368 | regulatory region variant       | MODIFIER | -       | -                   | RegulatoryFeature | ENSMUSR00000440728 | CTCF binding site        | rs263957631 |
| 6:137591460-137591460 | 5 prime UTR variant             | MODIFIER | Eps8    | ENSMUSG00000015766  | Transcript        | ENSMUST00000058210 | protein coding           | rs31961149  |
| 6:137591460-137591460 | intron_variant                  | MODIFIER | Eps8    | ENSMUSG00000015766  | Transcript        | ENSMUST00000111878 | protein_coding           | rs31961149  |
| 6:137591460-137591460 | 5_prime_UTR_variant             | MODIFIER | Eps8    | ENSMUSG00000015766  | Transcript        | ENSMUST00000132920 | protein_coding           | rs31961149  |
| 6:137591460-137591460 | 5_prime_UTR_variant             | MODIFIER | Eps8    | ENSMUSG00000015766  | Transcript        | ENSMUST00000134630 | protein_coding           | rs31961149  |
| 6:137591460-137591460 | 5 prime UTR variant             | MODIFIER | Eps8    | ENSMUSG00000015766  | Transcript        | ENSMUST00000139753 | protein coding           | rs31961149  |
| 6:137591460-137591460 | upstream gene variant           | MODIFIER | Eps8    | ENSMUSG00000015766  | Transcript        | ENSMUST00000146442 | protein coding           | rs31961149  |
| 6:137591460-137591460 | 5 prime UTR variant             | MODIFIER | Eps8    | ENSMUSG00000015766  | Transcript        | ENSMUST00000147526 | protein coding           | rs31961149  |
| 6:137591460-137591460 | non_coding_transcript_exon_var  | MODIFIER | Eps8    | ENSMUSG00000015766  | Transcript        | ENSMUST00000153933 | processed_transcript     | rs31961149  |
| 6:137591460-137591460 | downstream_gene_variant         | MODIFIER | Gm44106 | ENSMUSG000000107878 | Transcript        | ENSMUST00000203153 | TEC                      | rs31961149  |
| 6:49060548-49060548   | downstream_gene_variant         | MODIFIER | Gpnm    | ENSMUSG00000029816  | Transcript        | ENSMUST00000031840 | protein_coding           | -           |
| 6:49060548-49060548   | intron variant                  | MODIFIER | Gpnm    | ENSMUSG00000029816  | Transcript        | ENSMUST00000204260 | protein coding           | -           |
| 6:49060650-49060650   | downstream gene variant         | MODIFIER | Gpnm    | ENSMUSG00000029816  | Transcript        | ENSMUST00000031840 | protein coding           | -           |
| 6:49060650-49060650   | intron variant                  | MODIFIER | Gpnm    | ENSMUSG00000029816  | Transcript        | ENSMUST00000204260 | protein coding           | -           |
| 6:49060650-49060650   | intron variant                  | MODIFIER | Trim30a | ENSMUSG00000030921  | Transcript        | ENSMUST00000076922 | protein coding           | rs240281407 |
| 7:104422219-104422221 | upstream_gene_variant           | MODIFIER | Gm25405 | ENSMUSG00000064907  | Transcript        | ENSMUST00000082973 | snRNA                    | rs240281407 |
| 7:131560495-131560495 | downstream_gene_variant         | MODIFIER | Hmx2    | ENSMUSG00000050100  | Transcript        | ENSMUST00000051997 | protein_coding           | rs220532262 |
| 7:131560495-131560495 | intron_variant                  | MODIFIER | Bub3    | ENSMUSG00000066979  | Transcript        | ENSMUST00000084502 | protein_coding           | rs220532262 |
| 7:131560495-131560495 | intron variant                  | MODIFIER | Fgfr2   | ENSMUSG00000030849  | Transcript        | ENSMUST00000124096 | protein coding           | rs220532262 |
| 7:131560495-131560495 | downstream gene variant         | MODIFIER | Hmx2    | ENSMUSG00000050100  | Transcript        | ENSMUST00000183219 | protein coding           | rs220532262 |
| 7:131560495-131560495 | intron variant                  | MODIFIER | Bub3    | ENSMUSG00000066979  | Transcript        | ENSMUST00000207231 | protein coding           | rs220532262 |
| 7:131560495-131560495 | upstream_gene_variant           | MODIFIER | Bub3    | ENSMUSG00000066979  | Transcript        | ENSMUST00000207442 | protein_coding           | rs220532262 |
| 7:131560495-131560495 | intron_variant,NMD transcript v | MODIFIER | Bub3    | ENSMUSG00000066979  | Transcript        | ENSMUST00000207736 | nonsense mediated decay  | rs220532262 |
| 7:131560495-131560495 | upstream_gene_variant           | MODIFIER | Bub3    | ENSMUSG00000066979  | Transcript        | ENSMUST00000208571 | protein_coding           | rs220532262 |
| 7:131560495-131560495 | intron variant,non coding trans | MODIFIER | Bub3    | ENSMUSG00000066979  | Transcript        | ENSMUST00000208848 | retained intron          | rs220532262 |
| 7:131560495-131560495 | non coding transcript exon var  | MODIFIER | Bub3    | ENSMUSG00000066979  | Transcript        | ENSMUST00000209131 | retained intron          | rs220532262 |
| 7:131560495-131560495 | regulatory region variant       | MODIFIER | -       | -                   | RegulatoryFeature | ENSMUSR00000252764 | promoter                 | rs220532262 |
| 7:131563071-131563071 | intron variant                  | MODIFIER | Bub3    | ENSMUSG00000066979  | Transcript        | ENSMUST00000084502 | protein coding           | rs107706529 |
| 7:131563071-131563071 | intron_variant                  | MODIFIER | Fgfr2   | ENSMUSG00000030849  | Transcript        | ENSMUST00000124096 | protein_coding           | rs107706529 |
| 7:131563071-131563071 | intron_variant                  | MODIFIER | Bub3    | ENSMUSG00000066979  | Transcript        | ENSMUST00000207231 | protein_coding           | rs107706529 |
| 7:131563071-131563071 | intron_variant                  | MODIFIER | Bub3    | ENSMUSG00000066979  | Transcript        | ENSMUST00000207442 | protein_coding           | rs107706529 |
| 7:131563071-131563071 | intron variant,NMD transcript v | MODIFIER | Bub3    | ENSMUSG00000066979  | Transcript        | ENSMUST00000207736 | nonsense mediated decay  | rs107706529 |
| 7:131563071-131563071 | intron variant                  | MODIFIER | Bub3    | ENSMUSG00000066979  | Transcript        | ENSMUST00000208571 | protein coding           | rs107706529 |
| 7:131563071-131563071 | downstream gene variant         | MODIFIER | Bub3    | ENSMUSG00000066979  | Transcript        | ENSMUST00000208848 | retained intron          | rs107706529 |
| 7:131563071-131563071 | non_coding_transcript_exon_var  | MODIFIER | Bub3    | ENSMUSG00000066979  | Transcript        | ENSMUST00000209131 | retained_intron          | rs107706529 |
| 7:131563086-131563086 | intron variant                  | MODIFIER | Bub3    | ENSMUSG00000066979  | Transcript        | ENSMUST00000084502 | protein_coding           | rs31508888  |
| 7:131563086-131563086 | intron_variant                  | MODIFIER | Fgfr2   | ENSMUSG00000030849  | Transcript        | ENSMUST00000124096 | protein_coding           | rs31508888  |
| 7:131563086-131563086 | intron variant                  | MODIFIER | Bub3    | ENSMUSG00000066979  | Transcript        | ENSMUST00000207231 | protein coding           | rs31508888  |
| 7:131563086-131563086 | intron variant                  | MODIFIER | Bub3    | ENSMUSG00000066979  | Transcript        | ENSMUST00000207442 | protein coding           | rs31508888  |
| 7:131563086-131563086 | intron variant,NMD transcript v | MODIFIER | Bub3    | ENSMUSG00000066979  | Transcript        | ENSMUST00000207736 | nonsense mediated decay  | rs31508888  |
| 7:131563086-131563086 | intron variant                  | MODIFIER | Bub3    | ENSMUSG00000066979  | Transcript        | ENSMUST00000208571 | protein coding           | rs31508888  |
| 7:131563086-131563086 | downstream_gene_variant         | MODIFIER | Bub3    | ENSMUSG00000066979  | Transcript        | ENSMUST00000208848 | retained_intron          | rs31508888  |
| 7:131563086-131563086 | non_coding_transcript_exon_var  | MODIFIER | Bub3    | ENSMUSG00000066979  | Transcript        | ENSMUST00000209131 | retained_intron          | rs31508888  |
| 7:131573423-131573423 | downstream_gene_variant         | MODIFIER | Bub3    | ENSMUSG00000066979  | Transcript        | ENSMUST00000084502 | protein_coding           | rs47203548  |
| 7:131573423-131573423 | intron variant                  | MODIFIER | Fgfr2   | ENSMUSG00000030849  | Transcript        | ENSMUST00000124096 | protein coding           | rs47203548  |
| 7:131573423-131573423 | downstream gene variant         | MODIFIER | Bub3    | ENSMUSG00000066979  | Transcript        | ENSMUST00000207442 | protein coding           | rs47203548  |
| 7:131573423-131573423 | downstream gene variant         | MODIFIER | Bub3    | ENSMUSG00000066979  | Transcript        | ENSMUST00000207736 | nonsense mediated decay  | rs47203548  |
| 7:131573423-131573423 | downstream_gene_variant         | MODIFIER | Bub3    | ENSMUSG00000066979  | Transcript        | ENSMUST00000208571 | protein_coding           | rs47203548  |
| 7:131573423-131573423 | downstream_gene_variant         | MODIFIER | Bub3    | ENSMUSG00000066979  | Transcript        | ENSMUST00000209131 | retained_intron          | rs47203548  |
| 7:139426540-139426540 | intron_variant                  | MODIFIER | Inpp5a  | ENSMUSG00000025477  | Transcript        | ENSMUST00000026550 | protein_coding           | -           |
| 7:139426540-139426540 | intron variant                  | MODIFIER | Inpp5a  | ENSMUSG00000025477  | Transcript        | ENSMUST00000097975 | protein coding           | -           |
| 7:139426540-139426540 | intron variant                  | MODIFIER | Inpp5a  | ENSMUSG00000025477  | Transcript        | ENSMUST00000106098 | protein coding           | -           |
| 7:142577095-142577095 | non coding transcript exon var  | MODIFIER | Mir675  | ENSMUSG00000076275  | Transcript        | ENSMUST00000102320 | miRNA                    | -           |
| 7:142577095-142577095 | upstream gene variant           | MODIFIER | H19     | ENSMUSG00000000031  | Transcript        | ENSMUST00000132294 | lincRNA                  | -           |
| 7:142577095-142577095 | non_coding_transcript_exon_var  | MODIFIER | H19     | ENSMUSG00000000031  | Transcript        | ENSMUST00000136359 | lincRNA                  | -           |
| 7:142577095-142577095 | upstream_gene_variant           | MODIFIER | H19     | ENSMUSG00000000031  | Transcript        | ENSMUST00000140716 | lincRNA                  | -           |
| 7:142577095-142577095 | intron_variant,non_coding_trans | MODIFIER | H19     | ENSMUSG00000000031  | Transcript        | ENSMUST00000149974 | lincRNA                  | -           |

|                       |                                 |          |         |                     |                   |                      |                         |             |
|-----------------------|---------------------------------|----------|---------|---------------------|-------------------|----------------------|-------------------------|-------------|
| 7:142577095-142577095 | non coding transcript exon var  | MODIFIER | H19     | ENSMUSG00000000031  | Transcript        | ENSMUST00000152754   | lincRNA                 | -           |
| 7:142577095-142577095 | upstream_gene_variant           | MODIFIER | Gm27786 | ENSMUSG000000098816 | Transcript        | ENSMUST00000184337   | misc_RNA                | -           |
| 7:142577095-142577095 | downstream_gene_variant         | MODIFIER | Gm27483 | ENSMUSG000000099143 | Transcript        | ENSMUST00000184983   | misc_RNA                | -           |
| 7:142577095-142577095 | non_coding_transcript_exon_var  | MODIFIER | H19     | ENSMUSG00000000031  | Transcript        | ENSMUST00000228259   | lincRNA                 | -           |
| 7:142577095-142577095 | upstream gene variant           | MODIFIER | H19     | ENSMUSG00000000031  | Transcript        | ENSMUST00000228514   | lincRNA                 | -           |
| 7:142577095-142577095 | regulatory region variant       | MODIFIER | -       | -                   | RegulatoryFeature | ENSMUSFR000000726612 | promoter                | -           |
| 7:144921119-144921119 | 3 prime UTR variant             | MODIFIER | Oraov1  | ENSMUSG000000031072 | Transcript        | ENSMUST00000033388   | protein coding          | rs32195639  |
| 7:144921119-144921119 | downstream_gene_variant         | MODIFIER | Oraov1  | ENSMUSG000000031072 | Transcript        | ENSMUST00000093964   | retained_intron         | rs32195639  |
| 7:144921119-144921119 | intron_variant                  | MODIFIER | Oraov1  | ENSMUSG000000031072 | Transcript        | ENSMUST00000105895   | protein_coding          | rs32195639  |
| 7:144921119-144921119 | intron_variant                  | MODIFIER | Oraov1  | ENSMUSG000000031072 | Transcript        | ENSMUST00000128057   | protein_coding          | rs32195639  |
| 7:144921119-144921119 | downstream gene variant         | MODIFIER | Oraov1  | ENSMUSG000000031072 | Transcript        | ENSMUST00000141737   | protein coding          | rs32195639  |
| 7:144921119-144921119 | downstream gene variant         | MODIFIER | Oraov1  | ENSMUSG000000031072 | Transcript        | ENSMUST00000147460   | retained intron         | rs32195639  |
| 7:144921119-144921119 | non coding transcript exon var  | MODIFIER | Oraov1  | ENSMUSG000000031072 | Transcript        | ENSMUST00000207094   | retained intron         | rs32195639  |
| 7:144921119-144921119 | intron variant                  | MODIFIER | Oraov1  | ENSMUSG000000031072 | Transcript        | ENSMUST00000207453   | protein coding          | rs32195639  |
| 7:144921596-144921596 | downstream_gene_variant         | MODIFIER | Oraov1  | ENSMUSG000000031072 | Transcript        | ENSMUST00000033388   | protein_coding          | rs31055079  |
| 7:144921596-144921596 | downstream_gene_variant         | MODIFIER | Oraov1  | ENSMUSG000000031072 | Transcript        | ENSMUST00000093964   | retained_intron         | rs31055079  |
| 7:144921596-144921596 | intron_variant                  | MODIFIER | Oraov1  | ENSMUSG000000031072 | Transcript        | ENSMUST00000105895   | protein_coding          | rs31055079  |
| 7:144921596-144921596 | intron variant                  | MODIFIER | Oraov1  | ENSMUSG000000031072 | Transcript        | ENSMUST00000128057   | protein_coding          | rs31055079  |
| 7:144921596-144921596 | downstream gene variant         | MODIFIER | Oraov1  | ENSMUSG000000031072 | Transcript        | ENSMUST00000147460   | retained intron         | rs31055079  |
| 7:144921596-144921596 | non coding transcript exon var  | MODIFIER | Oraov1  | ENSMUSG000000031072 | Transcript        | ENSMUST00000207094   | retained intron         | rs31055079  |
| 7:144921596-144921596 | intron_variant                  | MODIFIER | Oraov1  | ENSMUSG000000031072 | Transcript        | ENSMUST00000207453   | protein_coding          | rs31055079  |
| 7:145248398-145248398 | intron_variant,NMD transcript v | MODIFIER | Tpcn2   | ENSMUSG00000048677  | Transcript        | ENSMUST00000208328   | nonsense_mediated_decay | rs238736247 |
| 7:145248398-145248398 | intron_variant,NMD transcript v | MODIFIER | Tpcn2   | ENSMUSG00000048677  | Transcript        | ENSMUST00000209047   | nonsense_mediated_decay | rs238736247 |
| 7:145250874-145250874 | downstream gene variant         | MODIFIER | Tpcn2   | ENSMUSG00000048677  | Transcript        | ENSMUST00000058022   | protein coding          | rs48206549  |
| 7:145250874-145250874 | downstream gene variant         | MODIFIER | Tpcn2   | ENSMUSG00000048677  | Transcript        | ENSMUST00000208148   | nonsense mediated decay | rs48206549  |
| 7:145250874-145250874 | intron variant,NMD transcript v | MODIFIER | Tpcn2   | ENSMUSG00000048677  | Transcript        | ENSMUST00000208328   | nonsense mediated decay | rs48206549  |
| 7:145250874-145250874 | downstream gene variant         | MODIFIER | Tpcn2   | ENSMUSG00000048677  | Transcript        | ENSMUST00000208841   | nonsense mediated decay | rs48206549  |
| 7:145250874-145250874 | downstream_gene_variant         | MODIFIER | Tpcn2   | ENSMUSG00000048677  | Transcript        | ENSMUST00000208867   | retained_intron         | rs48206549  |
| 7:145250874-145250874 | intron_variant,NMD transcript v | MODIFIER | Tpcn2   | ENSMUSG00000048677  | Transcript        | ENSMUST00000209047   | nonsense_mediated_decay | rs48206549  |
| 7:145260582-145260582 | intron_variant                  | MODIFIER | Tpcn2   | ENSMUSG00000048677  | Transcript        | ENSMUST00000058022   | protein_coding          | rs31433618  |
| 7:145260582-145260582 | intron variant,NMD transcript v | MODIFIER | Tpcn2   | ENSMUSG00000048677  | Transcript        | ENSMUST00000208148   | nonsense mediated decay | rs31433618  |
| 7:145260582-145260582 | downstream gene variant         | MODIFIER | Tpcn2   | ENSMUSG00000048677  | Transcript        | ENSMUST00000208281   | retained intron         | rs31433618  |
| 7:145260582-145260582 | intron variant,NMD transcript v | MODIFIER | Tpcn2   | ENSMUSG00000048677  | Transcript        | ENSMUST00000208328   | nonsense mediated decay | rs31433618  |
| 7:145260582-145260582 | intron_variant,NMD transcript v | MODIFIER | Tpcn2   | ENSMUSG00000048677  | Transcript        | ENSMUST00000208841   | nonsense_mediated_decay | rs31433618  |
| 7:145260582-145260582 | upstream_gene_variant           | MODIFIER | Tpcn2   | ENSMUSG00000048677  | Transcript        | ENSMUST00000208867   | retained_intron         | rs31433618  |
| 7:145260582-145260582 | intron_variant,NMD transcript v | MODIFIER | Tpcn2   | ENSMUSG00000048677  | Transcript        | ENSMUST00000209047   | nonsense_mediated_decay | rs31433618  |
| 7:45491353-45491353   | upstream gene variant           | MODIFIER | Dhdh    | ENSMUSG00000011382  | Transcript        | ENSMUST00000011526   | protein coding          | -           |
| 7:45491353-45491353   | downstream gene variant         | MODIFIER | Nucb1   | ENSMUSG00000030824  | Transcript        | ENSMUST00000033096   | protein coding          | -           |
| 7:45491353-45491353   | intron variant                  | MODIFIER | Tulp2   | ENSMUSG00000023467  | Transcript        | ENSMUST00000107758   | protein coding          | -           |
| 7:45491353-45491353   | intron variant                  | MODIFIER | Tulp2   | ENSMUSG00000023467  | Transcript        | ENSMUST00000107759   | protein coding          | -           |
| 7:45491353-45491353   | downstream_gene_variant         | MODIFIER | Nucb1   | ENSMUSG00000030824  | Transcript        | ENSMUST00000210394   | retained_intron         | -           |
| 7:45491353-45491353   | upstream_gene_variant           | MODIFIER | Dhdh    | ENSMUSG00000011382  | Transcript        | ENSMUST00000210440   | retained_intron         | -           |
| 7:45491353-45491353   | downstream_gene_variant         | MODIFIER | Nucb1   | ENSMUSG00000030824  | Transcript        | ENSMUST00000210449   | protein_coding          | -           |
| 7:45491353-45491353   | upstream gene variant           | MODIFIER | Gm45808 | ENSMUSG00000109926  | Transcript        | ENSMUST00000210701   | protein coding          | -           |
| 7:45491353-45491353   | intron variant                  | MODIFIER | Tulp2   | ENSMUSG00000023467  | Transcript        | ENSMUST00000210813   | protein coding          | -           |
| 7:45491353-45491353   | intron variant,non coding trans | MODIFIER | Tulp2   | ENSMUSG00000023467  | Transcript        | ENSMUST00000211413   | processed transcript    | -           |
| 7:45491353-45491353   | 3_prime_UTR_variant             | MODIFIER | Nucb1   | ENSMUSG00000030824  | Transcript        | ENSMUST00000211765   | protein_coding          | -           |
| 7:53887319-53887319   | downstream_gene_variant         | MODIFIER | Mir6238 | ENSMUSG00000099176  | Transcript        | ENSMUST00000184140   | miRNA                   | -           |
| 7:66088512-66088512   | intron_variant                  | MODIFIER | Selenos | ENSMUSG00000075701  | Transcript        | ENSMUST00000101801   | protein_coding          | rs51677780  |
| 7:66088512-66088512   | intron variant,NMD transcript v | MODIFIER | Selenos | ENSMUSG00000075701  | Transcript        | ENSMUST00000205279   | nonsense mediated decay | rs51677780  |
| 7:66088512-66088512   | downstream gene variant         | MODIFIER | Selenos | ENSMUSG00000075701  | Transcript        | ENSMUST00000205965   | retained intron         | rs51677780  |
| 7:66088512-66088512   | intron variant                  | MODIFIER | Selenos | ENSMUSG00000075701  | Transcript        | ENSMUST00000206044   | protein coding          | rs51677780  |
| 7:66088512-66088512   | intron variant                  | MODIFIER | Selenos | ENSMUSG00000075701  | Transcript        | ENSMUST00000206575   | protein coding          | rs51677780  |
| 7:66261453-66261453   | intron_variant                  | MODIFIER | Lrrk1   | ENSMUSG00000015133  | Transcript        | ENSMUST00000015277   | protein_coding          | rs33075151  |
| 7:66261453-66261453   | downstream_gene_variant         | MODIFIER | Lrrk1   | ENSMUSG00000015133  | Transcript        | ENSMUST00000131239   | retained_intron         | rs33075151  |
| 7:66261453-66261453   | intron_variant,non coding trans | MODIFIER | Lrrk1   | ENSMUSG00000015133  | Transcript        | ENSMUST00000137181   | retained_intron         | rs33075151  |
| 7:66261453-66261453   | intron variant,NMD transcript v | MODIFIER | Lrrk1   | ENSMUSG00000015133  | Transcript        | ENSMUST00000145954   | nonsense mediated decay | rs33075151  |
| 7:66261453-66261453   | intron variant,non coding trans | MODIFIER | Lrrk1   | ENSMUSG00000015133  | Transcript        | ENSMUST00000167705   | processed transcript    | rs33075151  |
| 7:66261453-66261453   | regulatory region variant       | MODIFIER | -       | -                   | RegulatoryFeature | ENSMUSFR00000244361  | enhancer                | rs33075151  |
| 7:68739750-68739750   | intron_variant                  | MODIFIER | Arrdc4  | ENSMUSG00000042659  | Transcript        | ENSMUST00000048068   | protein_coding          | rs31139207  |
| 7:68739750-68739750   | downstream_gene_variant         | MODIFIER | Arrdc4  | ENSMUSG00000042659  | Transcript        | ENSMUST00000118110   | protein_coding          | rs31139207  |
| 7:78792010-78792012   | intron_variant                  | MODIFIER | Mrps11  | ENSMUSG00000030611  | Transcript        | ENSMUST00000032804   | protein_coding          | rs237955066 |
| 7:78792010-78792012   | downstream gene variant         | MODIFIER | Mrps11  | ENSMUSG00000030611  | Transcript        | ENSMUST00000123706   | retained intron         | rs237955066 |
| 7:78792010-78792012   | downstream gene variant         | MODIFIER | Mrps11  | ENSMUSG00000030611  | Transcript        | ENSMUST00000132922   | retained intron         | rs237955066 |
| 7:78792010-78792012   | downstream gene variant         | MODIFIER | Mrps11  | ENSMUSG00000030611  | Transcript        | ENSMUST00000133304   | retained intron         | rs237955066 |
| 7:78792010-78792012   | intron variant,NMD transcript v | MODIFIER | Mrps11  | ENSMUSG00000030611  | Transcript        | ENSMUST00000133553   | nonsense mediated decay | rs237955066 |
| 7:78792010-78792012   | downstream_gene_variant         | MODIFIER | Mrps11  | ENSMUSG00000030611  | Transcript        | ENSMUST00000136001   | retained_intron         | rs237955066 |
| 7:80241632-80241632   | upstream_gene_variant           | MODIFIER | Ttlf13  | ENSMUSG00000045467  | Transcript        | ENSMUST00000058266   | protein_coding          | rs50789410  |
| 7:80241632-80241632   | 3_prime_UTR_variant             | MODIFIER | Gdpgp1  | ENSMUSG00000050973  | Transcript        | ENSMUST00000062915   | protein_coding          | rs50789410  |

|                     |                                 |          |               |                    |                   |                    |                         |            |
|---------------------|---------------------------------|----------|---------------|--------------------|-------------------|--------------------|-------------------------|------------|
| 7:80241632-80241632 | upstream gene variant           | MODIFIER | Tlll13        | ENSMUSG00000045467 | Transcript        | ENSMUST00000107381 | retained intron         | rs50789410 |
| 7:80241632-80241632 | upstream_gene_variant           | MODIFIER | Gm15504       | ENSMUSG00000082954 | Transcript        | ENSMUST00000119674 | processed_pseudogene    | rs50789410 |
| 7:80241632-80241632 | upstream_gene_variant           | MODIFIER | Tlll13        | ENSMUSG00000045467 | Transcript        | ENSMUST00000206240 | retained intron         | rs50789410 |
| 7:80241632-80241632 | regulatory_region_variant       | MODIFIER | -             | -                  | RegulatoryFeature | ENSMUSR00000718478 | enhancer                | rs50789410 |
| 7:80288609-80288609 | intron variant                  | MODIFIER | Vps33b        | ENSMUSG00000030534 | Transcript        | ENSMUST00000032749 | protein coding          | rs31052201 |
| 7:80288609-80288609 | downstream gene variant         | MODIFIER | Vps33b        | ENSMUSG00000030534 | Transcript        | ENSMUST00000128254 | retained intron         | rs31052201 |
| 7:80288609-80288609 | downstream gene variant         | MODIFIER | Rccd1         | ENSMUSG00000038930 | Transcript        | ENSMUST00000130888 | retained intron         | rs31052201 |
| 7:80288609-80288609 | intron_variant,NMD_transcript_v | MODIFIER | Vps33b        | ENSMUSG00000030534 | Transcript        | ENSMUST00000135053 | nonsense mediated decay | rs31052201 |
| 7:80288609-80288609 | upstream_gene_variant           | MODIFIER | Vps33b        | ENSMUSG00000030534 | Transcript        | ENSMUST00000135470 | retained intron         | rs31052201 |
| 7:80288609-80288609 | downstream_gene_variant         | MODIFIER | Vps33b        | ENSMUSG00000030534 | Transcript        | ENSMUST00000145594 | processed_transcript    | rs31052201 |
| 7:80288609-80288609 | intron variant,NMD transcript v | MODIFIER | Vps33b        | ENSMUSG00000030534 | Transcript        | ENSMUST00000150585 | nonsense mediated decay | rs31052201 |
| 7:80288609-80288609 | upstream gene variant           | MODIFIER | Vps33b        | ENSMUSG00000030534 | Transcript        | ENSMUST00000205864 | protein coding          | rs31052201 |
| 7:80289898-80289898 | intron variant                  | MODIFIER | Vps33b        | ENSMUSG00000030534 | Transcript        | ENSMUST00000032749 | protein coding          | rs3697747  |
| 7:80289898-80289898 | upstream gene variant           | MODIFIER | Prc1          | ENSMUSG00000038943 | Transcript        | ENSMUST00000047558 | protein coding          | rs3697747  |
| 7:80289898-80289898 | downstream_gene_variant         | MODIFIER | Vps33b        | ENSMUSG00000030534 | Transcript        | ENSMUST00000128254 | retained intron         | rs3697747  |
| 7:80289898-80289898 | downstream_gene_variant         | MODIFIER | Rccd1         | ENSMUSG00000038930 | Transcript        | ENSMUST00000130888 | retained intron         | rs3697747  |
| 7:80289898-80289898 | intron_variant,NMD_transcript_v | MODIFIER | Vps33b        | ENSMUSG00000030534 | Transcript        | ENSMUST00000135053 | nonsense mediated decay | rs3697747  |
| 7:80289898-80289898 | upstream gene variant           | MODIFIER | Vps33b        | ENSMUSG00000030534 | Transcript        | ENSMUST00000135470 | retained intron         | rs3697747  |
| 7:80289898-80289898 | intron variant,NMD transcript v | MODIFIER | Vps33b        | ENSMUSG00000030534 | Transcript        | ENSMUST00000150585 | nonsense mediated decay | rs3697747  |
| 7:80289898-80289898 | upstream gene variant           | MODIFIER | Prc1          | ENSMUSG00000038943 | Transcript        | ENSMUST00000163812 | protein coding          | rs3697747  |
| 7:80289898-80289898 | upstream_gene_variant           | MODIFIER | Prc1          | ENSMUSG00000038943 | Transcript        | ENSMUST00000172911 | retained intron         | rs3697747  |
| 7:80289898-80289898 | upstream_gene_variant           | MODIFIER | Prc1          | ENSMUSG00000038943 | Transcript        | ENSMUST00000173824 | protein coding          | rs3697747  |
| 7:80289898-80289898 | upstream_gene_variant           | MODIFIER | Prc1          | ENSMUSG00000038943 | Transcript        | ENSMUST00000173914 | retained intron         | rs3697747  |
| 7:80289898-80289898 | upstream gene variant           | MODIFIER | Prc1          | ENSMUSG00000038943 | Transcript        | ENSMUST00000174172 | protein coding          | rs3697747  |
| 7:80289898-80289898 | upstream gene variant           | MODIFIER | Prc1          | ENSMUSG00000038943 | Transcript        | ENSMUST00000174199 | protein coding          | rs3697747  |
| 7:80289898-80289898 | upstream gene variant           | MODIFIER | Vps33b        | ENSMUSG00000030534 | Transcript        | ENSMUST00000205864 | protein coding          | rs3697747  |
| 7:80289898-80289898 | upstream gene variant           | MODIFIER | Prc1          | ENSMUSG00000038943 | Transcript        | ENSMUST00000206178 | retained intron         | rs3697747  |
| 7:80301724-80301724 | intron variant                  | MODIFIER | Prc1          | ENSMUSG00000038943 | Transcript        | ENSMUST00000047558 | protein coding          | rs48150123 |
| 7:80301724-80301724 | intron_variant,non_coding_trans | MODIFIER | Rccd1         | ENSMUSG00000038930 | Transcript        | ENSMUST00000130888 | retained intron         | rs48150123 |
| 7:80301724-80301724 | intron variant                  | MODIFIER | Prc1          | ENSMUSG00000038943 | Transcript        | ENSMUST00000163812 | protein coding          | rs48150123 |
| 7:80301724-80301724 | intron variant,non coding trans | MODIFIER | Prc1          | ENSMUSG00000038943 | Transcript        | ENSMUST00000172911 | retained intron         | rs48150123 |
| 7:80301724-80301724 | upstream gene variant           | MODIFIER | Prc1          | ENSMUSG00000038943 | Transcript        | ENSMUST00000173170 | protein coding          | rs48150123 |
| 7:80301724-80301724 | intron variant                  | MODIFIER | Prc1          | ENSMUSG00000038943 | Transcript        | ENSMUST00000173824 | protein coding          | rs48150123 |
| 7:80301724-80301724 | non_coding_transcript_exon_var  | MODIFIER | Prc1          | ENSMUSG00000038943 | Transcript        | ENSMUST00000173914 | retained intron         | rs48150123 |
| 7:80301724-80301724 | intron variant                  | MODIFIER | Prc1          | ENSMUSG00000038943 | Transcript        | ENSMUST00000174172 | protein coding          | rs48150123 |
| 7:80301724-80301724 | intron variant                  | MODIFIER | Prc1          | ENSMUSG00000038943 | Transcript        | ENSMUST00000174199 | protein coding          | rs48150123 |
| 7:80301724-80301724 | upstream gene variant           | MODIFIER | Prc1          | ENSMUSG00000038943 | Transcript        | ENSMUST00000174254 | retained intron         | rs48150123 |
| 7:80301724-80301724 | upstream gene variant           | MODIFIER | 6330403N20Rik | ENSMUSG00000097912 | Transcript        | ENSMUST00000180467 | lincRNA                 | rs48150123 |
| 7:80301724-80301724 | intron variant,non coding trans | MODIFIER | Prc1          | ENSMUSG00000038943 | Transcript        | ENSMUST00000206178 | retained intron         | rs48150123 |
| 7:80301724-80301724 | regulatory region variant       | MODIFIER | -             | -                  | RegulatoryFeature | ENSMUSR00000718489 | open chromatin region   | rs48150123 |
| 7:80301724-80301724 | regulatory_region_variant       | MODIFIER | -             | -                  | RegulatoryFeature | ENSMUSR00000718490 | CTCF_binding_site       | rs48150123 |
| 7:80327136-80327136 | intron variant                  | MODIFIER | Unc45a        | ENSMUSG00000030533 | Transcript        | ENSMUST00000032748 | protein coding          | rs51330426 |
| 7:80327136-80327136 | upstream_gene_variant           | MODIFIER | Rccd1         | ENSMUSG00000038930 | Transcript        | ENSMUST00000032748 | protein coding          | rs51330426 |
| 7:80327136-80327136 | intron variant                  | MODIFIER | Unc45a        | ENSMUSG00000030533 | Transcript        | ENSMUST00000107368 | protein coding          | rs51330426 |
| 7:80327136-80327136 | upstream gene variant           | MODIFIER | Rccd1         | ENSMUSG00000038930 | Transcript        | ENSMUST00000121882 | protein coding          | rs51330426 |
| 7:80327136-80327136 | upstream gene variant           | MODIFIER | Rccd1         | ENSMUSG00000038930 | Transcript        | ENSMUST00000123109 | retained intron         | rs51330426 |
| 7:80327136-80327136 | upstream_gene_variant           | MODIFIER | Rccd1         | ENSMUSG00000038930 | Transcript        | ENSMUST00000123189 | protein coding          | rs51330426 |
| 7:80327136-80327136 | upstream_gene_variant           | MODIFIER | Rccd1         | ENSMUSG00000038930 | Transcript        | ENSMUST00000134288 | retained intron         | rs51330426 |
| 7:80327136-80327136 | upstream_gene_variant           | MODIFIER | Rccd1         | ENSMUSG00000038930 | Transcript        | ENSMUST00000148001 | retained intron         | rs51330426 |
| 7:80327136-80327136 | intron variant,NMD transcript v | MODIFIER | Unc45a        | ENSMUSG00000030533 | Transcript        | ENSMUST00000154428 | nonsense mediated decay | rs51330426 |
| 7:80327136-80327136 | upstream gene variant           | MODIFIER | Rccd1         | ENSMUSG00000038930 | Transcript        | ENSMUST00000155124 | processed transcript    | rs51330426 |
| 7:80327136-80327136 | upstream gene variant           | MODIFIER | Rccd1         | ENSMUSG00000038930 | Transcript        | ENSMUST00000205863 | retained intron         | rs51330426 |
| 7:80327136-80327136 | intron variant                  | MODIFIER | Unc45a        | ENSMUSG00000030533 | Transcript        | ENSMUST00000206363 | protein coding          | rs51330426 |
| 7:80360231-80360231 | intron variant                  | MODIFIER | Man2a2        | ENSMUSG00000038886 | Transcript        | ENSMUST00000098346 | protein coding          | rs31674024 |
| 7:80360231-80360231 | intron_variant,non_coding_trans | MODIFIER | Man2a2        | ENSMUSG00000038886 | Transcript        | ENSMUST00000205318 | retained intron         | rs31674024 |
| 7:80360231-80360231 | downstream_gene_variant         | MODIFIER | Man2a2        | ENSMUSG00000038886 | Transcript        | ENSMUST00000205535 | retained intron         | rs31674024 |
| 7:80360231-80360231 | intron variant,NMD transcript v | MODIFIER | Man2a2        | ENSMUSG00000038886 | Transcript        | ENSMUST00000205853 | nonsense mediated decay | rs31674024 |
| 7:80360231-80360231 | intron variant,non coding trans | MODIFIER | Man2a2        | ENSMUSG00000038886 | Transcript        | ENSMUST00000206066 | retained intron         | rs31674024 |
| 7:80360231-80360231 | downstream gene variant         | MODIFIER | Man2a2        | ENSMUSG00000038886 | Transcript        | ENSMUST00000206301 | nonsense mediated decay | rs31674024 |
| 7:80360231-80360231 | upstream_gene_variant           | MODIFIER | Man2a2        | ENSMUSG00000038886 | Transcript        | ENSMUST00000206807 | nonsense mediated decay | rs31674024 |
| 7:80360231-80360231 | downstream_gene_variant         | MODIFIER | Man2a2        | ENSMUSG00000038886 | Transcript        | ENSMUST00000206917 | retained intron         | rs31674024 |
| 7:80360231-80360231 | upstream_gene_variant           | MODIFIER | Man2a2        | ENSMUSG00000038886 | Transcript        | ENSMUST00000206973 | retained intron         | rs31674024 |
| 7:80360723-80360723 | intron variant                  | MODIFIER | Man2a2        | ENSMUSG00000038886 | Transcript        | ENSMUST00000098346 | protein coding          | rs49282041 |
| 7:80360723-80360723 | intron variant,non coding trans | MODIFIER | Man2a2        | ENSMUSG00000038886 | Transcript        | ENSMUST00000205318 | retained intron         | rs49282041 |
| 7:80360723-80360723 | non coding transcript exon var  | MODIFIER | Man2a2        | ENSMUSG00000038886 | Transcript        | ENSMUST00000205535 | retained intron         | rs49282041 |
| 7:80360723-80360723 | intron variant,NMD transcript v | MODIFIER | Man2a2        | ENSMUSG00000038886 | Transcript        | ENSMUST00000205853 | nonsense mediated decay | rs49282041 |
| 7:80360723-80360723 | intron_variant,non_coding_trans | MODIFIER | Man2a2        | ENSMUSG00000038886 | Transcript        | ENSMUST00000206066 | retained intron         | rs49282041 |
| 7:80360723-80360723 | 3_prime_UTR_variant,NMD_trar    | MODIFIER | Man2a2        | ENSMUSG00000038886 | Transcript        | ENSMUST00000206301 | nonsense mediated decay | rs49282041 |
| 7:80360723-80360723 | upstream_gene_variant           | MODIFIER | Man2a2        | ENSMUSG00000038886 | Transcript        | ENSMUST00000206807 | nonsense mediated decay | rs49282041 |

clal\_RF

|                     |                                 |          |               |                     |                   |                    |                         |             |
|---------------------|---------------------------------|----------|---------------|---------------------|-------------------|--------------------|-------------------------|-------------|
| 7:80360723-80360723 | downstream gene variant         | MODIFIER | Man2a2        | ENSMUSG00000038886  | Transcript        | ENSMUST00000206917 | retained intron         | rs49282041  |
| 7:80360723-80360723 | upstream_gene_variant           | MODIFIER | Man2a2        | ENSMUSG00000038886  | Transcript        | ENSMUST00000206973 | retained_intron         | rs49282041  |
| 7:80401951-80401951 | intron_variant                  | MODIFIER | Furin         | ENSMUSG00000030530  | Transcript        | ENSMUST00000107362 | protein_coding          | rs217652626 |
| 7:80401951-80401951 | upstream_gene_variant           | MODIFIER | Furin         | ENSMUSG00000030530  | Transcript        | ENSMUST00000120753 | protein_coding          | rs217652626 |
| 7:80401951-80401951 | intron variant                  | MODIFIER | Furin         | ENSMUSG00000030530  | Transcript        | ENSMUST00000122232 | protein_coding          | rs217652626 |
| 7:80401951-80401951 | intron variant                  | MODIFIER | Furin         | ENSMUSG00000030530  | Transcript        | ENSMUST00000135306 | protein_coding          | rs217652626 |
| 7:80401951-80401951 | intron variant                  | MODIFIER | Furin         | ENSMUSG00000030530  | Transcript        | ENSMUST00000147150 | protein_coding          | rs217652626 |
| 7:80401951-80401951 | upstream_gene_variant           | MODIFIER | Furin         | ENSMUSG00000030530  | Transcript        | ENSMUST00000153446 | retained_intron         | rs217652626 |
| 7:80401951-80401951 | upstream_gene_variant           | MODIFIER | Gm44851       | ENSMUSG00000108436  | Transcript        | ENSMUST00000205735 | antisense               | rs217652626 |
| 7:80401951-80401951 | intron_variant,NMD_transcript_v | MODIFIER | Furin         | ENSMUSG00000030530  | Transcript        | ENSMUST00000206352 | nonsense_mediated_decay | rs217652626 |
| 7:80401951-80401951 | regulatory region variant       | MODIFIER | -             | -                   | RegulatoryFeature | ENSMUSR00000246075 | promoter                | rs217652626 |
| 7:81038812-81038812 | intron variant                  | MODIFIER | Zfp592        | ENSMUSG00000005621  | Transcript        | ENSMUST00000107353 | protein_coding          | rs46924364  |
| 7:81038812-81038812 | intron variant,non coding trans | MODIFIER | Zfp592        | ENSMUSG00000005621  | Transcript        | ENSMUST00000125137 | retained intron         | rs46924364  |
| 7:81038812-81038812 | downstream gene variant         | MODIFIER | Zfp592        | ENSMUSG00000005621  | Transcript        | ENSMUST00000149508 | retained intron         | rs46924364  |
| 7:81038900-81038900 | intron_variant                  | MODIFIER | Zfp592        | ENSMUSG00000005621  | Transcript        | ENSMUST00000107353 | protein_coding          | rs47507695  |
| 7:81038900-81038900 | intron_variant,non coding trans | MODIFIER | Zfp592        | ENSMUSG00000005621  | Transcript        | ENSMUST00000125137 | retained_intron         | rs47507695  |
| 7:81038900-81038900 | downstream_gene_variant         | MODIFIER | Zfp592        | ENSMUSG00000005621  | Transcript        | ENSMUST00000149508 | retained_intron         | rs47507695  |
| 7:81524392-81524392 | intron variant,non coding trans | MODIFIER | 2900076A07Rik | ENSMUSG000000097277 | Transcript        | ENSMUST00000180385 | lincRNA                 | rs46097822  |
| 7:81524392-81524392 | upstream gene variant           | MODIFIER | 2900076A07Rik | ENSMUSG000000097277 | Transcript        | ENSMUST00000180705 | lincRNA                 | rs46097822  |
| 7:81524392-81524392 | intron variant,non coding trans | MODIFIER | 2900076A07Rik | ENSMUSG000000097277 | Transcript        | ENSMUST00000180879 | lincRNA                 | rs46097822  |
| 7:81524392-81524392 | upstream_gene_variant           | MODIFIER | 2900076A07Rik | ENSMUSG000000097277 | Transcript        | ENSMUST00000180983 | lincRNA                 | rs46097822  |
| 7:81524392-81524392 | intron_variant,non coding trans | MODIFIER | 2900076A07Rik | ENSMUSG000000097277 | Transcript        | ENSMUST00000181164 | lincRNA                 | rs46097822  |
| 7:81524392-81524392 | intron_variant,non coding trans | MODIFIER | 2900076A07Rik | ENSMUSG000000097277 | Transcript        | ENSMUST00000181264 | lincRNA                 | rs46097822  |
| 7:81524392-81524392 | upstream gene variant           | MODIFIER | 2900076A07Rik | ENSMUSG000000097277 | Transcript        | ENSMUST00000181492 | lincRNA                 | rs46097822  |
| 7:81524392-81524392 | intron variant,non coding trans | MODIFIER | 2900076A07Rik | ENSMUSG000000097277 | Transcript        | ENSMUST00000181903 | lincRNA                 | rs46097822  |
| 7:81524392-81524392 | regulatory region variant       | MODIFIER | -             | -                   | RegulatoryFeature | ENSMUSR00000246354 | promoter                | rs46097822  |
| 7:81524449-81524449 | intron variant,non coding trans | MODIFIER | 2900076A07Rik | ENSMUSG000000097277 | Transcript        | ENSMUST00000180385 | lincRNA                 | rs47445492  |
| 7:81524449-81524449 | upstream_gene_variant           | MODIFIER | 2900076A07Rik | ENSMUSG000000097277 | Transcript        | ENSMUST00000180705 | lincRNA                 | rs47445492  |
| 7:81524449-81524449 | intron_variant,non coding trans | MODIFIER | 2900076A07Rik | ENSMUSG000000097277 | Transcript        | ENSMUST00000180879 | lincRNA                 | rs47445492  |
| 7:81524449-81524449 | upstream_gene_variant           | MODIFIER | 2900076A07Rik | ENSMUSG000000097277 | Transcript        | ENSMUST00000180983 | lincRNA                 | rs47445492  |
| 7:81524449-81524449 | intron variant,non coding trans | MODIFIER | 2900076A07Rik | ENSMUSG000000097277 | Transcript        | ENSMUST00000181164 | lincRNA                 | rs47445492  |
| 7:81524449-81524449 | intron_variant,non coding trans | MODIFIER | 2900076A07Rik | ENSMUSG000000097277 | Transcript        | ENSMUST00000181264 | lincRNA                 | rs47445492  |
| 7:81524449-81524449 | upstream gene variant           | MODIFIER | 2900076A07Rik | ENSMUSG000000097277 | Transcript        | ENSMUST00000181492 | lincRNA                 | rs47445492  |
| 7:81524449-81524449 | intron_variant,non coding trans | MODIFIER | 2900076A07Rik | ENSMUSG000000097277 | Transcript        | ENSMUST00000181903 | lincRNA                 | rs47445492  |
| 7:81524449-81524449 | regulatory_region_variant       | MODIFIER | -             | -                   | RegulatoryFeature | ENSMUSR00000246354 | promoter                | rs47445492  |
| 7:81525518-81525518 | upstream_gene_variant           | MODIFIER | Mir1839       | ENSMUSG000000093107 | Transcript        | ENSMUST00000175366 | scaRNA                  | rs230247527 |
| 7:81525518-81525518 | intron variant,non coding trans | MODIFIER | 2900076A07Rik | ENSMUSG000000097277 | Transcript        | ENSMUST00000180385 | lincRNA                 | rs230247527 |
| 7:81525518-81525518 | upstream gene variant           | MODIFIER | 2900076A07Rik | ENSMUSG000000097277 | Transcript        | ENSMUST00000180705 | lincRNA                 | rs230247527 |
| 7:81525518-81525518 | intron variant,non coding trans | MODIFIER | 2900076A07Rik | ENSMUSG000000097277 | Transcript        | ENSMUST00000180879 | lincRNA                 | rs230247527 |
| 7:81525518-81525518 | upstream gene variant           | MODIFIER | 2900076A07Rik | ENSMUSG000000097277 | Transcript        | ENSMUST00000180983 | lincRNA                 | rs230247527 |
| 7:81525518-81525518 | intron_variant,non coding trans | MODIFIER | 2900076A07Rik | ENSMUSG000000097277 | Transcript        | ENSMUST00000181164 | lincRNA                 | rs230247527 |
| 7:81525518-81525518 | intron_variant,non coding trans | MODIFIER | 2900076A07Rik | ENSMUSG000000097277 | Transcript        | ENSMUST00000181264 | lincRNA                 | rs230247527 |
| 7:81525518-81525518 | upstream_gene_variant           | MODIFIER | 2900076A07Rik | ENSMUSG000000097277 | Transcript        | ENSMUST00000181492 | lincRNA                 | rs230247527 |
| 7:81525518-81525518 | intron variant,non coding trans | MODIFIER | 2900076A07Rik | ENSMUSG000000097277 | Transcript        | ENSMUST00000181903 | lincRNA                 | rs230247527 |
| 7:81525518-81525518 | downstream gene variant         | MODIFIER | Gm37829       | ENSMUSG00000104453  | Transcript        | ENSMUST00000193864 | TEC                     | rs230247527 |
| 7:81525518-81525518 | upstream gene variant           | MODIFIER | Mir1839       | ENSMUSG00000104618  | Transcript        | ENSMUST00000196359 | miRNA                   | rs230247527 |
| 7:81527992-81527992 | upstream_gene_variant           | MODIFIER | Mir1839       | ENSMUSG000000093107 | Transcript        | ENSMUST00000175366 | scaRNA                  | rs32267114  |
| 7:81527992-81527992 | intron_variant,non coding trans | MODIFIER | 2900076A07Rik | ENSMUSG000000097277 | Transcript        | ENSMUST00000180385 | lincRNA                 | rs32267114  |
| 7:81527992-81527992 | upstream_gene_variant           | MODIFIER | 2900076A07Rik | ENSMUSG000000097277 | Transcript        | ENSMUST00000180705 | lincRNA                 | rs32267114  |
| 7:81527992-81527992 | intron variant,non coding trans | MODIFIER | 2900076A07Rik | ENSMUSG000000097277 | Transcript        | ENSMUST00000180879 | lincRNA                 | rs32267114  |
| 7:81527992-81527992 | upstream gene variant           | MODIFIER | 2900076A07Rik | ENSMUSG000000097277 | Transcript        | ENSMUST00000180983 | lincRNA                 | rs32267114  |
| 7:81527992-81527992 | intron variant,non coding trans | MODIFIER | 2900076A07Rik | ENSMUSG000000097277 | Transcript        | ENSMUST00000181164 | lincRNA                 | rs32267114  |
| 7:81527992-81527992 | intron_variant,non coding trans | MODIFIER | 2900076A07Rik | ENSMUSG000000097277 | Transcript        | ENSMUST00000181264 | lincRNA                 | rs32267114  |
| 7:81527992-81527992 | upstream_gene_variant           | MODIFIER | 2900076A07Rik | ENSMUSG000000097277 | Transcript        | ENSMUST00000181492 | lincRNA                 | rs32267114  |
| 7:81527992-81527992 | intron_variant,non coding trans | MODIFIER | 2900076A07Rik | ENSMUSG000000097277 | Transcript        | ENSMUST00000181903 | lincRNA                 | rs32267114  |
| 7:81527992-81527992 | downstream_gene_variant         | MODIFIER | Gm37829       | ENSMUSG00000104453  | Transcript        | ENSMUST00000193864 | TEC                     | rs32267114  |
| 7:81527992-81527992 | upstream gene variant           | MODIFIER | Mir1839       | ENSMUSG00000104618  | Transcript        | ENSMUST00000196359 | miRNA                   | rs32267114  |
| 7:81776376-81776376 | intergenic variant              | MODIFIER | -             | -                   | -                 | -                  | -                       | rs31485795  |
| 7:83892036-83892036 | 5 prime UTR variant             | MODIFIER | Mesd          | ENSMUSG00000038503  | Transcript        | ENSMUST00000094215 | protein_coding          | rs36537392  |
| 7:83892036-83892036 | missense_variant                | MODERATE | Mesd          | ENSMUSG00000038503  | Transcript        | ENSMUST00000130103 | protein_coding          | rs36537392  |
| 7:83892036-83892036 | intron_variant,non coding trans | MODIFIER | Mesd          | ENSMUSG00000038503  | Transcript        | ENSMUST00000138803 | processed_transcript    | rs36537392  |
| 7:83892036-83892036 | upstream_gene_variant           | MODIFIER | Mesd          | ENSMUSG00000038503  | Transcript        | ENSMUST00000153377 | nonsense_mediated_decay | rs36537392  |
| 7:83892036-83892036 | upstream gene variant           | MODIFIER | Mesd          | ENSMUSG00000038503  | Transcript        | ENSMUST00000207373 | retained intron         | rs36537392  |
| 7:83892036-83892036 | upstream gene variant           | MODIFIER | Gm49493       | ENSMUSG00000108878  | Transcript        | ENSMUST00000208403 | TEC                     | rs36537392  |
| 7:83892036-83892036 | regulatory region variant       | MODIFIER | -             | -                   | RegulatoryFeature | ENSMUSR00000246704 | promoter                | rs36537392  |
| 7:88305590-88305590 | intron variant                  | MODIFIER | Ctsc          | ENSMUSG00000030560  | Transcript        | ENSMUST00000032779 | protein_coding          | rs32423389  |
| 7:88305590-88305590 | intron_variant                  | MODIFIER | Ctsc          | ENSMUSG00000030560  | Transcript        | ENSMUST00000128791 | protein_coding          | rs32423389  |
| 7:88305590-88305590 | downstream_gene_variant         | MODIFIER | Ctsc          | ENSMUSG00000030560  | Transcript        | ENSMUST00000152834 | retained_intron         | rs32423389  |
| 7:88309033-88309033 | intron_variant                  | MODIFIER | Ctsc          | ENSMUSG00000030560  | Transcript        | ENSMUST00000032779 | protein_coding          | rs32000003  |

|                     |                                 |          |               |                     |                   |                     |                                |             |
|---------------------|---------------------------------|----------|---------------|---------------------|-------------------|---------------------|--------------------------------|-------------|
| 7:88309033-88309033 | downstream gene variant         | MODIFIER | Ctsc          | ENSMUSG00000030560  | Transcript        | ENSMUST00000128791  | protein coding                 | rs32000003  |
| 7:88309033-88309033 | upstream_gene_variant           | MODIFIER | Gm44751       | ENSMUSG00000109244  | Transcript        | ENSMUST00000208302  | lincRNA                        | rs32000003  |
| 7:88311773-88311773 | downstream_gene_variant         | MODIFIER | Ctsc          | ENSMUSG00000030560  | Transcript        | ENSMUST00000032779  | protein coding                 | -           |
| 7:88311773-88311773 | downstream_gene_variant         | MODIFIER | Ctsc          | ENSMUSG00000030560  | Transcript        | ENSMUST00000128791  | protein coding                 | -           |
| 7:88311773-88311773 | non coding transcript exon var  | MODIFIER | Gm44751       | ENSMUSG00000109244  | Transcript        | ENSMUST00000208302  | lincRNA                        | -           |
| 7:88313804-88313804 | downstream gene variant         | MODIFIER | Ctsc          | ENSMUSG00000030560  | Transcript        | ENSMUST00000032779  | protein coding                 | rs31526453  |
| 7:88313804-88313804 | non coding transcript exon var  | MODIFIER | Gm44751       | ENSMUSG00000109244  | Transcript        | ENSMUST00000208302  | lincRNA                        | rs31526453  |
| 7:88313930-88313930 | downstream_gene_variant         | MODIFIER | Ctsc          | ENSMUSG00000030560  | Transcript        | ENSMUST00000032779  | protein coding                 | rs255045063 |
| 7:88313930-88313930 | non_coding_transcript_exon_var  | MODIFIER | Gm44751       | ENSMUSG00000109244  | Transcript        | ENSMUST00000208302  | lincRNA                        | rs255045063 |
| 7:88313936-88313936 | downstream_gene_variant         | MODIFIER | Ctsc          | ENSMUSG00000030560  | Transcript        | ENSMUST00000032779  | protein coding                 | rs31643413  |
| 7:88313936-88313936 | non coding transcript exon var  | MODIFIER | Gm44751       | ENSMUSG00000109244  | Transcript        | ENSMUST00000208302  | lincRNA                        | rs31643413  |
| 7:89940119-89940119 | intron variant                  | MODIFIER | Hikeshi       | ENSMUSG00000062797  | Transcript        | ENSMUST00000075010  | protein coding                 | rs31729940  |
| 7:89940119-89940119 | intron variant,NMD transcript v | MODIFIER | Hikeshi       | ENSMUSG00000062797  | Transcript        | ENSMUST00000078918  | nonsense mediated decay        | rs31729940  |
| 7:89940119-89940119 | intron variant                  | MODIFIER | Hikeshi       | ENSMUSG00000062797  | Transcript        | ENSMUST00000130609  | protein coding                 | rs31729940  |
| 7:89940119-89940119 | intron_variant                  | MODIFIER | Hikeshi       | ENSMUSG00000062797  | Transcript        | ENSMUST00000153470  | protein coding                 | rs31729940  |
| 7:89940119-89940119 | intron_variant                  | MODIFIER | Hikeshi       | ENSMUSG00000062797  | Transcript        | ENSMUST00000207309  | protein coding                 | rs31729940  |
| 7:89940119-89940119 | non_coding_transcript_exon_var  | MODIFIER | Hikeshi       | ENSMUSG00000062797  | Transcript        | ENSMUST00000207695  | retained_intron                | rs31729940  |
| 7:89940119-89940119 | intron variant,non coding trans | MODIFIER | Hikeshi       | ENSMUSG00000062797  | Transcript        | ENSMUST00000208357  | processed transcript           | rs31729940  |
| 7:89940119-89940119 | regulatory region variant       | MODIFIER | -             | -                   | RegulatoryFeature | ENSMUSR000000247145 | promoter                       | rs31729940  |
| 7:89940121-89940121 | intron variant                  | MODIFIER | Hikeshi       | ENSMUSG00000062797  | Transcript        | ENSMUST00000075010  | protein coding                 | rs31533631  |
| 7:89940121-89940121 | intron_variant,NMD_transcript_v | MODIFIER | Hikeshi       | ENSMUSG00000062797  | Transcript        | ENSMUST00000078918  | nonsense mediated decay        | rs31533631  |
| 7:89940121-89940121 | intron_variant                  | MODIFIER | Hikeshi       | ENSMUSG00000062797  | Transcript        | ENSMUST00000130609  | protein coding                 | rs31533631  |
| 7:89940121-89940121 | intron_variant                  | MODIFIER | Hikeshi       | ENSMUSG00000062797  | Transcript        | ENSMUST00000153470  | protein coding                 | rs31533631  |
| 7:89940121-89940121 | intron_variant                  | MODIFIER | Hikeshi       | ENSMUSG00000062797  | Transcript        | ENSMUST00000207309  | protein coding                 | rs31533631  |
| 7:89940121-89940121 | non coding transcript exon var  | MODIFIER | Hikeshi       | ENSMUSG00000062797  | Transcript        | ENSMUST00000207695  | retained_intron                | rs31533631  |
| 7:89940121-89940121 | intron variant,non coding trans | MODIFIER | Hikeshi       | ENSMUSG00000062797  | Transcript        | ENSMUST00000208357  | processed transcript           | rs31533631  |
| 7:89940121-89940121 | regulatory region variant       | MODIFIER | -             | -                   | RegulatoryFeature | ENSMUSR000000247145 | promoter                       | rs31533631  |
| 7:90040668-90040668 | downstream_gene_variant         | MODIFIER | E230029C05Rik | ENSMUSG00000097585  | Transcript        | ENSMUST00000207458  | antisense                      | rs32173563  |
| 7:90040668-90040668 | intron_variant,non coding trans | MODIFIER | E230029C05Rik | ENSMUSG00000097585  | Transcript        | ENSMUST00000208266  | antisense                      | rs32173563  |
| 7:90040668-90040668 | upstream_gene_variant           | MODIFIER | Gm44861       | ENSMUSG000000108897 | Transcript        | ENSMUST00000208325  | TEC                            | rs32173563  |
| 7:90040668-90040668 | downstream gene variant         | MODIFIER | E230029C05Rik | ENSMUSG00000097585  | Transcript        | ENSMUST00000208362  | antisense                      | rs32173563  |
| 7:90040668-90040668 | intron variant,non coding trans | MODIFIER | E230029C05Rik | ENSMUSG00000097585  | Transcript        | ENSMUST00000208547  | antisense                      | rs32173563  |
| 7:90047503-90047504 | intron variant,non coding trans | MODIFIER | E230029C05Rik | ENSMUSG00000097585  | Transcript        | ENSMUST00000208266  | antisense                      | rs252744467 |
| 7:90047503-90047504 | downstream_gene_variant         | MODIFIER | Gm44861       | ENSMUSG000000108897 | Transcript        | ENSMUST00000208325  | TEC                            | rs252744467 |
| 7:90047503-90047504 | intron_variant,non coding trans | MODIFIER | E230029C05Rik | ENSMUSG00000097585  | Transcript        | ENSMUST00000208547  | antisense                      | rs252744467 |
| 7:90047505-90047505 | intron_variant,non coding trans | MODIFIER | E230029C05Rik | ENSMUSG00000097585  | Transcript        | ENSMUST00000208266  | antisense                      | rs6254275   |
| 7:90047505-90047505 | downstream gene variant         | MODIFIER | Gm44861       | ENSMUSG000000108897 | Transcript        | ENSMUST00000208325  | TEC                            | rs6254275   |
| 7:90047505-90047505 | intron variant,non coding trans | MODIFIER | E230029C05Rik | ENSMUSG00000097585  | Transcript        | ENSMUST00000208547  | antisense                      | rs6254275   |
| 7:90131090-90131090 | intron variant                  | MODIFIER | Picalm        | ENSMUSG00000039361  | Transcript        | ENSMUST00000049537  | protein coding                 | rs31657057  |
| 7:90131090-90131090 | upstream gene variant           | MODIFIER | 2310010J17Rik | ENSMUSG000000097162 | Transcript        | ENSMUST00000181189  | bidirectional promoter lincRNA | rs31657057  |
| 7:90131090-90131090 | upstream_gene_variant           | MODIFIER | Gm45223       | ENSMUSG000000109429 | Transcript        | ENSMUST00000207037  | TEC                            | rs31657057  |
| 7:90131090-90131090 | intron_variant,non coding trans | MODIFIER | Picalm        | ENSMUSG00000039361  | Transcript        | ENSMUST00000207197  | retained_intron                | rs31657057  |
| 7:90131090-90131090 | intron_variant                  | MODIFIER | Picalm        | ENSMUSG00000039361  | Transcript        | ENSMUST00000207225  | protein coding                 | rs31657057  |
| 7:90131090-90131090 | intron variant                  | MODIFIER | Picalm        | ENSMUSG00000039361  | Transcript        | ENSMUST00000207484  | protein coding                 | rs31657057  |
| 7:90131090-90131090 | non coding transcript exon var  | MODIFIER | Picalm        | ENSMUSG00000039361  | Transcript        | ENSMUST00000207596  | retained_intron                | rs31657057  |
| 7:90131090-90131090 | intron variant,non coding trans | MODIFIER | Picalm        | ENSMUSG00000039361  | Transcript        | ENSMUST00000207949  | processed transcript           | rs31657057  |
| 7:90131090-90131090 | upstream_gene_variant           | MODIFIER | Picalm        | ENSMUSG00000039361  | Transcript        | ENSMUST00000208684  | protein coding                 | rs31657057  |
| 7:90131090-90131090 | intron_variant                  | MODIFIER | Picalm        | ENSMUSG00000039361  | Transcript        | ENSMUST00000208730  | protein coding                 | rs31657057  |
| 7:90131090-90131090 | intron_variant                  | MODIFIER | Picalm        | ENSMUSG00000039361  | Transcript        | ENSMUST00000208742  | protein coding                 | rs31657057  |
| 7:90131090-90131090 | intron variant                  | MODIFIER | Picalm        | ENSMUSG00000039361  | Transcript        | ENSMUST00000209068  | protein coding                 | rs31657057  |
| 7:90131090-90131090 | upstream gene variant           | MODIFIER | 2310010J17Rik | ENSMUSG000000097162 | Transcript        | ENSMUST00000209164  | bidirectional promoter lincRNA | rs31657057  |
| 7:90131090-90131090 | upstream gene variant           | MODIFIER | 2310010J17Rik | ENSMUSG00000097162  | Transcript        | ENSMUST00000209166  | bidirectional promoter lincRNA | rs31657057  |
| 7:90131090-90131090 | regulatory region variant       | MODIFIER | -             | -                   | RegulatoryFeature | ENSMUSR000000447023 | promoter                       | rs31657057  |
| 7:90409592-90409592 | non_coding_transcript_exon_var  | MODIFIER | Sytl2         | ENSMUSG00000030616  | Transcript        | ENSMUST00000098310  | processed transcript           | rs31647158  |
| 7:90409592-90409592 | 3_prime_UTR_variant             | MODIFIER | Sytl2         | ENSMUSG00000030616  | Transcript        | ENSMUST00000107210  | protein coding                 | rs31647158  |
| 7:90409592-90409592 | 3_prime_UTR_variant             | MODIFIER | Sytl2         | ENSMUSG00000030616  | Transcript        | ENSMUST00000107211  | protein coding                 | rs31647158  |
| 7:90409592-90409592 | non coding transcript exon var  | MODIFIER | Sytl2         | ENSMUSG00000030616  | Transcript        | ENSMUST00000189194  | retained_intron                | rs31647158  |
| 7:90409592-90409592 | non coding transcript exon var  | MODIFIER | Sytl2         | ENSMUSG00000030616  | Transcript        | ENSMUST00000190365  | processed transcript           | rs31647158  |
| 7:90409592-90409592 | 3 prime UTR variant             | MODIFIER | Sytl2         | ENSMUSG00000030616  | Transcript        | ENSMUST00000190731  | protein coding                 | rs31647158  |
| 7:90409592-90409592 | 3_prime_UTR_variant             | MODIFIER | Sytl2         | ENSMUSG00000030616  | Transcript        | ENSMUST00000190837  | protein coding                 | rs31647158  |
| 7:90409592-90409592 | non_coding_transcript_exon_var  | MODIFIER | Sytl2         | ENSMUSG00000030616  | Transcript        | ENSMUST00000208486  | retained_intron                | rs31647158  |
| 7:90409592-90409592 | non_coding_transcript_exon_var  | MODIFIER | Sytl2         | ENSMUSG00000030616  | Transcript        | ENSMUST00000208580  | retained_intron                | rs31647158  |
| 7:90409592-90409592 | non coding transcript exon var  | MODIFIER | Sytl2         | ENSMUSG00000030616  | Transcript        | ENSMUST00000208809  | retained_intron                | rs31647158  |
| 7:90409592-90409592 | non coding transcript exon var  | MODIFIER | Sytl2         | ENSMUSG00000030616  | Transcript        | ENSMUST00000209188  | retained_intron                | rs31647158  |
| 8:13043993-13043993 | intron variant                  | MODIFIER | F10           | ENSMUSG000000031444 | Transcript        | ENSMUST00000033821  | protein coding                 | -           |
| 8:13043993-13043993 | intron variant                  | MODIFIER | F10           | ENSMUSG000000031444 | Transcript        | ENSMUST00000063820  | protein coding                 | -           |
| 8:13043993-13043993 | intron_variant                  | MODIFIER | F10           | ENSMUSG000000031444 | Transcript        | ENSMUST00000123768  | protein coding                 | -           |
| 8:13043993-13043993 | intron_variant                  | MODIFIER | F10           | ENSMUSG000000031444 | Transcript        | ENSMUST00000128418  | protein coding                 | -           |
| 8:13043993-13043993 | intron_variant                  | MODIFIER | F10           | ENSMUSG000000031444 | Transcript        | ENSMUST00000152034  | protein coding                 | -           |

|                     |                                   |          |         |                    |                   |                    |                          |              |
|---------------------|-----------------------------------|----------|---------|--------------------|-------------------|--------------------|--------------------------|--------------|
| 8:19703115-19703115 | regulatory region variant         | MODIFIER | -       | -                  | RegulatoryFeature | ENSMUSR00000256130 | promoter flanking region | rs265142024  |
| 8:19703115-19703115 | regulatory_region_variant         | MODIFIER | -       | -                  | RegulatoryFeature | ENSMUSR00000452790 | CTCF_binding_site        | rs265142024  |
| 8:19703115-19703115 | intergenic_variant                | MODIFIER | -       | -                  | -                 | -                  | -                        | rs265142024  |
| 8:19703206-19703206 | regulatory_region_variant         | MODIFIER | -       | -                  | RegulatoryFeature | ENSMUSR00000256130 | promoter flanking region | rs50511458   |
| 8:19703206-19703206 | regulatory region variant         | MODIFIER | -       | -                  | RegulatoryFeature | ENSMUSR00000452790 | CTCF binding site        | rs50511458   |
| 8:19703206-19703206 | intergenic variant                | MODIFIER | -       | -                  | -                 | -                  | -                        | rs50511458   |
| 8:19703254-19703254 | regulatory region variant         | MODIFIER | -       | -                  | RegulatoryFeature | ENSMUSR00000256130 | promoter flanking region | rs1134654442 |
| 8:19703254-19703254 | regulatory_region_variant         | MODIFIER | -       | -                  | RegulatoryFeature | ENSMUSR00000452790 | CTCF_binding_site        | rs1134654442 |
| 8:19703254-19703254 | intergenic_variant                | MODIFIER | -       | -                  | -                 | -                  | -                        | rs1134654442 |
| 8:19703435-19703435 | regulatory_region_variant         | MODIFIER | -       | -                  | RegulatoryFeature | ENSMUSR00000256130 | promoter flanking region | rs1133593914 |
| 8:19703435-19703435 | regulatory region variant         | MODIFIER | -       | -                  | RegulatoryFeature | ENSMUSR00000452790 | CTCF binding site        | rs1133593914 |
| 8:19703435-19703435 | intergenic variant                | MODIFIER | -       | -                  | -                 | -                  | -                        | rs1133593914 |
| 8:19703470-19703470 | regulatory region variant         | MODIFIER | -       | -                  | RegulatoryFeature | ENSMUSR00000256130 | promoter flanking region | rs1135368266 |
| 8:19703470-19703470 | regulatory region variant         | MODIFIER | -       | -                  | RegulatoryFeature | ENSMUSR00000452790 | CTCF binding site        | rs1135368266 |
| 8:19703470-19703470 | intergenic_variant                | MODIFIER | -       | -                  | -                 | -                  | -                        | rs1135368266 |
| 8:19706957-19706957 | downstream_gene_variant           | MODIFIER | Gm7760  | ENSMUSG00000110531 | Transcript        | ENSMUST00000212265 | processed_pseudogene     | rs51782372   |
| 8:19706957-19706957 | regulatory_region_variant         | MODIFIER | -       | -                  | RegulatoryFeature | ENSMUSR00000256132 | promoter flanking region | rs51782372   |
| 8:19706957-19706957 | regulatory region variant         | MODIFIER | -       | -                  | RegulatoryFeature | ENSMUSR00000452792 | CTCF binding site        | rs51782372   |
| 8:25814414-25814414 | 3 prime UTR variant               | MODIFIER | Star    | ENSMUSG00000031574 | Transcript        | ENSMUST00000033979 | protein coding           | -            |
| 8:25814414-25814414 | downstream gene variant           | MODIFIER | Ash2l   | ENSMUSG00000031575 | Transcript        | ENSMUST00000068892 | protein coding           | -            |
| 8:25814414-25814414 | downstream_gene_variant           | MODIFIER | Ash2l   | ENSMUSG00000031575 | Transcript        | ENSMUST00000110608 | protein coding           | -            |
| 8:25814414-25814414 | downstream_gene_variant           | MODIFIER | Ash2l   | ENSMUSG00000031575 | Transcript        | ENSMUST00000110609 | protein coding           | -            |
| 8:25814414-25814414 | downstream_gene_variant           | MODIFIER | Ash2l   | ENSMUSG00000031575 | Transcript        | ENSMUST00000110610 | protein coding           | -            |
| 8:25814414-25814414 | downstream gene variant           | MODIFIER | Ash2l   | ENSMUSG00000031575 | Transcript        | ENSMUST00000139946 | nonsense mediated decay  | -            |
| 8:25814414-25814414 | downstream gene variant           | MODIFIER | Ash2l   | ENSMUSG00000031575 | Transcript        | ENSMUST00000151856 | nonsense mediated decay  | -            |
| 8:25814414-25814414 | downstream gene variant           | MODIFIER | Ash2l   | ENSMUSG00000031575 | Transcript        | ENSMUST00000166078 | protein coding           | -            |
| 8:25814414-25814414 | downstream gene variant           | MODIFIER | Star    | ENSMUSG00000031574 | Transcript        | ENSMUST00000210565 | protein coding           | -            |
| 8:25814415-25814415 | 3_prime_UTR_variant               | MODIFIER | Star    | ENSMUSG00000031574 | Transcript        | ENSMUST00000033979 | protein coding           | -            |
| 8:25814415-25814415 | downstream_gene_variant           | MODIFIER | Ash2l   | ENSMUSG00000031575 | Transcript        | ENSMUST00000068892 | protein coding           | -            |
| 8:25814415-25814415 | downstream_gene_variant           | MODIFIER | Ash2l   | ENSMUSG00000031575 | Transcript        | ENSMUST00000110608 | protein coding           | -            |
| 8:25814415-25814415 | downstream gene variant           | MODIFIER | Ash2l   | ENSMUSG00000031575 | Transcript        | ENSMUST00000110609 | protein coding           | -            |
| 8:25814415-25814415 | downstream gene variant           | MODIFIER | Ash2l   | ENSMUSG00000031575 | Transcript        | ENSMUST00000110610 | protein coding           | -            |
| 8:25814415-25814415 | downstream gene variant           | MODIFIER | Ash2l   | ENSMUSG00000031575 | Transcript        | ENSMUST00000139946 | nonsense mediated decay  | -            |
| 8:25814415-25814415 | downstream_gene_variant           | MODIFIER | Ash2l   | ENSMUSG00000031575 | Transcript        | ENSMUST00000151856 | nonsense mediated decay  | -            |
| 8:25814415-25814415 | downstream_gene_variant           | MODIFIER | Ash2l   | ENSMUSG00000031575 | Transcript        | ENSMUST00000166078 | protein coding           | -            |
| 8:25814415-25814415 | downstream_gene_variant           | MODIFIER | Star    | ENSMUSG00000031574 | Transcript        | ENSMUST00000210565 | protein coding           | -            |
| 8:31736728-31736728 | downstream gene variant           | MODIFIER | Gm5117  | ENSMUSG00000093862 | Transcript        | ENSMUST00000178878 | processed_pseudogene     | rs245441837  |
| 8:80993071-80993071 | intron variant                    | MODIFIER | Usp38   | ENSMUSG00000038250 | Transcript        | ENSMUST00000042724 | protein coding           | rs33574826   |
| 8:82765534-82765534 | intron variant                    | MODIFIER | Zfp330  | ENSMUSG00000031711 | Transcript        | ENSMUST00000034147 | protein coding           | rs37868158   |
| 8:82765534-82765534 | intron variant,non coding trans   | MODIFIER | Zfp330  | ENSMUSG00000031711 | Transcript        | ENSMUST00000209587 | retained intron          | rs37868158   |
| 8:82765534-82765534 | intron_variant,non_coding_trans   | MODIFIER | Zfp330  | ENSMUSG00000031711 | Transcript        | ENSMUST00000209601 | processed_transcript     | rs37868158   |
| 8:82765534-82765534 | intron_variant,non_coding_trans   | MODIFIER | Zfp330  | ENSMUSG00000031711 | Transcript        | ENSMUST00000209727 | retained_intron          | rs37868158   |
| 8:82765534-82765534 | non_coding_transcript_exon_var    | MODIFIER | Zfp330  | ENSMUSG00000031711 | Transcript        | ENSMUST00000211451 | retained_intron          | rs37868158   |
| 8:82765534-82765534 | intron variant,NMD transcript v   | MODIFIER | Zfp330  | ENSMUSG00000031711 | Transcript        | ENSMUST00000211462 | nonsense mediated decay  | rs37868158   |
| 8:82766065-82766065 | splice region variant,intron vari | LOW      | Zfp330  | ENSMUSG00000031711 | Transcript        | ENSMUST00000034147 | protein coding           | rs37115436   |
| 8:82766065-82766065 | splice region variant,intron vari | LOW      | Zfp330  | ENSMUSG00000031711 | Transcript        | ENSMUST00000209587 | retained intron          | rs37115436   |
| 8:82766065-82766065 | splice_region_variant,intron_vari | LOW      | Zfp330  | ENSMUSG00000031711 | Transcript        | ENSMUST00000209601 | processed_transcript     | rs37115436   |
| 8:82766065-82766065 | splice_region_variant,intron_vari | LOW      | Zfp330  | ENSMUSG00000031711 | Transcript        | ENSMUST00000209727 | retained_intron          | rs37115436   |
| 8:82766065-82766065 | non_coding_transcript_exon_var    | MODIFIER | Zfp330  | ENSMUSG00000031711 | Transcript        | ENSMUST00000211451 | retained_intron          | rs37115436   |
| 8:82766065-82766065 | splice region variant,intron vari | LOW      | Zfp330  | ENSMUSG00000031711 | Transcript        | ENSMUST00000211462 | nonsense mediated decay  | rs37115436   |
| 8:82771699-82771699 | intron variant                    | MODIFIER | Zfp330  | ENSMUSG00000031711 | Transcript        | ENSMUST00000034147 | protein coding           | rs49793225   |
| 8:82771699-82771699 | upstream gene variant             | MODIFIER | Zfp330  | ENSMUSG00000031711 | Transcript        | ENSMUST00000209587 | retained intron          | rs49793225   |
| 8:82771699-82771699 | upstream gene variant             | MODIFIER | Zfp330  | ENSMUSG00000031711 | Transcript        | ENSMUST00000209601 | processed_transcript     | rs49793225   |
| 8:82771699-82771699 | upstream_gene_variant             | MODIFIER | Zfp330  | ENSMUSG00000031711 | Transcript        | ENSMUST00000209727 | retained_intron          | rs49793225   |
| 8:82771699-82771699 | downstream_gene_variant           | MODIFIER | Zfp330  | ENSMUSG00000031711 | Transcript        | ENSMUST00000210958 | retained_intron          | rs49793225   |
| 8:82771699-82771699 | upstream_gene_variant             | MODIFIER | Zfp330  | ENSMUSG00000031711 | Transcript        | ENSMUST00000211451 | retained_intron          | rs49793225   |
| 8:82771699-82771699 | intron variant,NMD transcript v   | MODIFIER | Zfp330  | ENSMUSG00000031711 | Transcript        | ENSMUST00000211462 | nonsense mediated decay  | rs49793225   |
| 8:83042682-83042682 | synonymous variant                | LOW      | Rnf150  | ENSMUSG00000047747 | Transcript        | ENSMUST00000078525 | protein coding           | rs50554552   |
| 8:83083939-83083939 | 3 prime UTR variant               | MODIFIER | Rnf150  | ENSMUSG00000047747 | Transcript        | ENSMUST00000078525 | protein coding           | rs46981236   |
| 8:83083939-83083939 | non_coding_transcript_exon_var    | MODIFIER | Gm45449 | ENSMUSG00000109876 | Transcript        | ENSMUST00000211485 | antisense                | rs46981236   |
| 8:83084158-83084158 | 3_prime_UTR_variant               | MODIFIER | Rnf150  | ENSMUSG00000047747 | Transcript        | ENSMUST00000078525 | protein coding           | rs32635874   |
| 8:83084158-83084158 | intron_variant,non_coding_trans   | MODIFIER | Gm45449 | ENSMUSG00000109876 | Transcript        | ENSMUST00000211485 | antisense                | rs32635874   |
| 8:83437455-83437455 | intron variant                    | MODIFIER | Scoc    | ENSMUSG00000063253 | Transcript        | ENSMUST00000081506 | protein coding           | rs49403180   |
| 8:83437455-83437455 | intron variant                    | MODIFIER | Scoc    | ENSMUSG00000063253 | Transcript        | ENSMUST00000167525 | protein coding           | rs49403180   |
| 8:83437455-83437455 | intron variant                    | MODIFIER | Scoc    | ENSMUSG00000063253 | Transcript        | ENSMUST00000212031 | protein coding           | rs49403180   |
| 8:83437455-83437455 | intron variant                    | MODIFIER | Scoc    | ENSMUSG00000063253 | Transcript        | ENSMUST00000212449 | protein coding           | rs49403180   |
| 8:83437455-83437455 | intron_variant,non_coding_trans   | MODIFIER | Scoc    | ENSMUSG00000063253 | Transcript        | ENSMUST00000212473 | processed_transcript     | rs49403180   |
| 8:83437455-83437455 | downstream_gene_variant           | MODIFIER | Scoc    | ENSMUSG00000063253 | Transcript        | ENSMUST00000212500 | protein coding           | rs49403180   |
| 8:83437455-83437455 | downstream_gene_variant           | MODIFIER | Scoc    | ENSMUSG00000063253 | Transcript        | ENSMUST00000212849 | retained_intron          | rs49403180   |

clal\_RF

|                     |                                 |          |            |                    |                   |                    |                          |             |
|---------------------|---------------------------------|----------|------------|--------------------|-------------------|--------------------|--------------------------|-------------|
| 8:83437455-83437455 | non coding transcript exon var  | MODIFIER | Scoc       | ENSMUSG00000063253 | Transcript        | ENSMUST00000212871 | retained intron          | rs49403180  |
| 8:83437455-83437455 | intron_variant                  | MODIFIER | Scoc       | ENSMUSG00000063253 | Transcript        | ENSMUST00000212905 | protein_coding           | rs49403180  |
| 8:83437455-83437455 | intron_variant,non_coding_trans | MODIFIER | Scoc       | ENSMUSG00000063253 | Transcript        | ENSMUST00000212947 | retained_intron          | rs49403180  |
| 8:83674087-83674087 | intron_variant                  | MODIFIER | Pkn1       | ENSMUSG00000057672 | Transcript        | ENSMUST00000005616 | protein_coding           | rs32983962  |
| 8:83674087-83674087 | downstream gene variant         | MODIFIER | Ptger1     | ENSMUSG00000019464 | Transcript        | ENSMUST00000019608 | protein_coding           | rs32983962  |
| 8:83674087-83674087 | upstream gene variant           | MODIFIER | Pkn1       | ENSMUSG00000057672 | Transcript        | ENSMUST00000124946 | retained intron          | rs32983962  |
| 8:83674087-83674087 | non coding transcript exon var  | MODIFIER | Pkn1       | ENSMUSG00000057672 | Transcript        | ENSMUST00000128523 | retained intron          | rs32983962  |
| 8:83674087-83674087 | intron_variant,NMD_transcript_v | MODIFIER | Pkn1       | ENSMUSG00000057672 | Transcript        | ENSMUST00000132945 | nonsense_mediated_decay  | rs32983962  |
| 8:83674087-83674087 | downstream_gene_variant         | MODIFIER | Pkn1       | ENSMUSG00000057672 | Transcript        | ENSMUST00000133195 | retained_intron          | rs32983962  |
| 8:83674087-83674087 | upstream_gene_variant           | MODIFIER | Pkn1       | ENSMUSG00000057672 | Transcript        | ENSMUST00000138898 | processed_transcript     | rs32983962  |
| 8:83674087-83674087 | intron variant                  | MODIFIER | Pkn1       | ENSMUSG00000057672 | Transcript        | ENSMUST00000144258 | protein_coding           | rs32983962  |
| 8:83674087-83674087 | intron variant,non_coding_trans | MODIFIER | Pkn1       | ENSMUSG00000057672 | Transcript        | ENSMUST00000146057 | processed transcript     | rs32983962  |
| 8:83674087-83674087 | downstream gene variant         | MODIFIER | Ptger1     | ENSMUSG00000019464 | Transcript        | ENSMUST00000159935 | retained intron          | rs32983962  |
| 8:83674087-83674087 | downstream gene variant         | MODIFIER | Ptger1     | ENSMUSG00000019464 | Transcript        | ENSMUST00000212519 | processed transcript     | rs32983962  |
| 8:83690240-83690240 | intron_variant                  | MODIFIER | Pkn1       | ENSMUSG00000057672 | Transcript        | ENSMUST00000005616 | protein_coding           | rs33540472  |
| 8:83690240-83690240 | intron_variant,NMD_transcript_v | MODIFIER | Pkn1       | ENSMUSG00000057672 | Transcript        | ENSMUST00000132945 | nonsense_mediated_decay  | rs33540472  |
| 8:83690240-83690240 | non_coding_transcript_exon_var  | MODIFIER | Pkn1       | ENSMUSG00000057672 | Transcript        | ENSMUST00000135356 | retained_intron          | rs33540472  |
| 8:83690240-83690240 | intron variant                  | MODIFIER | Pkn1       | ENSMUSG00000057672 | Transcript        | ENSMUST00000144258 | protein_coding           | rs33540472  |
| 8:84092367-84092367 | intron variant                  | MODIFIER | Rfx1       | ENSMUSG00000031706 | Transcript        | ENSMUST00000005600 | protein_coding           | rs50176008  |
| 8:84092367-84092367 | downstream gene variant         | MODIFIER | Dcaf15     | ENSMUSG00000031706 | Transcript        | ENSMUST00000041367 | protein_coding           | rs50176008  |
| 8:84092367-84092367 | downstream_gene_variant         | MODIFIER | Dcaf15     | ENSMUSG00000031706 | Transcript        | ENSMUST00000210279 | protein_coding           | rs50176008  |
| 8:84092367-84092367 | downstream_gene_variant         | MODIFIER | Rfx1       | ENSMUSG00000031706 | Transcript        | ENSMUST00000210660 | retained_intron          | rs50176008  |
| 8:84092367-84092367 | intron_variant                  | MODIFIER | Rfx1       | ENSMUSG00000031706 | Transcript        | ENSMUST00000211046 | protein_coding           | rs50176008  |
| 8:84092473-84092473 | intron variant                  | MODIFIER | Rfx1       | ENSMUSG00000031706 | Transcript        | ENSMUST00000005600 | protein_coding           | rs50320591  |
| 8:84092473-84092473 | downstream gene variant         | MODIFIER | Dcaf15     | ENSMUSG00000031706 | Transcript        | ENSMUST00000041367 | protein_coding           | rs50320591  |
| 8:84092473-84092473 | downstream gene variant         | MODIFIER | Dcaf15     | ENSMUSG00000031706 | Transcript        | ENSMUST00000210279 | protein_coding           | rs50320591  |
| 8:84092473-84092473 | downstream gene variant         | MODIFIER | Rfx1       | ENSMUSG00000031706 | Transcript        | ENSMUST00000210660 | retained intron          | rs50320591  |
| 8:84092473-84092473 | intron_variant                  | MODIFIER | Rfx1       | ENSMUSG00000031706 | Transcript        | ENSMUST00000211046 | protein_coding           | rs50320591  |
| 8:84097026-84097026 | downstream_gene_variant         | MODIFIER | Rfx1       | ENSMUSG00000031706 | Transcript        | ENSMUST00000005600 | protein_coding           | rs48419810  |
| 8:84097026-84097026 | downstream_gene_variant         | MODIFIER | Dcaf15     | ENSMUSG00000031706 | Transcript        | ENSMUST00000041367 | protein_coding           | rs48419810  |
| 8:84097026-84097026 | downstream gene variant         | MODIFIER | Dcaf15     | ENSMUSG00000031706 | Transcript        | ENSMUST00000210279 | protein_coding           | rs48419810  |
| 8:84097026-84097026 | downstream gene variant         | MODIFIER | Rfx1       | ENSMUSG00000031706 | Transcript        | ENSMUST00000211046 | protein_coding           | rs48419810  |
| 8:84130633-84130633 | downstream gene variant         | MODIFIER | Cc2d1a     | ENSMUSG00000036686 | Transcript        | ENSMUST00000040383 | protein_coding           | rs33475878  |
| 8:84130633-84130633 | synonymous_variant              | LOW      | Podnl1     | ENSMUSG00000012889 | Transcript        | ENSMUST00000093380 | protein_coding           | rs33475878  |
| 8:84130633-84130633 | downstream_gene_variant         | MODIFIER | Cc2d1a     | ENSMUSG00000036686 | Transcript        | ENSMUST00000117424 | protein_coding           | rs33475878  |
| 8:84130633-84130633 | non_coding_transcript_exon_var  | MODIFIER | Podnl1     | ENSMUSG00000012889 | Transcript        | ENSMUST00000147175 | retained_intron          | rs33475878  |
| 8:84130633-84130633 | downstream gene variant         | MODIFIER | Cc2d1a     | ENSMUSG00000036686 | Transcript        | ENSMUST00000154029 | retained intron          | rs33475878  |
| 8:84130633-84130633 | regulatory region variant       | MODIFIER | -          | -                  | RegulatoryFeature | ENSMUSR00000735601 | promoter flanking region | rs33475878  |
| 8:84130645-84130645 | downstream gene variant         | MODIFIER | Cc2d1a     | ENSMUSG00000036686 | Transcript        | ENSMUST00000040383 | protein_coding           | rs33045917  |
| 8:84130645-84130645 | synonymous_variant              | LOW      | Podnl1     | ENSMUSG00000012889 | Transcript        | ENSMUST00000093380 | protein_coding           | rs33045917  |
| 8:84130645-84130645 | downstream_gene_variant         | MODIFIER | Cc2d1a     | ENSMUSG00000036686 | Transcript        | ENSMUST00000117424 | protein_coding           | rs33045917  |
| 8:84130645-84130645 | non_coding_transcript_exon_var  | MODIFIER | Podnl1     | ENSMUSG00000012889 | Transcript        | ENSMUST00000147175 | retained_intron          | rs33045917  |
| 8:84130645-84130645 | downstream_gene_variant         | MODIFIER | Cc2d1a     | ENSMUSG00000036686 | Transcript        | ENSMUST00000154029 | retained intron          | rs33045917  |
| 8:84130645-84130645 | regulatory region variant       | MODIFIER | -          | -                  | RegulatoryFeature | ENSMUSR00000735601 | promoter flanking region | rs33045917  |
| 8:84132272-84132272 | downstream gene variant         | MODIFIER | Cc2d1a     | ENSMUSG00000036686 | Transcript        | ENSMUST00000040383 | protein_coding           | rs51761684  |
| 8:84132272-84132272 | 3 prime UTR variant             | MODIFIER | Podnl1     | ENSMUSG00000012889 | Transcript        | ENSMUST00000093380 | protein_coding           | rs51761684  |
| 8:84132272-84132272 | downstream_gene_variant         | MODIFIER | Cc2d1a     | ENSMUSG00000036686 | Transcript        | ENSMUST00000117424 | protein_coding           | rs51761684  |
| 8:84132272-84132272 | non_coding_transcript_exon_var  | MODIFIER | Podnl1     | ENSMUSG00000012889 | Transcript        | ENSMUST00000147175 | retained_intron          | rs51761684  |
| 8:84132272-84132272 | downstream_gene_variant         | MODIFIER | Cc2d1a     | ENSMUSG00000036686 | Transcript        | ENSMUST00000154029 | retained_intron          | rs51761684  |
| 8:84209682-84209682 | downstream gene variant         | MODIFIER | Zswim4     | ENSMUSG00000035671 | Transcript        | ENSMUST00000039480 | protein_coding           | rs253385939 |
| 8:84209682-84209682 | downstream gene variant         | MODIFIER | Mir27a     | ENSMUSG00000065444 | Transcript        | ENSMUST00000083510 | miRNA                    | rs253385939 |
| 8:84209682-84209682 | downstream gene variant         | MODIFIER | Mir24-2    | ENSMUSG00000065541 | Transcript        | ENSMUST00000083607 | miRNA                    | rs253385939 |
| 8:84209682-84209682 | downstream gene variant         | MODIFIER | Mir23a     | ENSMUSG00000065611 | Transcript        | ENSMUST00000083677 | miRNA                    | rs253385939 |
| 8:84209682-84209682 | downstream_gene_variant         | MODIFIER | Gm26532    | ENSMUSG00000097296 | Transcript        | ENSMUST00000180630 | lincRNA                  | rs253385939 |
| 8:84209682-84209682 | upstream_gene_variant           | MODIFIER | Mir3074-2  | ENSMUSG00000105458 | Transcript        | ENSMUST00000199621 | miRNA                    | rs253385939 |
| 8:84246365-84246365 | 3_prime_UTR_variant             | MODIFIER | D8Ertd738e | ENSMUSG00000019362 | Transcript        | ENSMUST00000019506 | protein_coding           | rs13459774  |
| 8:84246365-84246365 | downstream gene variant         | MODIFIER | Mir1       | ENSMUSG00000004996 | Transcript        | ENSMUST00000125498 | protein_coding           | rs13459774  |
| 8:84246365-84246365 | downstream gene variant         | MODIFIER | Mir1       | ENSMUSG00000004996 | Transcript        | ENSMUST00000126435 | protein_coding           | rs13459774  |
| 8:84252728-84252728 | downstream gene variant         | MODIFIER | Mir1       | ENSMUSG00000004996 | Transcript        | ENSMUST00000005122 | nonsense mediated decay  | rs232814241 |
| 8:84252728-84252728 | upstream_gene_variant           | MODIFIER | D8Ertd738e | ENSMUSG00000019362 | Transcript        | ENSMUST00000019506 | protein_coding           | rs232814241 |
| 8:84252728-84252728 | intron_variant                  | MODIFIER | Mir1       | ENSMUSG00000004996 | Transcript        | ENSMUST00000125498 | protein_coding           | rs232814241 |
| 8:84252728-84252728 | intron_variant                  | MODIFIER | Mir1       | ENSMUSG00000004996 | Transcript        | ENSMUST00000126435 | protein_coding           | rs232814241 |
| 8:84252728-84252728 | downstream gene variant         | MODIFIER | Mir1       | ENSMUSG00000004996 | Transcript        | ENSMUST00000127747 | retained intron          | rs232814241 |
| 8:84252728-84252728 | downstream gene variant         | MODIFIER | Mir1       | ENSMUSG00000004996 | Transcript        | ENSMUST00000140850 | processed transcript     | rs232814241 |
| 8:84253561-84253561 | downstream gene variant         | MODIFIER | Ccdc130    | ENSMUSG00000005122 | Transcript        | ENSMUST00000005122 | protein_coding           | rs47671269  |
| 8:84253561-84253561 | downstream gene variant         | MODIFIER | Mir1       | ENSMUSG00000004996 | Transcript        | ENSMUST00000005122 | nonsense mediated decay  | rs47671269  |
| 8:84253561-84253561 | upstream_gene_variant           | MODIFIER | D8Ertd738e | ENSMUSG00000019362 | Transcript        | ENSMUST00000019506 | protein_coding           | rs47671269  |
| 8:84253561-84253561 | downstream_gene_variant         | MODIFIER | Ccdc130    | ENSMUSG00000004994 | Transcript        | ENSMUST00000098578 | protein_coding           | rs47671269  |
| 8:84253561-84253561 | intron_variant                  | MODIFIER | Mir1       | ENSMUSG00000004996 | Transcript        | ENSMUST00000125498 | protein_coding           | rs47671269  |





|                     |                                 |          |               |                    |                   |                     |                         |            |
|---------------------|---------------------------------|----------|---------------|--------------------|-------------------|---------------------|-------------------------|------------|
| 8:84698861-84698861 | downstream gene variant         | MODIFIER | Trmt1         | ENSMUSG00000001909 | Transcript        | ENSMUST00000128022  | processed transcript    | rs32923228 |
| 8:84698861-84698861 | downstream_gene_variant         | MODIFIER | Trmt1         | ENSMUSG00000001909 | Transcript        | ENSMUST00000131700  | nonsense mediated_decay | rs32923228 |
| 8:84698861-84698861 | intron_variant                  | MODIFIER | Trmt1         | ENSMUSG00000001909 | Transcript        | ENSMUST00000136423  | protein_coding          | rs32923228 |
| 8:84698861-84698861 | intron_variant,non_coding_trans | MODIFIER | Trmt1         | ENSMUSG00000001909 | Transcript        | ENSMUST00000137953  | retained_intron         | rs32923228 |
| 8:84698861-84698861 | downstream gene variant         | MODIFIER | Trmt1         | ENSMUSG00000001909 | Transcript        | ENSMUST00000138300  | retained intron         | rs32923228 |
| 8:84698861-84698861 | downstream gene variant         | MODIFIER | Trmt1         | ENSMUSG00000001909 | Transcript        | ENSMUST00000143427  | nonsense mediated decay | rs32923228 |
| 8:84698861-84698861 | downstream gene variant         | MODIFIER | Trmt1         | ENSMUSG00000001909 | Transcript        | ENSMUST00000148118  | retained intron         | rs32923228 |
| 8:84698861-84698861 | downstream_gene_variant         | MODIFIER | Nfix          | ENSMUSG00000001911 | Transcript        | ENSMUST00000148644  | processed transcript    | rs32923228 |
| 8:84698861-84698861 | downstream_gene_variant         | MODIFIER | Trmt1         | ENSMUSG00000001909 | Transcript        | ENSMUST00000152301  | protein_coding          | rs32923228 |
| 8:84698861-84698861 | downstream_gene_variant         | MODIFIER | Trmt1         | ENSMUSG00000001909 | Transcript        | ENSMUST00000175704  | retained_intron         | rs32923228 |
| 8:84698861-84698861 | upstream gene variant           | MODIFIER | Trmt1         | ENSMUSG00000001909 | Transcript        | ENSMUST00000175767  | retained intron         | rs32923228 |
| 8:84698861-84698861 | downstream gene variant         | MODIFIER | Trmt1         | ENSMUSG00000001909 | Transcript        | ENSMUST00000175784  | protein_coding          | rs32923228 |
| 8:84698861-84698861 | downstream gene variant         | MODIFIER | Trmt1         | ENSMUSG00000001909 | Transcript        | ENSMUST00000175884  | nonsense mediated decay | rs32923228 |
| 8:84698861-84698861 | downstream gene variant         | MODIFIER | Trmt1         | ENSMUSG00000001909 | Transcript        | ENSMUST00000177084  | protein_coding          | rs32923228 |
| 8:84698861-84698861 | upstream_gene_variant           | MODIFIER | Trmt1         | ENSMUSG00000001909 | Transcript        | ENSMUST00000177260  | retained_intron         | rs32923228 |
| 8:84698861-84698861 | downstream_gene_variant         | MODIFIER | Trmt1         | ENSMUSG00000001909 | Transcript        | ENSMUST00000177286  | processed transcript    | rs32923228 |
| 8:84698861-84698861 | downstream_gene_variant         | MODIFIER | Trmt1         | ENSMUSG00000001909 | Transcript        | ENSMUST00000177423  | protein_coding          | rs32923228 |
| 8:84724951-84724951 | intron variant                  | MODIFIER | Nfix          | ENSMUSG00000001911 | Transcript        | ENSMUST00000076715  | protein_coding          | rs33450101 |
| 8:84724951-84724951 | intron variant                  | MODIFIER | G430095P16Rik | ENSMUSG00000074203 | Transcript        | ENSMUST00000098571  | protein_coding          | rs33450101 |
| 8:84724951-84724951 | intron variant                  | MODIFIER | Nfix          | ENSMUSG00000001911 | Transcript        | ENSMUST00000099070  | protein_coding          | rs33450101 |
| 8:84724951-84724951 | intron_variant                  | MODIFIER | Nfix          | ENSMUSG00000001911 | Transcript        | ENSMUST00000109762  | protein_coding          | rs33450101 |
| 8:84724951-84724951 | intron_variant                  | MODIFIER | Nfix          | ENSMUSG00000001911 | Transcript        | ENSMUST00000109764  | protein_coding          | rs33450101 |
| 8:84724951-84724951 | intron_variant                  | MODIFIER | Nfix          | ENSMUSG00000001911 | Transcript        | ENSMUST00000126806  | protein_coding          | rs33450101 |
| 8:84724951-84724951 | regulatory region variant       | MODIFIER | -             | -                  | RegulatoryFeature | ENSMUSR00000735712  | promoter                | rs33450101 |
| 8:84725920-84725920 | intron variant                  | MODIFIER | Nfix          | ENSMUSG00000001911 | Transcript        | ENSMUST00000076715  | protein_coding          | rs32765689 |
| 8:84725920-84725920 | intron variant                  | MODIFIER | G430095P16Rik | ENSMUSG00000074203 | Transcript        | ENSMUST00000098571  | protein_coding          | rs32765689 |
| 8:84725920-84725920 | intron variant                  | MODIFIER | Nfix          | ENSMUSG00000001911 | Transcript        | ENSMUST00000099070  | protein_coding          | rs32765689 |
| 8:84725920-84725920 | intron variant                  | MODIFIER | Nfix          | ENSMUSG00000001911 | Transcript        | ENSMUST00000109762  | protein_coding          | rs32765689 |
| 8:84725920-84725920 | intron_variant                  | MODIFIER | Nfix          | ENSMUSG00000001911 | Transcript        | ENSMUST00000109764  | protein_coding          | rs32765689 |
| 8:84725920-84725920 | intron_variant                  | MODIFIER | Nfix          | ENSMUSG00000001911 | Transcript        | ENSMUST00000126806  | protein_coding          | rs32765689 |
| 8:84725920-84725920 | regulatory region variant       | MODIFIER | -             | -                  | RegulatoryFeature | ENSMUSR00000735712  | promoter                | rs32765689 |
| 8:84725920-84725920 | regulatory region variant       | MODIFIER | -             | -                  | RegulatoryFeature | ENSMUSR00000735715  | CTCF binding site       | rs32765689 |
| 8:84726317-84726317 | intron variant                  | MODIFIER | Nfix          | ENSMUSG00000001911 | Transcript        | ENSMUST00000076715  | protein_coding          | rs32539411 |
| 8:84726317-84726317 | intron_variant                  | MODIFIER | G430095P16Rik | ENSMUSG00000074203 | Transcript        | ENSMUST00000098571  | protein_coding          | rs32539411 |
| 8:84726317-84726317 | intron variant                  | MODIFIER | Nfix          | ENSMUSG00000001911 | Transcript        | ENSMUST00000099070  | protein_coding          | rs32539411 |
| 8:84726317-84726317 | intron_variant                  | MODIFIER | Nfix          | ENSMUSG00000001911 | Transcript        | ENSMUST00000109762  | protein_coding          | rs32539411 |
| 8:84726317-84726317 | intron variant                  | MODIFIER | Nfix          | ENSMUSG00000001911 | Transcript        | ENSMUST00000109764  | protein_coding          | rs32539411 |
| 8:84726317-84726317 | intron variant                  | MODIFIER | Nfix          | ENSMUSG00000001911 | Transcript        | ENSMUST00000126806  | protein_coding          | rs32539411 |
| 8:84726317-84726317 | regulatory region variant       | MODIFIER | -             | -                  | RegulatoryFeature | ENSMUSR00000735715  | CTCF binding site       | rs32539411 |
| 8:84861268-84861268 | intron variant                  | MODIFIER | Farsa         | ENSMUSG00000003808 | Transcript        | ENSMUST00000003906  | protein_coding          | rs33315097 |
| 8:84861268-84861268 | intron_variant                  | MODIFIER | Farsa         | ENSMUSG00000003808 | Transcript        | ENSMUST00000109754  | protein_coding          | rs33315097 |
| 8:84861268-84861268 | intron_variant,non_coding_trans | MODIFIER | Farsa         | ENSMUSG00000003808 | Transcript        | ENSMUST00000129595  | retained_intron         | rs33315097 |
| 8:84861268-84861268 | intron_variant,non_coding_trans | MODIFIER | Farsa         | ENSMUSG00000003808 | Transcript        | ENSMUST00000144404  | retained_intron         | rs33315097 |
| 8:84861268-84861268 | intron variant,NMD transcript v | MODIFIER | Farsa         | ENSMUSG00000003808 | Transcript        | ENSMUST00000156970  | nonsense mediated decay | rs33315097 |
| 8:84864676-84864676 | intron variant                  | MODIFIER | Farsa         | ENSMUSG00000003808 | Transcript        | ENSMUST00000003906  | protein_coding          | rs33236304 |
| 8:84864676-84864676 | intron variant                  | MODIFIER | Farsa         | ENSMUSG00000003808 | Transcript        | ENSMUST00000109754  | protein_coding          | rs33236304 |
| 8:84864676-84864676 | intron_variant,non_coding_trans | MODIFIER | Farsa         | ENSMUSG00000003808 | Transcript        | ENSMUST00000129595  | retained_intron         | rs33236304 |
| 8:84864676-84864676 | upstream_gene_variant           | MODIFIER | Farsa         | ENSMUSG00000003808 | Transcript        | ENSMUST00000141480  | retained_intron         | rs33236304 |
| 8:84864676-84864676 | non_coding_transcript_exon_var  | MODIFIER | Farsa         | ENSMUSG00000003808 | Transcript        | ENSMUST00000144404  | retained_intron         | rs33236304 |
| 8:84864676-84864676 | intron variant,NMD transcript v | MODIFIER | Farsa         | ENSMUSG00000003808 | Transcript        | ENSMUST00000156970  | nonsense mediated decay | rs33236304 |
| 8:84864676-84864676 | upstream gene variant           | MODIFIER | Mir7069       | ENSMUSG00000098331 | Transcript        | ENSMUST00000184765  | miRNA                   | rs33236304 |
| 8:84887651-84887651 | intron variant                  | MODIFIER | Gcdh          | ENSMUSG00000003809 | Transcript        | ENSMUST00000003907  | protein_coding          | rs51308166 |
| 8:84887651-84887651 | downstream gene variant         | MODIFIER | Syce2         | ENSMUSG00000003824 | Transcript        | ENSMUST00000003922  | nonsense mediated decay | rs51308166 |
| 8:84887651-84887651 | intron variant                  | MODIFIER | Gcdh          | ENSMUSG00000003809 | Transcript        | ENSMUST00000109745  | protein_coding          | rs51308166 |
| 8:84887651-84887651 | downstream_gene_variant         | MODIFIER | Gcdh          | ENSMUSG00000003809 | Transcript        | ENSMUST00000128023  | retained_intron         | rs51308166 |
| 8:84887651-84887651 | 3_prime_UTR_variant             | MODIFIER | Syce2         | ENSMUSG00000003824 | Transcript        | ENSMUST00000136026  | protein_coding          | rs51308166 |
| 8:84887651-84887651 | downstream gene variant         | MODIFIER | Gcdh          | ENSMUSG00000003809 | Transcript        | ENSMUST00000136462  | retained intron         | rs51308166 |
| 8:84887651-84887651 | downstream gene variant         | MODIFIER | Gcdh          | ENSMUSG00000003809 | Transcript        | ENSMUST00000139180  | retained intron         | rs51308166 |
| 8:84887651-84887651 | downstream gene variant         | MODIFIER | Syce2         | ENSMUSG00000003824 | Transcript        | ENSMUST00000144466  | retained intron         | rs51308166 |
| 8:84887651-84887651 | downstream_gene_variant         | MODIFIER | Syce2         | ENSMUSG00000003824 | Transcript        | ENSMUST00000170296  | protein_coding          | rs51308166 |
| 8:84997169-84997169 | synonymous variant              | LOW      | Hook2         | ENSMUSG00000052566 | Transcript        | ENSMUST00000064495  | protein_coding          | rs50198640 |
| 8:84997169-84997169 | upstream_gene_variant           | MODIFIER | Hook2         | ENSMUSG00000052566 | Transcript        | ENSMUST00000209652  | processed transcript    | rs50198640 |
| 8:84997169-84997169 | synonymous variant              | LOW      | Hook2         | ENSMUSG00000052566 | Transcript        | ENSMUST00000209764  | protein_coding          | rs50198640 |
| 8:84997169-84997169 | synonymous variant              | LOW      | Hook2         | ENSMUSG00000052566 | Transcript        | ENSMUST00000210326  | protein_coding          | rs50198640 |
| 8:85020883-85020883 | intron variant                  | MODIFIER | Asna1         | ENSMUSG00000052456 | Transcript        | ENSMUST00000064314  | protein_coding          | rs46505680 |
| 8:85020883-85020883 | intron variant,NMD transcript v | MODIFIER | Asna1         | ENSMUSG00000052456 | Transcript        | ENSMUST00000209834  | nonsense mediated decay | rs46505680 |
| 8:85020883-85020883 | downstream_gene_variant         | MODIFIER | Asna1         | ENSMUSG00000052456 | Transcript        | ENSMUST000000211221 | retained_intron         | rs46505680 |
| 8:85020883-85020883 | intron_variant,non_coding_trans | MODIFIER | Asna1         | ENSMUSG00000052456 | Transcript        | ENSMUST00000211702  | processed transcript    | rs46505680 |
| 8:85024997-85024997 | upstream_gene_variant           | MODIFIER | Trir          | ENSMUSG00000041203 | Transcript        | ENSMUST00000047281  | protein_coding          | rs48781676 |







|                     |                                 |          |         |                    |                   |                     |                         |             |
|---------------------|---------------------------------|----------|---------|--------------------|-------------------|---------------------|-------------------------|-------------|
| 8:85076316-85076316 | regulatory region variant       | MODIFIER | -       | -                  | RegulatoryFeature | ENSMUSR00000456760  | CTCF binding site       | rs253086696 |
| 8:85076316-85076316 | regulatory_region_variant       | MODIFIER | -       | -                  | RegulatoryFeature | ENSMUSR00000735784  | TF_binding_site         | rs253086696 |
| 8:85078582-85078582 | upstream_gene_variant           | MODIFIER | Man2b1  | ENSMUSG00000005142 | Transcript        | ENSMUST00000034121  | protein_coding          | rs47634958  |
| 8:85078582-85078582 | downstream_gene_variant         | MODIFIER | Dhps    | ENSMUSG00000060038 | Transcript        | ENSMUST00000078665  | protein_coding          | rs47634958  |
| 8:85078582-85078582 | upstream gene variant           | MODIFIER | Wdr83os | ENSMUSG00000059355 | Transcript        | ENSMUST00000079764  | protein_coding          | rs47634958  |
| 8:85078582-85078582 | intron variant                  | MODIFIER | Wdr83   | ENSMUSG00000005150 | Transcript        | ENSMUST000000093357 | protein_coding          | rs47634958  |
| 8:85078582-85078582 | intron variant,non coding trans | MODIFIER | Wdr83   | ENSMUSG00000005150 | Transcript        | ENSMUST00000131909  | retained intron         | rs47634958  |
| 8:85078582-85078582 | downstream_gene_variant         | MODIFIER | Dhps    | ENSMUSG00000060038 | Transcript        | ENSMUST00000132356  | retained_intron         | rs47634958  |
| 8:85078582-85078582 | downstream_gene_variant         | MODIFIER | Dhps    | ENSMUSG00000060038 | Transcript        | ENSMUST00000132766  | retained_intron         | rs47634958  |
| 8:85078582-85078582 | downstream_gene_variant         | MODIFIER | Wdr83   | ENSMUSG00000005150 | Transcript        | ENSMUST00000135463  | retained_intron         | rs47634958  |
| 8:85078582-85078582 | intron variant,non coding trans | MODIFIER | Wdr83   | ENSMUSG00000005150 | Transcript        | ENSMUST00000136696  | retained intron         | rs47634958  |
| 8:85078582-85078582 | upstream gene variant           | MODIFIER | Wdr83os | ENSMUSG00000059355 | Transcript        | ENSMUST00000140621  | protein_coding          | rs47634958  |
| 8:85078582-85078582 | upstream gene variant           | MODIFIER | Wdr83   | ENSMUSG00000005150 | Transcript        | ENSMUST00000142201  | protein_coding          | rs47634958  |
| 8:85078582-85078582 | downstream gene variant         | MODIFIER | Dhps    | ENSMUSG00000060038 | Transcript        | ENSMUST00000142422  | retained intron         | rs47634958  |
| 8:85078582-85078582 | intron_variant,non_coding_trans | MODIFIER | Wdr83   | ENSMUSG00000005150 | Transcript        | ENSMUST00000145880  | retained_intron         | rs47634958  |
| 8:85078582-85078582 | upstream_gene_variant           | MODIFIER | Wdr83   | ENSMUSG00000005150 | Transcript        | ENSMUST00000146900  | retained_intron         | rs47634958  |
| 8:85078582-85078582 | upstream_gene_variant           | MODIFIER | Wdr83os | ENSMUSG00000059355 | Transcript        | ENSMUST00000148592  | retained_intron         | rs47634958  |
| 8:85078582-85078582 | intron variant,NMD transcript v | MODIFIER | Wdr83   | ENSMUSG00000005150 | Transcript        | ENSMUST00000149050  | nonsense mediated decay | rs47634958  |
| 8:85078582-85078582 | intron variant,non coding trans | MODIFIER | Wdr83   | ENSMUSG00000005150 | Transcript        | ENSMUST00000152186  | retained intron         | rs47634958  |
| 8:85078582-85078582 | intron variant                  | MODIFIER | Wdr83   | ENSMUSG00000005150 | Transcript        | ENSMUST00000152785  | protein_coding          | rs47634958  |
| 8:85078582-85078582 | downstream_gene_variant         | MODIFIER | Dhps    | ENSMUSG00000060038 | Transcript        | ENSMUST00000152871  | nonsense_mediated_decay | rs47634958  |
| 8:85078582-85078582 | downstream_gene_variant         | MODIFIER | Dhps    | ENSMUSG00000060038 | Transcript        | ENSMUST00000154575  | retained_intron         | rs47634958  |
| 8:85078582-85078582 | upstream_gene_variant           | MODIFIER | Man2b1  | ENSMUSG00000005142 | Transcript        | ENSMUST00000209264  | nonsense_mediated_decay | rs47634958  |
| 8:85078582-85078582 | upstream gene variant           | MODIFIER | Man2b1  | ENSMUSG00000005142 | Transcript        | ENSMUST00000209361  | nonsense mediated decay | rs47634958  |
| 8:85078582-85078582 | upstream gene variant           | MODIFIER | Man2b1  | ENSMUSG00000005142 | Transcript        | ENSMUST00000210991  | retained intron         | rs47634958  |
| 8:85086501-85086501 | intron variant                  | MODIFIER | Man2b1  | ENSMUSG00000005142 | Transcript        | ENSMUST000000034121 | protein_coding          | rs33475081  |
| 8:85086501-85086501 | downstream gene variant         | MODIFIER | Wdr83os | ENSMUSG00000059355 | Transcript        | ENSMUST00000079764  | protein_coding          | rs33475081  |
| 8:85086501-85086501 | downstream_gene_variant         | MODIFIER | Wdr83os | ENSMUSG00000059355 | Transcript        | ENSMUST00000140621  | protein_coding          | rs33475081  |
| 8:85086501-85086501 | downstream_gene_variant         | MODIFIER | Wdr83os | ENSMUSG00000059355 | Transcript        | ENSMUST00000148592  | retained_intron         | rs33475081  |
| 8:85086501-85086501 | downstream_gene_variant         | MODIFIER | Man2b1  | ENSMUSG00000005142 | Transcript        | ENSMUST00000209264  | nonsense_mediated_decay | rs33475081  |
| 8:85086501-85086501 | intron variant,NMD transcript v | MODIFIER | Man2b1  | ENSMUSG00000005142 | Transcript        | ENSMUST00000209361  | nonsense mediated decay | rs33475081  |
| 8:85086501-85086501 | downstream gene variant         | MODIFIER | Man2b1  | ENSMUSG00000005142 | Transcript        | ENSMUST00000210991  | retained intron         | rs33475081  |
| 8:85086501-85086501 | non coding transcript exon var  | MODIFIER | Man2b1  | ENSMUSG00000005142 | Transcript        | ENSMUST00000211223  | retained intron         | rs33475081  |
| 8:85086501-85086501 | non_coding_transcript_exon_var  | MODIFIER | Man2b1  | ENSMUSG00000005142 | Transcript        | ENSMUST00000211379  | retained_intron         | rs33475081  |
| 8:85086501-85086501 | regulatory_region_variant       | MODIFIER | -       | -                  | RegulatoryFeature | ENSMUSR00000456763  | CTCF_binding_site       | rs33475081  |
| 8:85087476-85087476 | intron_variant                  | MODIFIER | Man2b1  | ENSMUSG00000005142 | Transcript        | ENSMUST00000034121  | protein_coding          | rs33242493  |
| 8:85087476-85087476 | downstream gene variant         | MODIFIER | Man2b1  | ENSMUSG00000005142 | Transcript        | ENSMUST00000209264  | nonsense mediated decay | rs33242493  |
| 8:85087476-85087476 | downstream gene variant         | MODIFIER | Man2b1  | ENSMUSG00000005142 | Transcript        | ENSMUST00000209361  | nonsense mediated decay | rs33242493  |
| 8:85087476-85087476 | downstream gene variant         | MODIFIER | Man2b1  | ENSMUSG00000005142 | Transcript        | ENSMUST00000210991  | retained intron         | rs33242493  |
| 8:85087476-85087476 | intron variant,non coding trans | MODIFIER | Man2b1  | ENSMUSG00000005142 | Transcript        | ENSMUST00000211223  | retained intron         | rs33242493  |
| 8:85087476-85087476 | intron_variant,non_coding_trans | MODIFIER | Man2b1  | ENSMUSG00000005142 | Transcript        | ENSMUST00000211379  | retained_intron         | rs33242493  |
| 8:85091632-85091632 | intron variant                  | MODIFIER | Man2b1  | ENSMUSG00000005142 | Transcript        | ENSMUST00000034121  | protein_coding          | rs32725145  |
| 8:85091632-85091632 | downstream_gene_variant         | MODIFIER | Man2b1  | ENSMUSG00000005142 | Transcript        | ENSMUST00000209361  | nonsense_mediated_decay | rs32725145  |
| 8:85091632-85091632 | downstream gene variant         | MODIFIER | Man2b1  | ENSMUSG00000005142 | Transcript        | ENSMUST00000211223  | retained intron         | rs32725145  |
| 8:85091632-85091632 | downstream gene variant         | MODIFIER | Man2b1  | ENSMUSG00000005142 | Transcript        | ENSMUST00000211379  | retained intron         | rs32725145  |
| 8:85094652-85094658 | intron variant                  | MODIFIER | Man2b1  | ENSMUSG00000005142 | Transcript        | ENSMUST00000034121  | protein_coding          | rs247191075 |
| 8:85094652-85094658 | downstream_gene_variant         | MODIFIER | Man2b1  | ENSMUSG00000005142 | Transcript        | ENSMUST00000211379  | retained_intron         | rs247191075 |
| 8:85303054-85303054 | upstream_gene_variant           | MODIFIER | Vps35   | ENSMUSG00000031696 | Transcript        | ENSMUST00000034131  | protein_coding          | rs32998051  |
| 8:85303054-85303054 | intron_variant                  | MODIFIER | Orc6    | ENSMUSG00000031697 | Transcript        | ENSMUST00000034132  | protein_coding          | rs32998051  |
| 8:85303054-85303054 | intron variant                  | MODIFIER | Orc6    | ENSMUSG00000031697 | Transcript        | ENSMUST00000170141  | protein_coding          | rs32998051  |
| 8:85303054-85303054 | upstream gene variant           | MODIFIER | Vps35   | ENSMUSG00000031696 | Transcript        | ENSMUST00000209228  | processed transcript    | rs32998051  |
| 8:85303054-85303054 | downstream gene variant         | MODIFIER | Orc6    | ENSMUSG00000031697 | Transcript        | ENSMUST00000209733  | retained intron         | rs32998051  |
| 8:85303054-85303054 | intron variant,NMD transcript v | MODIFIER | Orc6    | ENSMUSG00000031697 | Transcript        | ENSMUST00000210146  | nonsense mediated decay | rs32998051  |
| 8:85303054-85303054 | upstream_gene_variant           | MODIFIER | Orc6    | ENSMUSG00000031697 | Transcript        | ENSMUST00000210458  | retained_intron         | rs32998051  |
| 8:85303054-85303054 | upstream_gene_variant           | MODIFIER | Vps35   | ENSMUSG00000031696 | Transcript        | ENSMUST00000211154  | processed_transcript    | rs32998051  |
| 8:85303054-85303054 | intron_variant                  | MODIFIER | Orc6    | ENSMUSG00000031697 | Transcript        | ENSMUST00000211396  | protein_coding          | rs32998051  |
| 8:85303054-85303054 | upstream gene variant           | MODIFIER | Vps35   | ENSMUSG00000031696 | Transcript        | ENSMUST00000211479  | retained intron         | rs32998051  |
| 8:85303054-85303054 | intron variant                  | MODIFIER | Orc6    | ENSMUSG00000031697 | Transcript        | ENSMUST00000211597  | protein_coding          | rs32998051  |
| 8:85518021-85518021 | synonymous variant              | LOW      | Gpt2    | ENSMUSG00000031700 | Transcript        | ENSMUST00000034136  | protein_coding          | rs13472149  |
| 8:85518021-85518021 | 3_prime_UTR_variant,NMD_trar    | MODIFIER | Gpt2    | ENSMUSG00000031700 | Transcript        | ENSMUST00000132932  | nonsense_mediated_decay | rs13472149  |
| 8:85518021-85518021 | non_coding_transcript_exon_var  | MODIFIER | Gpt2    | ENSMUSG00000031700 | Transcript        | ENSMUST00000140189  | retained_intron         | rs13472149  |
| 8:85518021-85518021 | upstream_gene_variant           | MODIFIER | Gpt2    | ENSMUSG00000031700 | Transcript        | ENSMUST00000143846  | processed_transcript    | rs13472149  |
| 8:85521350-85521350 | synonymous variant              | LOW      | Gpt2    | ENSMUSG00000031700 | Transcript        | ENSMUST00000034136  | protein_coding          | rs32795953  |
| 8:85521350-85521350 | 3 prime UTR variant,NMD trar    | MODIFIER | Gpt2    | ENSMUSG00000031700 | Transcript        | ENSMUST00000132932  | nonsense mediated decay | rs32795953  |
| 8:85521350-85521350 | non coding transcript exon var  | MODIFIER | Gpt2    | ENSMUSG00000031700 | Transcript        | ENSMUST00000140189  | retained intron         | rs32795953  |
| 8:85521350-85521350 | 3_prime_UTR_variant             | MODIFIER | Gpt2    | ENSMUSG00000031700 | Transcript        | ENSMUST00000143846  | processed transcript    | rs32795953  |
| 8:85526930-85526930 | 3_prime_UTR_variant             | MODIFIER | Gpt2    | ENSMUSG00000031700 | Transcript        | ENSMUST00000034136  | protein_coding          | rs4227299   |
| 8:85526930-85526930 | downstream_gene_variant         | MODIFIER | Gpt2    | ENSMUSG00000031700 | Transcript        | ENSMUST00000132932  | nonsense_mediated_decay | rs4227299   |
| 8:85526930-85526930 | downstream_gene_variant         | MODIFIER | Gpt2    | ENSMUSG00000031700 | Transcript        | ENSMUST00000143846  | processed_transcript    | rs4227299   |

|                     |                                 |          |         |                     |                   |                     |                         |             |
|---------------------|---------------------------------|----------|---------|---------------------|-------------------|---------------------|-------------------------|-------------|
| 8:85540615-85540615 | intron variant                  | MODIFIER | Dnaja2  | ENSMUSG00000031701  | Transcript        | ENSMUST00000034138  | protein coding          | rs33211735  |
| 8:85541016-85541016 | intron_variant                  | MODIFIER | Dnaja2  | ENSMUSG000000031701 | Transcript        | ENSMUST000000034138 | protein_coding          | rs33279848  |
| 8:85541636-85541636 | intron_variant                  | MODIFIER | Dnaja2  | ENSMUSG000000031701 | Transcript        | ENSMUST000000034138 | protein_coding          | rs51956125  |
| 8:85541961-85541961 | intron_variant                  | MODIFIER | Dnaja2  | ENSMUSG000000031701 | Transcript        | ENSMUST000000034138 | protein_coding          | rs36282735  |
| 8:85541961-85541961 | downstream gene variant         | MODIFIER | Dnaja2  | ENSMUSG000000031701 | Transcript        | ENSMUST000000211630 | retained intron         | rs36282735  |
| 8:85542118-85542118 | intron variant                  | MODIFIER | Dnaja2  | ENSMUSG000000031701 | Transcript        | ENSMUST000000034138 | protein coding          | rs50206689  |
| 8:85542118-85542118 | downstream gene variant         | MODIFIER | Dnaja2  | ENSMUSG000000031701 | Transcript        | ENSMUST000000211630 | retained intron         | rs50206689  |
| 8:85542597-85542597 | intron_variant                  | MODIFIER | Dnaja2  | ENSMUSG000000031701 | Transcript        | ENSMUST000000034138 | protein_coding          | rs36298745  |
| 8:85542597-85542597 | downstream_gene_variant         | MODIFIER | Dnaja2  | ENSMUSG000000031701 | Transcript        | ENSMUST000000211630 | retained_intron         | rs36298745  |
| 8:85544503-85544503 | intron_variant                  | MODIFIER | Dnaja2  | ENSMUSG000000031701 | Transcript        | ENSMUST000000034138 | protein_coding          | rs246589420 |
| 8:85544503-85544503 | downstream gene variant         | MODIFIER | Dnaja2  | ENSMUSG000000031701 | Transcript        | ENSMUST000000211630 | retained intron         | rs246589420 |
| 8:85546289-85546289 | intron variant                  | MODIFIER | Dnaja2  | ENSMUSG000000031701 | Transcript        | ENSMUST000000034138 | protein coding          | rs33171266  |
| 8:85546289-85546289 | downstream gene variant         | MODIFIER | Dnaja2  | ENSMUSG000000031701 | Transcript        | ENSMUST000000211630 | retained intron         | rs33171266  |
| 8:85554241-85554241 | intron variant                  | MODIFIER | Dnaja2  | ENSMUSG000000031701 | Transcript        | ENSMUST000000034138 | protein coding          | rs33134687  |
| 8:85554241-85554241 | upstream_gene_variant           | MODIFIER | Dnaja2  | ENSMUSG000000031701 | Transcript        | ENSMUST000000211630 | retained_intron         | rs33134687  |
| 8:85554241-85554241 | regulatory_region_variant       | MODIFIER | -       | -                   | RegulatoryFeature | ENSMUSR00000262417  | promoter                | rs33134687  |
| 8:85841291-85841291 | upstream_gene_variant           | MODIFIER | lftg1   | ENSMUSG00000031703  | Transcript        | ENSMUST000000034140 | protein_coding          | rs33463582  |
| 8:85841291-85841291 | intron variant                  | MODIFIER | Phkb    | ENSMUSG00000036879  | Transcript        | ENSMUST000000053771 | protein_coding          | rs33463582  |
| 8:85841291-85841291 | intron variant,non coding trans | MODIFIER | Phkb    | ENSMUSG00000036879  | Transcript        | ENSMUST00000159716  | processed transcript    | rs33463582  |
| 8:85841291-85841291 | intron variant,non coding trans | MODIFIER | Phkb    | ENSMUSG00000036879  | Transcript        | ENSMUST00000159882  | processed transcript    | rs33463582  |
| 8:85841291-85841291 | intron_variant,NMD_transcript_v | MODIFIER | Phkb    | ENSMUSG00000036879  | Transcript        | ENSMUST00000160611  | nonsense_mediated_decay | rs33463582  |
| 8:85841291-85841291 | intron variant                  | MODIFIER | Phkb    | ENSMUSG00000036879  | Transcript        | ENSMUST00000161850  | protein_coding          | rs33463582  |
| 8:85841291-85841291 | upstream_gene_variant           | MODIFIER | Phkb    | ENSMUSG00000036879  | Transcript        | ENSMUST00000162464  | protein_coding          | rs33463582  |
| 8:85841291-85841291 | upstream gene variant           | MODIFIER | Phkb    | ENSMUSG00000036879  | Transcript        | ENSMUST00000162981  | nonsense mediated decay | rs33463582  |
| 8:85841291-85841291 | regulatory region variant       | MODIFIER | -       | -                   | RegulatoryFeature | ENSMUSR000000262450 | promoter                | rs33463582  |
| 8:85842275-85842275 | upstream gene variant           | MODIFIER | lftq1   | ENSMUSG000000031703 | Transcript        | ENSMUST000000034140 | protein coding          | rs47203178  |
| 8:85842275-85842275 | intron variant                  | MODIFIER | Phkb    | ENSMUSG00000036879  | Transcript        | ENSMUST000000053771 | protein coding          | rs47203178  |
| 8:85842275-85842275 | intron_variant,non_coding_trans | MODIFIER | Phkb    | ENSMUSG00000036879  | Transcript        | ENSMUST00000159716  | processed_transcript    | rs47203178  |
| 8:85842275-85842275 | intron_variant,non_coding_trans | MODIFIER | Phkb    | ENSMUSG00000036879  | Transcript        | ENSMUST00000159882  | processed_transcript    | rs47203178  |
| 8:85842275-85842275 | intron_variant,NMD_transcript_v | MODIFIER | Phkb    | ENSMUSG00000036879  | Transcript        | ENSMUST00000160611  | nonsense_mediated_decay | rs47203178  |
| 8:85842275-85842275 | intron variant                  | MODIFIER | Phkb    | ENSMUSG00000036879  | Transcript        | ENSMUST00000161850  | protein coding          | rs47203178  |
| 8:85842275-85842275 | upstream gene variant           | MODIFIER | Phkb    | ENSMUSG00000036879  | Transcript        | ENSMUST00000162464  | protein coding          | rs47203178  |
| 8:85842275-85842275 | upstream gene variant           | MODIFIER | Phkb    | ENSMUSG00000036879  | Transcript        | ENSMUST00000162981  | nonsense mediated decay | rs47203178  |
| 8:85842275-85842275 | regulatory_region_variant       | MODIFIER | -       | -                   | RegulatoryFeature | ENSMUSR00000735876  | promoter                | rs47203178  |
| 8:85937416-85937416 | intron_variant                  | MODIFIER | Phkb    | ENSMUSG00000036879  | Transcript        | ENSMUST000000053771 | protein_coding          | rs49468284  |
| 8:85937416-85937416 | downstream_gene_variant         | MODIFIER | Phkb    | ENSMUSG00000036879  | Transcript        | ENSMUST00000160611  | nonsense_mediated_decay | rs49468284  |
| 8:85937416-85937416 | regulatory region variant       | MODIFIER | -       | -                   | RegulatoryFeature | ENSMUSR00000735884  | open chromatin region   | rs49468284  |
| 8:88163759-88163759 | intron variant                  | MODIFIER | Heatr3  | ENSMUSG000000031657 | Transcript        | ENSMUST000000034079 | protein coding          | rs48244720  |
| 8:88163759-88163759 | intron variant                  | MODIFIER | Heatr3  | ENSMUSG000000031657 | Transcript        | ENSMUST00000121949  | protein coding          | rs48244720  |
| 8:88163759-88163759 | upstream gene variant           | MODIFIER | Heatr3  | ENSMUSG000000031657 | Transcript        | ENSMUST00000137452  | retained intron         | rs48244720  |
| 8:88163759-88163759 | intron_variant,non_coding_trans | MODIFIER | Heatr3  | ENSMUSG000000031657 | Transcript        | ENSMUST00000146946  | retained_intron         | rs48244720  |
| 8:88255035-88255035 | intron_variant                  | MODIFIER | Papd5   | ENSMUSG00000036779  | Transcript        | ENSMUST00000066748  | protein_coding          | rs33154920  |
| 8:88255035-88255035 | intron_variant                  | MODIFIER | Papd5   | ENSMUSG00000036779  | Transcript        | ENSMUST00000118952  | protein_coding          | rs33154920  |
| 8:88255035-88255035 | intron variant                  | MODIFIER | Papd5   | ENSMUSG00000036779  | Transcript        | ENSMUST00000119033  | protein coding          | rs33154920  |
| 8:88255035-88255035 | intron variant                  | MODIFIER | Papd5   | ENSMUSG00000036779  | Transcript        | ENSMUST00000154115  | protein coding          | rs33154920  |
| 8:97164648-97164648 | upstream gene variant           | MODIFIER | Gm45703 | ENSMUSG000000110567 | Transcript        | ENSMUST00000212293  | lincRNA                 | -           |
| 8:97164648-97164648 | non_coding_transcript_exon_var  | MODIFIER | Gm5131  | ENSMUSG000000110715 | Transcript        | ENSMUST00000212776  | processed_pseudogene    | -           |
| 9:35070069-35070069 | intron_variant                  | MODIFIER | St3gal4 | ENSMUSG000000032038 | Transcript        | ENSMUST00000034537  | protein_coding          | rs238036721 |
| 9:35070069-35070069 | intron_variant                  | MODIFIER | St3gal4 | ENSMUSG000000032038 | Transcript        | ENSMUST000000213526 | protein_coding          | rs238036721 |
| 9:35070069-35070069 | intron variant                  | MODIFIER | St3gal4 | ENSMUSG000000032038 | Transcript        | ENSMUST000000214526 | protein coding          | rs238036721 |
| 9:35070069-35070069 | intron variant                  | MODIFIER | St3gal4 | ENSMUSG000000032038 | Transcript        | ENSMUST000000215089 | protein coding          | rs238036721 |
| 9:35070069-35070069 | intron variant                  | MODIFIER | St3gal4 | ENSMUSG000000032038 | Transcript        | ENSMUST00000215638  | protein coding          | rs238036721 |
| 9:35070069-35070069 | intron variant                  | MODIFIER | St3gal4 | ENSMUSG000000032038 | Transcript        | ENSMUST00000216557  | protein coding          | rs238036721 |
| 9:35070069-35070069 | intron_variant                  | MODIFIER | St3gal4 | ENSMUSG000000032038 | Transcript        | ENSMUST00000217149  | protein_coding          | rs238036721 |
| 9:35070069-35070069 | intron_variant                  | MODIFIER | St3gal4 | ENSMUSG000000032038 | Transcript        | ENSMUST00000217542  | protein_coding          | rs238036721 |
| 9:35098214-35098214 | intron_variant                  | MODIFIER | St3gal4 | ENSMUSG000000032038 | Transcript        | ENSMUST00000034537  | protein_coding          | rs46286313  |
| 9:35098214-35098214 | intron variant                  | MODIFIER | St3gal4 | ENSMUSG000000032038 | Transcript        | ENSMUST00000213526  | protein coding          | rs46286313  |
| 9:35098214-35098214 | intron variant                  | MODIFIER | St3gal4 | ENSMUSG000000032038 | Transcript        | ENSMUST000000214526 | protein coding          | rs46286313  |
| 9:35098214-35098214 | intron variant                  | MODIFIER | St3gal4 | ENSMUSG000000032038 | Transcript        | ENSMUST000000215089 | protein coding          | rs46286313  |
| 9:35098214-35098214 | intron_variant                  | MODIFIER | St3gal4 | ENSMUSG000000032038 | Transcript        | ENSMUST00000216557  | protein_coding          | rs46286313  |
| 9:35098214-35098214 | intron variant                  | MODIFIER | St3gal4 | ENSMUSG000000032038 | Transcript        | ENSMUST00000217149  | protein_coding          | rs46286313  |
| 9:35098326-35098326 | intron_variant                  | MODIFIER | St3gal4 | ENSMUSG000000032038 | Transcript        | ENSMUST000000034537 | protein_coding          | -           |
| 9:35098326-35098326 | intron variant                  | MODIFIER | St3gal4 | ENSMUSG000000032038 | Transcript        | ENSMUST00000213526  | protein coding          | -           |
| 9:35098326-35098326 | intron variant                  | MODIFIER | St3gal4 | ENSMUSG000000032038 | Transcript        | ENSMUST00000214526  | protein coding          | -           |
| 9:35098326-35098326 | intron variant                  | MODIFIER | St3gal4 | ENSMUSG000000032038 | Transcript        | ENSMUST00000215089  | protein coding          | -           |
| 9:35098326-35098326 | intron variant                  | MODIFIER | St3gal4 | ENSMUSG000000032038 | Transcript        | ENSMUST00000216557  | protein coding          | -           |
| 9:35098326-35098326 | intron_variant                  | MODIFIER | St3gal4 | ENSMUSG000000032038 | Transcript        | ENSMUST00000217149  | protein_coding          | -           |
| 9:36738780-36738780 | intron_variant                  | MODIFIER | Stt3a   | ENSMUSG000000032116 | Transcript        | ENSMUST00000120381  | protein_coding          | rs30382764  |
| 9:36738780-36738780 | intron_variant                  | MODIFIER | Stt3a   | ENSMUSG000000032116 | Transcript        | ENSMUST00000135934  | protein_coding          | rs30382764  |

|                        |                                 |          |          |                    |                   |                     |                         |             |
|------------------------|---------------------------------|----------|----------|--------------------|-------------------|---------------------|-------------------------|-------------|
| 9:37348134-37348134    | 5 prime UTR variant             | MODIFIER | Ccdc15   | ENSMUSG00000034303 | Transcript        | ENSMUST00000037275  | protein coding          | rs30280017  |
| 9:37348134-37348134    | intron_variant                  | MODIFIER | Ccdc15   | ENSMUSG00000034303 | Transcript        | ENSMUST00000213633  | protein_coding          | rs30280017  |
| 9:37348134-37348134    | 5_prime_UTR_variant,NMD_trar    | MODIFIER | Ccdc15   | ENSMUSG00000034303 | Transcript        | ENSMUST00000215116  | nonsense_mediated_decay | rs30280017  |
| 9:37348134-37348134    | intron_variant                  | MODIFIER | Ccdc15   | ENSMUSG00000034303 | Transcript        | ENSMUST00000216042  | protein_coding          | rs30280017  |
| 9:37348134-37348134    | non coding transcript exon var  | MODIFIER | Ccdc15   | ENSMUSG00000034303 | Transcript        | ENSMUST00000216060  | retained_intron         | rs30280017  |
| 9:37348134-37348134    | 5 prime UTR variant             | MODIFIER | Ccdc15   | ENSMUSG00000034303 | Transcript        | ENSMUST00000217238  | protein_coding          | rs30280017  |
| 9:37348134-37348134    | regulatory region variant       | MODIFIER | -        | -                  | RegulatoryFeature | ENSMUSR00000271801  | promoter                | rs30280017  |
| 9:37651591-37651591    | downstream_gene_variant         | MODIFIER | Siae     | ENSMUSG00000001942 | Transcript        | ENSMUST00000002007  | protein_coding          | rs225251701 |
| 9:37651591-37651591    | intron_variant                  | MODIFIER | Tbrg1    | ENSMUSG00000011114 | Transcript        | ENSMUST000000117654 | protein_coding          | rs225251701 |
| 9:37651591-37651591    | downstream_gene_variant         | MODIFIER | Tbrg1    | ENSMUSG00000011114 | Transcript        | ENSMUST00000126062  | retained_intron         | rs225251701 |
| 9:37651591-37651591    | downstream gene variant         | MODIFIER | Tbrg1    | ENSMUSG00000011114 | Transcript        | ENSMUST00000134711  | retained_intron         | rs225251701 |
| 9:37651591-37651591    | intron variant,NMD transcript v | MODIFIER | Tbrg1    | ENSMUSG00000011114 | Transcript        | ENSMUST00000142736  | nonsense_mediated_decay | rs225251701 |
| 9:37651591-37651591    | downstream gene variant         | MODIFIER | Siae     | ENSMUSG00000001942 | Transcript        | ENSMUST00000213126  | protein_coding          | rs225251701 |
| 9:37651591-37651591    | downstream gene variant         | MODIFIER | Siae     | ENSMUSG00000001942 | Transcript        | ENSMUST00000215474  | protein_coding          | rs225251701 |
| 9:65902572-65902572    | 3_prime_UTR_variant             | MODIFIER | Pclaf    | ENSMUSG00000040204 | Transcript        | ENSMUST00000045802  | protein_coding          | -           |
| 9:65902572-65902572    | downstream_gene_variant         | MODIFIER | Gm23248  | ENSMUSG00000065301 | Transcript        | ENSMUST00000083367  | snRNA                   | -           |
| 9:65902572-65902572    | intron_variant                  | MODIFIER | Trip4    | ENSMUSG00000032386 | Transcript        | ENSMUST00000119245  | protein_coding          | -           |
| 9:65902572-65902572    | intron variant,non coding trans | MODIFIER | Trip4    | ENSMUSG00000032386 | Transcript        | ENSMUST00000126517  | processed_transcript    | -           |
| 9:65902572-65902572    | intron variant,non coding trans | MODIFIER | Trip4    | ENSMUSG00000032386 | Transcript        | ENSMUST00000133747  | processed_transcript    | -           |
| 9:65902572-65902572    | intron variant                  | MODIFIER | Trip4    | ENSMUSG00000032386 | Transcript        | ENSMUST00000134338  | protein_coding          | -           |
| 9:65902572-65902572    | intron_variant,non_coding_trans | MODIFIER | Trip4    | ENSMUSG00000032386 | Transcript        | ENSMUST00000139346  | retained_intron         | -           |
| 9:65902572-65902572    | intron_variant,non_coding_trans | MODIFIER | Trip4    | ENSMUSG00000032386 | Transcript        | ENSMUST00000143864  | processed_transcript    | -           |
| 9:65902572-65902572    | intron_variant                  | MODIFIER | Trip4    | ENSMUSG00000032386 | Transcript        | ENSMUST00000179395  | protein_coding          | -           |
| 10:112925433-112925433 | 3 prime UTR variant             | MODIFIER | Atxn713b | ENSMUSG00000074748 | Transcript        | ENSMUST00000099276  | protein_coding          | -           |
| 10:112925433-112925433 | downstream gene variant         | MODIFIER | Atxn713b | ENSMUSG00000074748 | Transcript        | ENSMUST00000165438  | processed_transcript    | -           |
| 10:112925433-112925433 | upstream gene variant           | MODIFIER | Gm26596  | ENSMUSG00000097185 | Transcript        | ENSMUST00000180464  | TEC                     | -           |
| 10:4154510-4154510     | intron variant                  | MODIFIER | Mthfd1l  | ENSMUSG00000040675 | Transcript        | ENSMUST00000043735  | protein_coding          | rs29374712  |
| 10:4154510-4154510     | intron_variant                  | MODIFIER | Mthfd1l  | ENSMUSG00000040675 | Transcript        | ENSMUST00000117291  | protein_coding          | rs29374712  |
| 10:4154510-4154510     | intron_variant                  | MODIFIER | Mthfd1l  | ENSMUSG00000040675 | Transcript        | ENSMUST00000120585  | protein_coding          | rs29374712  |
| 10:4154510-4154510     | regulatory_region_variant       | MODIFIER | -        | -                  | RegulatoryFeature | ENSMUSR00000496730  | enhancer                | rs29374712  |
| 10:4398164-4398164     | downstream gene variant         | MODIFIER | Rmnd1    | ENSMUSG00000019763 | Transcript        | ENSMUST00000042251  | protein_coding          | rs29357159  |
| 10:4398164-4398164     | downstream gene variant         | MODIFIER | Gm21781  | ENSMUSG00000095123 | Transcript        | ENSMUST00000178920  | lincRNA                 | rs29357159  |
| 10:4398168-4398168     | downstream gene variant         | MODIFIER | Rmnd1    | ENSMUSG00000019763 | Transcript        | ENSMUST00000042251  | protein_coding          | rs29338922  |
| 10:4398168-4398168     | downstream_gene_variant         | MODIFIER | Gm21781  | ENSMUSG00000095123 | Transcript        | ENSMUST00000178920  | lincRNA                 | rs29338922  |
| 10:4432327-4432327     | 5_prime_UTR_variant             | MODIFIER | Rmnd1    | ENSMUSG00000019763 | Transcript        | ENSMUST00000042251  | protein_coding          | rs29364026  |
| 10:4432327-4432327     | upstream_gene_variant           | MODIFIER | Armt1    | ENSMUSG00000061759 | Transcript        | ENSMUST00000095893  | protein_coding          | rs29364026  |
| 10:4432327-4432327     | upstream gene variant           | MODIFIER | Armt1    | ENSMUSG00000061759 | Transcript        | ENSMUST00000117489  | protein_coding          | rs29364026  |
| 10:4432327-4432327     | upstream gene variant           | MODIFIER | Armt1    | ENSMUSG00000061759 | Transcript        | ENSMUST00000118544  | protein_coding          | rs29364026  |
| 10:4432327-4432327     | 5 prime UTR variant             | MODIFIER | Rmnd1    | ENSMUSG00000019763 | Transcript        | ENSMUST00000126102  | protein_coding          | rs29364026  |
| 10:4432327-4432327     | upstream gene variant           | MODIFIER | Armt1    | ENSMUSG00000061759 | Transcript        | ENSMUST00000131636  | processed_transcript    | rs29364026  |
| 10:4432327-4432327     | 5_prime_UTR_variant             | MODIFIER | Rmnd1    | ENSMUSG00000019763 | Transcript        | ENSMUST00000131853  | protein_coding          | rs29364026  |
| 10:4432327-4432327     | upstream_gene_variant           | MODIFIER | Armt1    | ENSMUSG00000061759 | Transcript        | ENSMUST00000134484  | retained_intron         | rs29364026  |
| 10:4432327-4432327     | upstream_gene_variant           | MODIFIER | Armt1    | ENSMUSG00000061759 | Transcript        | ENSMUST00000143037  | processed_transcript    | rs29364026  |
| 10:4432327-4432327     | upstream gene variant           | MODIFIER | Rmnd1    | ENSMUSG00000019763 | Transcript        | ENSMUST00000148566  | retained_intron         | rs29364026  |
| 10:4432327-4432327     | upstream gene variant           | MODIFIER | Armt1    | ENSMUSG00000061759 | Transcript        | ENSMUST00000152294  | nonsense_mediated_decay | rs29364026  |
| 10:4432327-4432327     | upstream gene variant           | MODIFIER | Rmnd1    | ENSMUSG00000019763 | Transcript        | ENSMUST00000155172  | protein_coding          | rs29364026  |
| 10:4432327-4432327     | non_coding_transcript_exon_var  | MODIFIER | Rmnd1    | ENSMUSG00000019763 | Transcript        | ENSMUST00000156940  | retained_intron         | rs29364026  |
| 10:4432327-4432327     | regulatory_region_variant       | MODIFIER | -        | -                  | RegulatoryFeature | ENSMUSR00000021288  | promoter                | rs29364026  |
| 10:77916969-77916969   | intron_variant,non_coding_trans | MODIFIER | Trpm2    | ENSMUSG00000009292 | Transcript        | ENSMUST00000105400  | processed_transcript    | -           |
| 10:77916969-77916969   | intron variant                  | MODIFIER | Trpm2    | ENSMUSG00000009292 | Transcript        | ENSMUST00000105401  | protein_coding          | -           |
| 10:77916969-77916969   | downstream gene variant         | MODIFIER | Trpm2    | ENSMUSG00000009292 | Transcript        | ENSMUST00000126206  | retained_intron         | -           |
| 10:77916969-77916969   | non coding transcript exon var  | MODIFIER | Trpm2    | ENSMUSG00000009292 | Transcript        | ENSMUST00000138238  | retained_intron         | -           |
| 10:77916969-77916969   | intron variant,non coding trans | MODIFIER | Trpm2    | ENSMUSG00000009292 | Transcript        | ENSMUST00000140471  | retained_intron         | -           |
| 10:77916969-77916969   | intron_variant,non_coding_trans | MODIFIER | Trpm2    | ENSMUSG00000009292 | Transcript        | ENSMUST00000153842  | retained_intron         | -           |
| 10:77916969-77916969   | upstream_gene_variant           | MODIFIER | Gm22871  | ENSMUSG00000093443 | Transcript        | ENSMUST00000177097  | snoRNA                  | -           |
| 10:77916969-77916969   | upstream_gene_variant           | MODIFIER | Gm22394  | ENSMUSG00000093784 | Transcript        | ENSMUST00000177209  | snoRNA                  | -           |
| 10:77916969-77916969   | downstream gene variant         | MODIFIER | Trpm2    | ENSMUSG00000009292 | Transcript        | ENSMUST00000217806  | retained_intron         | -           |
| 10:77916969-77916969   | regulatory region variant       | MODIFIER | -        | -                  | RegulatoryFeature | ENSMUSR00000031846  | CTCF binding site       | -           |
| 10:77916969-77916969   | regulatory region variant       | MODIFIER | -        | -                  | RegulatoryFeature | ENSMUSR00000031847  | TF binding site         | -           |
| 10:13178391-13178391   | 3_prime_UTR_variant             | MODIFIER | Ltv1     | ENSMUSG00000019814 | Transcript        | ENSMUST00000019950  | protein_coding          | rs29363713  |
| 10:13178391-13178391   | upstream_gene_variant           | MODIFIER | Zc2hc1b  | ENSMUSG00000019815 | Transcript        | ENSMUST00000019954  | protein_coding          | rs29363713  |
| 10:13178391-13178391   | downstream_gene_variant         | MODIFIER | Ltv1     | ENSMUSG00000019814 | Transcript        | ENSMUST00000219824  | processed_transcript    | rs29363713  |
| 10:13178391-13178391   | upstream gene variant           | MODIFIER | Zc2hc1b  | ENSMUSG00000019815 | Transcript        | ENSMUST00000219970  | processed_transcript    | rs29363713  |
| 10:14403831-14403831   | 3 prime UTR variant             | MODIFIER | Adgrg6   | ENSMUSG00000039116 | Transcript        | ENSMUST00000041168  | protein_coding          | rs29323801  |
| 10:14403831-14403831   | downstream gene variant         | MODIFIER | Adgrg6   | ENSMUSG00000039116 | Transcript        | ENSMUST00000208429  | protein_coding          | rs29323801  |
| 10:14403831-14403831   | regulatory region variant       | MODIFIER | -        | -                  | RegulatoryFeature | ENSMUSR000000307430 | CTCF binding site       | rs29323801  |
| 10:14403851-14403851   | 3_prime_UTR_variant             | MODIFIER | Adgrg6   | ENSMUSG00000039116 | Transcript        | ENSMUST00000041168  | protein_coding          | rs29338864  |
| 10:14403851-14403851   | downstream_gene_variant         | MODIFIER | Adgrg6   | ENSMUSG00000039116 | Transcript        | ENSMUST00000208429  | protein_coding          | rs29338864  |
| 10:14403851-14403851   | regulatory_region_variant       | MODIFIER | -        | -                  | RegulatoryFeature | ENSMUSR000000307430 | CTCF_binding_site       | rs29338864  |

clal\_RF

|                        |                                 |          |          |                    |                   |                    |                         |             |
|------------------------|---------------------------------|----------|----------|--------------------|-------------------|--------------------|-------------------------|-------------|
| 10:14404135-14404135   | 3 prime UTR variant             | MODIFIER | Adgrg6   | ENSMUSG00000039116 | Transcript        | ENSMUST00000041168 | protein coding          | rs29366370  |
| 10:14404135-14404135   | downstream_gene_variant         | MODIFIER | Adgrg6   | ENSMUSG00000039116 | Transcript        | ENSMUST00000208429 | protein coding          | rs29366370  |
| 10:14404135-14404135   | regulatory_region_variant       | MODIFIER | -        | -                  | RegulatoryFeature | ENSMUSR00000307430 | CTCF_binding_site       | rs29366370  |
| 10:14404135-14404135   | regulatory_region_variant       | MODIFIER | -        | -                  | RegulatoryFeature | ENSMUSR00000497860 | TF_binding_site         | rs29366370  |
| 10:14404145-14404145   | 3 prime UTR variant             | MODIFIER | Adgrg6   | ENSMUSG00000039116 | Transcript        | ENSMUST00000041168 | protein coding          | rs29363372  |
| 10:14404145-14404145   | downstream gene variant         | MODIFIER | Adgrg6   | ENSMUSG00000039116 | Transcript        | ENSMUST00000208429 | protein coding          | rs29363372  |
| 10:14404145-14404145   | regulatory region variant       | MODIFIER | -        | -                  | RegulatoryFeature | ENSMUSR00000307430 | CTCF binding site       | rs29363372  |
| 10:14404145-14404145   | regulatory_region_variant       | MODIFIER | -        | -                  | RegulatoryFeature | ENSMUSR00000497860 | TF_binding_site         | rs29363372  |
| 10:14404569-14404569   | 3_prime_UTR_variant             | MODIFIER | Adgrg6   | ENSMUSG00000039116 | Transcript        | ENSMUST00000041168 | protein coding          | rs29312342  |
| 10:14404569-14404569   | downstream_gene_variant         | MODIFIER | Adgrg6   | ENSMUSG00000039116 | Transcript        | ENSMUST00000208429 | protein coding          | rs29312342  |
| 10:14404569-14404569   | regulatory region variant       | MODIFIER | -        | -                  | RegulatoryFeature | ENSMUSR00000307430 | CTCF binding site       | rs29312342  |
| 10:14404863-14404863   | 3 prime UTR variant             | MODIFIER | Adgrg6   | ENSMUSG00000039116 | Transcript        | ENSMUST00000041168 | protein coding          | rs29358617  |
| 10:14404863-14404863   | downstream gene variant         | MODIFIER | Adgrg6   | ENSMUSG00000039116 | Transcript        | ENSMUST00000208429 | protein coding          | rs29358617  |
| 10:18019258-18019258   | intron variant                  | MODIFIER | Abracl   | ENSMUSG00000078453 | Transcript        | ENSMUST0000020002  | protein coding          | rs33598044  |
| 10:18019258-18019258   | intron_variant                  | MODIFIER | Abracl   | ENSMUSG00000078453 | Transcript        | ENSMUST00000218994 | protein coding          | rs33598044  |
| 10:18019258-18019258   | intron_variant                  | MODIFIER | Abracl   | ENSMUSG00000078453 | Transcript        | ENSMUST00000220110 | protein coding          | rs33598044  |
| 10:18019258-18019258   | intron_variant                  | MODIFIER | Abracl   | ENSMUSG00000078453 | Transcript        | ENSMUST00000220433 | protein coding          | rs33598044  |
| 11:101578871-101578871 | upstream gene variant           | MODIFIER | Tmem106a | ENSMUSG00000034947 | Transcript        | ENSMUST00000039581 | protein coding          | -           |
| 11:101578871-101578871 | intron variant                  | MODIFIER | Nbr1     | ENSMUSG00000017119 | Transcript        | ENSMUST00000071537 | protein coding          | -           |
| 11:101578871-101578871 | upstream gene variant           | MODIFIER | Tmem106a | ENSMUSG00000034947 | Transcript        | ENSMUST00000100403 | protein coding          | -           |
| 11:101578871-101578871 | intron_variant                  | MODIFIER | Nbr1     | ENSMUSG00000017119 | Transcript        | ENSMUST00000103098 | protein coding          | -           |
| 11:101578871-101578871 | intron_variant                  | MODIFIER | Nbr1     | ENSMUSG00000017119 | Transcript        | ENSMUST00000103099 | protein coding          | -           |
| 11:101578871-101578871 | upstream_gene_variant           | MODIFIER | Tmem106a | ENSMUSG00000034947 | Transcript        | ENSMUST00000107194 | protein coding          | -           |
| 11:101578871-101578871 | intron variant                  | MODIFIER | Nbr1     | ENSMUSG00000017119 | Transcript        | ENSMUST00000107208 | protein coding          | -           |
| 11:101578871-101578871 | intron variant                  | MODIFIER | Nbr1     | ENSMUSG00000017119 | Transcript        | ENSMUST00000107212 | protein coding          | -           |
| 11:101578871-101578871 | intron variant                  | MODIFIER | Nbr1     | ENSMUSG00000017119 | Transcript        | ENSMUST00000107213 | protein coding          | -           |
| 11:101578871-101578871 | intron variant                  | MODIFIER | Nbr1     | ENSMUSG00000017119 | Transcript        | ENSMUST00000107218 | protein coding          | -           |
| 11:101578871-101578871 | intron_variant,NMD_transcript_v | MODIFIER | Nbr1     | ENSMUSG00000017119 | Transcript        | ENSMUST00000123558 | nonsense_mediated_decay | -           |
| 11:101578871-101578871 | upstream_gene_variant           | MODIFIER | Tmem106a | ENSMUSG00000034947 | Transcript        | ENSMUST00000128614 | protein coding          | -           |
| 11:101578871-101578871 | intron_variant,non_coding_trans | MODIFIER | Nbr1     | ENSMUSG00000017119 | Transcript        | ENSMUST00000141170 | retained_intron         | -           |
| 11:101578871-101578871 | upstream gene variant           | MODIFIER | Tmem106a | ENSMUSG00000034947 | Transcript        | ENSMUST00000143045 | processed transcript    | -           |
| 11:101578871-101578871 | downstream gene variant         | MODIFIER | Nbr1     | ENSMUSG00000017119 | Transcript        | ENSMUST00000148805 | retained_intron         | -           |
| 11:101578871-101578871 | intron variant                  | MODIFIER | Nbr1     | ENSMUSG00000017119 | Transcript        | ENSMUST00000149019 | protein coding          | -           |
| 11:101578871-101578871 | downstream_gene_variant         | MODIFIER | Nbr1     | ENSMUSG00000017119 | Transcript        | ENSMUST00000172744 | retained_intron         | -           |
| 11:116123864-116123864 | downstream_gene_variant         | MODIFIER | Trim65   | ENSMUSG00000054517 | Transcript        | ENSMUST00000067632 | protein coding          | -           |
| 11:116123864-116123864 | 3_prime_UTR_variant             | MODIFIER | Trim65   | ENSMUSG00000054517 | Transcript        | ENSMUST00000106440 | protein coding          | -           |
| 11:116123864-116123864 | intron_variant,non_coding_trans | MODIFIER | Trim47   | ENSMUSG00000020773 | Transcript        | ENSMUST00000133039 | processed transcript    | -           |
| 11:116123864-116123864 | downstream gene variant         | MODIFIER | Trim65   | ENSMUSG00000054517 | Transcript        | ENSMUST00000154061 | processed transcript    | -           |
| 11:17944548-17944548   | intron variant                  | MODIFIER | Etaa1    | ENSMUSG00000016984 | Transcript        | ENSMUST00000076661 | protein coding          | rs237839084 |
| 11:3920136-3920136     | intron variant                  | MODIFIER | Tcn2     | ENSMUSG00000020432 | Transcript        | ENSMUST00000020710 | protein coding          | -           |
| 11:3920136-3920136     | intron_variant                  | MODIFIER | Tcn2     | ENSMUSG00000020432 | Transcript        | ENSMUST00000109988 | protein coding          | -           |
| 11:3920136-3920136     | intron_variant                  | MODIFIER | Tcn2     | ENSMUSG00000020432 | Transcript        | ENSMUST00000109989 | protein coding          | -           |
| 11:3920136-3920136     | intron_variant                  | MODIFIER | Tcn2     | ENSMUSG00000020432 | Transcript        | ENSMUST00000109990 | protein coding          | -           |
| 11:3920136-3920136     | intron variant                  | MODIFIER | Tcn2     | ENSMUSG00000020432 | Transcript        | ENSMUST00000109991 | protein coding          | -           |
| 11:3920136-3920136     | intron variant                  | MODIFIER | Tcn2     | ENSMUSG00000020432 | Transcript        | ENSMUST00000109992 | protein coding          | -           |
| 11:3920136-3920136     | intron variant                  | MODIFIER | Tcn2     | ENSMUSG00000020432 | Transcript        | ENSMUST00000109993 | protein coding          | -           |
| 11:53399900-53399900   | frameshift_variant              | HIGH     | Aff4     | ENSMUSG00000049470 | Transcript        | ENSMUST00000060945 | protein coding          | -           |
| 11:53399900-53399900   | downstream_gene_variant         | MODIFIER | Aff4     | ENSMUSG00000049470 | Transcript        | ENSMUST00000130152 | processed transcript    | -           |
| 11:53399900-53399900   | downstream_gene_variant         | MODIFIER | Aff4     | ENSMUSG00000049470 | Transcript        | ENSMUST00000152616 | protein coding          | -           |
| 11:53399900-53399900   | upstream gene variant           | MODIFIER | Aff4     | ENSMUSG00000049470 | Transcript        | ENSMUST00000154499 | retained_intron         | -           |
| 11:79944351-79944351   | intron variant                  | MODIFIER | Utp6     | ENSMUSG00000035575 | Transcript        | ENSMUST00000043152 | protein coding          | -           |
| 11:79944351-79944351   | intron variant                  | MODIFIER | Utp6     | ENSMUSG00000035575 | Transcript        | ENSMUST00000108241 | protein coding          | -           |
| 11:79944351-79944351   | upstream gene variant           | MODIFIER | Utp6     | ENSMUSG00000035575 | Transcript        | ENSMUST00000131921 | retained_intron         | -           |
| 12:113879380-113879380 | synonymous_variant              | LOW      | Ighv2-9  | ENSMUSG00000096638 | Transcript        | ENSMUST00000103451 | IG_V_gene               | -           |
| 12:113879380-113879380 | upstream_gene_variant           | MODIFIER | Ighv5-18 | ENSMUSG00000103893 | Transcript        | ENSMUST00000193834 | IG_V_pseudogene         | -           |
| 12:113879380-113879380 | upstream_gene_variant           | MODIFIER | Ighv2-8  | ENSMUSG00000102878 | Transcript        | ENSMUST00000193935 | IG_V_pseudogene         | -           |
| 12:113879380-113879380 | regulatory region variant       | MODIFIER | -        | -                  | RegulatoryFeature | ENSMUSR00000335516 | CTCF binding site       | -           |
| 12:113896566-113896566 | missense variant                | MODERATE | Ighv7-1  | ENSMUSG00000076665 | Transcript        | ENSMUST00000103474 | IG_V_gene               | -           |
| 12:113896566-113896566 | regulatory region variant       | MODIFIER | -        | -                  | RegulatoryFeature | ENSMUSR00000335518 | CTCF binding site       | -           |
| 12:115848145-115848145 | synonymous_variant              | LOW      | Ighv1-76 | ENSMUSG00000093896 | Transcript        | ENSMUST00000169155 | IG_V_gene               | -           |
| 12:115848145-115848145 | synonymous_variant              | LOW      | Ighv1-76 | ENSMUSG00000093896 | Transcript        | ENSMUST00000197537 | IG_V_gene               | -           |
| 12:115848145-115848145 | upstream_gene_variant           | MODIFIER | Ighv8-15 | ENSMUSG00000104542 | Transcript        | ENSMUST00000197770 | IG_V_pseudogene         | -           |
| 12:26326424-26326424   | intron variant                  | MODIFIER | Rnf144a  | ENSMUSG00000020642 | Transcript        | ENSMUST00000020971 | protein coding          | rs47376046  |
| 12:26326424-26326424   | intron variant                  | MODIFIER | Rnf144a  | ENSMUSG00000020642 | Transcript        | ENSMUST00000062149 | protein coding          | rs47376046  |
| 12:26326424-26326424   | intron variant                  | MODIFIER | Rnf144a  | ENSMUSG00000020642 | Transcript        | ENSMUST00000222082 | protein coding          | rs47376046  |
| 12:26471162-26471162   | intron variant                  | MODIFIER | Cmpk2    | ENSMUSG00000020638 | Transcript        | ENSMUST00000020969 | protein coding          | rs48163592  |
| 12:26471162-26471162   | non_coding_transcript_exon_var  | MODIFIER | Cmpk2    | ENSMUSG00000020638 | Transcript        | ENSMUST00000020466 | processed transcript    | rs48163592  |
| 12:26471162-26471162   | upstream_gene_variant           | MODIFIER | Cmpk2    | ENSMUSG00000020638 | Transcript        | ENSMUST00000221060 | retained_intron         | rs48163592  |
| 12:26471162-26471162   | non_coding_transcript_exon_var  | MODIFIER | Cmpk2    | ENSMUSG00000020638 | Transcript        | ENSMUST00000221826 | retained_intron         | rs48163592  |



|                      |                                 |          |            |                     |                   |                     |                         |              |
|----------------------|---------------------------------|----------|------------|---------------------|-------------------|---------------------|-------------------------|--------------|
| 12:26471162-26471162 | regulatory region variant       | MODIFIER | -          | -                   | RegulatoryFeature | ENSMUSR00000057227  | promoter                | rs48163592   |
| 12:28634415-28634415 | intron_variant                  | MODIFIER | Rps7       | ENSMUSG00000061477  | Transcript        | ENSMUST00000074267  | protein_coding          | rs50750970   |
| 12:28634415-28634415 | intron_variant,non_coding_trans | MODIFIER | Rps7       | ENSMUSG00000061477  | Transcript        | ENSMUST00000220860  | retained_intron         | rs50750970   |
| 12:28634415-28634415 | intron_variant                  | MODIFIER | Rps7       | ENSMUSG00000061477  | Transcript        | ENSMUST00000221871  | protein_coding          | rs50750970   |
| 12:28634415-28634415 | downstream gene variant         | MODIFIER | Rps7       | ENSMUSG00000061477  | Transcript        | ENSMUST00000222228  | retained_intron         | rs50750970   |
| 12:28634415-28634415 | upstream gene variant           | MODIFIER | Rps7       | ENSMUSG00000061477  | Transcript        | ENSMUST00000222808  | retained_intron         | rs50750970   |
| 12:28634415-28634415 | upstream gene variant           | MODIFIER | Rps7       | ENSMUSG00000061477  | Transcript        | ENSMUST00000223153  | retained_intron         | rs50750970   |
| 12:28634415-28634415 | upstream_gene_variant           | MODIFIER | Rps7       | ENSMUSG00000061477  | Transcript        | ENSMUST00000223318  | processed_transcript    | rs50750970   |
| 12:28634415-28634415 | regulatory_region_variant       | MODIFIER | -          | -                   | RegulatoryFeature | ENSMUSR00000057345  | promoter                | rs50750970   |
| 12:28658700-28658700 | intron_variant                  | MODIFIER | Rnaseh1    | ENSMUSG00000020630  | Transcript        | ENSMUST00000020959  | protein_coding          | rs48968014   |
| 12:28658700-28658700 | intron_variant,non_coding_trans | MODIFIER | Rnaseh1    | ENSMUSG00000020630  | Transcript        | ENSMUST00000221496  | retained_intron         | rs48968014   |
| 12:28658700-28658700 | downstream gene variant         | MODIFIER | Rnaseh1    | ENSMUSG00000020630  | Transcript        | ENSMUST00000222767  | retained_intron         | rs48968014   |
| 12:28658700-28658700 | intron variant,NMD transcript v | MODIFIER | Rnaseh1    | ENSMUSG00000020630  | Transcript        | ENSMUST00000223322  | nonsense mediated decay | rs48968014   |
| 12:28856099-28856099 | intron variant,NMD transcript v | MODIFIER | Eipr1      | ENSMUSG00000036613  | Transcript        | ENSMUST00000035657  | nonsense mediated decay | rs47296512   |
| 12:28856099-28856099 | intron_variant                  | MODIFIER | Eipr1      | ENSMUSG00000036613  | Transcript        | ENSMUST00000221555  | protein_coding          | rs47296512   |
| 12:28856099-28856099 | upstream_gene_variant           | MODIFIER | Eipr1      | ENSMUSG00000036613  | Transcript        | ENSMUST00000221574  | processed_transcript    | rs47296512   |
| 12:28856099-28856099 | intron_variant                  | MODIFIER | Eipr1      | ENSMUSG00000036613  | Transcript        | ENSMUST00000221877  | protein_coding          | rs47296512   |
| 12:32033121-32033121 | intron_variant                  | MODIFIER | Prkar2b    | ENSMUSG00000002997  | Transcript        | ENSMUST00000003079  | protein_coding          | rs29221895   |
| 12:32033121-32033121 | intron variant                  | MODIFIER | Prkar2b    | ENSMUSG00000002997  | Transcript        | ENSMUST000000036497 | protein_coding          | rs29221895   |
| 12:32033121-32033121 | intron variant                  | MODIFIER | Prkar2b    | ENSMUSG00000002997  | Transcript        | ENSMUST00000146865  | protein_coding          | rs29221895   |
| 12:32847944-32847944 | intron_variant                  | MODIFIER | Nampt      | ENSMUSG00000020572  | Transcript        | ENSMUST00000020886  | protein_coding          | rs50780349   |
| 12:33365082-33365082 | intron_variant                  | MODIFIER | Atxn711    | ENSMUSG00000020564  | Transcript        | ENSMUST00000090597  | protein_coding          | rs29180657   |
| 12:33365082-33365082 | intron_variant                  | MODIFIER | Atxn711    | ENSMUSG00000020564  | Transcript        | ENSMUST00000125192  | protein_coding          | rs29180657   |
| 12:33365082-33365082 | intron variant,non_coding_trans | MODIFIER | Atxn711    | ENSMUSG00000020564  | Transcript        | ENSMUST00000126275  | retained_intron         | rs29180657   |
| 12:33365082-33365082 | intron variant,non_coding_trans | MODIFIER | Atxn711os2 | ENSMUSG00000085664  | Transcript        | ENSMUST00000138617  | antisense               | rs29180657   |
| 12:33365082-33365082 | upstream gene variant           | MODIFIER | Atxn711    | ENSMUSG00000020564  | Transcript        | ENSMUST00000142184  | processed_transcript    | rs29180657   |
| 12:33365082-33365082 | intron variant                  | MODIFIER | Atxn711    | ENSMUSG00000020564  | Transcript        | ENSMUST00000146404  | protein_coding          | rs29180657   |
| 12:33365082-33365082 | intron_variant                  | MODIFIER | Atxn711    | ENSMUSG00000020564  | Transcript        | ENSMUST00000154742  | protein_coding          | rs29180657   |
| 12:34047933-34047934 | downstream_gene_variant         | MODIFIER | Hdac9      | ENSMUSG00000004698  | Transcript        | ENSMUST00000209750  | protein_coding          | rs1131802444 |
| 12:34047933-34047934 | 3_prime_UTR_variant             | MODIFIER | Hdac9      | ENSMUSG00000004698  | Transcript        | ENSMUST00000209902  | protein_coding          | rs1131802444 |
| 12:34047933-34047934 | downstream gene variant         | MODIFIER | Hdac9      | ENSMUSG00000004698  | Transcript        | ENSMUST00000209990  | protein_coding          | rs1131802444 |
| 12:34048381-34048382 | downstream gene variant         | MODIFIER | Hdac9      | ENSMUSG00000004698  | Transcript        | ENSMUST00000209750  | protein_coding          | -            |
| 12:34048381-34048382 | 3 prime UTR variant             | MODIFIER | Hdac9      | ENSMUSG00000004698  | Transcript        | ENSMUST00000209902  | protein_coding          | -            |
| 12:34048381-34048382 | downstream_gene_variant         | MODIFIER | Hdac9      | ENSMUSG00000004698  | Transcript        | ENSMUST00000209990  | protein_coding          | -            |
| 12:35139784-35139784 | intron_variant                  | MODIFIER | Snx13      | ENSMUSG00000020590  | Transcript        | ENSMUST000000048519 | protein_coding          | rs46642947   |
| 12:35139784-35139784 | intron_variant,non_coding_trans | MODIFIER | Snx13      | ENSMUSG00000020590  | Transcript        | ENSMUST00000221876  | processed_transcript    | rs46642947   |
| 12:35139784-35139784 | upstream gene variant           | MODIFIER | Gm48137    | ENSMUSG000000113571 | Transcript        | ENSMUST00000223056  | TEC                     | rs46642947   |
| 12:35499737-35499737 | 3 prime UTR variant             | MODIFIER | Ahr        | ENSMUSG00000019256  | Transcript        | ENSMUST00000116436  | protein_coding          | rs3021586    |
| 12:40321187-40321187 | intron variant                  | MODIFIER | Zfp277     | ENSMUSG00000055917  | Transcript        | ENSMUST00000069637  | protein_coding          | rs29212682   |
| 12:40321187-40321187 | intron variant                  | MODIFIER | Zfp277     | ENSMUSG00000055917  | Transcript        | ENSMUST00000069692  | protein_coding          | rs29212682   |
| 12:40321187-40321187 | non_coding_transcript_exon_var  | MODIFIER | Zfp277     | ENSMUSG00000055917  | Transcript        | ENSMUST00000221604  | retained_intron         | rs29212682   |
| 12:40321187-40321187 | downstream_gene_variant         | MODIFIER | Zfp277     | ENSMUSG00000055917  | Transcript        | ENSMUST00000223394  | retained_intron         | rs29212682   |
| 12:40321264-40321264 | intron_variant                  | MODIFIER | Zfp277     | ENSMUSG00000055917  | Transcript        | ENSMUST00000069637  | protein_coding          | rs50250906   |
| 12:40321264-40321264 | intron variant                  | MODIFIER | Zfp277     | ENSMUSG00000055917  | Transcript        | ENSMUST00000069692  | protein_coding          | rs50250906   |
| 12:40321264-40321264 | non_coding_transcript_exon_var  | MODIFIER | Zfp277     | ENSMUSG00000055917  | Transcript        | ENSMUST00000221604  | retained_intron         | rs50250906   |
| 12:40321264-40321264 | downstream gene variant         | MODIFIER | Zfp277     | ENSMUSG00000055917  | Transcript        | ENSMUST00000223394  | retained_intron         | rs50250906   |
| 12:40321604-40321604 | intron_variant                  | MODIFIER | Zfp277     | ENSMUSG00000055917  | Transcript        | ENSMUST00000069637  | protein_coding          | rs228099868  |
| 12:40321604-40321604 | intron_variant                  | MODIFIER | Zfp277     | ENSMUSG00000055917  | Transcript        | ENSMUST00000069692  | protein_coding          | rs228099868  |
| 12:40321604-40321604 | non_coding_transcript_exon_var  | MODIFIER | Zfp277     | ENSMUSG00000055917  | Transcript        | ENSMUST00000221604  | retained_intron         | rs228099868  |
| 12:40321604-40321604 | downstream gene variant         | MODIFIER | Zfp277     | ENSMUSG00000055917  | Transcript        | ENSMUST00000223394  | retained_intron         | rs228099868  |
| 12:40321609-40321609 | intron variant                  | MODIFIER | Zfp277     | ENSMUSG00000055917  | Transcript        | ENSMUST00000069637  | protein_coding          | rs248350135  |
| 12:40321609-40321609 | intron variant                  | MODIFIER | Zfp277     | ENSMUSG00000055917  | Transcript        | ENSMUST00000069692  | protein_coding          | rs248350135  |
| 12:40321609-40321609 | non_coding_transcript_exon_var  | MODIFIER | Zfp277     | ENSMUSG00000055917  | Transcript        | ENSMUST00000221604  | retained_intron         | rs248350135  |
| 12:40321609-40321609 | downstream_gene_variant         | MODIFIER | Zfp277     | ENSMUSG00000055917  | Transcript        | ENSMUST00000223394  | retained_intron         | rs248350135  |
| 12:40321801-40321801 | intron_variant                  | MODIFIER | Zfp277     | ENSMUSG00000055917  | Transcript        | ENSMUST00000069637  | protein_coding          | rs254505481  |
| 12:40321801-40321801 | intron_variant                  | MODIFIER | Zfp277     | ENSMUSG00000055917  | Transcript        | ENSMUST00000069692  | protein_coding          | rs254505481  |
| 12:40321801-40321801 | non_coding_transcript_exon_var  | MODIFIER | Zfp277     | ENSMUSG00000055917  | Transcript        | ENSMUST00000221604  | retained_intron         | rs254505481  |
| 12:40321801-40321801 | downstream gene variant         | MODIFIER | Zfp277     | ENSMUSG00000055917  | Transcript        | ENSMUST00000223394  | retained_intron         | rs254505481  |
| 12:40322472-40322472 | intron variant                  | MODIFIER | Zfp277     | ENSMUSG00000055917  | Transcript        | ENSMUST00000069637  | protein_coding          | rs29171582   |
| 12:40322472-40322472 | intron_variant                  | MODIFIER | Zfp277     | ENSMUSG00000055917  | Transcript        | ENSMUST00000069692  | protein_coding          | rs29171582   |
| 12:40322472-40322472 | non_coding_transcript_exon_var  | MODIFIER | Zfp277     | ENSMUSG00000055917  | Transcript        | ENSMUST00000221604  | retained_intron         | rs29171582   |
| 12:40322472-40322472 | downstream_gene_variant         | MODIFIER | Zfp277     | ENSMUSG00000055917  | Transcript        | ENSMUST00000223394  | retained_intron         | rs29171582   |
| 12:40672844-40672844 | synonymous variant              | LOW      | Dock4      | ENSMUSG00000035954  | Transcript        | ENSMUST00000037488  | protein_coding          | rs47722120   |
| 12:40672844-40672844 | synonymous variant              | LOW      | Dock4      | ENSMUSG00000035954  | Transcript        | ENSMUST00000220912  | protein_coding          | rs47722120   |
| 12:40672844-40672844 | non_coding_transcript_exon_var  | MODIFIER | Dock4      | ENSMUSG00000035954  | Transcript        | ENSMUST00000221758  | retained_intron         | rs47722120   |
| 12:40672844-40672844 | non_coding_transcript_exon_var  | MODIFIER | Dock4      | ENSMUSG00000035954  | Transcript        | ENSMUST00000222287  | retained_intron         | rs47722120   |
| 12:4239002-4239003   | upstream_gene_variant           | MODIFIER | Cenpo      | ENSMUSG00000020652  | Transcript        | ENSMUST00000140975  | protein_coding          | rs387695635  |
| 12:4239002-4239003   | 3_prime_UTR_variant             | MODIFIER | Pthrhd1    | ENSMUSG00000096199  | Transcript        | ENSMUST00000179139  | protein_coding          | rs387695635  |
| 12:4239002-4239003   | downstream_gene_variant         | MODIFIER | Gm29696    | ENSMUSG000000112829 | Transcript        | ENSMUST00000219209  | processed_pseudogene    | rs387695635  |

|                      |                                 |          |               |                    |                   |                    |                          |             |
|----------------------|---------------------------------|----------|---------------|--------------------|-------------------|--------------------|--------------------------|-------------|
| 12:4239002-4239003   | upstream gene variant           | MODIFIER | 4921501109Rik | ENSMUSG00000111916 | Transcript        | ENSMUST00000220337 | antisense                | rs387695635 |
| 12:51364684-51364684 | intron_variant                  | MODIFIER | G2e3          | ENSMUSG00000035293 | Transcript        | ENSMUST00000054308 | protein_coding           | rs51985107  |
| 12:51364684-51364684 | intron_variant                  | MODIFIER | G2e3          | ENSMUSG00000035293 | Transcript        | ENSMUST00000119211 | protein_coding           | rs51985107  |
| 12:51364684-51364684 | intron_variant                  | MODIFIER | G2e3          | ENSMUSG00000035293 | Transcript        | ENSMUST00000121521 | protein_coding           | rs51985107  |
| 12:51364684-51364684 | downstream gene variant         | MODIFIER | G2e3          | ENSMUSG00000035293 | Transcript        | ENSMUST00000144767 | retained_intron          | rs51985107  |
| 12:51365873-51365873 | intron_variant                  | MODIFIER | G2e3          | ENSMUSG00000035293 | Transcript        | ENSMUST00000054308 | protein_coding           | rs262181154 |
| 12:51365873-51365873 | intron_variant                  | MODIFIER | G2e3          | ENSMUSG00000035293 | Transcript        | ENSMUST00000119211 | protein_coding           | rs262181154 |
| 12:51365873-51365873 | intron_variant                  | MODIFIER | G2e3          | ENSMUSG00000035293 | Transcript        | ENSMUST00000121521 | protein_coding           | rs262181154 |
| 12:51365873-51365873 | downstream_gene_variant         | MODIFIER | G2e3          | ENSMUSG00000035293 | Transcript        | ENSMUST00000144767 | retained_intron          | rs262181154 |
| 12:51365873-51365873 | upstream_gene_variant           | MODIFIER | G2e3          | ENSMUSG00000035293 | Transcript        | ENSMUST00000152236 | retained_intron          | rs262181154 |
| 12:51373038-51373041 | upstream gene variant           | MODIFIER | Scfd1         | ENSMUSG00000020952 | Transcript        | ENSMUST00000021335 | protein_coding           | rs221509553 |
| 12:51373038-51373041 | 3 prime UTR variant             | MODIFIER | G2e3          | ENSMUSG00000035293 | Transcript        | ENSMUST00000054308 | protein_coding           | rs221509553 |
| 12:51373038-51373041 | 3 prime UTR variant             | MODIFIER | G2e3          | ENSMUSG00000035293 | Transcript        | ENSMUST00000119211 | protein_coding           | rs221509553 |
| 12:51373038-51373041 | 3 prime UTR variant             | MODIFIER | G2e3          | ENSMUSG00000035293 | Transcript        | ENSMUST00000121521 | protein_coding           | rs221509553 |
| 12:51373038-51373041 | non_coding_transcript_exon_var  | MODIFIER | G2e3          | ENSMUSG00000035293 | Transcript        | ENSMUST00000152236 | retained_intron          | rs221509553 |
| 12:51373038-51373041 | upstream_gene_variant           | MODIFIER | Scfd1         | ENSMUSG00000020952 | Transcript        | ENSMUST00000218131 | retained_intron          | rs221509553 |
| 12:51373038-51373041 | upstream_gene_variant           | MODIFIER | Scfd1         | ENSMUSG00000020952 | Transcript        | ENSMUST00000219264 | retained_intron          | rs221509553 |
| 12:51373038-51373041 | upstream gene variant           | MODIFIER | Scfd1         | ENSMUSG00000020952 | Transcript        | ENSMUST00000219434 | protein_coding           | rs221509553 |
| 12:51373038-51373041 | upstream gene variant           | MODIFIER | Scfd1         | ENSMUSG00000020952 | Transcript        | ENSMUST00000219799 | retained_intron          | rs221509553 |
| 12:51444090-51444090 | intron variant                  | MODIFIER | Scfd1         | ENSMUSG00000020952 | Transcript        | ENSMUST0000021335  | protein_coding           | rs29185499  |
| 12:51444090-51444090 | intron_variant,NMD_transcript_v | MODIFIER | Scfd1         | ENSMUSG00000020952 | Transcript        | ENSMUST00000218138 | nonsense_mediated_decay  | rs29185499  |
| 12:51444090-51444090 | downstream_gene_variant         | MODIFIER | Scfd1         | ENSMUSG00000020952 | Transcript        | ENSMUST00000219686 | retained_intron          | rs29185499  |
| 12:51593770-51593770 | missense_variant                | MODERATE | Coch          | ENSMUSG00000020953 | Transcript        | ENSMUST00000085412 | protein_coding           | rs51488430  |
| 12:51593770-51593770 | missense variant                | MODERATE | Coch          | ENSMUSG00000020953 | Transcript        | ENSMUST00000164782 | protein_coding           | rs51488430  |
| 12:51593770-51593770 | non coding transcript exon var  | MODIFIER | Coch          | ENSMUSG00000020953 | Transcript        | ENSMUST00000218382 | retained_intron          | rs51488430  |
| 12:51593770-51593770 | non coding transcript exon var  | MODIFIER | Coch          | ENSMUSG00000020953 | Transcript        | ENSMUST00000220173 | retained_intron          | rs51488430  |
| 12:51593770-51593770 | regulatory region variant       | MODIFIER | -             | ENSMUSG00000020953 | RegulatoryFeature | ENSMUSR00000533198 | promoter                 | rs51488430  |
| 12:51595483-51595483 | synonymous_variant              | LOW      | Coch          | ENSMUSG00000020953 | Transcript        | ENSMUST00000085412 | protein_coding           | rs29206368  |
| 12:51595483-51595483 | synonymous_variant              | LOW      | Coch          | ENSMUSG00000020953 | Transcript        | ENSMUST00000164782 | protein_coding           | rs29206368  |
| 12:51595483-51595483 | downstream_gene_variant         | MODIFIER | Coch          | ENSMUSG00000020953 | Transcript        | ENSMUST00000218382 | retained_intron          | rs29206368  |
| 12:51595483-51595483 | downstream gene variant         | MODIFIER | Coch          | ENSMUSG00000020953 | Transcript        | ENSMUST00000220173 | retained_intron          | rs29206368  |
| 12:51598285-51598285 | synonymous variant              | LOW      | Coch          | ENSMUSG00000020953 | Transcript        | ENSMUST00000085412 | protein_coding           | rs108185983 |
| 12:51598285-51598285 | synonymous variant              | LOW      | Coch          | ENSMUSG00000020953 | Transcript        | ENSMUST00000164782 | protein_coding           | rs108185983 |
| 12:51598285-51598285 | downstream_gene_variant         | MODIFIER | Coch          | ENSMUSG00000020953 | Transcript        | ENSMUST00000218382 | retained_intron          | rs108185983 |
| 12:51598285-51598285 | downstream_gene_variant         | MODIFIER | Coch          | ENSMUSG00000020953 | Transcript        | ENSMUST00000220173 | retained_intron          | rs108185983 |
| 12:51603510-51603510 | synonymous_variant              | LOW      | Coch          | ENSMUSG00000020953 | Transcript        | ENSMUST00000085412 | protein_coding           | rs46683073  |
| 12:51603510-51603510 | synonymous variant              | LOW      | Coch          | ENSMUSG00000020953 | Transcript        | ENSMUST00000164782 | protein_coding           | rs46683073  |
| 12:51605034-51605034 | downstream gene variant         | MODIFIER | Strn3         | ENSMUSG00000020954 | Transcript        | ENSMUST00000013130 | protein_coding           | rs6305027   |
| 12:51605034-51605034 | 3 prime UTR variant             | MODIFIER | Coch          | ENSMUSG00000020953 | Transcript        | ENSMUST00000085412 | protein_coding           | rs6305027   |
| 12:51605034-51605034 | 3 prime UTR variant             | MODIFIER | Coch          | ENSMUSG00000020953 | Transcript        | ENSMUST00000164782 | protein_coding           | rs6305027   |
| 12:51605034-51605034 | downstream_gene_variant         | MODIFIER | Strn3         | ENSMUSG00000020954 | Transcript        | ENSMUST00000169503 | protein_coding           | rs6305027   |
| 12:51605135-51605135 | downstream_gene_variant         | MODIFIER | Strn3         | ENSMUSG00000020954 | Transcript        | ENSMUST00000013130 | protein_coding           | rs6317623   |
| 12:51605135-51605135 | 3_prime_UTR_variant             | MODIFIER | Coch          | ENSMUSG00000020953 | Transcript        | ENSMUST00000085412 | protein_coding           | rs6317623   |
| 12:51605135-51605135 | 3 prime UTR variant             | MODIFIER | Coch          | ENSMUSG00000020953 | Transcript        | ENSMUST00000164782 | protein_coding           | rs6317623   |
| 12:51605135-51605135 | downstream gene variant         | MODIFIER | Strn3         | ENSMUSG00000020954 | Transcript        | ENSMUST00000169503 | protein_coding           | rs6317623   |
| 12:51605406-51605406 | downstream gene variant         | MODIFIER | Strn3         | ENSMUSG00000020954 | Transcript        | ENSMUST00000013130 | protein_coding           | rs48556992  |
| 12:51605406-51605406 | 3_prime_UTR_variant             | MODIFIER | Coch          | ENSMUSG00000020953 | Transcript        | ENSMUST00000085412 | protein_coding           | rs48556992  |
| 12:51605406-51605406 | 3_prime_UTR_variant             | MODIFIER | Coch          | ENSMUSG00000020953 | Transcript        | ENSMUST00000164782 | protein_coding           | rs48556992  |
| 12:51605406-51605406 | downstream_gene_variant         | MODIFIER | Strn3         | ENSMUSG00000020954 | Transcript        | ENSMUST00000169503 | protein_coding           | rs49914855  |
| 12:51605503-51605503 | downstream gene variant         | MODIFIER | Strn3         | ENSMUSG00000020954 | Transcript        | ENSMUST00000013130 | protein_coding           | rs49914855  |
| 12:51605503-51605503 | 3 prime UTR variant             | MODIFIER | Coch          | ENSMUSG00000020953 | Transcript        | ENSMUST00000085412 | protein_coding           | rs49914855  |
| 12:51605503-51605503 | 3 prime UTR variant             | MODIFIER | Coch          | ENSMUSG00000020953 | Transcript        | ENSMUST00000164782 | protein_coding           | rs49914855  |
| 12:51605503-51605503 | downstream gene variant         | MODIFIER | Strn3         | ENSMUSG00000020954 | Transcript        | ENSMUST00000169503 | protein_coding           | rs49914855  |
| 12:51605691-51605691 | downstream_gene_variant         | MODIFIER | Strn3         | ENSMUSG00000020954 | Transcript        | ENSMUST00000013130 | protein_coding           | rs29487849  |
| 12:51605691-51605691 | 3_prime_UTR_variant             | MODIFIER | Coch          | ENSMUSG00000020953 | Transcript        | ENSMUST00000085412 | protein_coding           | rs29487849  |
| 12:51605691-51605691 | 3_prime_UTR_variant             | MODIFIER | Coch          | ENSMUSG00000020953 | Transcript        | ENSMUST00000164782 | protein_coding           | rs29487849  |
| 12:51605691-51605691 | downstream gene variant         | MODIFIER | Strn3         | ENSMUSG00000020954 | Transcript        | ENSMUST00000169503 | protein_coding           | rs29487849  |
| 12:51833358-51833358 | upstream gene variant           | MODIFIER | Hectd1        | ENSMUSG00000035247 | Transcript        | ENSMUST00000042052 | protein_coding           | rs223086520 |
| 12:51833358-51833358 | upstream gene variant           | MODIFIER | Hectd1        | ENSMUSG00000035247 | Transcript        | ENSMUST00000179265 | protein_coding           | rs223086520 |
| 12:51833358-51833358 | upstream_gene_variant           | MODIFIER | Hectd1        | ENSMUSG00000035247 | Transcript        | ENSMUST00000217804 | retained_intron          | rs223086520 |
| 12:51885286-51885286 | intron_variant                  | MODIFIER | Heatr5a       | ENSMUSG00000035181 | Transcript        | ENSMUST00000040583 | protein_coding           | rs29149242  |
| 12:51885286-51885286 | upstream_gene_variant           | MODIFIER | Gm26517       | ENSMUSG00000091759 | Transcript        | ENSMUST00000181279 | lincRNA                  | rs29149242  |
| 12:51885286-51885286 | downstream gene variant         | MODIFIER | Heatr5a       | ENSMUSG00000035181 | Transcript        | ENSMUST00000218847 | retained_intron          | rs29149242  |
| 12:51885286-51885286 | intron_variant,non coding trans | MODIFIER | Heatr5a       | ENSMUSG00000035181 | Transcript        | ENSMUST00000220369 | retained_intron          | rs29149242  |
| 12:51886298-51886298 | intron variant                  | MODIFIER | Heatr5a       | ENSMUSG00000035181 | Transcript        | ENSMUST00000040583 | protein_coding           | rs3710688   |
| 12:51886298-51886298 | upstream gene variant           | MODIFIER | Gm26517       | ENSMUSG00000091759 | Transcript        | ENSMUST00000181279 | lincRNA                  | rs3710688   |
| 12:51886298-51886298 | downstream_gene_variant         | MODIFIER | Heatr5a       | ENSMUSG00000035181 | Transcript        | ENSMUST00000218847 | retained_intron          | rs3710688   |
| 12:51886298-51886298 | intron_variant,non coding_trans | MODIFIER | Heatr5a       | ENSMUSG00000035181 | Transcript        | ENSMUST00000220369 | retained_intron          | rs3710688   |
| 12:51886298-51886298 | regulatory_region_variant       | MODIFIER | -             | -                  | RegulatoryFeature | ENSMUSR00000533256 | promoter_flanking_region | rs3710688   |

|                      |                                 |          |               |                     |                   |                     |                          |             |
|----------------------|---------------------------------|----------|---------------|---------------------|-------------------|---------------------|--------------------------|-------------|
| 12:51886682-51886682 | intron variant                  | MODIFIER | Heatr5a       | ENSMUSG00000035181  | Transcript        | ENSMUST00000040583  | protein coding           | rs248084547 |
| 12:51886682-51886682 | upstream_gene_variant           | MODIFIER | Gm26517       | ENSMUSG000000097159 | Transcript        | ENSMUST00000181279  | lincRNA                  | rs248084547 |
| 12:51886682-51886682 | downstream_gene_variant         | MODIFIER | Heatr5a       | ENSMUSG00000035181  | Transcript        | ENSMUST00000218847  | retained_intron          | rs248084547 |
| 12:51886682-51886682 | intron_variant,non_coding_trans | MODIFIER | Heatr5a       | ENSMUSG00000035181  | Transcript        | ENSMUST00000220369  | retained_intron          | rs248084547 |
| 12:51886682-51886682 | regulatory_region_variant       | MODIFIER | -             | -                   | RegulatoryFeature | ENSMUSR000000533256 | promoter_flanking_region | rs248084547 |
| 12:51889316-51889316 | intron variant                  | MODIFIER | Heatr5a       | ENSMUSG00000035181  | Transcript        | ENSMUST00000040583  | protein coding           | rs29129796  |
| 12:51889316-51889316 | non coding transcript exon var  | MODIFIER | Gm26517       | ENSMUSG00000097159  | Transcript        | ENSMUST00000181279  | lincRNA                  | rs29129796  |
| 12:51889316-51889316 | upstream_gene_variant           | MODIFIER | Heatr5a       | ENSMUSG00000035181  | Transcript        | ENSMUST00000218847  | retained_intron          | rs29129796  |
| 12:51889316-51889316 | intron_variant,non_coding_trans | MODIFIER | Heatr5a       | ENSMUSG00000035181  | Transcript        | ENSMUST00000220369  | retained_intron          | rs29129796  |
| 12:51959102-51959102 | intron_variant                  | MODIFIER | Heatr5a       | ENSMUSG00000035181  | Transcript        | ENSMUST00000040583  | protein coding           | rs46053728  |
| 12:51959102-51959102 | intron variant,non_coding_trans | MODIFIER | Heatr5a       | ENSMUSG00000035181  | Transcript        | ENSMUST00000218254  | retained_intron          | rs46053728  |
| 12:51959303-51959303 | intron variant                  | MODIFIER | Heatr5a       | ENSMUSG00000035181  | Transcript        | ENSMUST00000040583  | protein coding           | rs216885560 |
| 12:51959303-51959303 | intron variant,non_coding_trans | MODIFIER | Heatr5a       | ENSMUSG00000035181  | Transcript        | ENSMUST00000218254  | retained_intron          | rs216885560 |
| 12:51959402-51959402 | intron variant                  | MODIFIER | Heatr5a       | ENSMUSG00000035181  | Transcript        | ENSMUST00000040583  | protein coding           | rs50191425  |
| 12:51959402-51959402 | intron_variant,non_coding_trans | MODIFIER | Heatr5a       | ENSMUSG00000035181  | Transcript        | ENSMUST00000218254  | retained_intron          | rs50191425  |
| 12:53450295-53450295 | intron_variant                  | MODIFIER | Npas3         | ENSMUSG00000021010  | Transcript        | ENSMUST00000101432  | protein coding           | rs6270967   |
| 12:53450295-53450295 | intron_variant                  | MODIFIER | Npas3         | ENSMUSG00000021010  | Transcript        | ENSMUST00000220986  | protein coding           | rs6270967   |
| 12:53450295-53450295 | intron variant                  | MODIFIER | Npas3         | ENSMUSG00000021010  | Transcript        | ENSMUST00000223057  | protein coding           | rs6270967   |
| 12:53450295-53450295 | intron variant                  | MODIFIER | Npas3         | ENSMUSG00000021010  | Transcript        | ENSMUST00000223358  | protein coding           | rs6270967   |
| 12:53501122-53501122 | synonymous variant              | LOW      | Npas3         | ENSMUSG00000021010  | Transcript        | ENSMUST00000101432  | protein coding           | rs49025284  |
| 12:53501122-53501122 | synonymous_variant              | LOW      | Npas3         | ENSMUSG00000021010  | Transcript        | ENSMUST00000220986  | protein coding           | rs49025284  |
| 12:53501122-53501122 | synonymous_variant              | LOW      | Npas3         | ENSMUSG00000021010  | Transcript        | ENSMUST00000223057  | protein coding           | rs49025284  |
| 12:53501122-53501122 | synonymous_variant              | LOW      | Npas3         | ENSMUSG00000021010  | Transcript        | ENSMUST00000223358  | protein coding           | rs49025284  |
| 12:54048844-54048844 | synonymous variant              | LOW      | Npas3         | ENSMUSG00000021010  | Transcript        | ENSMUST00000101432  | protein coding           | rs31846266  |
| 12:54048844-54048844 | synonymous variant              | LOW      | Npas3         | ENSMUSG00000021010  | Transcript        | ENSMUST00000223057  | protein coding           | rs31846266  |
| 12:54048844-54048844 | synonymous variant              | LOW      | Npas3         | ENSMUSG00000021010  | Transcript        | ENSMUST00000223358  | protein coding           | rs31846266  |
| 12:54067745-54067745 | synonymous variant              | LOW      | Npas3         | ENSMUSG00000021010  | Transcript        | ENSMUST00000101432  | protein coding           | rs29205467  |
| 12:54067745-54067745 | intron_variant,non_coding_trans | MODIFIER | 1700060O08Rik | ENSMUSG00000099407  | Transcript        | ENSMUST00000185390  | antisense                | rs29205467  |
| 12:54067745-54067745 | synonymous_variant              | LOW      | Npas3         | ENSMUSG00000021010  | Transcript        | ENSMUST00000223057  | protein coding           | rs29205467  |
| 12:54067745-54067745 | synonymous_variant              | LOW      | Npas3         | ENSMUSG00000021010  | Transcript        | ENSMUST00000223358  | protein coding           | rs29205467  |
| 12:54067745-54067745 | regulatory_region_variant       | MODIFIER | -             | -                   | RegulatoryFeature | ENSMUSR00000059714  | promoter_flanking_region | rs29205467  |
| 12:54067760-54067760 | synonymous variant              | LOW      | Npas3         | ENSMUSG00000021010  | Transcript        | ENSMUST00000101432  | protein coding           | rs29186598  |
| 12:54067760-54067760 | intron variant,non_coding_trans | MODIFIER | 1700060O08Rik | ENSMUSG00000099407  | Transcript        | ENSMUST00000185390  | antisense                | rs29186598  |
| 12:54067760-54067760 | synonymous_variant              | LOW      | Npas3         | ENSMUSG00000021010  | Transcript        | ENSMUST00000223057  | protein coding           | rs29186598  |
| 12:54067760-54067760 | synonymous_variant              | LOW      | Npas3         | ENSMUSG00000021010  | Transcript        | ENSMUST00000223358  | protein coding           | rs29186598  |
| 12:54067760-54067760 | regulatory_region_variant       | MODIFIER | -             | -                   | RegulatoryFeature | ENSMUSR00000059714  | promoter_flanking_region | rs29186598  |
| 12:54068897-54068897 | synonymous variant              | LOW      | Npas3         | ENSMUSG00000021010  | Transcript        | ENSMUST00000101432  | protein coding           | rs29126191  |
| 12:54068897-54068897 | intron variant,non_coding_trans | MODIFIER | 1700060O08Rik | ENSMUSG00000099407  | Transcript        | ENSMUST00000185390  | antisense                | rs29126191  |
| 12:54068897-54068897 | synonymous variant              | LOW      | Npas3         | ENSMUSG00000021010  | Transcript        | ENSMUST00000223057  | protein coding           | rs29126191  |
| 12:54068897-54068897 | synonymous variant              | LOW      | Npas3         | ENSMUSG00000021010  | Transcript        | ENSMUST00000223358  | protein coding           | rs29126191  |
| 12:54068897-54068897 | regulatory_region_variant       | MODIFIER | -             | -                   | RegulatoryFeature | ENSMUSR00000059714  | promoter_flanking_region | rs29126191  |
| 12:54069940-54069940 | 3_prime_UTR_variant             | MODIFIER | Npas3         | ENSMUSG00000021010  | Transcript        | ENSMUST00000101432  | protein coding           | rs213093238 |
| 12:54069940-54069940 | intron_variant,non_coding_trans | MODIFIER | 1700060O08Rik | ENSMUSG00000099407  | Transcript        | ENSMUST00000185390  | antisense                | rs213093238 |
| 12:54069940-54069940 | downstream gene variant         | MODIFIER | Npas3         | ENSMUSG00000021010  | Transcript        | ENSMUST00000223057  | protein coding           | rs213093238 |
| 12:54069940-54069940 | downstream gene variant         | MODIFIER | Npas3         | ENSMUSG00000021010  | Transcript        | ENSMUST00000223358  | protein coding           | rs213093238 |
| 12:54070676-54070676 | 3 prime UTR variant             | MODIFIER | Npas3         | ENSMUSG00000021010  | Transcript        | ENSMUST00000101432  | protein coding           | rs29131037  |
| 12:54070676-54070676 | intron_variant,non_coding_trans | MODIFIER | 1700060O08Rik | ENSMUSG00000099407  | Transcript        | ENSMUST00000185390  | antisense                | rs29131037  |
| 12:54070676-54070676 | downstream_gene_variant         | MODIFIER | Npas3         | ENSMUSG00000021010  | Transcript        | ENSMUST00000223057  | protein coding           | rs29131037  |
| 12:54070676-54070676 | downstream_gene_variant         | MODIFIER | Npas3         | ENSMUSG00000021010  | Transcript        | ENSMUST00000223358  | protein coding           | rs29131037  |
| 12:54071422-54071422 | 3 prime UTR variant             | MODIFIER | Npas3         | ENSMUSG00000021010  | Transcript        | ENSMUST00000101432  | protein coding           | rs223330646 |
| 12:54071422-54071422 | intron variant,non_coding_trans | MODIFIER | 1700060O08Rik | ENSMUSG00000099407  | Transcript        | ENSMUST00000185390  | antisense                | rs223330646 |
| 12:54071422-54071422 | downstream gene variant         | MODIFIER | Npas3         | ENSMUSG00000021010  | Transcript        | ENSMUST00000223057  | protein coding           | rs223330646 |
| 12:54071422-54071422 | downstream gene variant         | MODIFIER | Npas3         | ENSMUSG00000021010  | Transcript        | ENSMUST00000223358  | protein coding           | rs223330646 |
| 13:90289706-90289706 | intergenic_variant              | MODIFIER | -             | -                   | -                 | -                   | -                        | -           |
| 14:31381794-31381794 | intron_variant                  | MODIFIER | Sh3bp5        | ENSMUSG00000021892  | Transcript        | ENSMUST00000091903  | protein coding           | rs230349184 |
| 14:31381794-31381794 | intron_variant                  | MODIFIER | Sh3bp5        | ENSMUSG00000021892  | Transcript        | ENSMUST00000100730  | protein coding           | rs230349184 |
| 14:31381794-31381794 | intron variant,NMD transcript v | MODIFIER | Sh3bp5        | ENSMUSG00000021892  | Transcript        | ENSMUST00000140002  | nonsense mediated decay  | rs230349184 |
| 14:31381794-31381794 | intron variant,non_coding_trans | MODIFIER | Sh3bp5        | ENSMUSG00000021892  | Transcript        | ENSMUST00000147586  | processed_transcript     | rs230349184 |
| 14:31381816-31381816 | intron variant                  | MODIFIER | Sh3bp5        | ENSMUSG00000021892  | Transcript        | ENSMUST00000091903  | protein coding           | rs222597081 |
| 14:31381816-31381816 | intron_variant                  | MODIFIER | Sh3bp5        | ENSMUSG00000021892  | Transcript        | ENSMUST00000100730  | protein coding           | rs222597081 |
| 14:31381816-31381816 | intron_variant,NMD_transcript_v | MODIFIER | Sh3bp5        | ENSMUSG00000021892  | Transcript        | ENSMUST00000140002  | nonsense mediated decay  | rs222597081 |
| 14:31381816-31381816 | intron_variant,non_coding_trans | MODIFIER | Sh3bp5        | ENSMUSG00000021892  | Transcript        | ENSMUST00000147586  | processed_transcript     | rs222597081 |
| 14:32182861-32182861 | intron variant                  | MODIFIER | Timm23        | ENSMUSG00000013701  | Transcript        | ENSMUST00000013845  | protein coding           | rs31328711  |
| 14:32182861-32182861 | downstream gene variant         | MODIFIER | Ncoa4         | ENSMUSG00000056234  | Transcript        | ENSMUST00000111994  | protein coding           | rs31328711  |
| 14:32182861-32182861 | downstream gene variant         | MODIFIER | Ncoa4         | ENSMUSG00000056234  | Transcript        | ENSMUST00000163336  | protein coding           | rs31328711  |
| 14:32182861-32182861 | intron variant,NMD transcript v | MODIFIER | Timm23        | ENSMUSG00000013701  | Transcript        | ENSMUST00000163379  | nonsense mediated decay  | rs31328711  |
| 14:32182861-32182861 | intron_variant,non_coding_trans | MODIFIER | Timm23        | ENSMUSG00000013701  | Transcript        | ENSMUST00000168139  | processed_transcript     | rs31328711  |
| 14:32182861-32182861 | downstream_gene_variant         | MODIFIER | Ncoa4         | ENSMUSG00000056234  | Transcript        | ENSMUST00000168334  | nonsense mediated decay  | rs31328711  |
| 14:32182861-32182861 | intron_variant                  | MODIFIER | Timm23        | ENSMUSG00000013701  | Transcript        | ENSMUST00000170331  | protein coding           | rs31328711  |

|                      |                                   |          |               |                    |                   |                    |                          |             |
|----------------------|-----------------------------------|----------|---------------|--------------------|-------------------|--------------------|--------------------------|-------------|
| 14:32182861-32182861 | intronic variant                  | MODIFIER | Timm23        | ENSMUSG00000013701 | Transcript        | ENSMUST00000226683 | protein coding           | rs31328711  |
| 14:32182861-32182861 | downstream_gene_variant           | MODIFIER | Ncoa4         | ENSMUSG00000056234 | Transcript        | ENSMUST00000227112 | processed_transcript     | rs31328711  |
| 14:32298865-32298865 | downstream_gene_variant           | MODIFIER | Parg          | ENSMUSG00000021911 | Transcript        | ENSMUST00000022470 | protein_coding           | rs47613579  |
| 14:32298865-32298865 | downstream_gene_variant           | MODIFIER | Parg          | ENSMUSG00000021911 | Transcript        | ENSMUST00000163350 | protein_coding           | rs47613579  |
| 14:32298865-32298865 | upstream gene variant             | MODIFIER | Gm17210       | ENSMUSG00000090459 | Transcript        | ENSMUST00000169975 | antisense                | rs47613579  |
| 14:32298865-32298865 | downstream gene variant           | MODIFIER | Parg          | ENSMUSG00000021911 | Transcript        | ENSMUST00000170129 | nonsense mediated decay  | rs47613579  |
| 14:32298865-32298865 | downstream gene variant           | MODIFIER | Parg          | ENSMUSG00000021911 | Transcript        | ENSMUST00000170840 | protein coding           | rs47613579  |
| 14:32298865-32298865 | downstream_gene_variant           | MODIFIER | Parg          | ENSMUSG00000021911 | Transcript        | ENSMUST00000171871 | processed_transcript     | rs47613579  |
| 14:32298865-32298865 | downstream_gene_variant           | MODIFIER | Gm48914       | ENSMUSG00000115691 | Transcript        | ENSMUST00000226980 | lincRNA                  | rs47613579  |
| 14:32298865-32298865 | upstream_gene_variant             | MODIFIER | Gm46447       | ENSMUSG00000115813 | Transcript        | ENSMUST00000227042 | lincRNA                  | rs47613579  |
| 14:32752735-32752735 | intergenic variant                | MODIFIER | -             | -                  | -                 | -                  | -                        | rs31044530  |
| 14:32752788-32752788 | intergenic variant                | MODIFIER | -             | -                  | -                 | -                  | -                        | rs31138499  |
| 14:33021384-33021384 | intronic variant                  | MODIFIER | Wdfy4         | ENSMUSG00000051506 | Transcript        | ENSMUST00000061753 | protein coding           | rs46842144  |
| 14:33021384-33021384 | intronic variant                  | MODIFIER | Wdfy4         | ENSMUSG00000051506 | Transcript        | ENSMUST00000130509 | protein coding           | rs46842144  |
| 14:33021384-33021384 | intronic variant                  | MODIFIER | Wdfy4         | ENSMUSG00000051506 | Transcript        | ENSMUST00000132153 | protein_coding           | rs46842144  |
| 14:33380478-33380478 | downstream_gene_variant           | MODIFIER | Mapk8         | ENSMUSG00000021936 | Transcript        | ENSMUST00000022504 | protein_coding           | rs30635546  |
| 14:33380478-33380478 | downstream_gene_variant           | MODIFIER | Mapk8         | ENSMUSG00000021936 | Transcript        | ENSMUST00000111942 | protein_coding           | rs30635546  |
| 14:33380478-33380478 | downstream gene variant           | MODIFIER | Mapk8         | ENSMUSG00000021936 | Transcript        | ENSMUST00000111943 | protein_coding           | rs30635546  |
| 14:33380478-33380478 | downstream gene variant           | MODIFIER | Mapk8         | ENSMUSG00000021936 | Transcript        | ENSMUST00000111944 | protein_coding           | rs30635546  |
| 14:33380478-33380478 | 3 prime UTR variant               | MODIFIER | Mapk8         | ENSMUSG00000021936 | Transcript        | ENSMUST00000111945 | protein_coding           | rs30635546  |
| 14:33380478-33380478 | downstream_gene_variant           | MODIFIER | Mapk8         | ENSMUSG00000021936 | Transcript        | ENSMUST00000127143 | retained_intron          | rs30635546  |
| 14:33380478-33380478 | downstream_gene_variant           | MODIFIER | Mapk8         | ENSMUSG00000021936 | Transcript        | ENSMUST00000150659 | processed_transcript     | rs30635546  |
| 14:34096546-34096546 | synonymous_variant                | LOW      | Anxa8         | ENSMUSG00000021950 | Transcript        | ENSMUST00000022519 | protein_coding           | rs49473125  |
| 14:34096546-34096546 | synonymous_variant                | LOW      | Anxa8         | ENSMUSG00000021950 | Transcript        | ENSMUST00000120077 | protein_coding           | rs49473125  |
| 14:34096546-34096546 | intronic variant                  | MODIFIER | A630023A22Rik | ENSMUSG00000095493 | Transcript        | ENSMUST00000178958 | protein_coding           | rs49473125  |
| 14:34096546-34096546 | intronic variant,non coding trans | MODIFIER | A630023A22Rik | ENSMUSG00000095493 | Transcript        | ENSMUST00000215823 | processed_transcript     | rs49473125  |
| 14:34097883-34097883 | synonymous variant                | LOW      | Anxa8         | ENSMUSG00000021950 | Transcript        | ENSMUST00000022519 | protein_coding           | rs46479886  |
| 14:34097883-34097883 | synonymous_variant                | LOW      | Anxa8         | ENSMUSG00000021950 | Transcript        | ENSMUST00000120077 | protein_coding           | rs46479886  |
| 14:34097883-34097883 | intronic variant                  | MODIFIER | A630023A22Rik | ENSMUSG00000095493 | Transcript        | ENSMUST00000178958 | protein_coding           | rs46479886  |
| 14:34097883-34097883 | intronic variant,non coding trans | MODIFIER | A630023A22Rik | ENSMUSG00000095493 | Transcript        | ENSMUST00000215823 | processed_transcript     | rs46479886  |
| 14:34231585-34231585 | downstream gene variant           | MODIFIER | Syt15         | ENSMUSG00000041479 | Transcript        | ENSMUST00000035351 | protein_coding           | rs48364866  |
| 14:34231585-34231585 | downstream gene variant           | MODIFIER | Syt15         | ENSMUSG00000041479 | Transcript        | ENSMUST00000119693 | protein_coding           | rs48364866  |
| 14:34231585-34231585 | non coding transcript exon var    | MODIFIER | Gm49201       | ENSMUSG00000115124 | Transcript        | ENSMUST00000227403 | lincRNA                  | rs48364866  |
| 14:34231585-34231585 | regulatory_region_variant         | MODIFIER | -             | -                  | RegulatoryFeature | ENSMUSR00000558972 | CTCF_binding_site        | rs48364866  |
| 14:34234983-34234983 | downstream_gene_variant           | MODIFIER | Syt15         | ENSMUSG00000041479 | Transcript        | ENSMUST00000035351 | protein_coding           | rs263565489 |
| 14:34234983-34234983 | downstream_gene_variant           | MODIFIER | Shld2         | ENSMUSG00000041471 | Transcript        | ENSMUST00000111917 | protein_coding           | rs263565489 |
| 14:34234983-34234983 | upstream gene variant             | MODIFIER | Gm49201       | ENSMUSG00000115124 | Transcript        | ENSMUST00000227403 | lincRNA                  | rs263565489 |
| 14:34234983-34234983 | regulatory region variant         | MODIFIER | -             | -                  | RegulatoryFeature | ENSMUSR00000085786 | promoter flanking region | rs263565489 |
| 14:34236575-34236575 | downstream gene variant           | MODIFIER | Shld2         | ENSMUSG00000041471 | Transcript        | ENSMUST00000111917 | protein_coding           | rs214795797 |
| 14:34236575-34236575 | upstream gene variant             | MODIFIER | Gm49201       | ENSMUSG00000115124 | Transcript        | ENSMUST00000227403 | lincRNA                  | rs214795797 |
| 14:34236575-34236575 | downstream_gene_variant           | MODIFIER | Shld2         | ENSMUSG00000041471 | Transcript        | ENSMUST00000228704 | protein_coding           | rs214795797 |
| 14:34314356-34314356 | intronic variant                  | MODIFIER | Glud1         | ENSMUSG00000021794 | Transcript        | ENSMUST00000022322 | protein_coding           | rs50822192  |
| 14:34314356-34314356 | upstream_gene_variant             | MODIFIER | Shld2         | ENSMUSG00000041471 | Transcript        | ENSMUST00000111917 | protein_coding           | rs50822192  |
| 14:34314356-34314356 | upstream gene variant             | MODIFIER | Shld2         | ENSMUSG00000041471 | Transcript        | ENSMUST00000227375 | protein_coding           | rs50822192  |
| 14:34314356-34314356 | upstream gene variant             | MODIFIER | Shld2         | ENSMUSG00000041471 | Transcript        | ENSMUST00000228132 | processed_transcript     | rs50822192  |
| 14:34314356-34314356 | upstream gene variant             | MODIFIER | Shld2         | ENSMUSG00000041471 | Transcript        | ENSMUST00000228704 | protein_coding           | rs50822192  |
| 14:34314356-34314356 | regulatory_region_variant         | MODIFIER | -             | -                  | RegulatoryFeature | ENSMUSR00000085805 | promoter                 | rs50822192  |
| 14:34315349-34315349 | intronic variant                  | MODIFIER | Glud1         | ENSMUSG00000021794 | Transcript        | ENSMUST00000022322 | protein_coding           | rs46065220  |
| 14:34315349-34315349 | upstream_gene_variant             | MODIFIER | Shld2         | ENSMUSG00000041471 | Transcript        | ENSMUST00000111917 | protein_coding           | rs46065220  |
| 14:34315349-34315349 | upstream gene variant             | MODIFIER | Shld2         | ENSMUSG00000041471 | Transcript        | ENSMUST00000227375 | protein_coding           | rs46065220  |
| 14:34315349-34315349 | upstream gene variant             | MODIFIER | Shld2         | ENSMUSG00000041471 | Transcript        | ENSMUST00000228704 | protein_coding           | rs46065220  |
| 14:34315354-34315355 | intronic variant                  | MODIFIER | Glud1         | ENSMUSG00000021794 | Transcript        | ENSMUST00000022322 | protein_coding           | rs213503027 |
| 14:34315354-34315355 | upstream gene variant             | MODIFIER | Shld2         | ENSMUSG00000041471 | Transcript        | ENSMUST00000111917 | protein_coding           | rs213503027 |
| 14:34315354-34315355 | upstream_gene_variant             | MODIFIER | Shld2         | ENSMUSG00000041471 | Transcript        | ENSMUST00000227375 | protein_coding           | rs213503027 |
| 14:34315354-34315355 | upstream_gene_variant             | MODIFIER | Shld2         | ENSMUSG00000041471 | Transcript        | ENSMUST00000228704 | protein_coding           | rs213503027 |
| 14:34329528-34329528 | intronic variant                  | MODIFIER | Glud1         | ENSMUSG00000021794 | Transcript        | ENSMUST00000022322 | protein_coding           | rs237420270 |
| 14:34329528-34329528 | upstream gene variant             | MODIFIER | Glud1         | ENSMUSG00000021794 | Transcript        | ENSMUST00000159784 | processed_transcript     | rs237420270 |
| 14:34329528-34329528 | intronic variant,non coding trans | MODIFIER | Glud1         | ENSMUSG00000021794 | Transcript        | ENSMUST00000162912 | retained_intron          | rs237420270 |
| 14:34329528-34329528 | upstream gene variant             | MODIFIER | Glud1         | ENSMUSG00000021794 | Transcript        | ENSMUST00000163955 | protein_coding           | rs237420270 |
| 14:34330683-34330683 | intronic variant                  | MODIFIER | Glud1         | ENSMUSG00000021794 | Transcript        | ENSMUST00000022322 | protein_coding           | rs49305699  |
| 14:34330683-34330683 | upstream_gene_variant             | MODIFIER | Glud1         | ENSMUSG00000021794 | Transcript        | ENSMUST00000159784 | processed_transcript     | rs49305699  |
| 14:34330683-34330683 | upstream_gene_variant             | MODIFIER | Glud1         | ENSMUSG00000021794 | Transcript        | ENSMUST00000161593 | processed_transcript     | rs49305699  |
| 14:34330683-34330683 | intronic variant,non coding trans | MODIFIER | Glud1         | ENSMUSG00000021794 | Transcript        | ENSMUST00000162912 | retained_intron          | rs49305699  |
| 14:34330683-34330683 | upstream gene variant             | MODIFIER | Glud1         | ENSMUSG00000021794 | Transcript        | ENSMUST00000163955 | protein_coding           | rs49305699  |
| 14:34330683-34330683 | regulatory region variant         | MODIFIER | -             | -                  | RegulatoryFeature | ENSMUSR00000558992 | enhancer                 | rs49305699  |
| 14:34330701-34330701 | intronic variant                  | MODIFIER | Glud1         | ENSMUSG00000021794 | Transcript        | ENSMUST00000022322 | protein_coding           | rs50712471  |
| 14:34330701-34330701 | upstream_gene_variant             | MODIFIER | Glud1         | ENSMUSG00000021794 | Transcript        | ENSMUST00000159784 | processed_transcript     | rs50712471  |
| 14:34330701-34330701 | upstream_gene_variant             | MODIFIER | Glud1         | ENSMUSG00000021794 | Transcript        | ENSMUST00000161593 | processed_transcript     | rs50712471  |
| 14:34330701-34330701 | intronic variant,non coding trans | MODIFIER | Glud1         | ENSMUSG00000021794 | Transcript        | ENSMUST00000162912 | retained_intron          | rs50712471  |

|                      |                                 |          |         |                    |                   |                    |                          |             |
|----------------------|---------------------------------|----------|---------|--------------------|-------------------|--------------------|--------------------------|-------------|
| 14:34330701-34330701 | upstream gene variant           | MODIFIER | Glud1   | ENSMUSG00000021794 | Transcript        | ENSMUST00000163955 | protein coding           | rs50712471  |
| 14:34330701-34330701 | regulatory_region_variant       | MODIFIER | -       | -                  | RegulatoryFeature | ENSMUSR00000558992 | enhancer                 | rs50712471  |
| 14:3433204-3433208   | intron_variant                  | MODIFIER | Glud1   | ENSMUSG00000021794 | Transcript        | ENSMUST00000022322 | protein_coding           | -           |
| 14:3433204-3433208   | intron_variant,non_coding_trans | MODIFIER | Glud1   | ENSMUSG00000021794 | Transcript        | ENSMUST00000159784 | processed_transcript     | -           |
| 14:3433204-3433208   | upstream gene variant           | MODIFIER | Glud1   | ENSMUSG00000021794 | Transcript        | ENSMUST00000161593 | processed_transcript     | -           |
| 14:3433204-3433208   | intron variant,non coding trans | MODIFIER | Glud1   | ENSMUSG00000021794 | Transcript        | ENSMUST00000162912 | retained intron          | -           |
| 14:3433204-3433208   | upstream gene variant           | MODIFIER | Glud1   | ENSMUSG00000021794 | Transcript        | ENSMUST00000163955 | protein coding           | -           |
| 14:3433348-34333348  | intron_variant                  | MODIFIER | Glud1   | ENSMUSG00000021794 | Transcript        | ENSMUST0000022322  | protein_coding           | rs232600930 |
| 14:3433348-34333348  | intron_variant,non_coding_trans | MODIFIER | Glud1   | ENSMUSG00000021794 | Transcript        | ENSMUST00000159784 | processed_transcript     | rs232600930 |
| 14:3433348-34333348  | upstream_gene_variant           | MODIFIER | Glud1   | ENSMUSG00000021794 | Transcript        | ENSMUST00000161593 | processed_transcript     | rs232600930 |
| 14:3433348-34333348  | intron variant,non coding trans | MODIFIER | Glud1   | ENSMUSG00000021794 | Transcript        | ENSMUST00000162912 | retained intron          | rs232600930 |
| 14:3433348-34333348  | upstream gene variant           | MODIFIER | Glud1   | ENSMUSG00000021794 | Transcript        | ENSMUST00000163955 | protein coding           | rs232600930 |
| 14:34338732-34338732 | intron variant                  | MODIFIER | Glud1   | ENSMUSG00000021794 | Transcript        | ENSMUST0000022322  | protein coding           | rs49772968  |
| 14:34338732-34338732 | intron variant,non coding trans | MODIFIER | Glud1   | ENSMUSG00000021794 | Transcript        | ENSMUST00000159784 | processed_transcript     | rs49772968  |
| 14:34338732-34338732 | intron_variant,non_coding_trans | MODIFIER | Glud1   | ENSMUSG00000021794 | Transcript        | ENSMUST00000161593 | processed_transcript     | rs49772968  |
| 14:34338732-34338732 | downstream_gene_variant         | MODIFIER | Glud1   | ENSMUSG00000021794 | Transcript        | ENSMUST00000162912 | retained_intron          | rs49772968  |
| 14:34338732-34338732 | intron_variant                  | MODIFIER | Glud1   | ENSMUSG00000021794 | Transcript        | ENSMUST00000163955 | protein_coding           | rs49772968  |
| 14:34339286-34339286 | intron variant                  | MODIFIER | Glud1   | ENSMUSG00000021794 | Transcript        | ENSMUST0000022322  | protein coding           | rs51666756  |
| 14:34339286-34339286 | downstream gene variant         | MODIFIER | Glud1   | ENSMUSG00000021794 | Transcript        | ENSMUST00000159784 | processed_transcript     | rs51666756  |
| 14:34339286-34339286 | intron variant,non coding trans | MODIFIER | Glud1   | ENSMUSG00000021794 | Transcript        | ENSMUST00000161593 | processed_transcript     | rs51666756  |
| 14:34339286-34339286 | intron_variant                  | MODIFIER | Glud1   | ENSMUSG00000021794 | Transcript        | ENSMUST00000163955 | protein_coding           | rs51666756  |
| 14:34341492-34341492 | intron_variant                  | MODIFIER | Glud1   | ENSMUSG00000021794 | Transcript        | ENSMUST0000022322  | protein_coding           | rs52021721  |
| 14:34341492-34341492 | downstream_gene_variant         | MODIFIER | Glud1   | ENSMUSG00000021794 | Transcript        | ENSMUST00000159784 | processed_transcript     | rs52021721  |
| 14:34341492-34341492 | intron variant,non coding trans | MODIFIER | Glud1   | ENSMUSG00000021794 | Transcript        | ENSMUST00000161593 | processed_transcript     | rs52021721  |
| 14:34341492-34341492 | intron variant                  | MODIFIER | Glud1   | ENSMUSG00000021794 | Transcript        | ENSMUST00000163955 | protein coding           | rs52021721  |
| 14:34341492-34341492 | upstream gene variant           | MODIFIER | Gm3219  | ENSMUSG00000115431 | Transcript        | ENSMUST00000226608 | processed_pseudogene     | rs52021721  |
| 14:34341532-34341532 | intron variant                  | MODIFIER | Glud1   | ENSMUSG00000021794 | Transcript        | ENSMUST0000022322  | protein coding           | rs49568589  |
| 14:34341532-34341532 | downstream_gene_variant         | MODIFIER | Glud1   | ENSMUSG00000021794 | Transcript        | ENSMUST00000159784 | processed_transcript     | rs49568589  |
| 14:34341532-34341532 | intron_variant,non_coding_trans | MODIFIER | Glud1   | ENSMUSG00000021794 | Transcript        | ENSMUST00000161593 | processed_transcript     | rs49568589  |
| 14:34341532-34341532 | intron_variant                  | MODIFIER | Glud1   | ENSMUSG00000021794 | Transcript        | ENSMUST00000163955 | protein_coding           | rs49568589  |
| 14:34341532-34341532 | upstream gene variant           | MODIFIER | Gm3219  | ENSMUSG00000115431 | Transcript        | ENSMUST00000226608 | processed_pseudogene     | rs49568589  |
| 14:36941260-36941260 | 5_prime_UTR_variant             | MODIFIER | Ccser2  | ENSMUSG00000058690 | Transcript        | ENSMUST00000067700 | protein coding           | rs48050647  |
| 14:36941260-36941260 | MODIFIER                        | MODIFIER | Ccser2  | ENSMUSG00000058690 | Transcript        | ENSMUST00000090024 | protein coding           | rs48050647  |
| 14:36941260-36941260 | upstream_gene_variant           | MODIFIER | Ccser2  | ENSMUSG00000058690 | Transcript        | ENSMUST00000182635 | processed_transcript     | rs48050647  |
| 14:45587622-45587622 | downstream_gene_variant         | MODIFIER | Ddhd1   | ENSMUSG00000037697 | Transcript        | ENSMUST00000087320 | protein_coding           | rs31281331  |
| 14:45587622-45587622 | downstream_gene_variant         | MODIFIER | Ddhd1   | ENSMUSG00000037697 | Transcript        | ENSMUST00000111828 | protein_coding           | rs31281331  |
| 14:45587622-45587622 | upstream gene variant           | MODIFIER | Gm15601 | ENSMUSG00000085913 | Transcript        | ENSMUST00000122972 | antisense                | rs31281331  |
| 14:45587622-45587622 | intron variant,non coding trans | MODIFIER | Gm15601 | ENSMUSG00000085913 | Transcript        | ENSMUST00000226558 | antisense                | rs31281331  |
| 14:45587622-45587622 | downstream gene variant         | MODIFIER | Gm49124 | ENSMUSG00000115553 | Transcript        | ENSMUST00000228948 | lincRNA                  | rs31281331  |
| 14:45587622-45587622 | regulatory region variant       | MODIFIER | -       | -                  | RegulatoryFeature | ENSMUSR00000559640 | promoter flanking region | rs31281331  |
| 14:45587813-45587813 | downstream_gene_variant         | MODIFIER | Ddhd1   | ENSMUSG00000037697 | Transcript        | ENSMUST00000087320 | protein_coding           | rs216602480 |
| 14:45587813-45587813 | downstream_gene_variant         | MODIFIER | Ddhd1   | ENSMUSG00000037697 | Transcript        | ENSMUST00000111828 | protein_coding           | rs216602480 |
| 14:45587813-45587813 | non_coding_transcript_exon_var  | MODIFIER | Gm15601 | ENSMUSG00000085913 | Transcript        | ENSMUST00000122972 | antisense                | rs216602480 |
| 14:45587813-45587813 | intron variant,non coding trans | MODIFIER | Gm15601 | ENSMUSG00000085913 | Transcript        | ENSMUST00000226558 | antisense                | rs216602480 |
| 14:45587813-45587813 | downstream gene variant         | MODIFIER | Gm49124 | ENSMUSG00000115553 | Transcript        | ENSMUST00000228948 | lincRNA                  | rs216602480 |
| 14:45587813-45587813 | regulatory region variant       | MODIFIER | -       | -                  | RegulatoryFeature | ENSMUSR00000559640 | promoter flanking region | rs216602480 |
| 14:45589789-45589789 | downstream_gene_variant         | MODIFIER | Ddhd1   | ENSMUSG00000037697 | Transcript        | ENSMUST00000051310 | protein_coding           | rs50149827  |
| 14:45589789-45589789 | 3_prime_UTR_variant             | MODIFIER | Ddhd1   | ENSMUSG00000037697 | Transcript        | ENSMUST00000087320 | protein_coding           | rs50149827  |
| 14:45589789-45589789 | 3_prime_UTR_variant             | MODIFIER | Ddhd1   | ENSMUSG00000037697 | Transcript        | ENSMUST00000111828 | protein_coding           | rs50149827  |
| 14:45589789-45589789 | intron variant,non coding trans | MODIFIER | Gm15601 | ENSMUSG00000085913 | Transcript        | ENSMUST00000122972 | antisense                | rs50149827  |
| 14:45589789-45589789 | downstream gene variant         | MODIFIER | Ddhd1   | ENSMUSG00000037697 | Transcript        | ENSMUST00000129599 | retained intron          | rs50149827  |
| 14:45589789-45589789 | downstream gene variant         | MODIFIER | Ddhd1   | ENSMUSG00000037697 | Transcript        | ENSMUST00000149286 | nonsense mediated decay  | rs50149827  |
| 14:45589789-45589789 | downstream gene variant         | MODIFIER | Ddhd1   | ENSMUSG00000037697 | Transcript        | ENSMUST00000152110 | retained intron          | rs50149827  |
| 14:45589789-45589789 | intron_variant,non_coding_trans | MODIFIER | Gm15601 | ENSMUSG00000085913 | Transcript        | ENSMUST00000226558 | antisense                | rs50149827  |
| 14:45589789-45589789 | downstream_gene_variant         | MODIFIER | Gm49124 | ENSMUSG00000115553 | Transcript        | ENSMUST00000228948 | lincRNA                  | rs50149827  |
| 14:45589802-45589802 | downstream_gene_variant         | MODIFIER | Ddhd1   | ENSMUSG00000037697 | Transcript        | ENSMUST00000051310 | protein_coding           | rs46971765  |
| 14:45589802-45589802 | 3_prime_UTR_variant             | MODIFIER | Ddhd1   | ENSMUSG00000037697 | Transcript        | ENSMUST00000087320 | protein_coding           | rs46971765  |
| 14:45589802-45589802 | 3_prime_UTR_variant             | MODIFIER | Ddhd1   | ENSMUSG00000037697 | Transcript        | ENSMUST00000111828 | protein_coding           | rs46971765  |
| 14:45589802-45589802 | intron variant,non coding trans | MODIFIER | Gm15601 | ENSMUSG00000085913 | Transcript        | ENSMUST00000122972 | antisense                | rs46971765  |
| 14:45589802-45589802 | downstream_gene_variant         | MODIFIER | Ddhd1   | ENSMUSG00000037697 | Transcript        | ENSMUST00000129599 | retained_intron          | rs46971765  |
| 14:45589802-45589802 | downstream_gene_variant         | MODIFIER | Ddhd1   | ENSMUSG00000037697 | Transcript        | ENSMUST00000149286 | nonsense mediated_decay  | rs46971765  |
| 14:45589802-45589802 | downstream_gene_variant         | MODIFIER | Ddhd1   | ENSMUSG00000037697 | Transcript        | ENSMUST00000152110 | retained_intron          | rs46971765  |
| 14:45589802-45589802 | intron variant,non coding trans | MODIFIER | Gm15601 | ENSMUSG00000085913 | Transcript        | ENSMUST00000226558 | antisense                | rs46971765  |
| 14:45589802-45589802 | downstream gene variant         | MODIFIER | Gm49124 | ENSMUSG00000115553 | Transcript        | ENSMUST00000228948 | lincRNA                  | rs46971765  |
| 14:45597307-45597307 | intron variant                  | MODIFIER | Ddhd1   | ENSMUSG00000037697 | Transcript        | ENSMUST00000051310 | protein coding           | rs30798359  |
| 14:45597307-45597307 | intron variant                  | MODIFIER | Ddhd1   | ENSMUSG00000037697 | Transcript        | ENSMUST00000087320 | protein coding           | rs30798359  |
| 14:45597307-45597307 | intron_variant                  | MODIFIER | Ddhd1   | ENSMUSG00000037697 | Transcript        | ENSMUST00000111828 | protein_coding           | rs30798359  |
| 14:45597307-45597307 | non_coding_transcript_exon_var  | MODIFIER | Gm15601 | ENSMUSG00000085913 | Transcript        | ENSMUST00000122972 | antisense                | rs30798359  |
| 14:45597307-45597307 | intron_variant,non_coding_trans | MODIFIER | Ddhd1   | ENSMUSG00000037697 | Transcript        | ENSMUST00000129599 | retained_intron          | rs30798359  |



|                      |                                 |          |           |                    |            |                    |                         |             |
|----------------------|---------------------------------|----------|-----------|--------------------|------------|--------------------|-------------------------|-------------|
| 14:46814046-46814047 | intron variant                  | MODIFIER | Gmfb      | ENSMUSG00000062014 | Transcript | ENSMUST00000226937 | protein coding          | rs218050845 |
| 14:46814046-46814047 | intron_variant,non_coding_trans | MODIFIER | Gmfb      | ENSMUSG00000062014 | Transcript | ENSMUST00000228065 | processed_transcript    | rs218050845 |
| 14:46814046-46814047 | intron_variant,non_coding_trans | MODIFIER | Gmfb      | ENSMUSG00000062014 | Transcript | ENSMUST00000228515 | retained_intron         | rs218050845 |
| 14:46840418-46840418 | intron variant                  | MODIFIER | Cgrrf1    | ENSMUSG00000055128 | Transcript | ENSMUST00000068532 | protein coding          | rs52003483  |
| 14:46840418-46840418 | intron variant,non coding trans | MODIFIER | Cgrrf1    | ENSMUSG00000055128 | Transcript | ENSMUST00000133790 | retained intron         | rs52003483  |
| 14:46840418-46840418 | intron variant                  | MODIFIER | Cgrrf1    | ENSMUSG00000055128 | Transcript | ENSMUST00000133989 | protein coding          | rs52003483  |
| 14:46840418-46840418 | downstream gene variant         | MODIFIER | Cgrrf1    | ENSMUSG00000055128 | Transcript | ENSMUST00000140114 | protein coding          | rs52003483  |
| 14:46840418-46840418 | intron_variant,NMD_transcript_v | MODIFIER | Cgrrf1    | ENSMUSG00000055128 | Transcript | ENSMUST00000226861 | nonsense_mediated_decay | rs52003483  |
| 14:46840418-46840418 | upstream_gene_variant           | MODIFIER | Gm48949   | ENSMUSG00000115417 | Transcript | ENSMUST00000228424 | sense_intronic          | rs52003483  |
| 14:46840583-46840583 | intron variant                  | MODIFIER | Cgrrf1    | ENSMUSG00000055128 | Transcript | ENSMUST00000068532 | protein coding          | rs30828502  |
| 14:46840583-46840583 | intron variant,non coding trans | MODIFIER | Cgrrf1    | ENSMUSG00000055128 | Transcript | ENSMUST00000133790 | retained intron         | rs30828502  |
| 14:46840583-46840583 | intron variant                  | MODIFIER | Cgrrf1    | ENSMUSG00000055128 | Transcript | ENSMUST00000133989 | protein coding          | rs30828502  |
| 14:46840583-46840583 | downstream gene variant         | MODIFIER | Cgrrf1    | ENSMUSG00000055128 | Transcript | ENSMUST00000140114 | protein coding          | rs30828502  |
| 14:46840583-46840583 | intron_variant,NMD_transcript_v | MODIFIER | Cgrrf1    | ENSMUSG00000055128 | Transcript | ENSMUST00000226861 | nonsense mediated decay | rs30828502  |
| 14:46840583-46840583 | upstream_gene_variant           | MODIFIER | Gm48949   | ENSMUSG00000115417 | Transcript | ENSMUST00000228424 | sense_intronic          | rs30828502  |
| 14:46842494-46842494 | intron variant                  | MODIFIER | Cgrrf1    | ENSMUSG00000055128 | Transcript | ENSMUST00000068532 | protein coding          | rs46541737  |
| 14:46842494-46842494 | intron_variant,non_coding_trans | MODIFIER | Cgrrf1    | ENSMUSG00000055128 | Transcript | ENSMUST00000133790 | retained_intron         | rs46541737  |
| 14:46842494-46842494 | intron variant                  | MODIFIER | Cgrrf1    | ENSMUSG00000055128 | Transcript | ENSMUST00000133989 | protein coding          | rs46541737  |
| 14:46842494-46842494 | downstream gene variant         | MODIFIER | Cgrrf1    | ENSMUSG00000055128 | Transcript | ENSMUST00000140114 | protein coding          | rs46541737  |
| 14:46842494-46842494 | 3 prime UTR variant,NMD trar    | MODIFIER | Cgrrf1    | ENSMUSG00000055128 | Transcript | ENSMUST00000226861 | nonsense mediated decay | rs46541737  |
| 14:46842494-46842494 | upstream_gene_variant           | MODIFIER | Gm48949   | ENSMUSG00000115417 | Transcript | ENSMUST00000228424 | sense_intronic          | rs46541737  |
| 14:46846780-46846780 | intron variant                  | MODIFIER | Cgrrf1    | ENSMUSG00000055128 | Transcript | ENSMUST00000068532 | protein coding          | rs30827725  |
| 14:46846780-46846780 | non_coding_transcript_exon_var  | MODIFIER | Cgrrf1    | ENSMUSG00000055128 | Transcript | ENSMUST00000133790 | retained_intron         | rs30827725  |
| 14:46846780-46846780 | downstream gene variant         | MODIFIER | Cgrrf1    | ENSMUSG00000055128 | Transcript | ENSMUST00000133989 | protein coding          | rs30827725  |
| 14:46846780-46846780 | intron variant,NMD transcript v | MODIFIER | Cgrrf1    | ENSMUSG00000055128 | Transcript | ENSMUST00000226861 | nonsense mediated decay | rs30827725  |
| 14:46846780-46846780 | downstream gene variant         | MODIFIER | Gm48949   | ENSMUSG00000115417 | Transcript | ENSMUST00000228424 | sense intronic          | rs30827725  |
| 14:46847939-46847939 | intron variant                  | MODIFIER | Cgrrf1    | ENSMUSG00000055128 | Transcript | ENSMUST00000068532 | protein coding          | rs30353058  |
| 14:46847939-46847939 | non_coding_transcript_exon_var  | MODIFIER | Cgrrf1    | ENSMUSG00000055128 | Transcript | ENSMUST00000133790 | retained_intron         | rs30353058  |
| 14:46847939-46847939 | downstream_gene_variant         | MODIFIER | Cgrrf1    | ENSMUSG00000055128 | Transcript | ENSMUST00000133989 | protein coding          | rs30353058  |
| 14:46847939-46847939 | intron_variant,NMD_transcript_v | MODIFIER | Cgrrf1    | ENSMUSG00000055128 | Transcript | ENSMUST00000226861 | nonsense_mediated_decay | rs30353058  |
| 14:46847939-46847939 | downstream gene variant         | MODIFIER | Gm48949   | ENSMUSG00000115417 | Transcript | ENSMUST00000228424 | sense intronic          | rs30353058  |
| 14:47246358-47246358 | intron variant                  | MODIFIER | Wdhd1     | ENSMUSG00000037572 | Transcript | ENSMUST00000111792 | protein coding          | rs31424134  |
| 14:47246358-47246358 | intron variant                  | MODIFIER | Wdhd1     | ENSMUSG00000037572 | Transcript | ENSMUST00000187531 | protein coding          | rs31424134  |
| 14:47246358-47246358 | downstream_gene_variant         | MODIFIER | Wdhd1     | ENSMUSG00000037572 | Transcript | ENSMUST00000227041 | protein coding          | rs31424134  |
| 14:47246358-47246358 | upstream_gene_variant           | MODIFIER | Wdhd1     | ENSMUSG00000037572 | Transcript | ENSMUST00000228810 | retained_intron         | rs31424134  |
| 14:47251360-47251360 | intron variant                  | MODIFIER | Wdhd1     | ENSMUSG00000037572 | Transcript | ENSMUST00000111792 | protein coding          | rs49087341  |
| 14:47251360-47251360 | intron variant                  | MODIFIER | Wdhd1     | ENSMUSG00000037572 | Transcript | ENSMUST00000187531 | protein coding          | rs49087341  |
| 14:47251360-47251360 | intron variant                  | MODIFIER | Wdhd1     | ENSMUSG00000037572 | Transcript | ENSMUST00000227041 | protein coding          | rs49087341  |
| 14:47268030-47268030 | intron variant                  | MODIFIER | Wdhd1     | ENSMUSG00000037572 | Transcript | ENSMUST00000111790 | protein coding          | rs50829698  |
| 14:47268030-47268030 | intron variant                  | MODIFIER | Wdhd1     | ENSMUSG00000037572 | Transcript | ENSMUST00000111792 | protein coding          | rs50829698  |
| 14:47268030-47268030 | downstream_gene_variant         | MODIFIER | Gm24378   | ENSMUSG00000084648 | Transcript | ENSMUST00000122699 | snRNA                   | rs50829698  |
| 14:47268030-47268030 | downstream_gene_variant         | MODIFIER | Wdhd1     | ENSMUSG00000037572 | Transcript | ENSMUST00000139124 | retained_intron         | rs50829698  |
| 14:47268030-47268030 | intron variant                  | MODIFIER | Wdhd1     | ENSMUSG00000037572 | Transcript | ENSMUST00000187531 | protein coding          | rs50829698  |
| 14:47322285-47322285 | 3 prime UTR variant             | MODIFIER | Mapk1ip1l | ENSMUSG00000021840 | Transcript | ENSMUST00000164235 | protein coding          | rs48991040  |
| 14:47322285-47322285 | 3 prime UTR variant             | MODIFIER | Mapk1ip1l | ENSMUSG00000021840 | Transcript | ENSMUST00000166743 | protein coding          | rs48991040  |
| 14:47322285-47322285 | upstream gene variant           | MODIFIER | Gm49190   | ENSMUSG00000115728 | Transcript | ENSMUST00000227470 | processed_pseudogene    | rs48991040  |
| 14:47543560-47543560 | intron variant                  | MODIFIER | Atg14     | ENSMUSG00000037526 | Transcript | ENSMUST00000042988 | protein coding          | rs30159909  |
| 14:47543560-47543560 | intron variant                  | MODIFIER | Atg14     | ENSMUSG00000037526 | Transcript | ENSMUST00000226299 | protein coding          | rs30159909  |
| 14:47543560-47543560 | intron_variant,non_coding_trans | MODIFIER | Gm49004   | ENSMUSG00000115823 | Transcript | ENSMUST00000228568 | antisense               | rs30159909  |
| 14:47719654-47719654 | intron variant                  | MODIFIER | Ktn1      | ENSMUSG00000021843 | Transcript | ENSMUST00000022391 | protein coding          | rs46736992  |
| 14:47719654-47719654 | intron variant                  | MODIFIER | Ktn1      | ENSMUSG00000021843 | Transcript | ENSMUST00000185343 | protein coding          | rs46736992  |
| 14:47719654-47719654 | intron variant                  | MODIFIER | Ktn1      | ENSMUSG00000021843 | Transcript | ENSMUST00000185940 | protein coding          | rs46736992  |
| 14:47719654-47719654 | intron variant                  | MODIFIER | Ktn1      | ENSMUSG00000021843 | Transcript | ENSMUST00000186627 | protein coding          | rs46736992  |
| 14:47719654-47719654 | downstream_gene_variant         | MODIFIER | Ktn1      | ENSMUSG00000021843 | Transcript | ENSMUST00000186700 | retained_intron         | rs46736992  |
| 14:47719654-47719654 | intron variant                  | MODIFIER | Ktn1      | ENSMUSG00000021843 | Transcript | ENSMUST00000186761 | protein coding          | rs46736992  |
| 14:47719654-47719654 | intron variant                  | MODIFIER | Ktn1      | ENSMUSG00000021843 | Transcript | ENSMUST00000187039 | protein coding          | rs46736992  |
| 14:47719654-47719654 | intron variant                  | MODIFIER | Ktn1      | ENSMUSG00000021843 | Transcript | ENSMUST00000187262 | protein coding          | rs46736992  |
| 14:47719654-47719654 | intron variant                  | MODIFIER | Ktn1      | ENSMUSG00000021843 | Transcript | ENSMUST00000187839 | protein coding          | rs46736992  |
| 14:47719654-47719654 | intron variant,non coding trans | MODIFIER | Ktn1      | ENSMUSG00000021843 | Transcript | ENSMUST00000188049 | retained intron         | rs46736992  |
| 14:47719654-47719654 | intron variant                  | MODIFIER | Ktn1      | ENSMUSG00000021843 | Transcript | ENSMUST00000188330 | protein coding          | rs46736992  |
| 14:47719654-47719654 | intron variant                  | MODIFIER | Ktn1      | ENSMUSG00000021843 | Transcript | ENSMUST00000188553 | protein coding          | rs46736992  |
| 14:47719654-47719654 | intron variant                  | MODIFIER | Ktn1      | ENSMUSG00000021843 | Transcript | ENSMUST00000189101 | protein coding          | rs46736992  |
| 14:47719654-47719654 | intron variant                  | MODIFIER | Ktn1      | ENSMUSG00000021843 | Transcript | ENSMUST00000189533 | protein coding          | rs46736992  |
| 14:47719654-47719654 | intron variant,NMD transcript v | MODIFIER | Ktn1      | ENSMUSG00000021843 | Transcript | ENSMUST00000189986 | nonsense mediated decay | rs46736992  |
| 14:47719654-47719654 | intron variant                  | MODIFIER | Ktn1      | ENSMUSG00000021843 | Transcript | ENSMUST00000190182 | protein coding          | rs46736992  |
| 14:47719654-47719654 | intron variant                  | MODIFIER | Ktn1      | ENSMUSG00000021843 | Transcript | ENSMUST00000190252 | protein coding          | rs46736992  |
| 14:47719654-47719654 | intron_variant                  | MODIFIER | Ktn1      | ENSMUSG00000021843 | Transcript | ENSMUST00000190535 | protein coding          | rs46736992  |
| 14:47719654-47719654 | intron_variant                  | MODIFIER | Ktn1      | ENSMUSG00000021843 | Transcript | ENSMUST00000190999 | protein coding          | rs46736992  |
| 14:47719654-47719654 | intron_variant                  | MODIFIER | Ktn1      | ENSMUSG00000021843 | Transcript | ENSMUST00000191018 | protein coding          | rs46736992  |





|                      |                                 |          |         |                    |                   |                    |                         |            |
|----------------------|---------------------------------|----------|---------|--------------------|-------------------|--------------------|-------------------------|------------|
| 14:48241292-48241292 | intron variant,NMD transcript v | MODIFIER | Peli2   | ENSMUSG00000021846 | Transcript        | ENSMUST00000226828 | nonsense mediated decay | rs48227708 |
| 14:48241292-48241292 | intron_variant                  | MODIFIER | Peli2   | ENSMUSG00000021846 | Transcript        | ENSMUST00000227362 | protein_coding          | rs48227708 |
| 14:48241292-48241292 | intron_variant,non_coding_trans | MODIFIER | Peli2   | ENSMUSG00000021846 | Transcript        | ENSMUST00000228519 | processed_transcript    | rs48227708 |
| 14:48501176-48501176 | intron_variant                  | MODIFIER | Tmem260 | ENSMUSG00000036339 | Transcript        | ENSMUST00000111735 | protein_coding          | rs31093505 |
| 14:48501176-48501176 | intron_variant                  | MODIFIER | Tmem260 | ENSMUSG00000036339 | Transcript        | ENSMUST00000124720 | protein_coding          | rs31093505 |
| 14:48501176-48501176 | non coding transcript exon var  | MODIFIER | Tmem260 | ENSMUSG00000036339 | Transcript        | ENSMUST00000133744 | retained_intron         | rs31093505 |
| 14:48501176-48501176 | intron variant,NMD transcript v | MODIFIER | Tmem260 | ENSMUSG00000036339 | Transcript        | ENSMUST00000153765 | nonsense mediated decay | rs31093505 |
| 14:48501176-48501176 | intron_variant,non_coding_trans | MODIFIER | Tmem260 | ENSMUSG00000036339 | Transcript        | ENSMUST00000156480 | retained_intron         | rs31093505 |
| 14:48501176-48501176 | upstream_gene_variant           | MODIFIER | Tmem260 | ENSMUSG00000036339 | Transcript        | ENSMUST00000226344 | retained_intron         | rs31093505 |
| 14:48501176-48501176 | intron_variant                  | MODIFIER | Tmem260 | ENSMUSG00000036339 | Transcript        | ENSMUST00000226422 | protein_coding          | rs31093505 |
| 14:48501176-48501176 | intron_variant                  | MODIFIER | Tmem260 | ENSMUSG00000036339 | Transcript        | ENSMUST00000227440 | protein_coding          | rs31093505 |
| 14:48501176-48501176 | downstream gene variant         | MODIFIER | Tmem260 | ENSMUSG00000036339 | Transcript        | ENSMUST00000228697 | protein_coding          | rs31093505 |
| 14:48511581-48511581 | intron variant                  | MODIFIER | Tmem260 | ENSMUSG00000036339 | Transcript        | ENSMUST00000111735 | protein_coding          | rs48453383 |
| 14:48511581-48511581 | intron variant                  | MODIFIER | Tmem260 | ENSMUSG00000036339 | Transcript        | ENSMUST00000124720 | protein_coding          | rs48453383 |
| 14:48511581-48511581 | intron_variant,NMD_transcript_v | MODIFIER | Tmem260 | ENSMUSG00000036339 | Transcript        | ENSMUST00000153765 | nonsense_mediated_decay | rs48453383 |
| 14:48511581-48511581 | downstream_gene_variant         | MODIFIER | Tmem260 | ENSMUSG00000036339 | Transcript        | ENSMUST00000156480 | retained_intron         | rs48453383 |
| 14:48511581-48511581 | downstream_gene_variant         | MODIFIER | Tmem260 | ENSMUSG00000036339 | Transcript        | ENSMUST00000226344 | retained_intron         | rs48453383 |
| 14:48511581-48511581 | intron variant                  | MODIFIER | Tmem260 | ENSMUSG00000036339 | Transcript        | ENSMUST00000226422 | protein_coding          | rs48453383 |
| 14:48511581-48511581 | intron variant                  | MODIFIER | Tmem260 | ENSMUSG00000036339 | Transcript        | ENSMUST00000227440 | protein_coding          | rs48453383 |
| 14:49014430-49014430 | downstream gene variant         | MODIFIER | Exoc5   | ENSMUSG00000061244 | Transcript        | ENSMUST00000159651 | retained_intron         | rs30139075 |
| 14:49014430-49014430 | downstream_gene_variant         | MODIFIER | Exoc5   | ENSMUSG00000061244 | Transcript        | ENSMUST00000160453 | retained_intron         | rs30139075 |
| 14:49014430-49014430 | downstream_gene_variant         | MODIFIER | Exoc5   | ENSMUSG00000061244 | Transcript        | ENSMUST00000160833 | retained_intron         | rs30139075 |
| 14:49014430-49014430 | intron_variant                  | MODIFIER | Exoc5   | ENSMUSG00000061244 | Transcript        | ENSMUST00000161504 | protein_coding          | rs30139075 |
| 14:49014430-49014430 | intron variant                  | MODIFIER | Exoc5   | ENSMUSG00000061244 | Transcript        | ENSMUST00000162175 | protein_coding          | rs30139075 |
| 14:49081637-49081637 | intron variant                  | MODIFIER | Ap5m1   | ENSMUSG00000036291 | Transcript        | ENSMUST00000037473 | protein_coding          | rs48053724 |
| 14:49081637-49081637 | upstream gene variant           | MODIFIER | Ap5m1   | ENSMUSG00000036291 | Transcript        | ENSMUST00000226695 | protein_coding          | rs48053724 |
| 14:49081637-49081637 | intron variant                  | MODIFIER | Ap5m1   | ENSMUSG00000036291 | Transcript        | ENSMUST00000227066 | protein_coding          | rs48053724 |
| 14:49081637-49081637 | intron_variant,NMD_transcript_v | MODIFIER | Ap5m1   | ENSMUSG00000036291 | Transcript        | ENSMUST00000227410 | nonsense_mediated_decay | rs48053724 |
| 14:49081637-49081637 | 3_prime_UTR_variant             | MODIFIER | Ap5m1   | ENSMUSG00000036291 | Transcript        | ENSMUST00000227431 | protein_coding          | rs48053724 |
| 14:49081637-49081637 | intron_variant,NMD_transcript_v | MODIFIER | Ap5m1   | ENSMUSG00000036291 | Transcript        | ENSMUST00000227608 | nonsense_mediated_decay | rs48053724 |
| 14:49081637-49081637 | downstream gene variant         | MODIFIER | Ap5m1   | ENSMUSG00000036291 | Transcript        | ENSMUST00000227991 | protein_coding          | rs48053724 |
| 14:49081637-49081637 | downstream gene variant         | MODIFIER | Ap5m1   | ENSMUSG00000036291 | Transcript        | ENSMUST00000228238 | protein_coding          | rs48053724 |
| 14:49081920-49081920 | intron variant                  | MODIFIER | Ap5m1   | ENSMUSG00000036291 | Transcript        | ENSMUST00000037473 | protein_coding          | rs49729908 |
| 14:49081920-49081920 | upstream_gene_variant           | MODIFIER | Ap5m1   | ENSMUSG00000036291 | Transcript        | ENSMUST00000226695 | protein_coding          | rs49729908 |
| 14:49081920-49081920 | intron_variant                  | MODIFIER | Ap5m1   | ENSMUSG00000036291 | Transcript        | ENSMUST00000227066 | protein_coding          | rs49729908 |
| 14:49081920-49081920 | intron_variant,NMD_transcript_v | MODIFIER | Ap5m1   | ENSMUSG00000036291 | Transcript        | ENSMUST00000227410 | nonsense_mediated_decay | rs49729908 |
| 14:49081920-49081920 | 3 prime UTR variant             | MODIFIER | Ap5m1   | ENSMUSG00000036291 | Transcript        | ENSMUST00000227431 | protein_coding          | rs49729908 |
| 14:49081920-49081920 | intron variant,NMD transcript v | MODIFIER | Ap5m1   | ENSMUSG00000036291 | Transcript        | ENSMUST00000227608 | nonsense mediated decay | rs49729908 |
| 14:49081920-49081920 | downstream gene variant         | MODIFIER | Ap5m1   | ENSMUSG00000036291 | Transcript        | ENSMUST00000227991 | protein_coding          | rs49729908 |
| 14:49173664-49173664 | intron variant                  | MODIFIER | Naa30   | ENSMUSG00000036282 | Transcript        | ENSMUST00000037362 | protein_coding          | rs48797461 |
| 14:49173664-49173664 | upstream_gene_variant           | MODIFIER | Naa30   | ENSMUSG00000036282 | Transcript        | ENSMUST00000134984 | retained_intron         | rs48797461 |
| 14:49173664-49173664 | intron_variant                  | MODIFIER | Naa30   | ENSMUSG00000036282 | Transcript        | ENSMUST00000136995 | protein_coding          | rs48797461 |
| 14:49173664-49173664 | upstream_gene_variant           | MODIFIER | Naa30   | ENSMUSG00000036282 | Transcript        | ENSMUST00000138478 | retained_intron         | rs48797461 |
| 14:49173664-49173664 | intron variant                  | MODIFIER | Naa30   | ENSMUSG00000036282 | Transcript        | ENSMUST00000153488 | protein_coding          | rs48797461 |
| 14:49173664-49173664 | regulatory region variant       | MODIFIER | -       | -                  | RegulatoryFeature | ENSMUSR00000087101 | promoter                | rs48797461 |
| 14:49173716-49173716 | intron variant                  | MODIFIER | Naa30   | ENSMUSG00000036282 | Transcript        | ENSMUST00000037362 | protein_coding          | rs50393618 |
| 14:49173716-49173716 | upstream_gene_variant           | MODIFIER | Naa30   | ENSMUSG00000036282 | Transcript        | ENSMUST00000134984 | retained_intron         | rs50393618 |
| 14:49173716-49173716 | intron_variant                  | MODIFIER | Naa30   | ENSMUSG00000036282 | Transcript        | ENSMUST00000136995 | protein_coding          | rs50393618 |
| 14:49173716-49173716 | upstream_gene_variant           | MODIFIER | Naa30   | ENSMUSG00000036282 | Transcript        | ENSMUST00000138478 | retained_intron         | rs50393618 |
| 14:49173716-49173716 | intron variant                  | MODIFIER | Naa30   | ENSMUSG00000036282 | Transcript        | ENSMUST00000153488 | protein_coding          | rs50393618 |
| 14:49173716-49173716 | regulatory region variant       | MODIFIER | -       | -                  | RegulatoryFeature | ENSMUSR00000087101 | promoter                | rs50393618 |
| 14:49174669-49174669 | intron variant                  | MODIFIER | Naa30   | ENSMUSG00000036282 | Transcript        | ENSMUST00000037362 | protein_coding          | rs30390823 |
| 14:49174669-49174669 | upstream gene variant           | MODIFIER | Naa30   | ENSMUSG00000036282 | Transcript        | ENSMUST00000134984 | retained_intron         | rs30390823 |
| 14:49174669-49174669 | intron_variant                  | MODIFIER | Naa30   | ENSMUSG00000036282 | Transcript        | ENSMUST00000136995 | protein_coding          | rs30390823 |
| 14:49174669-49174669 | upstream_gene_variant           | MODIFIER | Naa30   | ENSMUSG00000036282 | Transcript        | ENSMUST00000138478 | retained_intron         | rs30390823 |
| 14:49174669-49174669 | intron_variant                  | MODIFIER | Naa30   | ENSMUSG00000036282 | Transcript        | ENSMUST00000153488 | protein_coding          | rs30390823 |
| 14:49176189-49176189 | intron variant                  | MODIFIER | Naa30   | ENSMUSG00000036282 | Transcript        | ENSMUST00000037362 | protein_coding          | rs30941667 |
| 14:49176189-49176189 | upstream gene variant           | MODIFIER | Naa30   | ENSMUSG00000036282 | Transcript        | ENSMUST00000134984 | retained_intron         | rs30941667 |
| 14:49176189-49176189 | intron variant                  | MODIFIER | Naa30   | ENSMUSG00000036282 | Transcript        | ENSMUST00000136995 | protein_coding          | rs30941667 |
| 14:49176189-49176189 | upstream_gene_variant           | MODIFIER | Naa30   | ENSMUSG00000036282 | Transcript        | ENSMUST00000138478 | retained_intron         | rs30941667 |
| 14:49176189-49176189 | intron_variant                  | MODIFIER | Naa30   | ENSMUSG00000036282 | Transcript        | ENSMUST00000153488 | protein_coding          | rs30941667 |
| 14:50774017-50774017 | intron_variant                  | MODIFIER | Ttc5    | ENSMUSG00000006288 | Transcript        | ENSMUST00000006451 | protein_coding          | rs50702926 |
| 14:50774017-50774017 | downstream gene variant         | MODIFIER | Gm10916 | ENSMUSG00000078125 | Transcript        | ENSMUST00000080330 | processed_pseudogene    | rs50702926 |
| 14:50774017-50774017 | downstream gene variant         | MODIFIER | Ttc5    | ENSMUSG00000006288 | Transcript        | ENSMUST00000226768 | protein_coding          | rs50702926 |
| 14:50774017-50774017 | intron variant,non coding trans | MODIFIER | Ttc5    | ENSMUSG00000006288 | Transcript        | ENSMUST00000227327 | retained_intron         | rs50702926 |
| 14:50774017-50774017 | upstream gene variant           | MODIFIER | Ttc5    | ENSMUSG00000006288 | Transcript        | ENSMUST00000227751 | nonsense mediated decay | rs50702926 |
| 14:50774017-50774017 | downstream_gene_variant         | MODIFIER | Ttc5    | ENSMUSG00000006288 | Transcript        | ENSMUST00000227934 | retained_intron         | rs50702926 |
| 14:50774017-50774017 | intron_variant,NMD_transcript_v | MODIFIER | Ttc5    | ENSMUSG00000006288 | Transcript        | ENSMUST00000228440 | nonsense_mediated_decay | rs50702926 |
| 14:50818433-50818433 | intron_variant                  | MODIFIER | Parp2   | ENSMUSG00000036023 | Transcript        | ENSMUST00000036126 | protein_coding          | rs36805892 |

|                      |                                 |          |         |                     |                   |                    |                          |            |
|----------------------|---------------------------------|----------|---------|---------------------|-------------------|--------------------|--------------------------|------------|
| 14:50818433-50818433 | downstream gene variant         | MODIFIER | Parp2   | ENSMUSG00000036023  | Transcript        | ENSMUST00000226880 | retained intron          | rs36805892 |
| 14:50818433-50818433 | intron_variant,NMD_transcript_v | MODIFIER | Parp2   | ENSMUSG00000036023  | Transcript        | ENSMUST00000227810 | nonsense_mediated_decay  | rs36805892 |
| 14:50818433-50818433 | upstream_gene_variant           | MODIFIER | Parp2   | ENSMUSG00000036023  | Transcript        | ENSMUST00000228624 | retained_intron          | rs36805892 |
| 14:50818433-50818433 | intron_variant,non_coding_trans | MODIFIER | Parp2   | ENSMUSG00000036023  | Transcript        | ENSMUST00000228672 | retained_intron          | rs36805892 |
| 14:50818433-50818433 | upstream gene variant           | MODIFIER | Parp2   | ENSMUSG00000036023  | Transcript        | ENSMUST00000228833 | retained intron          | rs36805892 |
| 14:50818433-50818433 | upstream gene variant           | MODIFIER | Parp2   | ENSMUSG00000036023  | Transcript        | ENSMUST00000228872 | retained intron          | rs36805892 |
| 14:50818851-50818851 | intron variant                  | MODIFIER | Parp2   | ENSMUSG00000036023  | Transcript        | ENSMUST00000036126 | protein coding           | rs36588050 |
| 14:50818851-50818851 | downstream_gene_variant         | MODIFIER | Parp2   | ENSMUSG00000036023  | Transcript        | ENSMUST00000226880 | retained_intron          | rs36588050 |
| 14:50818851-50818851 | intron_variant,NMD_transcript_v | MODIFIER | Parp2   | ENSMUSG00000036023  | Transcript        | ENSMUST00000227810 | nonsense_mediated_decay  | rs36588050 |
| 14:50818851-50818851 | upstream_gene_variant           | MODIFIER | Parp2   | ENSMUSG00000036023  | Transcript        | ENSMUST00000228624 | retained_intron          | rs36588050 |
| 14:50818851-50818851 | intron_variant,non_coding_trans | MODIFIER | Parp2   | ENSMUSG00000036023  | Transcript        | ENSMUST00000228672 | retained intron          | rs36588050 |
| 14:50818851-50818851 | upstream gene variant           | MODIFIER | Parp2   | ENSMUSG00000036023  | Transcript        | ENSMUST00000228833 | retained intron          | rs36588050 |
| 14:50818851-50818851 | upstream gene variant           | MODIFIER | Parp2   | ENSMUSG00000036023  | Transcript        | ENSMUST00000228872 | retained intron          | rs36588050 |
| 14:50819902-50819902 | downstream gene variant         | MODIFIER | Tep1    | ENSMUSG00000006281  | Transcript        | ENSMUST00000006444 | protein coding           | rs30602072 |
| 14:50819902-50819902 | intron_variant                  | MODIFIER | Parp2   | ENSMUSG00000036023  | Transcript        | ENSMUST00000036126 | protein coding           | rs30602072 |
| 14:50819902-50819902 | downstream_gene_variant         | MODIFIER | Tep1    | ENSMUSG00000006281  | Transcript        | ENSMUST00000226222 | protein coding           | rs30602072 |
| 14:50819902-50819902 | downstream_gene_variant         | MODIFIER | Tep1    | ENSMUSG00000006281  | Transcript        | ENSMUST00000226430 | nonsense_mediated_decay  | rs30602072 |
| 14:50819902-50819902 | downstream gene variant         | MODIFIER | Parp2   | ENSMUSG00000036023  | Transcript        | ENSMUST00000226880 | retained intron          | rs30602072 |
| 14:50819902-50819902 | downstream gene variant         | MODIFIER | Parp2   | ENSMUSG00000036023  | Transcript        | ENSMUST00000227810 | nonsense mediated decay  | rs30602072 |
| 14:50819902-50819902 | downstream gene variant         | MODIFIER | Parp2   | ENSMUSG00000036023  | Transcript        | ENSMUST00000228624 | retained intron          | rs30602072 |
| 14:50819902-50819902 | intron_variant,non_coding_trans | MODIFIER | Parp2   | ENSMUSG00000036023  | Transcript        | ENSMUST00000228672 | retained_intron          | rs30602072 |
| 14:50819902-50819902 | downstream_gene_variant         | MODIFIER | Parp2   | ENSMUSG00000036023  | Transcript        | ENSMUST00000228833 | retained_intron          | rs30602072 |
| 14:50819902-50819902 | upstream_gene_variant           | MODIFIER | Parp2   | ENSMUSG00000036023  | Transcript        | ENSMUST00000228872 | retained_intron          | rs30602072 |
| 14:50834793-50834793 | intron variant                  | MODIFIER | Tep1    | ENSMUSG00000006281  | Transcript        | ENSMUST00000006444 | protein coding           | rs52528866 |
| 14:50834793-50834793 | intron variant,NMD transcript v | MODIFIER | Tep1    | ENSMUSG00000006281  | Transcript        | ENSMUST00000226430 | nonsense mediated decay  | rs52528866 |
| 14:50834793-50834793 | intron_variant,non_coding_trans | MODIFIER | Tep1    | ENSMUSG00000006281  | Transcript        | ENSMUST00000227193 | processed transcript     | rs52528866 |
| 14:50834793-50834793 | upstream gene variant           | MODIFIER | Tep1    | ENSMUSG00000006281  | Transcript        | ENSMUST00000227228 | retained intron          | rs52528866 |
| 14:50834793-50834793 | upstream_gene_variant           | MODIFIER | Tep1    | ENSMUSG00000006281  | Transcript        | ENSMUST00000227526 | nonsense_mediated_decay  | rs52528866 |
| 14:50834793-50834793 | upstream_gene_variant           | MODIFIER | Tep1    | ENSMUSG00000006281  | Transcript        | ENSMUST00000228562 | retained_intron          | rs52528866 |
| 14:50834793-50834793 | regulatory_region_variant       | MODIFIER | -       | -                   | RegulatoryFeature | ENSMUSR00000560348 | promoter_flanking_region | rs52528866 |
| 14:50872593-50872593 | upstream gene variant           | MODIFIER | Tep1    | ENSMUSG00000006281  | Transcript        | ENSMUST00000006444 | protein coding           | rs31043266 |
| 14:50872593-50872593 | intron_variant,non_coding_trans | MODIFIER | Gm26782 | ENSMUSG000000097431 | Transcript        | ENSMUST00000181482 | antisense                | rs31043266 |
| 14:50872593-50872593 | intron variant,non_coding_trans | MODIFIER | Gm26782 | ENSMUSG000000097431 | Transcript        | ENSMUST00000181697 | antisense                | rs31043266 |
| 14:50872593-50872593 | intron_variant,non_coding_trans | MODIFIER | Gm26782 | ENSMUSG000000097431 | Transcript        | ENSMUST00000227103 | antisense                | rs31043266 |
| 14:50872593-50872593 | non_coding_transcript_exon_var  | MODIFIER | Gm26782 | ENSMUSG000000097431 | Transcript        | ENSMUST00000227207 | antisense                | rs31043266 |
| 14:50872593-50872593 | intron_variant,non_coding_trans | MODIFIER | Gm26782 | ENSMUSG000000097431 | Transcript        | ENSMUST00000227351 | antisense                | rs31043266 |
| 14:50872593-50872593 | intron variant,non_coding_trans | MODIFIER | Gm26782 | ENSMUSG000000097431 | Transcript        | ENSMUST00000228078 | antisense                | rs31043266 |
| 14:50872593-50872593 | downstream gene variant         | MODIFIER | Gm26782 | ENSMUSG000000097431 | Transcript        | ENSMUST00000228254 | antisense                | rs31043266 |
| 14:50889348-50889348 | downstream gene variant         | MODIFIER | Klh133  | ENSMUSG00000090799  | Transcript        | ENSMUST00000164415 | protein coding           | rs30772827 |
| 14:50889348-50889348 | 3 prime UTR variant             | MODIFIER | Klh133  | ENSMUSG00000090799  | Transcript        | ENSMUST00000227271 | protein coding           | rs30772827 |
| 14:50889350-50889350 | downstream_gene_variant         | MODIFIER | Klh133  | ENSMUSG00000090799  | Transcript        | ENSMUST00000164415 | protein_coding           | rs30830784 |
| 14:50889350-50889350 | 3_prime_UTR_variant             | MODIFIER | Klh133  | ENSMUSG00000090799  | Transcript        | ENSMUST00000227271 | protein_coding           | rs30830784 |
| 14:50912689-50912689 | downstream_gene_variant         | MODIFIER | Osgpe   | ENSMUSG00000006289  | Transcript        | ENSMUST00000006452 | nonsense_mediated_decay  | rs49562514 |
| 14:50912689-50912689 | downstream gene variant         | MODIFIER | Osgpe   | ENSMUSG00000006289  | Transcript        | ENSMUST00000159292 | protein coding           | rs49562514 |
| 14:50912689-50912689 | downstream gene variant         | MODIFIER | Osgpe   | ENSMUSG00000006289  | Transcript        | ENSMUST00000160375 | protein coding           | rs49562514 |
| 14:50912689-50912689 | intron_variant,NMD transcript v | MODIFIER | Osgpe   | ENSMUSG00000006289  | Transcript        | ENSMUST00000160393 | nonsense mediated decay  | rs49562514 |
| 14:50912689-50912689 | downstream_gene_variant         | MODIFIER | Osgpe   | ENSMUSG00000006289  | Transcript        | ENSMUST00000160464 | retained_intron          | rs49562514 |
| 14:50912689-50912689 | downstream_gene_variant         | MODIFIER | Osgpe   | ENSMUSG00000006289  | Transcript        | ENSMUST00000160890 | nonsense_mediated_decay  | rs49562514 |
| 14:50912689-50912689 | downstream_gene_variant         | MODIFIER | Osgpe   | ENSMUSG00000006289  | Transcript        | ENSMUST00000162177 | protein_coding           | rs49562514 |
| 14:50912689-50912689 | downstream gene variant         | MODIFIER | Osgpe   | ENSMUSG00000006289  | Transcript        | ENSMUST00000162850 | retained intron          | rs49562514 |
| 14:50914661-50914661 | downstream gene variant         | MODIFIER | Osgpe   | ENSMUSG00000006289  | Transcript        | ENSMUST00000006452 | nonsense mediated decay  | rs49078947 |
| 14:50914661-50914661 | upstream gene variant           | MODIFIER | Gm24689 | ENSMUSG00000088385  | Transcript        | ENSMUST00000157760 | snRNA                    | rs49078947 |
| 14:50914661-50914661 | 3 prime UTR variant             | MODIFIER | Osgpe   | ENSMUSG00000006289  | Transcript        | ENSMUST00000159292 | protein coding           | rs49078947 |
| 14:50914661-50914661 | downstream_gene_variant         | MODIFIER | Osgpe   | ENSMUSG00000006289  | Transcript        | ENSMUST00000160375 | protein_coding           | rs49078947 |
| 14:50914661-50914661 | intron_variant,NMD_transcript_v | MODIFIER | Osgpe   | ENSMUSG00000006289  | Transcript        | ENSMUST00000160393 | nonsense_mediated_decay  | rs49078947 |
| 14:50914661-50914661 | downstream_gene_variant         | MODIFIER | Osgpe   | ENSMUSG00000006289  | Transcript        | ENSMUST00000160464 | retained_intron          | rs49078947 |
| 14:50914661-50914661 | downstream gene variant         | MODIFIER | Osgpe   | ENSMUSG00000006289  | Transcript        | ENSMUST00000160890 | nonsense mediated decay  | rs49078947 |
| 14:50914661-50914661 | downstream_gene_variant         | MODIFIER | Osgpe   | ENSMUSG00000006289  | Transcript        | ENSMUST00000162177 | protein coding           | rs49078947 |
| 14:50914661-50914661 | downstream gene variant         | MODIFIER | Osgpe   | ENSMUSG00000006289  | Transcript        | ENSMUST00000162850 | retained intron          | rs49078947 |
| 14:50914661-50914661 | downstream gene variant         | MODIFIER | Osgpe   | ENSMUSG00000006289  | Transcript        | ENSMUST00000162850 | retained intron          | rs49078947 |
| 14:50920311-50920311 | intron_variant,NMD_transcript_v | MODIFIER | Osgpe   | ENSMUSG00000006289  | Transcript        | ENSMUST00000006452 | nonsense_mediated_decay  | rs31295874 |
| 14:50920311-50920311 | upstream_gene_variant           | MODIFIER | Apex1   | ENSMUSG00000035960  | Transcript        | ENSMUST00000049411 | protein_coding           | rs31295874 |
| 14:50920311-50920311 | upstream_gene_variant           | MODIFIER | Apex1   | ENSMUSG00000035960  | Transcript        | ENSMUST00000128395 | protein_coding           | rs31295874 |
| 14:50920311-50920311 | upstream gene variant           | MODIFIER | Apex1   | ENSMUSG00000035960  | Transcript        | ENSMUST00000136753 | protein coding           | rs31295874 |
| 14:50920311-50920311 | upstream gene variant           | MODIFIER | Apex1   | ENSMUSG00000035960  | Transcript        | ENSMUST00000154288 | protein coding           | rs31295874 |
| 14:50920311-50920311 | downstream gene variant         | MODIFIER | Gm24689 | ENSMUSG00000088385  | Transcript        | ENSMUST00000157760 | snRNA                    | rs31295874 |
| 14:50920311-50920311 | intron variant                  | MODIFIER | Osgpe   | ENSMUSG00000006289  | Transcript        | ENSMUST00000159292 | protein coding           | rs31295874 |
| 14:50920311-50920311 | intron_variant                  | MODIFIER | Osgpe   | ENSMUSG00000006289  | Transcript        | ENSMUST00000160375 | protein_coding           | rs31295874 |
| 14:50920311-50920311 | intron_variant,NMD_transcript_v | MODIFIER | Osgpe   | ENSMUSG00000006289  | Transcript        | ENSMUST00000160393 | nonsense_mediated_decay  | rs31295874 |
| 14:50920311-50920311 | intron_variant,non_coding_trans | MODIFIER | Osgpe   | ENSMUSG00000006289  | Transcript        | ENSMUST00000160464 | retained_intron          | rs31295874 |



|                      |                                 |          |         |                    |                   |                    |                         |             |
|----------------------|---------------------------------|----------|---------|--------------------|-------------------|--------------------|-------------------------|-------------|
| 14:50930469-50930469 | upstream gene variant           | MODIFIER | Pip4p1  | ENSMUSG00000035953 | Transcript        | ENSMUST00000159047 | retained intron         | rs3673597   |
| 14:50930469-50930469 | intron_variant,non_coding_trans | MODIFIER | Pip4p1  | ENSMUSG00000035953 | Transcript        | ENSMUST00000159745 | retained_intron         | rs3673597   |
| 14:50930469-50930469 | intron_variant                  | MODIFIER | Pip4p1  | ENSMUSG00000035953 | Transcript        | ENSMUST00000160538 | protein_coding          | rs3673597   |
| 14:50930469-50930469 | intron_variant                  | MODIFIER | Pip4p1  | ENSMUSG00000035953 | Transcript        | ENSMUST00000160835 | protein_coding          | rs3673597   |
| 14:50930469-50930469 | intron variant                  | MODIFIER | Pip4p1  | ENSMUSG00000035953 | Transcript        | ENSMUST00000161166 | protein_coding          | rs3673597   |
| 14:50930469-50930469 | upstream gene variant           | MODIFIER | Pip4p1  | ENSMUSG00000035953 | Transcript        | ENSMUST00000161699 | protein_coding          | rs3673597   |
| 14:50930469-50930469 | intron variant,non_coding_trans | MODIFIER | Pip4p1  | ENSMUSG00000035953 | Transcript        | ENSMUST00000162935 | retained intron         | rs3673597   |
| 14:50930469-50930469 | intron_variant                  | MODIFIER | Pip4p1  | ENSMUSG00000035953 | Transcript        | ENSMUST00000162957 | protein_coding          | rs3673597   |
| 14:50930469-50930469 | intron_variant,non_coding_trans | MODIFIER | Pip4p1  | ENSMUSG00000035953 | Transcript        | ENSMUST00000163043 | retained_intron         | rs3673597   |
| 14:50930469-50930469 | intron_variant,non_coding_trans | MODIFIER | Pip4p1  | ENSMUSG00000035953 | Transcript        | ENSMUST00000163088 | retained_intron         | rs3673597   |
| 14:50930469-50930469 | upstream gene variant           | MODIFIER | Pnp     | ENSMUSG00000115338 | Transcript        | ENSMUST00000226871 | protein_coding          | rs3673597   |
| 14:50930469-50930469 | regulatory region variant       | MODIFIER | -       | -                  | RegulatoryFeature | ENSMUSR00000087192 | promoter                | rs3673597   |
| 14:50948729-50948729 | intron variant                  | MODIFIER | Pnp     | ENSMUSG00000115338 | Transcript        | ENSMUST00000048615 | protein_coding          | rs45639627  |
| 14:50948729-50948729 | intron variant                  | MODIFIER | Pnp     | ENSMUSG00000115338 | Transcript        | ENSMUST00000178092 | protein_coding          | rs45639627  |
| 14:50948729-50948729 | downstream_gene_variant         | MODIFIER | Gm38316 | ENSMUSG00000103730 | Transcript        | ENSMUST00000194838 | TEC                     | rs45639627  |
| 14:50948729-50948729 | intron_variant                  | MODIFIER | Pnp     | ENSMUSG00000115338 | Transcript        | ENSMUST00000226871 | protein_coding          | rs45639627  |
| 14:50948729-50948729 | intron_variant                  | MODIFIER | Gm49342 | ENSMUSG00000021871 | Transcript        | ENSMUST00000227052 | protein_coding          | rs45639627  |
| 14:50948729-50948729 | intron variant,non_coding_trans | MODIFIER | Pnp     | ENSMUSG00000115338 | Transcript        | ENSMUST00000228631 | processed transcript    | rs45639627  |
| 14:50948729-50948729 | downstream gene variant         | MODIFIER | Pnp     | ENSMUSG00000115338 | Transcript        | ENSMUST00000228712 | retained intron         | rs45639627  |
| 14:50948734-50948734 | intron variant                  | MODIFIER | Pnp     | ENSMUSG00000115338 | Transcript        | ENSMUST00000048615 | protein_coding          | rs47494078  |
| 14:50948734-50948734 | intron_variant                  | MODIFIER | Pnp     | ENSMUSG00000115338 | Transcript        | ENSMUST00000178092 | protein_coding          | rs47494078  |
| 14:50948734-50948734 | downstream_gene_variant         | MODIFIER | Gm38316 | ENSMUSG00000103730 | Transcript        | ENSMUST00000194838 | TEC                     | rs47494078  |
| 14:50948734-50948734 | intron_variant                  | MODIFIER | Pnp     | ENSMUSG00000115338 | Transcript        | ENSMUST00000226871 | protein_coding          | rs47494078  |
| 14:50948734-50948734 | intron variant                  | MODIFIER | Gm49342 | ENSMUSG00000021871 | Transcript        | ENSMUST00000227052 | protein_coding          | rs47494078  |
| 14:50948734-50948734 | intron variant,non_coding_trans | MODIFIER | Pnp     | ENSMUSG00000115338 | Transcript        | ENSMUST00000228631 | processed transcript    | rs47494078  |
| 14:50948734-50948734 | downstream gene variant         | MODIFIER | Pnp     | ENSMUSG00000115338 | Transcript        | ENSMUST00000228712 | retained intron         | rs47494078  |
| 14:51096436-51096436 | intron variant                  | MODIFIER | Rnase4  | ENSMUSG00000021876 | Transcript        | ENSMUST00000022428 | protein_coding          | rs30894662  |
| 14:51096436-51096436 | 5_prime_UTR_variant             | MODIFIER | Ang     | ENSMUSG00000072115 | Transcript        | ENSMUST00000069011 | protein_coding          | rs30894662  |
| 14:51096436-51096436 | 5_prime_UTR_variant             | MODIFIER | Rnase4  | ENSMUSG00000021876 | Transcript        | ENSMUST00000169895 | protein_coding          | rs30894662  |
| 14:51096436-51096436 | intron variant                  | MODIFIER | Ang     | ENSMUSG00000072115 | Transcript        | ENSMUST00000171688 | protein_coding          | rs30894662  |
| 14:51096436-51096436 | regulatory region variant       | MODIFIER | -       | -                  | RegulatoryFeature | ENSMUSR00000347558 | promoter                | rs30894662  |
| 14:51101915-51101915 | intron variant                  | MODIFIER | Rnase4  | ENSMUSG00000021876 | Transcript        | ENSMUST00000022428 | protein_coding          | rs3023408   |
| 14:51101915-51101915 | 3 prime UTR variant             | MODIFIER | Ang     | ENSMUSG00000072115 | Transcript        | ENSMUST00000069011 | protein_coding          | rs3023408   |
| 14:51101915-51101915 | intron_variant                  | MODIFIER | Rnase4  | ENSMUSG00000021876 | Transcript        | ENSMUST00000169895 | protein_coding          | rs3023408   |
| 14:51101915-51101915 | 3_prime_UTR_variant             | MODIFIER | Ang     | ENSMUSG00000072115 | Transcript        | ENSMUST00000171688 | protein_coding          | rs3023408   |
| 14:52016344-52016344 | intron_variant                  | MODIFIER | Zfp219  | ENSMUSG00000049295 | Transcript        | ENSMUST00000067549 | protein_coding          | rs212743314 |
| 14:52016344-52016344 | upstream gene variant           | MODIFIER | Tmem253 | ENSMUSG00000072571 | Transcript        | ENSMUST00000100638 | protein_coding          | rs212743314 |
| 14:52016344-52016344 | intron variant                  | MODIFIER | Zfp219  | ENSMUSG00000049295 | Transcript        | ENSMUST00000166169 | protein_coding          | rs212743314 |
| 14:52016344-52016344 | intron variant,non_coding_trans | MODIFIER | Tmem253 | ENSMUSG00000072571 | Transcript        | ENSMUST00000226268 | processed transcript    | rs212743314 |
| 14:52016344-52016344 | upstream gene variant           | MODIFIER | Zfp219  | ENSMUSG00000049295 | Transcript        | ENSMUST00000226522 | protein_coding          | rs212743314 |
| 14:52016344-52016344 | upstream_gene_variant           | MODIFIER | Zfp219  | ENSMUSG00000049295 | Transcript        | ENSMUST00000226522 | protein_coding          | rs212743314 |
| 14:52016344-52016344 | intron_variant                  | MODIFIER | Zfp219  | ENSMUSG00000049295 | Transcript        | ENSMUST00000226554 | protein_coding          | rs212743314 |
| 14:52016344-52016344 | intron_variant                  | MODIFIER | Zfp219  | ENSMUSG00000049295 | Transcript        | ENSMUST00000226605 | protein_coding          | rs212743314 |
| 14:52016344-52016344 | upstream gene variant           | MODIFIER | Gm49086 | ENSMUSG00000115454 | Transcript        | ENSMUST00000226970 | antisense               | rs212743314 |
| 14:52016344-52016344 | upstream gene variant           | MODIFIER | Tmem253 | ENSMUSG00000072571 | Transcript        | ENSMUST00000227295 | protein_coding          | rs212743314 |
| 14:52016344-52016344 | intron variant,non_coding_trans | MODIFIER | Zfp219  | ENSMUSG00000049295 | Transcript        | ENSMUST00000227420 | processed transcript    | rs212743314 |
| 14:52016344-52016344 | upstream_gene_variant           | MODIFIER | Zfp219  | ENSMUSG00000049295 | Transcript        | ENSMUST00000228051 | protein_coding          | rs212743314 |
| 14:52016344-52016344 | intron_variant                  | MODIFIER | Zfp219  | ENSMUSG00000049295 | Transcript        | ENSMUST00000228162 | protein_coding          | rs212743314 |
| 14:52016344-52016344 | upstream_gene_variant           | MODIFIER | Tmem253 | ENSMUSG00000072571 | Transcript        | ENSMUST00000228408 | protein_coding          | rs212743314 |
| 14:52016344-52016344 | intron variant                  | MODIFIER | Zfp219  | ENSMUSG00000049295 | Transcript        | ENSMUST00000228580 | protein_coding          | rs212743314 |
| 14:52272390-52272390 | intron variant                  | MODIFIER | Rab2b   | ENSMUSG00000022159 | Transcript        | ENSMUST00000022765 | protein_coding          | rs30398574  |
| 14:52272390-52272390 | intron variant                  | MODIFIER | Rab2b   | ENSMUSG00000022159 | Transcript        | ENSMUST00000100631 | protein_coding          | rs30398574  |
| 14:52272390-52272390 | upstream gene variant           | MODIFIER | Gm23758 | ENSMUSG00000088979 | Transcript        | ENSMUST00000158354 | snoRNA                  | rs30398574  |
| 14:52272390-52272390 | intron_variant                  | MODIFIER | Rab2b   | ENSMUSG00000022159 | Transcript        | ENSMUST00000167116 | protein_coding          | rs30398574  |
| 14:52272390-52272390 | intron_variant,NMD_transcript_v | MODIFIER | Rab2b   | ENSMUSG00000022159 | Transcript        | ENSMUST00000172488 | nonsense_mediated_decay | rs30398574  |
| 14:52272390-52272390 | intron_variant,NMD_transcript_v | MODIFIER | Rab2b   | ENSMUSG00000022159 | Transcript        | ENSMUST00000172634 | nonsense_mediated_decay | rs30398574  |
| 14:52272390-52272390 | intron variant,non_coding_trans | MODIFIER | Rab2b   | ENSMUSG00000022159 | Transcript        | ENSMUST00000173046 | processed transcript    | rs30398574  |
| 14:52272390-52272390 | intron variant,NMD_transcript_v | MODIFIER | Rab2b   | ENSMUSG00000022159 | Transcript        | ENSMUST00000174020 | nonsense mediated decay | rs30398574  |
| 14:52272390-52272390 | upstream gene variant           | MODIFIER | Rab2b   | ENSMUSG00000022159 | Transcript        | ENSMUST00000174585 | retained intron         | rs30398574  |
| 14:52273706-52273706 | intron_variant                  | MODIFIER | Rab2b   | ENSMUSG00000022159 | Transcript        | ENSMUST00000022765 | protein_coding          | rs48351748  |
| 14:52273706-52273706 | intron_variant                  | MODIFIER | Rab2b   | ENSMUSG00000022159 | Transcript        | ENSMUST00000100631 | protein_coding          | rs48351748  |
| 14:52273706-52273706 | upstream_gene_variant           | MODIFIER | Gm23758 | ENSMUSG00000088979 | Transcript        | ENSMUST00000158354 | snoRNA                  | rs48351748  |
| 14:52273706-52273706 | intron variant                  | MODIFIER | Rab2b   | ENSMUSG00000022159 | Transcript        | ENSMUST00000167116 | protein_coding          | rs48351748  |
| 14:52273706-52273706 | intron variant,NMD_transcript_v | MODIFIER | Rab2b   | ENSMUSG00000022159 | Transcript        | ENSMUST00000172488 | nonsense mediated decay | rs48351748  |
| 14:52273706-52273706 | intron variant,NMD_transcript_v | MODIFIER | Rab2b   | ENSMUSG00000022159 | Transcript        | ENSMUST00000172634 | nonsense mediated decay | rs48351748  |
| 14:52273706-52273706 | intron variant,non_coding_trans | MODIFIER | Rab2b   | ENSMUSG00000022159 | Transcript        | ENSMUST00000173046 | processed transcript    | rs48351748  |
| 14:52273706-52273706 | intron_variant,NMD_transcript_v | MODIFIER | Rab2b   | ENSMUSG00000022159 | Transcript        | ENSMUST00000174020 | nonsense_mediated_decay | rs48351748  |
| 14:52273706-52273706 | upstream_gene_variant           | MODIFIER | Rab2b   | ENSMUSG00000022159 | Transcript        | ENSMUST00000174585 | retained_intron         | rs48351748  |
| 14:52297251-52297251 | downstream_gene_variant         | MODIFIER | Tox4    | ENSMUSG00000016831 | Transcript        | ENSMUST00000022766 | protein_coding          | rs48774859  |

|                      |                                 |          |               |                     |                   |                     |                         |             |
|----------------------|---------------------------------|----------|---------------|---------------------|-------------------|---------------------|-------------------------|-------------|
| 14:52297251-52297251 | intron variant                  | MODIFIER | Mettl3        | ENSMUSG00000022160  | Transcript        | ENSMUST00000022767  | protein coding          | rs48774859  |
| 14:52297251-52297251 | 3_prime_UTR_variant,NMD_trar    | MODIFIER | Mettl3        | ENSMUSG00000022160  | Transcript        | ENSMUST00000122962  | nonsense mediated decay | rs48774859  |
| 14:52297251-52297251 | non_coding_transcript_exon_var  | MODIFIER | Mettl3        | ENSMUSG00000022160  | Transcript        | ENSMUST00000127797  | retained_intron         | rs48774859  |
| 14:52297251-52297251 | upstream_gene_variant           | MODIFIER | Mettl3        | ENSMUSG00000022160  | Transcript        | ENSMUST00000130550  | retained_intron         | rs48774859  |
| 14:52297251-52297251 | downstream gene variant         | MODIFIER | Mettl3        | ENSMUSG00000022160  | Transcript        | ENSMUST00000145875  | nonsense mediated decay | rs48774859  |
| 14:52297251-52297251 | intron variant,NMD transcript v | MODIFIER | Mettl3        | ENSMUSG00000022160  | Transcript        | ENSMUST00000147768  | nonsense mediated decay | rs48774859  |
| 14:52297251-52297251 | downstream gene variant         | MODIFIER | Tox4          | ENSMUSG00000016831  | Transcript        | ENSMUST00000152493  | retained_intron         | rs48774859  |
| 14:52297251-52297251 | intron_variant,non_coding_trans | MODIFIER | Mettl3        | ENSMUSG00000022160  | Transcript        | ENSMUST00000156611  | retained_intron         | rs48774859  |
| 14:52297251-52297251 | downstream_gene_variant         | MODIFIER | Mettl3        | ENSMUSG00000022160  | Transcript        | ENSMUST00000173138  | nonsense mediated decay | rs48774859  |
| 14:52297251-52297251 | upstream_gene_variant           | MODIFIER | Mettl3        | ENSMUSG00000022160  | Transcript        | ENSMUST00000173564  | retained_intron         | rs48774859  |
| 14:52297251-52297251 | upstream gene variant           | MODIFIER | Mettl3        | ENSMUSG00000022160  | Transcript        | ENSMUST00000173656  | protein coding          | rs48774859  |
| 14:52297251-52297251 | downstream gene variant         | MODIFIER | Mettl3        | ENSMUSG00000022160  | Transcript        | ENSMUST00000173896  | nonsense mediated decay | rs48774859  |
| 14:52297251-52297251 | intron variant,NMD transcript v | MODIFIER | Mettl3        | ENSMUSG00000022160  | Transcript        | ENSMUST00000174351  | nonsense mediated decay | rs48774859  |
| 14:52297251-52297251 | upstream gene variant           | MODIFIER | Mettl3        | ENSMUSG00000022160  | Transcript        | ENSMUST00000174360  | protein coding          | rs48774859  |
| 14:52297251-52297251 | downstream_gene_variant         | MODIFIER | Mettl3        | ENSMUSG00000022160  | Transcript        | ENSMUST00000174853  | protein coding          | rs48774859  |
| 14:52311921-52311921 | 3_prime_UTR_variant             | MODIFIER | Sall2         | ENSMUSG00000049532  | Transcript        | ENSMUST00000058326  | protein coding          | rs30318417  |
| 14:52311921-52311921 | 3_prime_UTR_variant             | MODIFIER | Sall2         | ENSMUSG00000049532  | Transcript        | ENSMUST00000135523  | protein coding          | rs30318417  |
| 14:52311921-52311921 | regulatory region variant       | MODIFIER | -             | -                   | RegulatoryFeature | ENSMUSR000000560522 | CTCF binding site       | rs30318417  |
| 14:53797738-53797738 | downstream gene variant         | MODIFIER | B230359F08Rik | ENSMUSG00000087666  | Transcript        | ENSMUST00000103671  | TR V gene               | rs3140307   |
| 14:54139709-54139709 | downstream gene variant         | MODIFIER | Trid2         | ENSMUSG00000076871  | Transcript        | ENSMUST00000103683  | TR J gene               | rs3021908   |
| 14:54139709-54139709 | upstream_gene_variant           | MODIFIER | Trdc          | ENSMUSG00000104876  | Transcript        | ENSMUST00000196323  | TR_C_gene               | rs3021908   |
| 14:54139709-54139709 | intron_variant,non_coding_trans | MODIFIER | Gm43434       | ENSMUSG00000106112  | Transcript        | ENSMUST00000196615  | antisense               | rs3021908   |
| 14:54236847-54236847 | intron_variant                  | MODIFIER | Dad1          | ENSMUSG00000022174  | Transcript        | ENSMUST00000022781  | protein coding          | rs48352027  |
| 14:54236847-54236847 | downstream gene variant         | MODIFIER | Dad1          | ENSMUSG00000022174  | Transcript        | ENSMUST00000128231  | protein coding          | rs48352027  |
| 14:54507977-54507977 | intron variant                  | MODIFIER | Prmt5         | ENSMUSG00000023110  | Transcript        | ENSMUST00000023873  | protein coding          | rs30639676  |
| 14:54507977-54507977 | downstream gene variant         | MODIFIER | Prmt5         | ENSMUSG00000023110  | Transcript        | ENSMUST00000132227  | nonsense mediated decay | rs30639676  |
| 14:54507977-54507977 | downstream gene variant         | MODIFIER | Prmt5         | ENSMUSG00000023110  | Transcript        | ENSMUST00000139964  | protein coding          | rs30639676  |
| 14:54546803-54546803 | intron_variant                  | MODIFIER | Haus4         | ENSMUSG00000022177  | Transcript        | ENSMUST00000022784  | protein coding          | rs30965041  |
| 14:54546803-54546803 | upstream_gene_variant           | MODIFIER | Haus4         | ENSMUSG00000022177  | Transcript        | ENSMUST00000226250  | retained_intron         | rs30965041  |
| 14:54546803-54546803 | intron_variant                  | MODIFIER | Haus4         | ENSMUSG00000022177  | Transcript        | ENSMUST00000226358  | protein coding          | rs30965041  |
| 14:54546803-54546803 | upstream gene variant           | MODIFIER | Haus4         | ENSMUSG00000022177  | Transcript        | ENSMUST00000226832  | protein coding          | rs30965041  |
| 14:54546803-54546803 | intron_variant,non coding trans | MODIFIER | Haus4         | ENSMUSG00000022177  | Transcript        | ENSMUST00000227954  | retained_intron         | rs30965041  |
| 14:54546803-54546803 | downstream gene variant         | MODIFIER | Haus4         | ENSMUSG00000022177  | Transcript        | ENSMUST00000228883  | processed transcript    | rs30965041  |
| 14:54546817-54546818 | intron_variant                  | MODIFIER | Haus4         | ENSMUSG00000022177  | Transcript        | ENSMUST00000022784  | protein coding          | rs216861770 |
| 14:54546817-54546818 | upstream_gene_variant           | MODIFIER | Haus4         | ENSMUSG00000022177  | Transcript        | ENSMUST00000226250  | retained_intron         | rs216861770 |
| 14:54546817-54546818 | intron_variant                  | MODIFIER | Haus4         | ENSMUSG00000022177  | Transcript        | ENSMUST00000226358  | protein coding          | rs216861770 |
| 14:54546817-54546818 | upstream gene variant           | MODIFIER | Haus4         | ENSMUSG00000022177  | Transcript        | ENSMUST00000226832  | protein coding          | rs216861770 |
| 14:54546817-54546818 | intron_variant,non coding trans | MODIFIER | Haus4         | ENSMUSG00000022177  | Transcript        | ENSMUST00000227954  | retained_intron         | rs216861770 |
| 14:54546817-54546818 | downstream gene variant         | MODIFIER | Haus4         | ENSMUSG00000022177  | Transcript        | ENSMUST00000228883  | processed transcript    | rs216861770 |
| 14:54874388-54874388 | upstream gene variant           | MODIFIER | Homez         | ENSMUSG000000057156 | Transcript        | ENSMUST00000146642  | protein coding          | rs31224553  |
| 14:54874388-54874388 | downstream_gene_variant         | MODIFIER | Ppp1r3e       | ENSMUSG000000072494 | Transcript        | ENSMUST00000168622  | protein coding          | rs31224553  |
| 14:54874388-54874388 | intron_variant                  | MODIFIER | Ppp1r3e       | ENSMUSG000000072494 | Transcript        | ENSMUST00000177403  | protein coding          | rs31224553  |
| 14:54874388-54874388 | upstream_gene_variant           | MODIFIER | Ppp1r3e       | ENSMUSG000000072494 | Transcript        | ENSMUST00000182700  | processed transcript    | rs31224553  |
| 14:54874388-54874388 | downstream gene variant         | MODIFIER | Ppp1r3e       | ENSMUSG000000072494 | Transcript        | ENSMUST00000194094  | retained_intron         | rs31224553  |
| 14:54888907-54888907 | downstream gene variant         | MODIFIER | Bcl2l2        | ENSMUSG00000089682  | Transcript        | ENSMUST00000022806  | protein coding          | rs46731880  |
| 14:54888907-54888907 | downstream gene variant         | MODIFIER | Bcl2l2        | ENSMUSG00000089682  | Transcript        | ENSMUST00000131243  | retained_intron         | rs46731880  |
| 14:54888907-54888907 | downstream_gene_variant         | MODIFIER | Bcl2l2        | ENSMUSG00000089682  | Transcript        | ENSMUST00000133397  | protein coding          | rs46731880  |
| 14:54888907-54888907 | intron_variant                  | MODIFIER | Gm20521       | ENSMUSG00000092232  | Transcript        | ENSMUST00000134077  | protein coding          | rs46731880  |
| 14:54888907-54888907 | upstream_gene_variant           | MODIFIER | Pabpn1        | ENSMUSG00000022194  | Transcript        | ENSMUST00000140691  | protein coding          | rs46731880  |
| 14:54888907-54888907 | downstream gene variant         | MODIFIER | Bcl2l2        | ENSMUSG00000089682  | Transcript        | ENSMUST00000172844  | protein coding          | rs46731880  |
| 14:54888907-54888907 | downstream gene variant         | MODIFIER | Bcl2l2        | ENSMUSG00000089682  | Transcript        | ENSMUST00000227108  | protein coding          | rs46731880  |
| 14:54890393-54890393 | downstream gene variant         | MODIFIER | Bcl2l2        | ENSMUSG00000089682  | Transcript        | ENSMUST0000022806   | protein coding          | rs31039289  |
| 14:54890393-54890393 | upstream gene variant           | MODIFIER | Pabpn1        | ENSMUSG00000022194  | Transcript        | ENSMUST0000022808   | protein coding          | rs31039289  |
| 14:54890393-54890393 | upstream_gene_variant           | MODIFIER | Pabpn1        | ENSMUSG00000022194  | Transcript        | ENSMUST00000116476  | protein coding          | rs31039289  |
| 14:54890393-54890393 | downstream_gene_variant         | MODIFIER | Bcl2l2        | ENSMUSG00000089682  | Transcript        | ENSMUST00000133397  | protein coding          | rs31039289  |
| 14:54890393-54890393 | intron_variant                  | MODIFIER | Gm20521       | ENSMUSG00000092232  | Transcript        | ENSMUST00000134077  | protein coding          | rs31039289  |
| 14:54890393-54890393 | upstream gene variant           | MODIFIER | Pabpn1        | ENSMUSG00000022194  | Transcript        | ENSMUST00000139985  | protein coding          | rs31039289  |
| 14:54890393-54890393 | upstream gene variant           | MODIFIER | Pabpn1        | ENSMUSG00000022194  | Transcript        | ENSMUST00000140691  | protein coding          | rs31039289  |
| 14:54890393-54890393 | upstream gene variant           | MODIFIER | Pabpn1        | ENSMUSG00000022194  | Transcript        | ENSMUST00000227108  | protein coding          | rs31039289  |
| 14:54890393-54890393 | upstream_gene_variant           | MODIFIER | Pabpn1        | ENSMUSG00000022194  | Transcript        | ENSMUST0000022806   | protein coding          | rs31039289  |
| 14:54890393-54890393 | upstream_gene_variant           | MODIFIER | Pabpn1        | ENSMUSG00000022194  | Transcript        | ENSMUST00000150975  | retained_intron         | rs31039289  |
| 14:54890393-54890393 | upstream_gene_variant           | MODIFIER | Pabpn1        | ENSMUSG00000022194  | Transcript        | ENSMUST00000172557  | protein coding          | rs31039289  |
| 14:54890393-54890393 | upstream gene variant           | MODIFIER | Pabpn1        | ENSMUSG00000022194  | Transcript        | ENSMUST00000172695  | nonsense mediated decay | rs31039289  |
| 14:54890393-54890393 | downstream gene variant         | MODIFIER | Bcl2l2        | ENSMUSG00000089682  | Transcript        | ENSMUST00000172844  | protein coding          | rs31039289  |
| 14:54890870-54890870 | downstream gene variant         | MODIFIER | Bcl2l2        | ENSMUSG00000089682  | Transcript        | ENSMUST00000022806  | protein coding          | rs31540841  |
| 14:54890870-54890870 | upstream gene variant           | MODIFIER | Pabpn1        | ENSMUSG00000022194  | Transcript        | ENSMUST0000022808   | protein coding          | rs31540841  |
| 14:54890870-54890870 | upstream_gene_variant           | MODIFIER | Pabpn1        | ENSMUSG00000022194  | Transcript        | ENSMUST00000116476  | protein coding          | rs31540841  |
| 14:54890870-54890870 | downstream_gene_variant         | MODIFIER | Bcl2l2        | ENSMUSG00000089682  | Transcript        | ENSMUST00000133397  | protein coding          | rs31540841  |
| 14:54890870-54890870 | intron_variant                  | MODIFIER | Gm20521       | ENSMUSG00000092232  | Transcript        | ENSMUST00000134077  | protein coding          | rs31540841  |

|                      |                                 |          |          |                    |            |                    |                         |             |
|----------------------|---------------------------------|----------|----------|--------------------|------------|--------------------|-------------------------|-------------|
| 14:54890870-54890870 | upstream gene variant           | MODIFIER | Pabpn1   | ENSMUSG00000022194 | Transcript | ENSMUST00000139985 | protein coding          | rs31540841  |
| 14:54890870-54890870 | upstream_gene_variant           | MODIFIER | Pabpn1   | ENSMUSG00000022194 | Transcript | ENSMUST00000140691 | protein_coding          | rs31540841  |
| 14:54890870-54890870 | upstream_gene_variant           | MODIFIER | Pabpn1   | ENSMUSG00000022194 | Transcript | ENSMUST00000141446 | protein_coding          | rs31540841  |
| 14:54890870-54890870 | upstream_gene_variant           | MODIFIER | Pabpn1   | ENSMUSG00000022194 | Transcript | ENSMUST00000146271 | retained_intron         | rs31540841  |
| 14:54890870-54890870 | upstream gene variant           | MODIFIER | Pabpn1   | ENSMUSG00000022194 | Transcript | ENSMUST00000150975 | protein coding          | rs31540841  |
| 14:54890870-54890870 | upstream gene variant           | MODIFIER | Pabpn1   | ENSMUSG00000022194 | Transcript | ENSMUST00000172557 | protein coding          | rs31540841  |
| 14:54890870-54890870 | upstream gene variant           | MODIFIER | Pabpn1   | ENSMUSG00000022194 | Transcript | ENSMUST00000172695 | nonsense mediated decay | rs31540841  |
| 14:54891731-54891731 | downstream_gene_variant         | MODIFIER | Bcl2l2   | ENSMUSG00000089682 | Transcript | ENSMUST00000022806 | protein_coding          | rs211969829 |
| 14:54891731-54891731 | upstream_gene_variant           | MODIFIER | Pabpn1   | ENSMUSG00000022194 | Transcript | ENSMUST00000022808 | protein_coding          | rs211969829 |
| 14:54891731-54891731 | upstream_gene_variant           | MODIFIER | Pabpn1   | ENSMUSG00000022194 | Transcript | ENSMUST00000116476 | protein_coding          | rs211969829 |
| 14:54891731-54891731 | downstream gene variant         | MODIFIER | Bcl2l2   | ENSMUSG00000089682 | Transcript | ENSMUST00000133397 | protein coding          | rs211969829 |
| 14:54891731-54891731 | intron variant                  | MODIFIER | Gm20521  | ENSMUSG00000092232 | Transcript | ENSMUST00000134077 | protein coding          | rs211969829 |
| 14:54891731-54891731 | upstream gene variant           | MODIFIER | Pabpn1   | ENSMUSG00000022194 | Transcript | ENSMUST00000139985 | protein coding          | rs211969829 |
| 14:54891731-54891731 | upstream gene variant           | MODIFIER | Pabpn1   | ENSMUSG00000022194 | Transcript | ENSMUST00000140691 | protein coding          | rs211969829 |
| 14:54891731-54891731 | upstream_gene_variant           | MODIFIER | Pabpn1   | ENSMUSG00000022194 | Transcript | ENSMUST00000141446 | protein_coding          | rs211969829 |
| 14:54891731-54891731 | upstream_gene_variant           | MODIFIER | Pabpn1   | ENSMUSG00000022194 | Transcript | ENSMUST00000146271 | retained_intron         | rs211969829 |
| 14:54891731-54891731 | upstream_gene_variant           | MODIFIER | Pabpn1   | ENSMUSG00000022194 | Transcript | ENSMUST00000150975 | protein_coding          | rs211969829 |
| 14:54891731-54891731 | upstream gene variant           | MODIFIER | Pabpn1   | ENSMUSG00000022194 | Transcript | ENSMUST00000172557 | protein coding          | rs211969829 |
| 14:54891731-54891731 | upstream gene variant           | MODIFIER | Pabpn1   | ENSMUSG00000022194 | Transcript | ENSMUST00000172695 | nonsense mediated decay | rs211969829 |
| 14:54891843-54891843 | downstream gene variant         | MODIFIER | Bcl2l2   | ENSMUSG00000089682 | Transcript | ENSMUST00000022806 | protein coding          | rs236779742 |
| 14:54891843-54891843 | upstream_gene_variant           | MODIFIER | Pabpn1   | ENSMUSG00000022194 | Transcript | ENSMUST00000022808 | protein_coding          | rs236779742 |
| 14:54891843-54891843 | upstream_gene_variant           | MODIFIER | Pabpn1   | ENSMUSG00000022194 | Transcript | ENSMUST00000116476 | protein_coding          | rs236779742 |
| 14:54891843-54891843 | downstream_gene_variant         | MODIFIER | Bcl2l2   | ENSMUSG00000089682 | Transcript | ENSMUST00000133397 | protein_coding          | rs236779742 |
| 14:54891843-54891843 | intron variant                  | MODIFIER | Gm20521  | ENSMUSG00000092232 | Transcript | ENSMUST00000134077 | protein coding          | rs236779742 |
| 14:54891843-54891843 | upstream gene variant           | MODIFIER | Pabpn1   | ENSMUSG00000022194 | Transcript | ENSMUST00000139985 | protein coding          | rs236779742 |
| 14:54891843-54891843 | upstream gene variant           | MODIFIER | Pabpn1   | ENSMUSG00000022194 | Transcript | ENSMUST00000140691 | protein coding          | rs236779742 |
| 14:54891843-54891843 | upstream_gene_variant           | MODIFIER | Pabpn1   | ENSMUSG00000022194 | Transcript | ENSMUST00000141446 | protein_coding          | rs236779742 |
| 14:54891843-54891843 | upstream_gene_variant           | MODIFIER | Pabpn1   | ENSMUSG00000022194 | Transcript | ENSMUST00000146271 | retained_intron         | rs236779742 |
| 14:54891843-54891843 | upstream_gene_variant           | MODIFIER | Pabpn1   | ENSMUSG00000022194 | Transcript | ENSMUST00000150975 | protein_coding          | rs236779742 |
| 14:54891843-54891843 | upstream_gene_variant           | MODIFIER | Pabpn1   | ENSMUSG00000022194 | Transcript | ENSMUST00000172557 | protein_coding          | rs236779742 |
| 14:54891843-54891843 | upstream gene variant           | MODIFIER | Pabpn1   | ENSMUSG00000022194 | Transcript | ENSMUST00000172695 | nonsense mediated decay | rs236779742 |
| 14:55017172-55017172 | intron variant                  | MODIFIER | Ngdn     | ENSMUSG00000022204 | Transcript | ENSMUST00000022815 | protein coding          | rs49311004  |
| 14:55017172-55017172 | upstream gene variant           | MODIFIER | Ngdn     | ENSMUSG00000022204 | Transcript | ENSMUST00000226258 | retained intron         | rs49311004  |
| 14:55017172-55017172 | upstream_gene_variant           | MODIFIER | Ngdn     | ENSMUSG00000022204 | Transcript | ENSMUST00000226658 | retained_intron         | rs49311004  |
| 14:55017172-55017172 | upstream_gene_variant           | MODIFIER | Ngdn     | ENSMUSG00000022204 | Transcript | ENSMUST00000227833 | retained_intron         | rs49311004  |
| 14:55018244-55018244 | intron variant                  | MODIFIER | Ngdn     | ENSMUSG00000022204 | Transcript | ENSMUST00000022815 | protein_coding          | rs260858043 |
| 14:55018244-55018244 | upstream gene variant           | MODIFIER | Ngdn     | ENSMUSG00000022204 | Transcript | ENSMUST00000226258 | retained intron         | rs260858043 |
| 14:55018244-55018244 | upstream gene variant           | MODIFIER | Ngdn     | ENSMUSG00000022204 | Transcript | ENSMUST00000226658 | retained intron         | rs260858043 |
| 14:55018244-55018244 | upstream gene variant           | MODIFIER | Ngdn     | ENSMUSG00000022204 | Transcript | ENSMUST00000227833 | retained intron         | rs260858043 |
| 14:55022532-55022532 | intron variant                  | MODIFIER | Ngdn     | ENSMUSG00000022204 | Transcript | ENSMUST00000022815 | protein coding          | rs47102783  |
| 14:55022532-55022532 | downstream_gene_variant         | MODIFIER | Ngdn     | ENSMUSG00000022204 | Transcript | ENSMUST00000226258 | retained_intron         | rs47102783  |
| 14:55022532-55022532 | downstream_gene_variant         | MODIFIER | Ngdn     | ENSMUSG00000022204 | Transcript | ENSMUST00000226658 | retained_intron         | rs47102783  |
| 14:55022532-55022532 | downstream_gene_variant         | MODIFIER | Ngdn     | ENSMUSG00000022204 | Transcript | ENSMUST00000227833 | retained_intron         | rs47102783  |
| 14:55067573-55067573 | synonymous variant              | LOW      | Zfx2     | ENSMUSG00000040721 | Transcript | ENSMUST00000036328 | protein coding          | rs31339308  |
| 14:55067573-55067573 | non coding transcript exon var  | MODIFIER | Zfx2     | ENSMUSG00000040721 | Transcript | ENSMUST00000176665 | retained intron         | rs31339308  |
| 14:55067573-55067573 | intron variant,non coding trans | MODIFIER | Zfx2os   | ENSMUSG00000093452 | Transcript | ENSMUST00000183750 | antisense               | rs31339308  |
| 14:55067573-55067573 | intron_variant,non_coding_trans | MODIFIER | Gm20687  | ENSMUSG00000100162 | Transcript | ENSMUST00000183822 | antisense               | rs31339308  |
| 14:55067573-55067573 | intron_variant,non_coding_trans | MODIFIER | Gm20687  | ENSMUSG00000100162 | Transcript | ENSMUST00000183993 | antisense               | rs31339308  |
| 14:55067573-55067573 | intron_variant,non_coding_trans | MODIFIER | Gm20687  | ENSMUSG00000100162 | Transcript | ENSMUST00000185121 | antisense               | rs31339308  |
| 14:55068120-55068120 | synonymous variant              | LOW      | Zfx2     | ENSMUSG00000040721 | Transcript | ENSMUST00000036328 | protein coding          | rs47182693  |
| 14:55068120-55068120 | non coding transcript exon var  | MODIFIER | Zfx2     | ENSMUSG00000040721 | Transcript | ENSMUST00000176665 | retained intron         | rs47182693  |
| 14:55068120-55068120 | intron variant,non coding trans | MODIFIER | Zfx2os   | ENSMUSG00000093452 | Transcript | ENSMUST00000183750 | antisense               | rs47182693  |
| 14:55068120-55068120 | intron variant,non coding trans | MODIFIER | Gm20687  | ENSMUSG00000100162 | Transcript | ENSMUST00000183822 | antisense               | rs47182693  |
| 14:55068120-55068120 | intron_variant,non_coding_trans | MODIFIER | Gm20687  | ENSMUSG00000100162 | Transcript | ENSMUST00000183993 | antisense               | rs47182693  |
| 14:55068120-55068120 | intron_variant,non_coding_trans | MODIFIER | Gm20687  | ENSMUSG00000100162 | Transcript | ENSMUST00000185121 | antisense               | rs47182693  |
| 14:61612683-61612683 | 3_prime_UTR_variant             | MODIFIER | Kcnrg    | ENSMUSG00000046168 | Transcript | ENSMUST00000051184 | protein_coding          | rs30462687  |
| 14:61612683-61612683 | intron variant,non coding trans | MODIFIER | Dleu2    | ENSMUSG00000097589 | Transcript | ENSMUST00000182259 | lincRNA                 | rs30462687  |
| 14:61612683-61612683 | intron variant,non coding trans | MODIFIER | Dleu2    | ENSMUSG00000097589 | Transcript | ENSMUST00000182325 | lincRNA                 | rs30462687  |
| 14:61612683-61612683 | intron variant,non coding trans | MODIFIER | Dleu2    | ENSMUSG00000097589 | Transcript | ENSMUST00000182768 | lincRNA                 | rs30462687  |
| 14:61612683-61612683 | intron_variant,non_coding_trans | MODIFIER | Dleu2    | ENSMUSG00000097589 | Transcript | ENSMUST00000183054 | lincRNA                 | rs30462687  |
| 14:61612683-61612683 | intron_variant,non_coding_trans | MODIFIER | Dleu2    | ENSMUSG00000097589 | Transcript | ENSMUST00000183066 | lincRNA                 | rs30462687  |
| 14:61612683-61612683 | 3_prime_UTR_variant             | MODIFIER | Kcnrg    | ENSMUSG00000046168 | Transcript | ENSMUST00000225582 | protein_coding          | rs30462687  |
| 14:62693850-62693850 | intron variant                  | MODIFIER | Ints6    | ENSMUSG00000035161 | Transcript | ENSMUST00000053959 | protein coding          | rs45951550  |
| 14:62693850-62693850 | downstream gene variant         | MODIFIER | Serpine3 | ENSMUSG00000091155 | Transcript | ENSMUST00000171692 | protein coding          | rs45951550  |
| 14:62693850-62693850 | intron variant                  | MODIFIER | Ints6    | ENSMUSG00000035161 | Transcript | ENSMUST00000223585 | protein coding          | rs45951550  |
| 14:63144541-63144541 | 3 prime UTR variant             | MODIFIER | Ctsb     | ENSMUSG00000021939 | Transcript | ENSMUST00000006235 | protein coding          | -           |
| 14:63144541-63144541 | downstream_gene_variant         | MODIFIER | Fdft1    | ENSMUSG00000021273 | Transcript | ENSMUST00000054963 | protein_coding          | -           |
| 14:63144541-63144541 | downstream_gene_variant         | MODIFIER | Fdft1    | ENSMUSG00000021273 | Transcript | ENSMUST00000224625 | protein_coding          | -           |
| 14:63144541-63144541 | downstream_gene_variant         | MODIFIER | Ctsb     | ENSMUSG00000021939 | Transcript | ENSMUST00000225540 | retained_intron         | -           |

|                      |                                       |          |          |                    |                   |                     |                         |             |
|----------------------|---------------------------------------|----------|----------|--------------------|-------------------|---------------------|-------------------------|-------------|
| 14:63144541-63144541 | regulatory region variant             | MODIFIER | -        | -                  | RegulatoryFeature | ENSMUSR00000562215  | open chromatin region   | -           |
| 14:63524649-63524649 | intron_variant                        | MODIFIER | Mtmr9    | ENSMUSG00000035078 | Transcript        | ENSMUST00000058679  | protein_coding          | rs31013204  |
| 14:63524649-63524649 | intron_variant                        | MODIFIER | Mtmr9    | ENSMUSG00000035078 | Transcript        | ENSMUST000000225449 | protein_coding          | rs31013204  |
| 14:65394668-65394668 | intron_variant                        | MODIFIER | Zfp395   | ENSMUSG00000034522 | Transcript        | ENSMUST00000066994  | protein_coding          | rs31105555  |
| 14:65394668-65394668 | upstream gene variant                 | MODIFIER | Zfp395   | ENSMUSG00000034522 | Transcript        | ENSMUST000000225512 | retained intron         | rs31105555  |
| 14:69243134-69243137 | 3 prime UTR variant                   | MODIFIER | Slc25a37 | ENSMUSG00000034248 | Transcript        | ENSMUST00000037064  | protein_coding          | rs217663790 |
| 14:69243134-69243137 | non coding transcript exon variant    | MODIFIER | Slc25a37 | ENSMUSG00000034248 | Transcript        | ENSMUST00000184497  | retained intron         | rs217663790 |
| 14:69243134-69243137 | downstream_gene_variant               | MODIFIER | Slc25a37 | ENSMUSG00000034248 | Transcript        | ENSMUST00000184914  | nonsense mediated decay | rs217663790 |
| 14:69697818-69697818 | downstream_gene_variant               | MODIFIER | Loxl2    | ENSMUSG00000034205 | Transcript        | ENSMUST00000022660  | protein_coding          | rs30353057  |
| 14:69697818-69697818 | downstream_gene_variant               | MODIFIER | Loxl2    | ENSMUSG00000034205 | Transcript        | ENSMUST00000100420  | protein_coding          | rs30353057  |
| 14:69697818-69697818 | intron variant                        | MODIFIER | R3hcc1   | ENSMUSG00000034194 | Transcript        | ENSMUST00000118374  | protein_coding          | rs30353057  |
| 14:69697818-69697818 | intron variant                        | MODIFIER | R3hcc1   | ENSMUSG00000034194 | Transcript        | ENSMUST00000121142  | protein_coding          | rs30353057  |
| 14:69697818-69697818 | downstream gene variant               | MODIFIER | R3hcc1   | ENSMUSG00000034194 | Transcript        | ENSMUST00000138326  | retained intron         | rs30353057  |
| 14:69697818-69697818 | intron variant                        | MODIFIER | R3hcc1   | ENSMUSG00000034194 | Transcript        | ENSMUST00000216152  | protein_coding          | rs30353057  |
| 14:7943204-7943204   | intron_variant                        | MODIFIER | Flnb     | ENSMUSG00000025278 | Transcript        | ENSMUST00000052678  | protein_coding          | rs50779522  |
| 14:7943204-7943204   | regulatory_region_variant             | MODIFIER | -        | -                  | RegulatoryFeature | ENSMUSR00000344611  | enhancer                | rs50779522  |
| 14:7944021-7944021   | intron_variant                        | MODIFIER | Flnb     | ENSMUSG00000025278 | Transcript        | ENSMUST00000052678  | protein_coding          | rs48896371  |
| 14:7944021-7944021   | regulatory region variant             | MODIFIER | -        | -                  | RegulatoryFeature | ENSMUSR00000344611  | enhancer                | rs48896371  |
| 14:7944065-7944065   | intron variant                        | MODIFIER | Flnb     | ENSMUSG00000025278 | Transcript        | ENSMUST00000052678  | protein_coding          | rs51343795  |
| 14:7944065-7944065   | regulatory region variant             | MODIFIER | -        | -                  | RegulatoryFeature | ENSMUSR00000344611  | enhancer                | rs51343795  |
| 14:7945611-7945611   | intron_variant                        | MODIFIER | Flnb     | ENSMUSG00000025278 | Transcript        | ENSMUST00000052678  | protein_coding          | rs107933386 |
| 14:7945624-7945624   | intron_variant                        | MODIFIER | Flnb     | ENSMUSG00000025278 | Transcript        | ENSMUST00000052678  | protein_coding          | rs108416006 |
| 14:8056653-8056653   | downstream_gene_variant               | MODIFIER | Abhd6    | ENSMUSG00000025277 | Transcript        | ENSMUST00000026313  | protein_coding          | rs253972729 |
| 14:8056653-8056653   | 3 prime UTR variant                   | MODIFIER | Abhd6    | ENSMUSG00000025277 | Transcript        | ENSMUST00000166497  | protein_coding          | rs253972729 |
| 14:8056653-8056653   | 3 prime UTR variant                   | MODIFIER | Abhd6    | ENSMUSG00000025277 | Transcript        | ENSMUST00000225234  | protein_coding          | rs253972729 |
| 14:8162296-8162296   | downstream gene variant               | MODIFIER | Pdhb     | ENSMUSG00000021748 | Transcript        | ENSMUST00000022268  | protein_coding          | rs50907424  |
| 14:8162296-8162296   | intron variant                        | MODIFIER | Pxx      | ENSMUSG00000033885 | Transcript        | ENSMUST00000036682  | protein_coding          | rs50907424  |
| 14:8162296-8162296   | intron_variant                        | MODIFIER | Pxx      | ENSMUSG00000033885 | Transcript        | ENSMUST00000112689  | protein_coding          | rs50907424  |
| 14:8162296-8162296   | intron_variant                        | MODIFIER | Pxx      | ENSMUSG00000033885 | Transcript        | ENSMUST00000225653  | protein_coding          | rs50907424  |
| 14:8162296-8162296   | downstream_gene_variant               | MODIFIER | Pdhb     | ENSMUSG00000021748 | Transcript        | ENSMUST00000225747  | retained_intron         | rs50907424  |
| 14:8165329-8165329   | downstream gene variant               | MODIFIER | Pdhb     | ENSMUSG00000021748 | Transcript        | ENSMUST00000022268  | protein_coding          | rs31461919  |
| 14:8165329-8165329   | downstream gene variant               | MODIFIER | Pxx      | ENSMUSG00000033885 | Transcript        | ENSMUST00000036682  | protein_coding          | rs31461919  |
| 14:8165329-8165329   | downstream gene variant               | MODIFIER | Pxx      | ENSMUSG00000033885 | Transcript        | ENSMUST00000112689  | protein_coding          | rs31461919  |
| 14:8165329-8165329   | downstream_gene_variant               | MODIFIER | Pdhb     | ENSMUSG00000021748 | Transcript        | ENSMUST00000224466  | processed_transcript    | rs31461919  |
| 14:8165329-8165329   | downstream_gene_variant               | MODIFIER | Pdhb     | ENSMUSG00000021748 | Transcript        | ENSMUST00000225274  | processed_transcript    | rs31461919  |
| 14:8165329-8165329   | downstream_gene_variant               | MODIFIER | Pxx      | ENSMUSG00000033885 | Transcript        | ENSMUST00000225653  | protein_coding          | rs31461919  |
| 14:8165329-8165329   | downstream gene variant               | MODIFIER | Pdhb     | ENSMUSG00000021748 | Transcript        | ENSMUST00000225747  | retained intron         | rs31461919  |
| 14:8214985-8214985   | intron variant                        | MODIFIER | Kctd6    | ENSMUSG00000021752 | Transcript        | ENSMUST00000022272  | protein_coding          | rs258689661 |
| 14:8214985-8214985   | 5 prime UTR variant                   | MODIFIER | Kctd6    | ENSMUSG00000021752 | Transcript        | ENSMUST00000170111  | protein_coding          | rs258689661 |
| 14:8214985-8214985   | regulatory region variant             | MODIFIER | -        | -                  | RegulatoryFeature | ENSMUSR00000082367  | promoter                | rs258689661 |
| 14:8217551-8217551   | intron_variant                        | MODIFIER | Kctd6    | ENSMUSG00000021752 | Transcript        | ENSMUST00000022272  | protein_coding          | rs236042515 |
| 14:8217551-8217551   | intron_variant                        | MODIFIER | Kctd6    | ENSMUSG00000021752 | Transcript        | ENSMUST00000170111  | protein_coding          | rs236042515 |
| 14:13957841-13957841 | intron_variant                        | MODIFIER | Thoc7    | ENSMUSG00000053453 | Transcript        | ENSMUST00000065865  | protein_coding          | rs45877323  |
| 14:13957841-13957841 | intron variant,NMD transcript variant | MODIFIER | Thoc7    | ENSMUSG00000053453 | Transcript        | ENSMUST00000223832  | nonsense mediated decay | rs45877323  |
| 14:13957841-13957841 | upstream gene variant                 | MODIFIER | Atxn7    | ENSMUSG00000021738 | Transcript        | ENSMUST00000223880  | protein_coding          | rs45877323  |
| 14:13957841-13957841 | intron variant,non coding transcript  | MODIFIER | Thoc7    | ENSMUSG00000053453 | Transcript        | ENSMUST00000224015  | processed_transcript    | rs45877323  |
| 14:13957841-13957841 | upstream_gene_variant                 | MODIFIER | Thoc7    | ENSMUSG00000053453 | Transcript        | ENSMUST00000224652  | processed_transcript    | rs45877323  |
| 14:13957841-13957841 | upstream_gene_variant                 | MODIFIER | Thoc7    | ENSMUSG00000053453 | Transcript        | ENSMUST00000224764  | retained_intron         | rs45877323  |
| 14:13957841-13957841 | intron_variant,non coding transcript  | MODIFIER | Thoc7    | ENSMUSG00000053453 | Transcript        | ENSMUST00000225202  | processed_transcript    | rs45877323  |
| 14:13957841-13957841 | intron variant,non coding transcript  | MODIFIER | Thoc7    | ENSMUSG00000053453 | Transcript        | ENSMUST00000225317  | retained intron         | rs45877323  |
| 14:13957841-13957841 | intron variant                        | MODIFIER | Thoc7    | ENSMUSG00000053453 | Transcript        | ENSMUST00000225325  | protein_coding          | rs45877323  |
| 14:13957841-13957841 | intron variant,non coding transcript  | MODIFIER | Thoc7    | ENSMUSG00000053453 | Transcript        | ENSMUST00000225325  | protein_coding          | rs45877323  |
| 14:13957841-13957841 | upstream gene variant                 | MODIFIER | Thoc7    | ENSMUSG00000053453 | Transcript        | ENSMUST00000225401  | processed_transcript    | rs45877323  |
| 14:13957841-13957841 | intron_variant,NMD_transcript_variant | MODIFIER | Thoc7    | ENSMUSG00000053453 | Transcript        | ENSMUST00000225559  | nonsense mediated decay | rs45877323  |
| 14:13957841-13957841 | intron_variant                        | MODIFIER | Thoc7    | ENSMUSG00000053453 | Transcript        | ENSMUST00000225590  | nonsense mediated decay | rs45877323  |
| 14:13957841-13957841 | intron_variant                        | MODIFIER | Thoc7    | ENSMUSG00000053453 | Transcript        | ENSMUST00000225891  | protein_coding          | rs45877323  |
| 14:13957841-13957841 | upstream_gene_variant                 | MODIFIER | Thoc7    | ENSMUSG00000053453 | Transcript        | ENSMUST00000226008  | processed_transcript    | rs45877323  |
| 14:13960372-13960372 | intron variant                        | MODIFIER | Thoc7    | ENSMUSG00000053453 | Transcript        | ENSMUST00000065865  | protein_coding          | rs49865615  |
| 14:13960372-13960372 | intron variant,NMD transcript variant | MODIFIER | Thoc7    | ENSMUSG00000053453 | Transcript        | ENSMUST00000223832  | nonsense mediated decay | rs49865615  |
| 14:13960372-13960372 | upstream gene variant                 | MODIFIER | Atxn7    | ENSMUSG00000021738 | Transcript        | ENSMUST00000223880  | protein_coding          | rs49865615  |
| 14:13960372-13960372 | intron_variant,non coding transcript  | MODIFIER | Thoc7    | ENSMUSG00000053453 | Transcript        | ENSMUST00000224015  | processed_transcript    | rs49865615  |
| 14:13960372-13960372 | upstream_gene_variant                 | MODIFIER | Thoc7    | ENSMUSG00000053453 | Transcript        | ENSMUST00000224652  | processed_transcript    | rs49865615  |
| 14:13960372-13960372 | upstream_gene_variant                 | MODIFIER | Thoc7    | ENSMUSG00000053453 | Transcript        | ENSMUST00000224764  | retained_intron         | rs49865615  |
| 14:13960372-13960372 | intron variant,non coding transcript  | MODIFIER | Thoc7    | ENSMUSG00000053453 | Transcript        | ENSMUST00000225202  | processed transcript    | rs49865615  |
| 14:13960372-13960372 | intron variant,non coding transcript  | MODIFIER | Thoc7    | ENSMUSG00000053453 | Transcript        | ENSMUST00000225317  | retained intron         | rs49865615  |
| 14:13960372-13960372 | intron variant                        | MODIFIER | Thoc7    | ENSMUSG00000053453 | Transcript        | ENSMUST00000225325  | protein_coding          | rs49865615  |
| 14:13960372-13960372 | intron variant,non coding transcript  | MODIFIER | Thoc7    | ENSMUSG00000053453 | Transcript        | ENSMUST00000225401  | processed_transcript    | rs49865615  |
| 14:13960372-13960372 | intron_variant,NMD_transcript_variant | MODIFIER | Thoc7    | ENSMUSG00000053453 | Transcript        | ENSMUST00000225590  | nonsense mediated decay | rs49865615  |
| 14:13960372-13960372 | intron_variant                        | MODIFIER | Thoc7    | ENSMUSG00000053453 | Transcript        | ENSMUST00000225891  | protein_coding          | rs49865615  |
| 14:13960372-13960372 | upstream_gene_variant                 | MODIFIER | Thoc7    | ENSMUSG00000053453 | Transcript        | ENSMUST00000226008  | processed_transcript    | rs49865615  |

|                      |                                 |          |         |                     |                   |                     |                         |             |
|----------------------|---------------------------------|----------|---------|---------------------|-------------------|---------------------|-------------------------|-------------|
| 14:13960372-13960372 | regulatory region variant       | MODIFIER | -       | -                   | RegulatoryFeature | ENSMUSR00000082855  | promoter                | rs49865615  |
| 14:14098198-14098198 | intron_variant                  | MODIFIER | Atxn7   | ENSMUSG00000021738  | Transcript        | ENSMUST00000022257  | protein_coding          | rs49473443  |
| 14:14098198-14098198 | intron_variant                  | MODIFIER | Atxn7   | ENSMUSG00000021738  | Transcript        | ENSMUST000000223714 | protein_coding          | rs49473443  |
| 14:14098198-14098198 | intron_variant                  | MODIFIER | Atxn7   | ENSMUSG00000021738  | Transcript        | ENSMUST000000223880 | protein_coding          | rs49473443  |
| 14:14098198-14098198 | intron_variant,non coding trans | MODIFIER | Atxn7   | ENSMUSG00000021738  | Transcript        | ENSMUST000000223932 | retained intron         | rs49473443  |
| 14:14098198-14098198 | intron_variant                  | MODIFIER | Atxn7   | ENSMUSG00000021738  | Transcript        | ENSMUST000000224315 | protein_coding          | rs49473443  |
| 14:14098198-14098198 | regulatory region variant       | MODIFIER | -       | -                   | RegulatoryFeature | ENSMUSR000000344937 | CTCF binding site       | rs49473443  |
| 14:16295267-16295267 | intron_variant                  | MODIFIER | Ngly1   | ENSMUSG00000021785  | Transcript        | ENSMUST00000022310  | protein_coding          | rs30833843  |
| 14:16295267-16295267 | intron_variant                  | MODIFIER | Ngly1   | ENSMUSG00000021785  | Transcript        | ENSMUST000000224656 | protein_coding          | rs30833843  |
| 14:16300908-16300908 | intron_variant                  | MODIFIER | Ngly1   | ENSMUSG00000021785  | Transcript        | ENSMUST00000022310  | protein_coding          | rs252456526 |
| 14:16300908-16300908 | upstream gene variant           | MODIFIER | Gm47798 | ENSMUSG000000114253 | Transcript        | ENSMUST000000224494 | sense intronic          | rs252456526 |
| 14:16300908-16300908 | intron variant                  | MODIFIER | Ngly1   | ENSMUSG00000021785  | Transcript        | ENSMUST000000224656 | protein_coding          | rs252456526 |
| 14:18214035-18214035 | intron variant                  | MODIFIER | Nr1d2   | ENSMUSG00000021775  | Transcript        | ENSMUST00000090543  | protein_coding          | rs30194888  |
| 14:18214035-18214035 | downstream gene variant         | MODIFIER | Nr1d2   | ENSMUSG00000021775  | Transcript        | ENSMUST00000143308  | retained intron         | rs30194888  |
| 14:18214035-18214035 | upstream_gene_variant           | MODIFIER | Nr1d2   | ENSMUSG00000021775  | Transcript        | ENSMUST000000225308 | retained_intron         | rs30194888  |
| 14:18214035-18214035 | intron_variant                  | MODIFIER | Nr1d2   | ENSMUSG00000021775  | Transcript        | ENSMUST000000225491 | protein_coding          | rs30194888  |
| 14:18283470-18283470 | downstream_gene_variant         | MODIFIER | Nkiras1 | ENSMUSG00000021772  | Transcript        | ENSMUST00000022294  | nonsense_mediated_decay | rs30927562  |
| 14:18283470-18283470 | intron variant                  | MODIFIER | Ube2e1  | ENSMUSG00000021774  | Transcript        | ENSMUST00000022296  | protein_coding          | rs30927562  |
| 14:18283470-18283470 | 3 prime UTR variant             | MODIFIER | Nkiras1 | ENSMUSG00000021772  | Transcript        | ENSMUST00000132374  | protein_coding          | rs30927562  |
| 14:18283470-18283470 | downstream gene variant         | MODIFIER | Nkiras1 | ENSMUSG00000021772  | Transcript        | ENSMUST00000133460  | protein_coding          | rs30927562  |
| 14:18283470-18283470 | downstream_gene_variant         | MODIFIER | Nkiras1 | ENSMUSG00000021772  | Transcript        | ENSMUST00000156186  | processed_transcript    | rs30927562  |
| 14:18283470-18283470 | downstream_gene_variant         | MODIFIER | Ube2e1  | ENSMUSG00000021774  | Transcript        | ENSMUST00000160266  | retained_intron         | rs30927562  |
| 14:18283470-18283470 | downstream_gene_variant         | MODIFIER | Ube2e1  | ENSMUSG00000021774  | Transcript        | ENSMUST00000162831  | processed_transcript    | rs30927562  |
| 14:18283470-18283470 | intron variant                  | MODIFIER | Ube2e1  | ENSMUSG00000021774  | Transcript        | ENSMUST00000225612  | protein_coding          | rs30927562  |
| 14:19879762-19879762 | intron variant                  | MODIFIER | Gng2    | ENSMUSG00000043004  | Transcript        | ENSMUST00000055100  | protein_coding          | rs30673412  |
| 14:19879762-19879762 | intron variant                  | MODIFIER | Gng2    | ENSMUSG00000043004  | Transcript        | ENSMUST00000159028  | protein_coding          | rs30673412  |
| 14:19879762-19879762 | intron variant                  | MODIFIER | Gng2    | ENSMUSG00000043004  | Transcript        | ENSMUST00000159073  | protein_coding          | rs30673412  |
| 14:19879762-19879762 | intron_variant                  | MODIFIER | Gng2    | ENSMUSG00000043004  | Transcript        | ENSMUST00000160013  | protein_coding          | rs30673412  |
| 14:19879762-19879762 | intron_variant                  | MODIFIER | Gng2    | ENSMUSG00000043004  | Transcript        | ENSMUST00000161247  | protein_coding          | rs30673412  |
| 14:19879762-19879762 | intron_variant                  | MODIFIER | Gng2    | ENSMUSG00000043004  | Transcript        | ENSMUST00000162425  | protein_coding          | rs30673412  |
| 14:19884101-19884101 | intron variant                  | MODIFIER | Gng2    | ENSMUSG00000043004  | Transcript        | ENSMUST00000055100  | protein_coding          | rs30688347  |
| 14:19884101-19884101 | intron variant                  | MODIFIER | Gng2    | ENSMUSG00000043004  | Transcript        | ENSMUST00000159028  | protein_coding          | rs30688347  |
| 14:19884101-19884101 | intron variant                  | MODIFIER | Gng2    | ENSMUSG00000043004  | Transcript        | ENSMUST00000159073  | protein_coding          | rs30688347  |
| 14:19884101-19884101 | intron_variant                  | MODIFIER | Gng2    | ENSMUSG00000043004  | Transcript        | ENSMUST00000160013  | protein_coding          | rs30688347  |
| 14:19884101-19884101 | intron_variant                  | MODIFIER | Gng2    | ENSMUSG00000043004  | Transcript        | ENSMUST00000161247  | protein_coding          | rs30688347  |
| 14:19884101-19884101 | intron_variant                  | MODIFIER | Gng2    | ENSMUSG00000043004  | Transcript        | ENSMUST00000162425  | protein_coding          | rs30688347  |
| 14:27000870-27000870 | missense variant                | MODERATE | Hesx1   | ENSMUSG00000040726  | Transcript        | ENSMUST00000035433  | protein_coding          | rs30787589  |
| 14:27000870-27000870 | missense variant                | MODERATE | Hesx1   | ENSMUSG00000040726  | Transcript        | ENSMUST000000224331 | protein_coding          | rs30787589  |
| 14:27000870-27000870 | regulatory region variant       | MODIFIER | -       | -                   | RegulatoryFeature | ENSMUSR000000346003 | promoter                | rs30787589  |
| 14:27001445-27001445 | synonymous variant              | LOW      | Hesx1   | ENSMUSG00000040726  | Transcript        | ENSMUST00000035433  | protein_coding          | rs30786772  |
| 14:27001445-27001445 | synonymous_variant              | LOW      | Hesx1   | ENSMUSG00000040726  | Transcript        | ENSMUST000000224331 | protein_coding          | rs30786772  |
| 14:27001511-27001511 | synonymous_variant              | LOW      | Hesx1   | ENSMUSG00000040726  | Transcript        | ENSMUST00000035433  | protein_coding          | rs30786771  |
| 14:27001511-27001511 | synonymous_variant              | LOW      | Hesx1   | ENSMUSG00000040726  | Transcript        | ENSMUST000000224331 | protein_coding          | rs30786771  |
| 14:27001896-27001896 | synonymous variant              | LOW      | Hesx1   | ENSMUSG00000040726  | Transcript        | ENSMUST00000035433  | protein_coding          | rs30786766  |
| 14:27001896-27001896 | synonymous variant              | LOW      | Hesx1   | ENSMUSG00000040726  | Transcript        | ENSMUST000000224331 | protein_coding          | rs30786766  |
| 14:27002071-27002071 | synonymous variant              | LOW      | Hesx1   | ENSMUSG00000040726  | Transcript        | ENSMUST00000035433  | protein_coding          | rs47195088  |
| 14:27002071-27002071 | synonymous_variant              | LOW      | Hesx1   | ENSMUSG00000040726  | Transcript        | ENSMUST000000224331 | protein_coding          | rs47195088  |
| 14:27002073-27002073 | missense_variant                | MODERATE | Hesx1   | ENSMUSG00000040726  | Transcript        | ENSMUST00000035433  | protein_coding          | rs49120517  |
| 14:27002073-27002073 | missense_variant                | MODERATE | Hesx1   | ENSMUSG00000040726  | Transcript        | ENSMUST000000224331 | protein_coding          | rs49120517  |
| 14:27002801-27002801 | downstream gene variant         | MODIFIER | Hesx1   | ENSMUSG00000040726  | Transcript        | ENSMUST00000035433  | protein_coding          | rs30785940  |
| 14:27002801-27002801 | downstream gene variant         | MODIFIER | Hesx1   | ENSMUSG00000040726  | Transcript        | ENSMUST000000224331 | protein_coding          | rs30785940  |
| 14:27003084-27003084 | downstream gene variant         | MODIFIER | Hesx1   | ENSMUSG00000040726  | Transcript        | ENSMUST00000035433  | protein_coding          | rs260976678 |
| 14:27003084-27003084 | downstream_gene_variant         | MODIFIER | Hesx1   | ENSMUSG00000040726  | Transcript        | ENSMUST000000224331 | protein_coding          | rs260976678 |
| 14:31366680-31366680 | intron_variant                  | MODIFIER | Capn7   | ENSMUSG00000021893  | Transcript        | ENSMUST00000022451  | protein_coding          | rs16797100  |
| 14:31366680-31366680 | intron_variant,NMD_transcript_v | MODIFIER | Sh3bp5  | ENSMUSG00000021892  | Transcript        | ENSMUST00000140002  | nonsense_mediated_decay | rs16797100  |
| 14:31366680-31366680 | intron_variant,NMD_transcript_v | MODIFIER | Capn7   | ENSMUSG00000021893  | Transcript        | ENSMUST00000143472  | nonsense_mediated_decay | rs16797100  |
| 14:31366680-31366680 | intron variant,NMD_transcript_v | MODIFIER | Capn7   | ENSMUSG00000021893  | Transcript        | ENSMUST00000152182  | nonsense_mediated_decay | rs16797100  |
| 14:31366680-31366680 | intron variant,non coding trans | MODIFIER | Capn7   | ENSMUSG00000021893  | Transcript        | ENSMUST00000228237  | retained intron         | rs16797100  |
| 14:31377107-31377107 | intron variant                  | MODIFIER | Sh3bp5  | ENSMUSG00000021892  | Transcript        | ENSMUST000000091903 | protein_coding          | rs47944161  |
| 14:31377107-31377107 | intron_variant                  | MODIFIER | Sh3bp5  | ENSMUSG00000021892  | Transcript        | ENSMUST00000100730  | protein_coding          | rs47944161  |
| 14:31377107-31377107 | intron_variant,NMD_transcript_v | MODIFIER | Sh3bp5  | ENSMUSG00000021892  | Transcript        | ENSMUST00000140002  | nonsense_mediated_decay | rs47944161  |
| 14:31377107-31377107 | downstream_gene_variant         | MODIFIER | Sh3bp5  | ENSMUSG00000021892  | Transcript        | ENSMUST00000147586  | processed_transcript    | rs47944161  |
| 15:55255684-55255684 | downstream gene variant         | MODIFIER | Deptor  | ENSMUSG00000022419  | Transcript        | ENSMUST00000023056  | protein_coding          | -           |
| 15:55255684-55255684 | 3 prime UTR variant             | MODIFIER | Deptor  | ENSMUSG00000022419  | Transcript        | ENSMUST00000096433  | protein_coding          | -           |
| 15:85371021-85371021 | intron variant                  | MODIFIER | Atxn10  | ENSMUSG00000016541  | Transcript        | ENSMUST00000163242  | protein_coding          | rs580772718 |
| 15:95941990-95941990 | intron variant                  | MODIFIER | Ano6    | ENSMUSG00000064210  | Transcript        | ENSMUST00000071874  | protein_coding          | rs32217448  |
| 15:95941990-95941990 | intron_variant,non_coding_trans | MODIFIER | Ano6    | ENSMUSG00000064210  | Transcript        | ENSMUST000000226761 | retained_intron         | rs32217448  |
| 15:95941990-95941990 | intron_variant,NMD_transcript_v | MODIFIER | Ano6    | ENSMUSG00000064210  | Transcript        | ENSMUST00000227151  | nonsense_mediated_decay | rs32217448  |
| 15:95941990-95941990 | intron_variant                  | MODIFIER | Ano6    | ENSMUSG00000064210  | Transcript        | ENSMUST00000227791  | protein_coding          | rs32217448  |



|                      |                                 |          |         |                    |                   |                     |                          |             |
|----------------------|---------------------------------|----------|---------|--------------------|-------------------|---------------------|--------------------------|-------------|
| 15:96584229-96584229 | intron variant                  | MODIFIER | Slc38a1 | ENSMUSG00000023169 | Transcript        | ENSMUST00000088452  | protein coding           | rs50190857  |
| 15:96584229-96584229 | intron_variant                  | MODIFIER | Slc38a1 | ENSMUSG00000023169 | Transcript        | ENSMUST00000088454  | protein_coding           | rs50190857  |
| 15:96584229-96584229 | intron_variant                  | MODIFIER | Slc38a1 | ENSMUSG00000023169 | Transcript        | ENSMUST00000100262  | protein_coding           | rs50190857  |
| 15:96584229-96584229 | upstream_gene_variant           | MODIFIER | Slc38a1 | ENSMUSG00000023169 | Transcript        | ENSMUST00000230607  | retained_intron          | rs50190857  |
| 15:96584229-96584229 | non coding transcript exon var  | MODIFIER | Slc38a1 | ENSMUSG00000023169 | Transcript        | ENSMUST00000230756  | retained_intron          | rs50190857  |
| 15:96589941-96589941 | intron variant                  | MODIFIER | Slc38a1 | ENSMUSG00000023169 | Transcript        | ENSMUST00000088452  | protein coding           | rs49027448  |
| 15:96589941-96589941 | intron variant                  | MODIFIER | Slc38a1 | ENSMUSG00000023169 | Transcript        | ENSMUST00000088454  | protein coding           | rs49027448  |
| 15:96589941-96589941 | intron_variant                  | MODIFIER | Slc38a1 | ENSMUSG00000023169 | Transcript        | ENSMUST00000100262  | protein_coding           | rs49027448  |
| 15:96589941-96589941 | intron_variant,non_coding_trans | MODIFIER | Slc38a1 | ENSMUSG00000023169 | Transcript        | ENSMUST00000230756  | retained_intron          | rs49027448  |
| 15:96638321-96638321 | intron_variant                  | MODIFIER | Slc38a1 | ENSMUSG00000023169 | Transcript        | ENSMUST00000088452  | protein coding           | rs31878648  |
| 15:96638321-96638321 | intron variant                  | MODIFIER | Slc38a1 | ENSMUSG00000023169 | Transcript        | ENSMUST00000088454  | protein coding           | rs31878648  |
| 15:96638321-96638321 | intron variant                  | MODIFIER | Slc38a1 | ENSMUSG00000023169 | Transcript        | ENSMUST00000100262  | protein coding           | rs31878648  |
| 15:96638321-96638321 | downstream gene variant         | MODIFIER | Slc38a1 | ENSMUSG00000023169 | Transcript        | ENSMUST00000229253  | retained_intron          | rs31878648  |
| 15:96638321-96638321 | intron variant,non coding_trans | MODIFIER | Slc38a1 | ENSMUSG00000023169 | Transcript        | ENSMUST00000230756  | retained_intron          | rs31878648  |
| 15:96638321-96638321 | intron_variant                  | MODIFIER | Slc38a1 | ENSMUSG00000023169 | Transcript        | ENSMUST00000230767  | protein_coding           | rs31878648  |
| 15:96643369-96643369 | upstream_gene_variant           | MODIFIER | Slc38a1 | ENSMUSG00000023169 | Transcript        | ENSMUST00000088452  | protein_coding           | rs107608993 |
| 15:96643369-96643369 | upstream_gene_variant           | MODIFIER | Slc38a1 | ENSMUSG00000023169 | Transcript        | ENSMUST00000088454  | protein_coding           | rs107608993 |
| 15:96643369-96643369 | upstream gene variant           | MODIFIER | Slc38a1 | ENSMUSG00000023169 | Transcript        | ENSMUST00000100262  | protein coding           | rs107608993 |
| 15:96643369-96643369 | upstream gene variant           | MODIFIER | Slc38a1 | ENSMUSG00000023169 | Transcript        | ENSMUST00000229253  | retained_intron          | rs107608993 |
| 15:96643369-96643369 | upstream gene variant           | MODIFIER | Slc38a1 | ENSMUSG00000023169 | Transcript        | ENSMUST00000230756  | retained_intron          | rs107608993 |
| 15:96643369-96643369 | upstream_gene_variant           | MODIFIER | Slc38a1 | ENSMUSG00000023169 | Transcript        | ENSMUST00000230767  | protein_coding           | rs107608993 |
| 15:96643369-96643369 | regulatory_region_variant       | MODIFIER | -       | -                  | RegulatoryFeature | ENSMUSFR00000358205 | promoter                 | rs107608993 |
| 15:96694872-96694872 | intron_variant                  | MODIFIER | Slc38a2 | ENSMUSG00000022462 | Transcript        | ENSMUST00000023099  | protein coding           | rs32371387  |
| 15:96694872-96694872 | non coding transcript exon var  | MODIFIER | Slc38a2 | ENSMUSG00000022462 | Transcript        | ENSMUST00000229141  | retained_intron          | rs32371387  |
| 15:97801560-97801560 | intron variant                  | MODIFIER | Hdac7   | ENSMUSG00000022475 | Transcript        | ENSMUST00000079838  | protein coding           | rs32034330  |
| 15:97801560-97801560 | intron variant                  | MODIFIER | Hdac7   | ENSMUSG00000022475 | Transcript        | ENSMUST00000088402  | protein coding           | rs32034330  |
| 15:97801560-97801560 | intron variant                  | MODIFIER | Hdac7   | ENSMUSG00000022475 | Transcript        | ENSMUST00000116408  | protein coding           | rs32034330  |
| 15:97801560-97801560 | intron_variant                  | MODIFIER | Hdac7   | ENSMUSG00000022475 | Transcript        | ENSMUST00000116409  | protein_coding           | rs32034330  |
| 15:97801560-97801560 | intron_variant                  | MODIFIER | Hdac7   | ENSMUSG00000022475 | Transcript        | ENSMUST00000118294  | protein_coding           | rs32034330  |
| 15:97801560-97801560 | intron_variant                  | MODIFIER | Hdac7   | ENSMUSG00000022475 | Transcript        | ENSMUST00000119670  | protein_coding           | rs32034330  |
| 15:97801560-97801560 | intron variant                  | MODIFIER | Hdac7   | ENSMUSG00000022475 | Transcript        | ENSMUST00000120683  | protein coding           | rs32034330  |
| 15:97801560-97801560 | intron variant                  | MODIFIER | Hdac7   | ENSMUSG00000022475 | Transcript        | ENSMUST00000121514  | protein coding           | rs32034330  |
| 15:97801560-97801560 | intron variant                  | MODIFIER | Hdac7   | ENSMUSG00000022475 | Transcript        | ENSMUST00000134258  | protein coding           | rs32034330  |
| 15:97801560-97801560 | intron_variant                  | MODIFIER | Hdac7   | ENSMUSG00000022475 | Transcript        | ENSMUST00000135651  | protein_coding           | rs32034330  |
| 15:97801560-97801560 | intron_variant,NMD_transcript_v | MODIFIER | Hdac7   | ENSMUSG00000022475 | Transcript        | ENSMUST00000156045  | nonsense_mediated_decay  | rs32034330  |
| 15:97801560-97801560 | non_coding_transcript_exon_var  | MODIFIER | Hdac7   | ENSMUSG00000022475 | Transcript        | ENSMUST00000228466  | retained_intron          | rs32034330  |
| 15:97854782-97854782 | 3 prime UTR variant             | MODIFIER | Vdr     | ENSMUSG00000022479 | Transcript        | ENSMUST00000023119  | protein coding           | rs16805377  |
| 15:97854782-97854782 | downstream gene variant         | MODIFIER | Vdr     | ENSMUSG00000022479 | Transcript        | ENSMUST00000139656  | retained_intron          | rs16805377  |
| 15:97856825-97856825 | 3 prime UTR variant             | MODIFIER | Vdr     | ENSMUSG00000022479 | Transcript        | ENSMUST00000023119  | protein coding           | rs13473169  |
| 15:97856825-97856825 | downstream gene variant         | MODIFIER | Vdr     | ENSMUSG00000022479 | Transcript        | ENSMUST00000139656  | retained_intron          | rs13473169  |
| 15:97856826-97856826 | 3_prime_UTR_variant             | MODIFIER | Vdr     | ENSMUSG00000022479 | Transcript        | ENSMUST00000023119  | protein_coding           | rs16805410  |
| 15:97856826-97856826 | downstream_gene_variant         | MODIFIER | Vdr     | ENSMUSG00000022479 | Transcript        | ENSMUST00000139656  | retained_intron          | rs16805410  |
| 15:98136655-98136655 | downstream_gene_variant         | MODIFIER | Pfkm    | ENSMUSG00000033065 | Transcript        | ENSMUST00000051226  | protein coding           | rs31893433  |
| 15:98136655-98136655 | intron variant                  | MODIFIER | Asb8    | ENSMUSG00000048175 | Transcript        | ENSMUST00000059112  | protein coding           | rs31893433  |
| 15:98136655-98136655 | intron variant                  | MODIFIER | Asb8    | ENSMUSG00000048175 | Transcript        | ENSMUST00000123626  | protein coding           | rs31893433  |
| 15:98136655-98136655 | intron variant                  | MODIFIER | Asb8    | ENSMUSG00000048175 | Transcript        | ENSMUST00000123922  | protein coding           | rs31893433  |
| 15:98136655-98136655 | intron_variant                  | MODIFIER | Asb8    | ENSMUSG00000048175 | Transcript        | ENSMUST00000143400  | protein_coding           | rs31893433  |
| 15:98136655-98136655 | downstream_gene_variant         | MODIFIER | Pfkm    | ENSMUSG00000033065 | Transcript        | ENSMUST00000163507  | protein_coding           | rs31893433  |
| 15:98136655-98136655 | downstream_gene_variant         | MODIFIER | Pfkm    | ENSMUSG00000033065 | Transcript        | ENSMUST00000230445  | protein_coding           | rs31893433  |
| 15:99405992-99405992 | intron variant                  | MODIFIER | Tmbim6  | ENSMUSG00000023010 | Transcript        | ENSMUST00000023749  | protein coding           | rs51545327  |
| 15:99405992-99405992 | intron variant                  | MODIFIER | Tmbim6  | ENSMUSG00000023010 | Transcript        | ENSMUST00000159209  | protein coding           | rs51545327  |
| 15:99405992-99405992 | intron variant                  | MODIFIER | Tmbim6  | ENSMUSG00000023010 | Transcript        | ENSMUST00000159531  | protein coding           | rs51545327  |
| 15:99405992-99405992 | non coding transcript exon var  | MODIFIER | Tmbim6  | ENSMUSG00000023010 | Transcript        | ENSMUST00000160454  | retained_intron          | rs51545327  |
| 15:99405992-99405992 | intron_variant                  | MODIFIER | Tmbim6  | ENSMUSG00000023010 | Transcript        | ENSMUST00000160635  | protein_coding           | rs51545327  |
| 15:99405992-99405992 | intron_variant                  | MODIFIER | Tmbim6  | ENSMUSG00000023010 | Transcript        | ENSMUST00000161250  | protein_coding           | rs51545327  |
| 15:99405992-99405992 | intron_variant                  | MODIFIER | Tmbim6  | ENSMUSG00000023010 | Transcript        | ENSMUST00000161778  | protein_coding           | rs51545327  |
| 15:99405992-99405992 | downstream gene variant         | MODIFIER | Tmbim6  | ENSMUSG00000023010 | Transcript        | ENSMUST00000162274  | protein coding           | rs51545327  |
| 15:99405992-99405992 | intron variant                  | MODIFIER | Tmbim6  | ENSMUSG00000023010 | Transcript        | ENSMUST00000162624  | protein coding           | rs51545327  |
| 15:99405992-99405992 | intron variant                  | MODIFIER | Tmbim6  | ENSMUSG00000023010 | Transcript        | ENSMUST00000229392  | protein coding           | rs51545327  |
| 15:99405992-99405992 | intron_variant,non_coding_trans | MODIFIER | Tmbim6  | ENSMUSG00000023010 | Transcript        | ENSMUST00000231147  | retained_intron          | rs51545327  |
| 15:99405992-99405992 | upstream_gene_variant           | MODIFIER | Tmbim6  | ENSMUSG00000023010 | Transcript        | ENSMUST00000231173  | protein_coding           | rs51545327  |
| 15:99422483-99422483 | 3_prime_UTR_variant             | MODIFIER | Nckap5l | ENSMUSG00000023009 | Transcript        | ENSMUST00000023747  | protein_coding           | rs225319147 |
| 15:99422483-99422483 | downstream gene variant         | MODIFIER | Nckap5l | ENSMUSG00000023009 | Transcript        | ENSMUST00000160500  | processed transcript     | rs225319147 |
| 15:99422483-99422483 | downstream gene variant         | MODIFIER | Nckap5l | ENSMUSG00000023009 | Transcript        | ENSMUST00000161004  | protein coding           | rs225319147 |
| 15:99422483-99422483 | regulatory region variant       | MODIFIER | -       | -                  | RegulatoryFeature | ENSMUSFR00000105865 | promoter flanking region | rs225319147 |
| 15:99425633-99425633 | synonymous variant              | LOW      | Nckap5l | ENSMUSG00000023009 | Transcript        | ENSMUST00000023747  | protein coding           | rs13482737  |
| 15:99425633-99425633 | upstream_gene_variant           | MODIFIER | Nckap5l | ENSMUSG00000089968 | Transcript        | ENSMUST00000159738  | antisense                | rs13482737  |
| 15:99425633-99425633 | upstream_gene_variant           | MODIFIER | Nckap5l | ENSMUSG00000023009 | Transcript        | ENSMUST00000160500  | processed transcript     | rs13482737  |
| 15:99425633-99425633 | upstream_gene_variant           | MODIFIER | Nckap5l | ENSMUSG00000023009 | Transcript        | ENSMUST00000161004  | protein_coding           | rs13482737  |

|                      |                                    |          |               |                    |                   |                     |                          |             |
|----------------------|------------------------------------|----------|---------------|--------------------|-------------------|---------------------|--------------------------|-------------|
| 15:99425633-99425633 | downstream gene variant            | MODIFIER | Nckap5l       | ENSMUSG00000023009 | Transcript        | ENSMUST00000161948  | protein coding           | rs13482737  |
| 15:99425633-99425633 | synonymous_variant                 | LOW      | Nckap5l       | ENSMUSG00000023009 | Transcript        | ENSMUST00000023747  | protein_coding           | rs32022082  |
| 15:99425633-99425633 | upstream_gene_variant              | MODIFIER | Nckap5los     | ENSMUSG00000089968 | Transcript        | ENSMUST00000159738  | antisense                | rs32022082  |
| 15:99425633-99425633 | upstream_gene_variant              | MODIFIER | Nckap5l       | ENSMUSG00000023009 | Transcript        | ENSMUST00000160500  | processed_transcript     | rs32022082  |
| 15:99425633-99425633 | upstream_gene_variant              | MODIFIER | Nckap5l       | ENSMUSG00000023009 | Transcript        | ENSMUST00000161004  | protein coding           | rs32022082  |
| 15:99425633-99425633 | downstream gene variant            | MODIFIER | Nckap5l       | ENSMUSG00000023009 | Transcript        | ENSMUST00000161948  | protein coding           | rs32022082  |
| 16:11203472-11203472 | upstream_gene_variant              | MODIFIER | Rsl1d1        | ENSMUSG00000005846 | Transcript        | ENSMUST00000119953  | protein coding           | -           |
| 16:11203472-11203472 | upstream_gene_variant              | MODIFIER | Rsl1d1        | ENSMUSG00000005846 | Transcript        | ENSMUST00000124454  | retained_intron          | -           |
| 16:11203472-11203472 | non_coding_transcript_exon_variant | MODIFIER | 2610020C07Rik | ENSMUSG00000097537 | Transcript        | ENSMUST00000181526  | antisense                | -           |
| 16:11203472-11203472 | upstream_gene_variant              | MODIFIER | 2610020C07Rik | ENSMUSG00000097537 | Transcript        | ENSMUST00000229756  | antisense                | -           |
| 16:11203472-11203472 | upstream_gene_variant              | MODIFIER | Rsl1d1        | ENSMUSG00000005846 | Transcript        | ENSMUST00000230002  | protein coding           | -           |
| 16:11203472-11203472 | upstream_gene_variant              | MODIFIER | 2610020C07Rik | ENSMUSG00000097537 | Transcript        | ENSMUST00000230166  | antisense                | -           |
| 16:11203472-11203472 | upstream_gene_variant              | MODIFIER | 2610020C07Rik | ENSMUSG00000005846 | Transcript        | ENSMUST00000230232  | nonsense mediated decay  | -           |
| 16:11203472-11203472 | upstream_gene_variant              | MODIFIER | 2610020C07Rik | ENSMUSG00000097537 | Transcript        | ENSMUST00000230245  | antisense                | -           |
| 16:11203472-11203472 | regulatory_region_variant          | MODIFIER | -             | -                  | RegulatoryFeature | ENSMUSR00000107727  | promoter                 | -           |
| 16:55865709-55865709 | intron_variant                     | MODIFIER | Nxpe3         | ENSMUSG00000075033 | Transcript        | ENSMUST00000099705  | protein_coding           | rs107935613 |
| 16:64762269-64762269 | 3_prime_UTR_variant                | MODIFIER | 4930453N24Rik | ENSMUSG00000059920 | Transcript        | ENSMUST00000076991  | protein_coding           | -           |
| 16:64762269-64762269 | intron_variant,non coding trans    | MODIFIER | 4930453N24Rik | ENSMUSG00000059920 | Transcript        | ENSMUST00000162732  | processed_transcript     | -           |
| 16:75601406-75601406 | intron_variant                     | MODIFIER | Rbm11         | ENSMUSG00000032940 | Transcript        | ENSMUST00000046378  | protein coding           | -           |
| 16:75601406-75601406 | 3_prime_UTR_variant                | MODIFIER | Rbm11         | ENSMUSG00000032940 | Transcript        | ENSMUST00000114249  | protein coding           | -           |
| 16:75601406-75601406 | 3_prime_UTR_variant                | MODIFIER | Rbm11         | ENSMUSG00000032940 | Transcript        | ENSMUST00000114253  | protein_coding           | -           |
| 16:97463249-97463249 | upstream_gene_variant              | MODIFIER | Mx1           | ENSMUSG00000000386 | Transcript        | ENSMUST00000023655  | protein_coding           | rs47985692  |
| 16:97463249-97463249 | upstream_gene_variant              | MODIFIER | Mx1           | ENSMUSG00000000386 | Transcript        | ENSMUST00000113768  | protein_coding           | rs47985692  |
| 16:97463249-97463249 | upstream_gene_variant              | MODIFIER | Mx1           | ENSMUSG00000000386 | Transcript        | ENSMUST00000135184  | nonsense mediated decay  | rs47985692  |
| 16:97463249-97463249 | upstream_gene_variant              | MODIFIER | Mx1           | ENSMUSG00000000386 | Transcript        | ENSMUST00000142883  | protein coding           | rs47985692  |
| 16:97463249-97463249 | upstream_gene_variant              | MODIFIER | Mx1           | ENSMUSG00000000386 | Transcript        | ENSMUST00000155233  | nonsense mediated decay  | rs47985692  |
| 16:97463249-97463249 | downstream gene variant            | MODIFIER | AC164088.2    | ENSMUSG00000116929 | Transcript        | ENSMUST00000231393  | TEC                      | rs47985692  |
| 16:97463249-97463249 | upstream_gene_variant              | MODIFIER | Mx1           | ENSMUSG00000000386 | Transcript        | ENSMUST00000231455  | retained_intron          | rs47985692  |
| 16:97463249-97463249 | upstream_gene_variant              | MODIFIER | Mx1           | ENSMUSG00000000386 | Transcript        | ENSMUST00000231461  | processed_transcript     | rs47985692  |
| 16:97463249-97463249 | upstream_gene_variant              | MODIFIER | Mx1           | ENSMUSG00000000386 | Transcript        | ENSMUST00000232193  | protein_coding           | rs47985692  |
| 16:97463249-97463249 | upstream_gene_variant              | MODIFIER | Mx1           | ENSMUSG00000000386 | Transcript        | ENSMUST00000232282  | nonsense mediated decay  | rs47985692  |
| 17:14099574-14099574 | regulatory_region_variant          | MODIFIER | -             | -                  | RegulatoryFeature | ENSMUSR00000591644  | promoter flanking region | -           |
| 17:14099574-14099574 | intergenic variant                 | MODIFIER | -             | -                  | -                 | -                   | -                        | -           |
| 17:31433176-31433176 | intron_variant                     | MODIFIER | Pde9a         | ENSMUSG00000004119 | Transcript        | ENSMUST000000047168 | protein_coding           | rs108457086 |
| 17:31433176-31433176 | intron_variant,NMD_transcript_v    | MODIFIER | Pde9a         | ENSMUSG00000004119 | Transcript        | ENSMUST00000124902  | nonsense mediated decay  | rs108457086 |
| 17:31433176-31433176 | intron_variant                     | MODIFIER | Pde9a         | ENSMUSG00000004119 | Transcript        | ENSMUST00000127929  | protein_coding           | rs108457086 |
| 17:31433176-31433176 | intron variant,NMD transcript v    | MODIFIER | Pde9a         | ENSMUSG00000004119 | Transcript        | ENSMUST00000131417  | nonsense mediated decay  | rs108457086 |
| 17:31433176-31433176 | intron variant                     | MODIFIER | Pde9a         | ENSMUSG00000004119 | Transcript        | ENSMUST00000134525  | protein coding           | rs108457086 |
| 17:31433176-31433176 | 5 prime UTR variant                | MODIFIER | Pde9a         | ENSMUSG00000004119 | Transcript        | ENSMUST00000136384  | protein coding           | rs108457086 |
| 17:31433176-31433176 | intron variant,NMD transcript v    | MODIFIER | Pde9a         | ENSMUSG00000004119 | Transcript        | ENSMUST00000137927  | nonsense mediated decay  | rs108457086 |
| 17:31433176-31433176 | intron_variant,NMD_transcript_v    | MODIFIER | Pde9a         | ENSMUSG00000004119 | Transcript        | ENSMUST00000141314  | nonsense mediated decay  | rs108457086 |
| 17:31433176-31433176 | intron_variant,NMD_transcript_v    | MODIFIER | Pde9a         | ENSMUSG00000004119 | Transcript        | ENSMUST00000143549  | nonsense mediated decay  | rs108457086 |
| 17:31433176-31433176 | intron_variant,non_coding_trans    | MODIFIER | Pde9a         | ENSMUSG00000004119 | Transcript        | ENSMUST00000154567  | retained_intron          | rs108457086 |
| 17:31433176-31433176 | regulatory_region_variant          | MODIFIER | -             | -                  | RegulatoryFeature | ENSMUSR00000121934  | promoter                 | rs108457086 |
| 17:31467198-31467198 | intron variant                     | MODIFIER | Pde9a         | ENSMUSG00000004119 | Transcript        | ENSMUST000000047168 | protein coding           | rs29520998  |
| 17:31467198-31467198 | intron variant,NMD transcript v    | MODIFIER | Pde9a         | ENSMUSG00000004119 | Transcript        | ENSMUST00000124902  | nonsense mediated decay  | rs29520998  |
| 17:31467198-31467198 | intron_variant                     | MODIFIER | Pde9a         | ENSMUSG00000004119 | Transcript        | ENSMUST00000127929  | protein_coding           | rs29520998  |
| 17:31467198-31467198 | intron_variant,NMD_transcript_v    | MODIFIER | Pde9a         | ENSMUSG00000004119 | Transcript        | ENSMUST00000131417  | nonsense mediated decay  | rs29520998  |
| 17:31467198-31467198 | intron_variant                     | MODIFIER | Pde9a         | ENSMUSG00000004119 | Transcript        | ENSMUST00000134525  | protein_coding           | rs29520998  |
| 17:31467198-31467198 | intron variant,NMD transcript v    | MODIFIER | Pde9a         | ENSMUSG00000004119 | Transcript        | ENSMUST00000137927  | nonsense mediated decay  | rs29520998  |
| 17:31467198-31467198 | intron variant,NMD transcript v    | MODIFIER | Pde9a         | ENSMUSG00000004119 | Transcript        | ENSMUST00000143549  | nonsense mediated decay  | rs29520998  |
| 17:31467198-31467198 | intron variant                     | MODIFIER | Pde9a         | ENSMUSG00000004119 | Transcript        | ENSMUST00000154392  | protein coding           | rs29520998  |
| 17:31467198-31467198 | intron variant,non coding trans    | MODIFIER | Pde9a         | ENSMUSG00000004119 | Transcript        | ENSMUST00000154567  | retained_intron          | rs29520998  |
| 17:31467198-31467198 | upstream_gene_variant              | MODIFIER | Pde9a         | ENSMUSG00000004119 | Transcript        | ENSMUST00000155113  | processed_transcript     | rs29520998  |
| 17:31467198-31467198 | regulatory_region_variant          | MODIFIER | -             | -                  | RegulatoryFeature | ENSMUSR00000368660  | CTCF_binding_site        | rs29520998  |
| 17:31467564-31467564 | intron_variant                     | MODIFIER | Pde9a         | ENSMUSG00000004119 | Transcript        | ENSMUST000000047168 | protein_coding           | rs33679962  |
| 17:31467564-31467564 | intron variant,NMD transcript v    | MODIFIER | Pde9a         | ENSMUSG00000004119 | Transcript        | ENSMUST00000124902  | nonsense mediated decay  | rs33679962  |
| 17:31467564-31467564 | intron variant                     | MODIFIER | Pde9a         | ENSMUSG00000004119 | Transcript        | ENSMUST00000127929  | protein_coding           | rs33679962  |
| 17:31467564-31467564 | intron variant,NMD transcript v    | MODIFIER | Pde9a         | ENSMUSG00000004119 | Transcript        | ENSMUST00000131417  | nonsense mediated decay  | rs33679962  |
| 17:31467564-31467564 | intron_variant                     | MODIFIER | Pde9a         | ENSMUSG00000004119 | Transcript        | ENSMUST00000134525  | protein_coding           | rs33679962  |
| 17:31467564-31467564 | intron_variant,NMD_transcript_v    | MODIFIER | Pde9a         | ENSMUSG00000004119 | Transcript        | ENSMUST00000137927  | nonsense mediated decay  | rs33679962  |
| 17:31467564-31467564 | intron_variant,NMD_transcript_v    | MODIFIER | Pde9a         | ENSMUSG00000004119 | Transcript        | ENSMUST00000143549  | nonsense mediated decay  | rs33679962  |
| 17:31467564-31467564 | intron variant                     | MODIFIER | Pde9a         | ENSMUSG00000004119 | Transcript        | ENSMUST00000154392  | protein coding           | rs33679962  |
| 17:31467564-31467564 | intron variant,non coding trans    | MODIFIER | Pde9a         | ENSMUSG00000004119 | Transcript        | ENSMUST00000154567  | retained_intron          | rs33679962  |
| 17:31467564-31467564 | upstream gene variant              | MODIFIER | Pde9a         | ENSMUSG00000004119 | Transcript        | ENSMUST00000155113  | processed_transcript     | rs33679962  |
| 17:31469366-31469366 | intron variant                     | MODIFIER | Pde9a         | ENSMUSG00000004119 | Transcript        | ENSMUST000000047168 | protein_coding           | rs51138857  |
| 17:31469366-31469366 | intron_variant,NMD_transcript_v    | MODIFIER | Pde9a         | ENSMUSG00000004119 | Transcript        | ENSMUST00000124902  | nonsense mediated decay  | rs51138857  |
| 17:31469366-31469366 | intron_variant                     | MODIFIER | Pde9a         | ENSMUSG00000004119 | Transcript        | ENSMUST00000127929  | protein_coding           | rs51138857  |
| 17:31469366-31469366 | intron_variant,NMD_transcript_v    | MODIFIER | Pde9a         | ENSMUSG00000004119 | Transcript        | ENSMUST00000131417  | nonsense mediated decay  | rs51138857  |

|                      |                                 |          |            |                    |                   |                    |                          |             |
|----------------------|---------------------------------|----------|------------|--------------------|-------------------|--------------------|--------------------------|-------------|
| 17:31469366-31469366 | intron variant                  | MODIFIER | Pde9a      | ENSMUSG00000041119 | Transcript        | ENSMUST00000134525 | protein coding           | rs51138857  |
| 17:31469366-31469366 | intron_variant,NMD_transcript_v | MODIFIER | Pde9a      | ENSMUSG00000041119 | Transcript        | ENSMUST00000137927 | nonsense_mediated_decay  | rs51138857  |
| 17:31469366-31469366 | intron_variant,NMD_transcript_v | MODIFIER | Pde9a      | ENSMUSG00000041119 | Transcript        | ENSMUST00000143549 | nonsense_mediated_decay  | rs51138857  |
| 17:31469366-31469366 | intron variant                  | MODIFIER | Pde9a      | ENSMUSG00000041119 | Transcript        | ENSMUST00000154392 | protein coding           | rs51138857  |
| 17:31469366-31469366 | intron variant,non coding trans | MODIFIER | Pde9a      | ENSMUSG00000041119 | Transcript        | ENSMUST00000154567 | retained intron          | rs51138857  |
| 17:31469366-31469366 | upstream gene variant           | MODIFIER | Pde9a      | ENSMUSG00000041119 | Transcript        | ENSMUST00000155113 | processed transcript     | rs51138857  |
| 17:31469381-31469381 | intron variant                  | MODIFIER | Pde9a      | ENSMUSG00000041119 | Transcript        | ENSMUST00000047168 | protein coding           | rs33130940  |
| 17:31469381-31469381 | intron_variant,NMD_transcript_v | MODIFIER | Pde9a      | ENSMUSG00000041119 | Transcript        | ENSMUST00000124902 | nonsense_mediated_decay  | rs33130940  |
| 17:31469381-31469381 | intron_variant                  | MODIFIER | Pde9a      | ENSMUSG00000041119 | Transcript        | ENSMUST00000127929 | protein coding           | rs33130940  |
| 17:31469381-31469381 | intron_variant,NMD_transcript_v | MODIFIER | Pde9a      | ENSMUSG00000041119 | Transcript        | ENSMUST00000131417 | nonsense_mediated_decay  | rs33130940  |
| 17:31469381-31469381 | intron variant                  | MODIFIER | Pde9a      | ENSMUSG00000041119 | Transcript        | ENSMUST00000134525 | protein coding           | rs33130940  |
| 17:31469381-31469381 | intron variant,NMD transcript v | MODIFIER | Pde9a      | ENSMUSG00000041119 | Transcript        | ENSMUST00000137927 | nonsense mediated decay  | rs33130940  |
| 17:31469381-31469381 | intron variant,NMD transcript v | MODIFIER | Pde9a      | ENSMUSG00000041119 | Transcript        | ENSMUST00000143549 | nonsense mediated decay  | rs33130940  |
| 17:31469381-31469381 | intron variant                  | MODIFIER | Pde9a      | ENSMUSG00000041119 | Transcript        | ENSMUST00000154392 | protein coding           | rs33130940  |
| 17:31469381-31469381 | intron_variant,non_coding_trans | MODIFIER | Pde9a      | ENSMUSG00000041119 | Transcript        | ENSMUST00000154567 | retained_intron          | rs33130940  |
| 17:31469381-31469381 | upstream_gene_variant           | MODIFIER | Pde9a      | ENSMUSG00000041119 | Transcript        | ENSMUST00000155113 | processed_transcript     | rs33130940  |
| 17:31469437-31469437 | intron variant                  | MODIFIER | Pde9a      | ENSMUSG00000041119 | Transcript        | ENSMUST00000047168 | protein coding           | rs50117613  |
| 17:31469437-31469437 | intron variant,NMD transcript v | MODIFIER | Pde9a      | ENSMUSG00000041119 | Transcript        | ENSMUST00000124902 | nonsense mediated decay  | rs50117613  |
| 17:31469437-31469437 | intron variant                  | MODIFIER | Pde9a      | ENSMUSG00000041119 | Transcript        | ENSMUST00000127929 | protein coding           | rs50117613  |
| 17:31469437-31469437 | intron variant,NMD transcript v | MODIFIER | Pde9a      | ENSMUSG00000041119 | Transcript        | ENSMUST00000131417 | nonsense mediated decay  | rs50117613  |
| 17:31469437-31469437 | intron variant                  | MODIFIER | Pde9a      | ENSMUSG00000041119 | Transcript        | ENSMUST00000134525 | protein coding           | rs50117613  |
| 17:31469437-31469437 | intron_variant,NMD_transcript_v | MODIFIER | Pde9a      | ENSMUSG00000041119 | Transcript        | ENSMUST00000137927 | nonsense_mediated_decay  | rs50117613  |
| 17:31469437-31469437 | intron_variant,NMD_transcript_v | MODIFIER | Pde9a      | ENSMUSG00000041119 | Transcript        | ENSMUST00000143549 | nonsense_mediated_decay  | rs50117613  |
| 17:31469437-31469437 | intron variant                  | MODIFIER | Pde9a      | ENSMUSG00000041119 | Transcript        | ENSMUST00000154392 | protein coding           | rs50117613  |
| 17:31469437-31469437 | intron variant,non coding trans | MODIFIER | Pde9a      | ENSMUSG00000041119 | Transcript        | ENSMUST00000154567 | retained intron          | rs50117613  |
| 17:31469437-31469437 | upstream gene variant           | MODIFIER | Pde9a      | ENSMUSG00000041119 | Transcript        | ENSMUST00000155113 | processed transcript     | rs50117613  |
| 17:31469755-31469755 | intron variant                  | MODIFIER | Pde9a      | ENSMUSG00000041119 | Transcript        | ENSMUST00000047168 | protein coding           | rs46553420  |
| 17:31469755-31469755 | intron_variant,NMD_transcript_v | MODIFIER | Pde9a      | ENSMUSG00000041119 | Transcript        | ENSMUST00000124902 | nonsense_mediated_decay  | rs46553420  |
| 17:31469755-31469755 | intron variant                  | MODIFIER | Pde9a      | ENSMUSG00000041119 | Transcript        | ENSMUST00000127929 | protein coding           | rs46553420  |
| 17:31469755-31469755 | intron_variant,NMD_transcript_v | MODIFIER | Pde9a      | ENSMUSG00000041119 | Transcript        | ENSMUST00000131417 | nonsense_mediated_decay  | rs46553420  |
| 17:31469755-31469755 | intron variant                  | MODIFIER | Pde9a      | ENSMUSG00000041119 | Transcript        | ENSMUST00000134525 | protein coding           | rs46553420  |
| 17:31469755-31469755 | intron variant,NMD transcript v | MODIFIER | Pde9a      | ENSMUSG00000041119 | Transcript        | ENSMUST00000137927 | nonsense mediated decay  | rs46553420  |
| 17:31469755-31469755 | intron variant,NMD transcript v | MODIFIER | Pde9a      | ENSMUSG00000041119 | Transcript        | ENSMUST00000143549 | nonsense mediated decay  | rs46553420  |
| 17:31469755-31469755 | intron variant                  | MODIFIER | Pde9a      | ENSMUSG00000041119 | Transcript        | ENSMUST00000154392 | protein coding           | rs46553420  |
| 17:31469755-31469755 | intron_variant,non_coding_trans | MODIFIER | Pde9a      | ENSMUSG00000041119 | Transcript        | ENSMUST00000154567 | retained_intron          | rs46553420  |
| 17:31469755-31469755 | upstream_gene_variant           | MODIFIER | Pde9a      | ENSMUSG00000041119 | Transcript        | ENSMUST00000155113 | processed_transcript     | rs46553420  |
| 17:31471362-31471362 | intron variant                  | MODIFIER | Pde9a      | ENSMUSG00000041119 | Transcript        | ENSMUST00000047168 | protein coding           | rs48282767  |
| 17:31471362-31471362 | intron variant,NMD transcript v | MODIFIER | Pde9a      | ENSMUSG00000041119 | Transcript        | ENSMUST00000124902 | nonsense mediated decay  | rs48282767  |
| 17:31471362-31471362 | intron variant                  | MODIFIER | Pde9a      | ENSMUSG00000041119 | Transcript        | ENSMUST00000127929 | protein coding           | rs48282767  |
| 17:31471362-31471362 | intron variant,NMD transcript v | MODIFIER | Pde9a      | ENSMUSG00000041119 | Transcript        | ENSMUST00000131417 | nonsense mediated decay  | rs48282767  |
| 17:31471362-31471362 | intron variant                  | MODIFIER | Pde9a      | ENSMUSG00000041119 | Transcript        | ENSMUST00000134525 | protein coding           | rs48282767  |
| 17:31471362-31471362 | intron_variant,NMD_transcript_v | MODIFIER | Pde9a      | ENSMUSG00000041119 | Transcript        | ENSMUST00000137927 | nonsense_mediated_decay  | rs48282767  |
| 17:31471362-31471362 | intron_variant,NMD_transcript_v | MODIFIER | Pde9a      | ENSMUSG00000041119 | Transcript        | ENSMUST00000143549 | nonsense_mediated_decay  | rs48282767  |
| 17:31471362-31471362 | intron variant                  | MODIFIER | Pde9a      | ENSMUSG00000041119 | Transcript        | ENSMUST00000154392 | protein coding           | rs48282767  |
| 17:31471362-31471362 | intron variant,non coding trans | MODIFIER | Pde9a      | ENSMUSG00000041119 | Transcript        | ENSMUST00000154567 | retained intron          | rs48282767  |
| 17:31471362-31471362 | intron variant,non coding trans | MODIFIER | Pde9a      | ENSMUSG00000041119 | Transcript        | ENSMUST00000155113 | processed transcript     | rs48282767  |
| 17:31471362-31471362 | regulatory_region_variant       | MODIFIER | -          | -                  | RegulatoryFeature | ENSMUSR00000594165 | open_chromatin_region    | rs48282767  |
| 17:3310923-3310923   | downstream_gene_variant         | MODIFIER | AC165953.1 | ENSMUSG00000116838 | Transcript        | ENSMUST00000231500 | processed_pseudogene     | rs108618004 |
| 17:3310923-3310923   | downstream_gene_variant         | MODIFIER | AC165953.2 | ENSMUSG00000116858 | Transcript        | ENSMUST00000231987 | lincRNA                  | rs108618004 |
| 17:3310923-3310923   | non coding transcript exon var  | MODIFIER | AC165953.2 | ENSMUSG00000116858 | Transcript        | ENSMUST00000232042 | lincRNA                  | rs108618004 |
| 17:33304468-33304468 | downstream gene variant         | MODIFIER | Zfp955b    | ENSMUSG00000096910 | Transcript        | ENSMUST00000099414 | protein coding           | rs33335748  |
| 17:33304468-33304468 | downstream gene variant         | MODIFIER | Zfp422-ps  | ENSMUSG00000091515 | Transcript        | ENSMUST00000182230 | unprocessed_pseudogene   | rs33335748  |
| 17:33304481-33304481 | downstream gene variant         | MODIFIER | Zfp955b    | ENSMUSG00000096910 | Transcript        | ENSMUST00000099414 | protein coding           | rs29520403  |
| 17:33304481-33304481 | downstream_gene_variant         | MODIFIER | Zfp422-ps  | ENSMUSG00000091515 | Transcript        | ENSMUST00000182230 | unprocessed_pseudogene   | rs29520403  |
| 17:39845013-39845013 | upstream_gene_variant           | MODIFIER | Gm42418    | ENSMUSG00000098178 | Transcript        | ENSMUST00000182010 | lincRNA                  | -           |
| 17:39845013-39845013 | upstream_gene_variant           | MODIFIER | Gm26917    | ENSMUSG00000097971 | Transcript        | ENSMUST00000182520 | lincRNA                  | -           |
| 17:39845013-39845013 | non coding transcript exon var  | MODIFIER | Gm26917    | ENSMUSG00000097971 | Transcript        | ENSMUST00000192833 | lincRNA                  | -           |
| 17:39845013-39845013 | downstream gene variant         | MODIFIER | CT010467.1 | ENSMUSG00000106106 | Transcript        | ENSMUST00000198477 | rRNA                     | -           |
| 17:39845013-39845013 | downstream gene variant         | MODIFIER | AY036118   | ENSMUSG00000105361 | Transcript        | ENSMUST00000200021 | lincRNA                  | -           |
| 17:39845013-39845013 | downstream_gene_variant         | MODIFIER | CT010467.1 | ENSMUSG00000106106 | Transcript        | ENSMUST00000205406 | pseudogene               | -           |
| 17:39845013-39845013 | regulatory_region_variant       | MODIFIER | -          | -                  | RegulatoryFeature | ENSMUSR00000595179 | promoter_flanking_region | -           |
| 17:39848110-39848110 | non_coding_transcript_exon_var  | MODIFIER | Gm42418    | ENSMUSG00000098178 | Transcript        | ENSMUST00000182010 | lincRNA                  | rs108312641 |
| 17:39848110-39848110 | downstream gene variant         | MODIFIER | Gm26917    | ENSMUSG00000097971 | Transcript        | ENSMUST00000182520 | lincRNA                  | rs108312641 |
| 17:39848110-39848110 | downstream gene variant         | MODIFIER | Gm26917    | ENSMUSG00000097971 | Transcript        | ENSMUST00000192833 | lincRNA                  | rs108312641 |
| 17:39848110-39848110 | non coding transcript exon var  | MODIFIER | CT010467.1 | ENSMUSG00000106106 | Transcript        | ENSMUST00000198477 | rRNA                     | rs108312641 |
| 17:39848110-39848110 | upstream gene variant           | MODIFIER | AY036118   | ENSMUSG00000105361 | Transcript        | ENSMUST00000200021 | lincRNA                  | rs108312641 |
| 17:39848110-39848110 | non_coding_transcript_exon_var  | MODIFIER | CT010467.1 | ENSMUSG00000106106 | Transcript        | ENSMUST00000205406 | pseudogene               | rs108312641 |
| 17:39848110-39848110 | regulatory_region_variant       | MODIFIER | -          | -                  | RegulatoryFeature | ENSMUSR00000369412 | CTCF_binding_site        | rs108312641 |
| 17:39848110-39848110 | regulatory_region_variant       | MODIFIER | -          | -                  | RegulatoryFeature | ENSMUSR00000595179 | promoter_flanking_region | rs108312641 |

|                      |                                 |          |          |                     |                   |                     |                          |             |
|----------------------|---------------------------------|----------|----------|---------------------|-------------------|---------------------|--------------------------|-------------|
| 17:56176004-56176004 | 3 prime UTR variant             | MODIFIER | Mydgf    | ENSMUSG00000019579  | Transcript        | ENSMUST00000019723  | protein coding           | rs864305593 |
| 17:56176004-56176004 | downstream_gene_variant         | MODIFIER | Tnfaip81 | ENSMUSG00000044469  | Transcript        | ENSMUST00000077788  | protein_coding           | rs864305593 |
| 17:56176004-56176004 | downstream_gene_variant         | MODIFIER | Mydgf    | ENSMUSG00000019579  | Transcript        | ENSMUST00000140885  | retained_intron          | rs864305593 |
| 17:56176004-56176004 | downstream_gene_variant         | MODIFIER | Mydgf    | ENSMUSG00000019579  | Transcript        | ENSMUST00000151093  | processed_transcript     | rs864305593 |
| 17:56176004-56176004 | upstream gene variant           | MODIFIER | Gm44397  | ENSMUSG00000106418  | Transcript        | ENSMUST00000195950  | miRNA                    | rs864305593 |
| 17:71228688-71228688 | intron variant                  | MODIFIER | Lpin2    | ENSMUSG00000024052  | Transcript        | ENSMUST00000126681  | protein coding           | rs33533179  |
| 17:71228688-71228688 | intron variant                  | MODIFIER | Lpin2    | ENSMUSG00000024052  | Transcript        | ENSMUST00000129635  | protein coding           | rs33533179  |
| 17:71228688-71228688 | upstream_gene_variant           | MODIFIER | Lpin2    | ENSMUSG00000024052  | Transcript        | ENSMUST00000130750  | retained_intron          | rs33533179  |
| 17:71228688-71228688 | intron_variant,NMD_transcript_v | MODIFIER | Lpin2    | ENSMUSG00000024052  | Transcript        | ENSMUST00000135589  | nonsense_mediated_decay  | rs33533179  |
| 17:71228688-71228688 | intron_variant,non_coding_trans | MODIFIER | Lpin2    | ENSMUSG00000024052  | Transcript        | ENSMUST00000142842  | retained_intron          | rs33533179  |
| 17:71228688-71228688 | intron variant                  | MODIFIER | Lpin2    | ENSMUSG00000024052  | Transcript        | ENSMUST00000156570  | protein coding           | rs33533179  |
| 17:71228688-71228688 | intron variant,non coding trans | MODIFIER | Gm26561  | ENSMUSG00000097625  | Transcript        | ENSMUST00000180743  | lincRNA                  | rs33533179  |
| 17:71254664-71254664 | intron variant                  | MODIFIER | Emilin2  | ENSMUSG00000024053  | Transcript        | ENSMUST00000024849  | protein coding           | rs49168605  |
| 17:71254664-71254664 | downstream gene variant         | MODIFIER | Lpin2    | ENSMUSG00000024052  | Transcript        | ENSMUST00000129635  | protein coding           | rs49168605  |
| 17:71254664-71254664 | intron_variant,non_coding_trans | MODIFIER | Gm26561  | ENSMUSG00000097625  | Transcript        | ENSMUST00000180743  | lincRNA                  | rs49168605  |
| 17:71254664-71254664 | intron variant                  | MODIFIER | Emilin2  | ENSMUSG00000024053  | Transcript        | ENSMUST00000232777  | protein_coding           | rs49168605  |
| 17:71254664-71254664 | intron variant                  | MODIFIER | Emilin2  | ENSMUSG00000024053  | Transcript        | ENSMUST00000233057  | protein_coding           | rs49168605  |
| 17:71254664-71254664 | intron variant,non coding trans | MODIFIER | Emilin2  | ENSMUSG00000024053  | Transcript        | ENSMUST00000233083  | retained_intron          | rs49168605  |
| 17:71254664-71254664 | intron variant                  | MODIFIER | Emilin2  | ENSMUSG00000024053  | Transcript        | ENSMUST00000233148  | protein coding           | rs49168605  |
| 17:71254664-71254664 | intron variant                  | MODIFIER | Emilin2  | ENSMUSG00000024053  | Transcript        | ENSMUST00000233245  | protein coding           | rs49168605  |
| 17:71254664-71254664 | downstream_gene_variant         | MODIFIER | Emilin2  | ENSMUSG00000024053  | Transcript        | ENSMUST00000233677  | retained_intron          | rs49168605  |
| 17:71254664-71254664 | downstream_gene_variant         | MODIFIER | Emilin2  | ENSMUSG00000024053  | Transcript        | ENSMUST00000233698  | processed_transcript     | rs49168605  |
| 17:71254664-71254664 | regulatory_region_variant       | MODIFIER | -        | -                   | RegulatoryFeature | ENSMUSR00000126636  | promoter_flanking_region | rs49168605  |
| 17:71254664-71254664 | regulatory region variant       | MODIFIER | -        | -                   | RegulatoryFeature | ENSMUSR00000371568  | CTCF binding site        | rs49168605  |
| 17:71265477-71265477 | intron variant                  | MODIFIER | Emilin2  | ENSMUSG00000024053  | Transcript        | ENSMUST00000024849  | protein coding           | rs51803912  |
| 17:71265477-71265477 | intron variant,non coding trans | MODIFIER | Gm26561  | ENSMUSG00000097625  | Transcript        | ENSMUST00000180743  | lincRNA                  | rs51803912  |
| 17:71265477-71265477 | intron variant                  | MODIFIER | Emilin2  | ENSMUSG00000024053  | Transcript        | ENSMUST00000232777  | protein coding           | rs51803912  |
| 17:71265477-71265477 | intron variant                  | MODIFIER | Emilin2  | ENSMUSG00000024053  | Transcript        | ENSMUST00000233057  | protein_coding           | rs51803912  |
| 17:71265477-71265477 | intron variant                  | MODIFIER | Emilin2  | ENSMUSG00000024053  | Transcript        | ENSMUST00000233148  | protein_coding           | rs51803912  |
| 17:71265477-71265477 | intron variant                  | MODIFIER | Emilin2  | ENSMUSG00000024053  | Transcript        | ENSMUST00000233245  | protein_coding           | rs51803912  |
| 17:71265477-71265477 | upstream gene variant           | MODIFIER | Emilin2  | ENSMUSG00000024053  | Transcript        | ENSMUST00000233698  | processed transcript     | rs51803912  |
| 17:71265477-71265477 | regulatory region variant       | MODIFIER | -        | -                   | RegulatoryFeature | ENSMUSR00000126640  | promoter flanking region | rs51803912  |
| 17:71365890-71365890 | intron variant                  | MODIFIER | Smchd1   | ENSMUSG00000024054  | Transcript        | ENSMUST00000127430  | protein coding           | rs33380475  |
| 17:71365890-71365890 | upstream_gene_variant           | MODIFIER | Smchd1   | ENSMUSG00000024054  | Transcript        | ENSMUST00000147111  | retained_intron          | rs33380475  |
| 17:71365890-71365890 | intron_variant,non_coding_trans | MODIFIER | Gm26561  | ENSMUSG00000097625  | Transcript        | ENSMUST00000180743  | lincRNA                  | rs33380475  |
| 17:71365890-71365890 | upstream_gene_variant           | MODIFIER | Smchd1   | ENSMUSG00000024054  | Transcript        | ENSMUST00000182107  | retained_intron          | rs33380475  |
| 17:71365890-71365890 | downstream gene variant         | MODIFIER | Gm37639  | ENSMUSG00000102863  | Transcript        | ENSMUST00000191623  | TEC                      | rs33380475  |
| 18:10002708-10002708 | intron variant                  | MODIFIER | Usp14    | ENSMUSG000000047879 | Transcript        | ENSMUST00000092096  | protein coding           | rs30984331  |
| 18:10002708-10002708 | intron variant                  | MODIFIER | Usp14    | ENSMUSG000000047879 | Transcript        | ENSMUST00000116669  | protein coding           | rs30984331  |
| 18:10002708-10002708 | upstream gene variant           | MODIFIER | Usp14    | ENSMUSG000000047879 | Transcript        | ENSMUST00000133594  | retained_intron          | rs30984331  |
| 18:10002708-10002708 | intron_variant,non_coding_trans | MODIFIER | Usp14    | ENSMUSG000000047879 | Transcript        | ENSMUST00000154088  | retained_intron          | rs30984331  |
| 18:10010102-10010102 | intron variant                  | MODIFIER | Usp14    | ENSMUSG000000047879 | Transcript        | ENSMUST00000092096  | protein_coding           | rs30981425  |
| 18:10010102-10010102 | intron variant                  | MODIFIER | Usp14    | ENSMUSG000000047879 | Transcript        | ENSMUST00000116669  | protein_coding           | rs30981425  |
| 18:10010102-10010102 | intron variant,non coding trans | MODIFIER | Usp14    | ENSMUSG000000047879 | Transcript        | ENSMUST00000128334  | retained_intron          | rs30981425  |
| 18:10010102-10010102 | downstream gene variant         | MODIFIER | Usp14    | ENSMUSG000000047879 | Transcript        | ENSMUST00000145929  | retained_intron          | rs30981425  |
| 18:10010102-10010102 | upstream gene variant           | MODIFIER | Usp14    | ENSMUSG000000047879 | Transcript        | ENSMUST00000154088  | retained_intron          | rs30981425  |
| 18:10069709-10069709 | intron variant                  | MODIFIER | Rock1    | ENSMUSG00000024290  | Transcript        | ENSMUST00000067947  | protein_coding           | rs30017970  |
| 18:10070111-10070111 | intron variant                  | MODIFIER | Rock1    | ENSMUSG00000024290  | Transcript        | ENSMUST00000067947  | protein_coding           | rs584745048 |
| 18:10557120-10557120 | intron variant                  | MODIFIER | Greb1l   | ENSMUSG00000042942  | Transcript        | ENSMUST00000048977  | protein_coding           | rs243485023 |
| 18:10557120-10557120 | intron variant,non coding trans | MODIFIER | Greb1l   | ENSMUSG00000042942  | Transcript        | ENSMUST00000173261  | processed transcript     | rs243485023 |
| 18:10558734-10558734 | intron variant                  | MODIFIER | Greb1l   | ENSMUSG00000042942  | Transcript        | ENSMUST00000048977  | protein coding           | rs247048245 |
| 18:10558734-10558734 | intron variant,non coding trans | MODIFIER | Greb1l   | ENSMUSG00000042942  | Transcript        | ENSMUST00000173261  | processed transcript     | rs247048245 |
| 18:10623820-10623820 | intron variant                  | MODIFIER | Snrpd1   | ENSMUSG00000002477  | Transcript        | ENSMUST00000002551  | protein coding           | rs213197332 |
| 18:10623872-10623872 | intron variant                  | MODIFIER | Snrpd1   | ENSMUSG00000002477  | Transcript        | ENSMUST00000002551  | protein_coding           | rs235916212 |
| 18:10625942-10625942 | intron variant                  | MODIFIER | Snrpd1   | ENSMUSG00000002477  | Transcript        | ENSMUST00000002551  | protein_coding           | rs51601502  |
| 18:10625945-10625945 | intron variant                  | MODIFIER | Snrpd1   | ENSMUSG00000002477  | Transcript        | ENSMUST00000002551  | protein_coding           | rs46386758  |
| 18:10626144-10626144 | intron variant                  | MODIFIER | Snrpd1   | ENSMUSG00000002477  | Transcript        | ENSMUST00000002551  | protein coding           | rs256857636 |
| 18:10647772-10647772 | synonymous variant              | LOW      | Abhd3    | ENSMUSG00000002475  | Transcript        | ENSMUST00000002549  | protein coding           | rs30951978  |
| 18:10647772-10647772 | synonymous variant              | LOW      | Abhd3    | ENSMUSG00000002475  | Transcript        | ENSMUST00000117726  | protein coding           | rs30951978  |
| 18:10647772-10647772 | synonymous variant              | LOW      | Abhd3    | ENSMUSG00000002475  | Transcript        | ENSMUST00000117828  | protein_coding           | rs30951978  |
| 18:10647772-10647772 | synonymous variant              | LOW      | Abhd3    | ENSMUSG00000002475  | Transcript        | ENSMUST00000144150  | protein_coding           | rs30951978  |
| 18:11982459-11982459 | 3_prime_UTR_variant,NMD_trar    | MODIFIER | Tmem241  | ENSMUSG00000049411  | Transcript        | ENSMUST00000050228  | nonsense_mediated_decay  | rs31012381  |
| 18:11982459-11982459 | 3 prime UTR variant             | MODIFIER | Tmem241  | ENSMUSG00000049411  | Transcript        | ENSMUST00000055447  | protein coding           | rs31012381  |
| 18:11982459-11982459 | intron variant                  | MODIFIER | Tmem241  | ENSMUSG00000049411  | Transcript        | ENSMUST00000209628  | protein coding           | rs31012381  |
| 18:11982459-11982459 | downstream gene variant         | MODIFIER | Tmem241  | ENSMUSG00000049411  | Transcript        | ENSMUST00000209859  | protein coding           | rs31012381  |
| 18:11982459-11982459 | 3 prime UTR variant,NMD trar    | MODIFIER | Tmem241  | ENSMUSG00000049411  | Transcript        | ENSMUST00000211298  | nonsense mediated decay  | rs31012381  |
| 18:12137616-12137616 | intron variant                  | MODIFIER | Riok3    | ENSMUSG00000024404  | Transcript        | ENSMUST000000025270 | protein_coding           | rs6289920   |
| 18:12138764-12138764 | intron variant                  | MODIFIER | Riok3    | ENSMUSG00000024404  | Transcript        | ENSMUST000000025270 | protein_coding           | rs213920180 |
| 18:12140183-12140183 | intron variant                  | MODIFIER | Riok3    | ENSMUSG00000024404  | Transcript        | ENSMUST000000025270 | protein_coding           | rs583612945 |

|                      |                                 |          |         |                    |                   |                    |                         |             |
|----------------------|---------------------------------|----------|---------|--------------------|-------------------|--------------------|-------------------------|-------------|
| 18:12140183-12140183 | regulatory region variant       | MODIFIER | -       | -                  | RegulatoryFeature | ENSMUSR00000130743 | open chromatin region   | rs583612945 |
| 18:12140543-12140543 | intron_variant                  | MODIFIER | RioK3   | ENSMUSG00000024404 | Transcript        | ENSMUST00000025270 | protein_coding          | rs222777175 |
| 18:12140550-12140550 | intron_variant                  | MODIFIER | RioK3   | ENSMUSG00000024404 | Transcript        | ENSMUST00000025270 | protein_coding          | rs240953681 |
| 18:12140862-12140862 | intron_variant                  | MODIFIER | RioK3   | ENSMUSG00000024404 | Transcript        | ENSMUST00000025270 | protein_coding          | rs30995854  |
| 18:12141838-12141838 | intron_variant                  | MODIFIER | RioK3   | ENSMUSG00000024404 | Transcript        | ENSMUST00000025270 | protein_coding          | rs239564160 |
| 18:12146058-12146058 | intron_variant                  | MODIFIER | RioK3   | ENSMUSG00000024404 | Transcript        | ENSMUST00000025270 | protein_coding          | rs255933219 |
| 18:12146084-12146087 | intron_variant                  | MODIFIER | RioK3   | ENSMUSG00000024404 | Transcript        | ENSMUST00000025270 | protein_coding          | rs212207833 |
| 18:12146375-12146375 | intron_variant                  | MODIFIER | RioK3   | ENSMUSG00000024404 | Transcript        | ENSMUST00000025270 | protein_coding          | rs250017563 |
| 18:12153465-12153465 | intron_variant                  | MODIFIER | RioK3   | ENSMUSG00000024404 | Transcript        | ENSMUST00000025270 | protein_coding          | rs256786052 |
| 18:12154284-12154284 | intron_variant                  | MODIFIER | RioK3   | ENSMUSG00000024404 | Transcript        | ENSMUST00000025270 | protein_coding          | rs30996576  |
| 18:12154284-12154284 | regulatory region variant       | MODIFIER | -       | -                  | RegulatoryFeature | ENSMUSR00000374022 | TF binding site         | rs30996576  |
| 18:12154744-12154745 | intron_variant                  | MODIFIER | RioK3   | ENSMUSG00000024404 | Transcript        | ENSMUST00000025270 | protein_coding          | rs227118896 |
| 18:12154773-12154773 | intron_variant                  | MODIFIER | RioK3   | ENSMUSG00000024404 | Transcript        | ENSMUST00000025270 | protein_coding          | rs30995680  |
| 18:12180588-12180588 | intron_variant                  | MODIFIER | Rmc1    | ENSMUSG00000024410 | Transcript        | ENSMUST00000025276 | protein_coding          | rs30994919  |
| 18:12180588-12180588 | intron_variant,non_coding_trans | MODIFIER | Rmc1    | ENSMUSG00000024410 | Transcript        | ENSMUST00000126523 | retained_intron         | rs30994919  |
| 18:12180588-12180588 | intron_variant,non_coding_trans | MODIFIER | Rmc1    | ENSMUSG00000024410 | Transcript        | ENSMUST00000127123 | retained_intron         | rs30994919  |
| 18:12180588-12180588 | intron_variant                  | MODIFIER | Rmc1    | ENSMUSG00000024410 | Transcript        | ENSMUST00000134046 | protein_coding          | rs30994919  |
| 18:12180588-12180588 | intron variant,NMD transcript v | MODIFIER | Rmc1    | ENSMUSG00000024410 | Transcript        | ENSMUST00000138866 | nonsense mediated decay | rs30994919  |
| 18:12180588-12180588 | upstream gene variant           | MODIFIER | Rmc1    | ENSMUSG00000024410 | Transcript        | ENSMUST00000139151 | retained_intron         | rs30994919  |
| 18:12180588-12180588 | downstream gene variant         | MODIFIER | Rmc1    | ENSMUSG00000024410 | Transcript        | ENSMUST00000155431 | retained_intron         | rs30994919  |
| 18:12189967-12189968 | 3_prime_UTR_variant             | MODIFIER | Rmc1    | ENSMUSG00000024410 | Transcript        | ENSMUST00000025276 | protein_coding          | rs234365168 |
| 18:12189967-12189968 | 3_prime_UTR_variant             | MODIFIER | Npc1    | ENSMUSG00000024413 | Transcript        | ENSMUST00000025279 | protein_coding          | rs234365168 |
| 18:12189967-12189968 | non_coding_transcript_exon_var  | MODIFIER | Rmc1    | ENSMUSG00000024410 | Transcript        | ENSMUST00000127123 | retained_intron         | rs234365168 |
| 18:12189967-12189968 | non_coding transcript exon var  | MODIFIER | Rmc1    | ENSMUSG00000024410 | Transcript        | ENSMUST00000134756 | retained_intron         | rs234365168 |
| 18:12189967-12189968 | downstream gene variant         | MODIFIER | Rmc1    | ENSMUSG00000024410 | Transcript        | ENSMUST00000138866 | nonsense mediated decay | rs234365168 |
| 18:12189967-12189968 | non_coding transcript exon var  | MODIFIER | Rmc1    | ENSMUSG00000024410 | Transcript        | ENSMUST00000139151 | retained_intron         | rs234365168 |
| 18:12189967-12189968 | downstream gene variant         | MODIFIER | Rmc1    | ENSMUSG00000024410 | Transcript        | ENSMUST00000153233 | retained_intron         | rs234365168 |
| 18:12189967-12189968 | upstream_gene_variant           | MODIFIER | Gm15956 | ENSMUSG00000086935 | Transcript        | ENSMUST00000153352 | antisense               | rs234365168 |
| 18:12190114-12190114 | downstream_gene_variant         | MODIFIER | Rmc1    | ENSMUSG00000024410 | Transcript        | ENSMUST00000025276 | protein_coding          | rs13473454  |
| 18:12190114-12190114 | 3_prime_UTR_variant             | MODIFIER | Npc1    | ENSMUSG00000024413 | Transcript        | ENSMUST00000025279 | protein_coding          | rs13473454  |
| 18:12190114-12190114 | downstream gene variant         | MODIFIER | Rmc1    | ENSMUSG00000024410 | Transcript        | ENSMUST00000127123 | retained_intron         | rs13473454  |
| 18:12190114-12190114 | downstream gene variant         | MODIFIER | Rmc1    | ENSMUSG00000024410 | Transcript        | ENSMUST00000134756 | retained_intron         | rs13473454  |
| 18:12190114-12190114 | downstream gene variant         | MODIFIER | Rmc1    | ENSMUSG00000024410 | Transcript        | ENSMUST00000138866 | nonsense mediated decay | rs13473454  |
| 18:12190114-12190114 | downstream_gene_variant         | MODIFIER | Rmc1    | ENSMUSG00000024410 | Transcript        | ENSMUST00000139151 | retained_intron         | rs13473454  |
| 18:12190114-12190114 | downstream_gene_variant         | MODIFIER | Rmc1    | ENSMUSG00000024410 | Transcript        | ENSMUST00000153233 | retained_intron         | rs13473454  |
| 18:12190114-12190114 | upstream_gene_variant           | MODIFIER | Gm15956 | ENSMUSG00000086935 | Transcript        | ENSMUST00000153352 | antisense               | rs13473454  |
| 18:12210061-12210061 | intron_variant                  | MODIFIER | Npc1    | ENSMUSG00000024413 | Transcript        | ENSMUST00000025279 | protein_coding          | rs30984496  |
| 18:12210061-12210061 | downstream gene variant         | MODIFIER | Npc1    | ENSMUSG00000024413 | Transcript        | ENSMUST00000145771 | processed transcript    | rs30984496  |
| 18:12643527-12643527 | 5 prime UTR variant             | MODIFIER | Ttc39c  | ENSMUSG00000024424 | Transcript        | ENSMUST00000025294 | protein_coding          | rs248193761 |
| 18:12643527-12643527 | non_coding transcript exon var  | MODIFIER | Ttc39c  | ENSMUSG00000024424 | Transcript        | ENSMUST00000141060 | retained_intron         | rs248193761 |
| 18:12643527-12643527 | intron_variant                  | MODIFIER | Ttc39c  | ENSMUSG00000024424 | Transcript        | ENSMUST00000169401 | protein_coding          | rs248193761 |
| 18:12643527-12643527 | regulatory_region_variant       | MODIFIER | -       | -                  | RegulatoryFeature | ENSMUSR00000130823 | promoter                | rs248193761 |
| 18:12686954-12686954 | splice_region_variant,synonymoi | LOW      | Ttc39c  | ENSMUSG00000024424 | Transcript        | ENSMUST00000025294 | protein_coding          | rs29679431  |
| 18:12686954-12686954 | splice region variant,non codin | LOW      | Ttc39c  | ENSMUSG00000024424 | Transcript        | ENSMUST00000141060 | retained_intron         | rs29679431  |
| 18:12686954-12686954 | splice region variant,synonymoi | LOW      | Ttc39c  | ENSMUSG00000024424 | Transcript        | ENSMUST00000169401 | protein_coding          | rs29679431  |
| 18:12728664-12728664 | missense variant                | MODERATE | Ttc39c  | ENSMUSG00000024424 | Transcript        | ENSMUST00000025294 | protein_coding          | rs46768393  |
| 18:12728664-12728664 | missense_variant                | MODERATE | Ttc39c  | ENSMUSG00000024424 | Transcript        | ENSMUST00000169401 | protein_coding          | rs46768393  |
| 18:12926462-12926462 | intron_variant                  | MODIFIER | Osbpl1a | ENSMUSG00000044252 | Transcript        | ENSMUST00000074352 | protein_coding          | rs31061008  |
| 18:12926462-12926462 | intron_variant                  | MODIFIER | Osbpl1a | ENSMUSG00000044252 | Transcript        | ENSMUST00000122175 | protein_coding          | rs31061008  |
| 18:12926462-12926462 | intron variant,non_coding_trans | MODIFIER | Osbpl1a | ENSMUSG00000044252 | Transcript        | ENSMUST00000132594 | retained_intron         | rs31061008  |
| 18:12926462-12926462 | downstream gene variant         | MODIFIER | Osbpl1a | ENSMUSG00000044252 | Transcript        | ENSMUST00000141651 | retained_intron         | rs31061008  |
| 18:12926462-12926462 | intron variant,NMD transcript v | MODIFIER | Osbpl1a | ENSMUSG00000044252 | Transcript        | ENSMUST00000147197 | nonsense mediated decay | rs31061008  |
| 18:12926462-12926462 | regulatory region variant       | MODIFIER | -       | -                  | RegulatoryFeature | ENSMUSR00000602883 | enhancer                | rs31061008  |
| 18:12927590-12927590 | intron_variant                  | MODIFIER | Osbpl1a | ENSMUSG00000044252 | Transcript        | ENSMUST00000074352 | protein_coding          | rs250466392 |
| 18:12927590-12927590 | intron_variant                  | MODIFIER | Osbpl1a | ENSMUSG00000044252 | Transcript        | ENSMUST00000122175 | protein_coding          | rs250466392 |
| 18:12927590-12927590 | intron_variant,non_coding_trans | MODIFIER | Osbpl1a | ENSMUSG00000044252 | Transcript        | ENSMUST00000132594 | retained_intron         | rs250466392 |
| 18:12927590-12927590 | downstream gene variant         | MODIFIER | Osbpl1a | ENSMUSG00000044252 | Transcript        | ENSMUST00000141651 | retained_intron         | rs250466392 |
| 18:12927590-12927590 | intron variant,NMD transcript v | MODIFIER | Osbpl1a | ENSMUSG00000044252 | Transcript        | ENSMUST00000147197 | nonsense mediated decay | rs250466392 |
| 18:12927971-12927971 | intron_variant                  | MODIFIER | Osbpl1a | ENSMUSG00000044252 | Transcript        | ENSMUST00000074352 | protein_coding          | rs243224283 |
| 18:12927971-12927971 | intron_variant                  | MODIFIER | Osbpl1a | ENSMUSG00000044252 | Transcript        | ENSMUST00000122175 | protein_coding          | rs243224283 |
| 18:12927971-12927971 | intron_variant,non_coding_trans | MODIFIER | Osbpl1a | ENSMUSG00000044252 | Transcript        | ENSMUST00000132594 | retained_intron         | rs243224283 |
| 18:12927971-12927971 | downstream_gene_variant         | MODIFIER | Osbpl1a | ENSMUSG00000044252 | Transcript        | ENSMUST00000141651 | retained_intron         | rs243224283 |
| 18:12927971-12927971 | intron variant,NMD transcript v | MODIFIER | Osbpl1a | ENSMUSG00000044252 | Transcript        | ENSMUST00000147197 | nonsense mediated decay | rs243224283 |
| 18:12941650-12941650 | 5 prime UTR variant             | MODIFIER | Osbpl1a | ENSMUSG00000044252 | Transcript        | ENSMUST00000074352 | protein_coding          | rs228090504 |
| 18:12941650-12941650 | 5 prime UTR variant             | MODIFIER | Osbpl1a | ENSMUSG00000044252 | Transcript        | ENSMUST00000122175 | protein_coding          | rs228090504 |
| 18:12941650-12941650 | non_coding transcript exon var  | MODIFIER | Osbpl1a | ENSMUSG00000044252 | Transcript        | ENSMUST00000132594 | retained_intron         | rs228090504 |
| 18:12941650-12941650 | non_coding_transcript_exon_var  | MODIFIER | Osbpl1a | ENSMUSG00000044252 | Transcript        | ENSMUST00000141651 | retained_intron         | rs228090504 |
| 18:12941650-12941650 | non_coding transcript exon var  | MODIFIER | Osbpl1a | ENSMUSG00000044252 | Transcript        | ENSMUST00000142467 | processed transcript    | rs228090504 |
| 18:12941650-12941650 | 5_prime_UTR_variant,NMD_trar    | MODIFIER | Osbpl1a | ENSMUSG00000044252 | Transcript        | ENSMUST00000147197 | nonsense_mediated_decay | rs228090504 |

|                      |                                 |          |            |                    |                   |                    |                          |             |
|----------------------|---------------------------------|----------|------------|--------------------|-------------------|--------------------|--------------------------|-------------|
| 18:12941650-12941650 | regulatory region variant       | MODIFIER | -          | -                  | RegulatoryFeature | ENSMUSR00000130917 | promoter                 | rs228090504 |
| 18:12957810-12957810 | upstream_gene_variant           | MODIFIER | Gm26407    | ENSMUSG00000089129 | Transcript        | ENSMUST00000158504 | misc_RNA                 | rs29720003  |
| 18:12957810-12957810 | regulatory_region_variant       | MODIFIER | -          | -                  | RegulatoryFeature | ENSMUSR00000130921 | promoter_flanking_region | rs29720003  |
| 18:12959499-12959499 | upstream_gene_variant           | MODIFIER | Gm26407    | ENSMUSG00000089129 | Transcript        | ENSMUST00000158504 | misc_RNA                 | rs251693533 |
| 18:12965624-12965624 | downstream gene variant         | MODIFIER | Gm26407    | ENSMUSG00000089129 | Transcript        | ENSMUST00000158504 | misc_RNA                 | rs51216894  |
| 18:12967918-12967918 | upstream gene variant           | MODIFIER | Impact     | ENSMUSG00000024423 | Transcript        | ENSMUST00000025290 | protein coding           | rs31058810  |
| 18:12971989-12971989 | upstream gene variant           | MODIFIER | Impact     | ENSMUSG00000024423 | Transcript        | ENSMUST00000025290 | protein coding           | rs6384990   |
| 18:12979939-12979939 | intron_variant                  | MODIFIER | Impact     | ENSMUSG00000024423 | Transcript        | ENSMUST00000025290 | protein coding           | rs108196979 |
| 18:14571023-14571023 | downstream_gene_variant         | MODIFIER | Gm6457     | ENSMUSG00000053740 | Transcript        | ENSMUST00000066378 | processed_pseudogene     | -           |
| 18:14762131-14762131 | 3_prime_UTR_variant             | MODIFIER | Psma8      | ENSMUSG00000036743 | Transcript        | ENSMUST00000040860 | protein coding           | rs30016825  |
| 18:20699319-20699319 | intron variant                  | MODIFIER | B4galt6    | ENSMUSG00000056124 | Transcript        | ENSMUST00000070080 | protein coding           | rs31316994  |
| 18:20829356-20829356 | intron variant                  | MODIFIER | Trappc8    | ENSMUSG00000033382 | Transcript        | ENSMUST00000025177 | protein coding           | rs31308543  |
| 18:20829356-20829356 | non coding transcript exon var  | MODIFIER | Trappc8    | ENSMUSG00000033382 | Transcript        | ENSMUST00000225502 | retained intron          | rs31308543  |
| 18:20829356-20829356 | intron variant                  | MODIFIER | Trappc8    | ENSMUSG00000033382 | Transcript        | ENSMUST00000225661 | protein coding           | rs31308543  |
| 18:30342741-30342741 | missense_variant                | MODERATE | Pik3c3     | ENSMUSG00000033628 | Transcript        | ENSMUST00000091978 | protein coding           | rs49405313  |
| 18:30342741-30342741 | intron_variant                  | MODIFIER | Pik3c3     | ENSMUSG00000033628 | Transcript        | ENSMUST00000115812 | protein coding           | rs49405313  |
| 18:30342741-30342741 | intron_variant,NMD_transcript_v | MODIFIER | Pik3c3     | ENSMUSG00000033628 | Transcript        | ENSMUST00000131405 | nonsense_mediated_decay  | rs49405313  |
| 18:31597312-31597312 | intron variant                  | MODIFIER | Slc25a46   | ENSMUSG00000024259 | Transcript        | ENSMUST00000060396 | protein coding           | rs29871182  |
| 18:31618829-31618829 | intergenic variant              | MODIFIER | -          | -                  | -                 | -                  | -                        | rs30051486  |
| 18:31865295-31865295 | intron variant                  | MODIFIER | Wdr33      | ENSMUSG00000024400 | Transcript        | ENSMUST00000025264 | protein coding           | rs30262899  |
| 18:31865295-31865295 | upstream_gene_variant           | MODIFIER | Gm26823    | ENSMUSG00000096926 | Transcript        | ENSMUST00000181425 | lincRNA                  | rs30262899  |
| 18:31907862-31907862 | 3_prime_UTR_variant             | MODIFIER | Wdr33      | ENSMUSG00000024400 | Transcript        | ENSMUST00000025264 | protein coding           | rs48229800  |
| 18:31907862-31907862 | downstream_gene_variant         | MODIFIER | Sft2d3     | ENSMUSG00000044982 | Transcript        | ENSMUST00000054984 | protein coding           | rs48229800  |
| 18:33795620-33795620 | downstream gene variant         | MODIFIER | Epb4114a   | ENSMUSG00000024376 | Transcript        | ENSMUST00000025234 | protein coding           | rs51979167  |
| 18:33795620-33795620 | intron variant,non coding trans | MODIFIER | Epb4114aos | ENSMUSG00000087590 | Transcript        | ENSMUST00000146010 | lincRNA                  | rs51979167  |
| 18:33795620-33795620 | downstream gene variant         | MODIFIER | Gm23639    | ENSMUSG00000092819 | Transcript        | ENSMUST00000175078 | snoRNA                   | rs51979167  |
| 18:33795620-33795620 | intron variant,non coding trans | MODIFIER | Epb4114aos | ENSMUSG00000087590 | Transcript        | ENSMUST00000179138 | lincRNA                  | rs51979167  |
| 18:33795620-33795620 | regulatory_region_variant       | MODIFIER | -          | -                  | RegulatoryFeature | ENSMUSR00000132500 | promoter                 | rs51979167  |
| 18:33795621-33795621 | downstream_gene_variant         | MODIFIER | Epb4114a   | ENSMUSG00000024376 | Transcript        | ENSMUST00000025234 | protein coding           | rs107733986 |
| 18:33795621-33795621 | intron_variant,non_coding_trans | MODIFIER | Epb4114aos | ENSMUSG00000087590 | Transcript        | ENSMUST00000146010 | lincRNA                  | rs107733986 |
| 18:33795621-33795621 | downstream gene variant         | MODIFIER | Gm23639    | ENSMUSG00000092819 | Transcript        | ENSMUST00000175078 | snoRNA                   | rs107733986 |
| 18:33795621-33795621 | intron_variant,non coding trans | MODIFIER | Epb4114aos | ENSMUSG00000087590 | Transcript        | ENSMUST00000179138 | lincRNA                  | rs107733986 |
| 18:33795621-33795621 | regulatory region variant       | MODIFIER | -          | -                  | RegulatoryFeature | ENSMUSR00000132500 | promoter                 | rs107733986 |
| 18:34333007-34333007 | intron_variant                  | MODIFIER | Srp19      | ENSMUSG00000014504 | Transcript        | ENSMUST00000072576 | protein coding           | rs31610221  |
| 18:34333007-34333007 | intron_variant                  | MODIFIER | Srp19      | ENSMUSG00000014504 | Transcript        | ENSMUST00000119329 | protein coding           | rs31610221  |
| 18:34333007-34333007 | intron_variant,non_coding_trans | MODIFIER | Srp19      | ENSMUSG00000014504 | Transcript        | ENSMUST00000126518 | processed_transcript     | rs31610221  |
| 18:34333007-34333007 | intron variant,non coding trans | MODIFIER | Srp19      | ENSMUSG00000014504 | Transcript        | ENSMUST00000131713 | processed_transcript     | rs31610221  |
| 18:34333007-34333007 | non coding transcript exon var  | MODIFIER | Srp19      | ENSMUSG00000014504 | Transcript        | ENSMUST00000140279 | retained intron          | rs31610221  |
| 18:34333007-34333007 | 3 prime UTR variant,NMD trar    | MODIFIER | Srp19      | ENSMUSG00000014504 | Transcript        | ENSMUST00000142010 | nonsense mediated decay  | rs31610221  |
| 18:34635017-34635017 | intron variant                  | MODIFIER | Cdc23      | ENSMUSG00000024370 | Transcript        | ENSMUST00000025228 | protein coding           | rs242255940 |
| 18:34635017-34635017 | downstream_gene_variant         | MODIFIER | Cdc23      | ENSMUSG00000024370 | Transcript        | ENSMUST00000133162 | retained_intron          | rs242255940 |
| 18:34635017-34635017 | intron_variant                  | MODIFIER | Cdc23      | ENSMUSG00000024370 | Transcript        | ENSMUST00000133181 | protein coding           | rs242255940 |
| 18:34635017-34635017 | downstream_gene_variant         | MODIFIER | Cdc23      | ENSMUSG00000024370 | Transcript        | ENSMUST00000136949 | retained_intron          | rs242255940 |
| 18:34635017-34635017 | upstream gene variant           | MODIFIER | Cdc23      | ENSMUSG00000024370 | Transcript        | ENSMUST00000138400 | retained intron          | rs242255940 |
| 18:34635017-34635017 | downstream gene variant         | MODIFIER | Cdc23      | ENSMUSG00000024370 | Transcript        | ENSMUST00000155307 | retained intron          | rs242255940 |
| 18:34635017-34635017 | downstream gene variant         | MODIFIER | Kif20a     | ENSMUSG00000003779 | Transcript        | ENSMUST00000166044 | protein coding           | rs242255940 |
| 18:34635017-34635017 | downstream_gene_variant         | MODIFIER | Kif20a     | ENSMUSG00000003779 | Transcript        | ENSMUST00000167161 | protein coding           | rs242255940 |
| 18:34764161-34764161 | intron_variant                  | MODIFIER | Fam53c     | ENSMUSG00000034300 | Transcript        | ENSMUST00000049281 | protein coding           | rs47136197  |
| 18:34764161-34764161 | intron_variant                  | MODIFIER | Fam53c     | ENSMUSG00000034300 | Transcript        | ENSMUST00000097622 | protein coding           | rs47136197  |
| 18:34813368-34813368 | intron variant                  | MODIFIER | Kdm3b      | ENSMUSG00000038773 | Transcript        | ENSMUST00000043775 | protein coding           | rs29885409  |
| 18:34813368-34813368 | upstream gene variant           | MODIFIER | Kdm3b      | ENSMUSG00000038773 | Transcript        | ENSMUST00000224065 | processed transcript     | rs29885409  |
| 18:34813368-34813368 | intron variant,NMD transcript v | MODIFIER | Kdm3b      | ENSMUSG00000038773 | Transcript        | ENSMUST00000225195 | nonsense mediated decay  | rs29885409  |
| 18:34917804-34917804 | intron variant                  | MODIFIER | Etf1       | ENSMUSG00000024360 | Transcript        | ENSMUST00000025218 | protein coding           | rs220699929 |
| 18:34917804-34917804 | regulatory_region_variant       | MODIFIER | -          | -                  | RegulatoryFeature | ENSMUSR00000132713 | promoter_flanking_region | rs220699929 |
| 18:34932802-34932803 | downstream_gene_variant         | MODIFIER | Hspa9      | ENSMUSG00000024359 | Transcript        | ENSMUST00000025217 | protein coding           | rs239770975 |
| 18:34932802-34932803 | upstream_gene_variant           | MODIFIER | Etf1       | ENSMUSG00000024360 | Transcript        | ENSMUST00000025218 | protein coding           | rs239770975 |
| 18:34932802-34932803 | upstream gene variant           | MODIFIER | Etf1       | ENSMUSG00000024360 | Transcript        | ENSMUST00000180351 | protein coding           | rs239770975 |
| 18:34932802-34932803 | regulatory region variant       | MODIFIER | -          | -                  | RegulatoryFeature | ENSMUSR00000132718 | promoter                 | rs239770975 |
| 18:34933786-34933786 | downstream gene variant         | MODIFIER | Hspa9      | ENSMUSG00000024359 | Transcript        | ENSMUST00000025217 | protein coding           | rs223140497 |
| 18:34933786-34933786 | upstream_gene_variant           | MODIFIER | Etf1       | ENSMUSG00000024360 | Transcript        | ENSMUST00000025218 | protein coding           | rs223140497 |
| 18:34933786-34933786 | downstream_gene_variant         | MODIFIER | Hspa9      | ENSMUSG00000024359 | Transcript        | ENSMUST00000172829 | retained_intron          | rs223140497 |
| 18:34933786-34933786 | downstream_gene_variant         | MODIFIER | Hspa9      | ENSMUSG00000024359 | Transcript        | ENSMUST00000173701 | retained_intron          | rs223140497 |
| 18:34933786-34933786 | upstream gene variant           | MODIFIER | Etf1       | ENSMUSG00000024360 | Transcript        | ENSMUST00000180351 | protein coding           | rs223140497 |
| 18:34933786-34933786 | regulatory region variant       | MODIFIER | -          | -                  | RegulatoryFeature | ENSMUSR00000132718 | promoter                 | rs223140497 |
| 18:34933978-34933978 | downstream gene variant         | MODIFIER | Hspa9      | ENSMUSG00000024359 | Transcript        | ENSMUST00000025217 | protein coding           | rs31816692  |
| 18:34933978-34933978 | upstream gene variant           | MODIFIER | Etf1       | ENSMUSG00000024360 | Transcript        | ENSMUST00000025218 | protein coding           | rs31816692  |
| 18:34933978-34933978 | downstream_gene_variant         | MODIFIER | Hspa9      | ENSMUSG00000024359 | Transcript        | ENSMUST00000172829 | retained_intron          | rs31816692  |
| 18:34933978-34933978 | downstream_gene_variant         | MODIFIER | Hspa9      | ENSMUSG00000024359 | Transcript        | ENSMUST00000173701 | retained_intron          | rs31816692  |
| 18:34933978-34933978 | upstream_gene_variant           | MODIFIER | Etf1       | ENSMUSG00000024360 | Transcript        | ENSMUST00000180351 | protein coding           | rs31816692  |

|                      |                                       |          |               |                    |                   |                    |                          |             |
|----------------------|---------------------------------------|----------|---------------|--------------------|-------------------|--------------------|--------------------------|-------------|
| 18:34933978-34933978 | regulatory region variant             | MODIFIER | -             | -                  | RegulatoryFeature | ENSMUSR00000604667 | CTCF binding site        | rs31816692  |
| 18:35650677-35650677 | upstream_gene_variant                 | MODIFIER | Mzb1          | ENSMUSG00000024353 | Transcript        | ENSMUST00000025211 | protein_coding           | rs243462458 |
| 18:35650677-35650677 | downstream_gene_variant               | MODIFIER | Prob1         | ENSMUSG00000073600 | Transcript        | ENSMUST00000097619 | protein_coding           | rs243462458 |
| 18:35650677-35650677 | non_coding_transcript_exon_variant    | MODIFIER | Prob1         | ENSMUSG00000073600 | Transcript        | ENSMUST00000186951 | processed_transcript     | rs243462458 |
| 18:35650677-35650677 | 3 prime UTR variant                   | MODIFIER | Prob1         | ENSMUSG00000073600 | Transcript        | ENSMUST00000190196 | protein_coding           | rs243462458 |
| 18:35671710-35671710 | 3 prime UTR variant                   | MODIFIER | Dnajc18       | ENSMUSG00000024350 | Transcript        | ENSMUST00000025208 | protein_coding           | rs256819209 |
| 18:35671710-35671710 | regulatory region variant             | MODIFIER | -             | -                  | RegulatoryFeature | ENSMUSR00000375377 | promoter flanking region | rs256819209 |
| 18:35671925-35671925 | 3_prime_UTR_variant                   | MODIFIER | Dnajc18       | ENSMUSG00000024350 | Transcript        | ENSMUST00000025208 | protein_coding           | rs264632657 |
| 18:35671925-35671925 | regulatory region variant             | MODIFIER | -             | -                  | RegulatoryFeature | ENSMUSR00000375377 | promoter flanking region | rs264632657 |
| 18:35673317-35673318 | 3_prime_UTR_variant                   | MODIFIER | Dnajc18       | ENSMUSG00000024350 | Transcript        | ENSMUST00000025208 | protein_coding           | rs248460133 |
| 18:35673317-35673318 | regulatory region variant             | MODIFIER | -             | -                  | RegulatoryFeature | ENSMUSR00000375377 | promoter flanking region | rs248460133 |
| 18:35673421-35673421 | 3 prime UTR variant                   | MODIFIER | Dnajc18       | ENSMUSG00000024350 | Transcript        | ENSMUST00000025208 | protein_coding           | rs237527297 |
| 18:35673421-35673421 | regulatory region variant             | MODIFIER | -             | -                  | RegulatoryFeature | ENSMUSR00000375377 | promoter flanking region | rs237527297 |
| 18:35735360-35735360 | downstream gene variant               | MODIFIER | 1700066B19Rik | ENSMUSG00000073598 | Transcript        | ENSMUST00000097617 | protein_coding           | rs45914274  |
| 18:35735360-35735360 | intron_variant                        | MODIFIER | Tmem173       | ENSMUSG00000024349 | Transcript        | ENSMUST00000115728 | protein_coding           | rs45914274  |
| 18:35736698-35736698 | intron_variant                        | MODIFIER | Tmem173       | ENSMUSG00000024349 | Transcript        | ENSMUST00000115728 | protein_coding           | rs31809053  |
| 18:35737513-35737513 | intron_variant                        | MODIFIER | Tmem173       | ENSMUSG00000024349 | Transcript        | ENSMUST00000115728 | protein_coding           | rs250876225 |
| 18:35737668-35737668 | intron variant                        | MODIFIER | Tmem173       | ENSMUSG00000024349 | Transcript        | ENSMUST00000115728 | protein_coding           | rs236736179 |
| 18:35738026-35738026 | intron variant                        | MODIFIER | Tmem173       | ENSMUSG00000024349 | Transcript        | ENSMUST00000115728 | protein_coding           | rs31809052  |
| 18:35738465-35738465 | intron variant                        | MODIFIER | Tmem173       | ENSMUSG00000024349 | Transcript        | ENSMUST00000115728 | protein_coding           | rs226434147 |
| 18:36015804-36015804 | downstream_gene_variant               | MODIFIER | Nrg2          | ENSMUSG00000060275 | Transcript        | ENSMUST00000115713 | protein_coding           | rs29766190  |
| 18:36015804-36015804 | downstream_gene_variant               | MODIFIER | Psd2          | ENSMUSG00000024347 | Transcript        | ENSMUST00000115716 | protein_coding           | rs29766190  |
| 18:36015804-36015804 | downstream_gene_variant               | MODIFIER | Psd2          | ENSMUSG00000024347 | Transcript        | ENSMUST00000175734 | protein_coding           | rs29766190  |
| 18:36015804-36015804 | downstream gene variant               | MODIFIER | Psd2          | ENSMUSG00000024347 | Transcript        | ENSMUST00000176472 | nonsense mediated decay  | rs29766190  |
| 18:36015804-36015804 | downstream gene variant               | MODIFIER | Psd2          | ENSMUSG00000024347 | Transcript        | ENSMUST00000176873 | protein_coding           | rs29766190  |
| 18:36015804-36015804 | downstream gene variant               | MODIFIER | Psd2          | ENSMUSG00000024347 | Transcript        | ENSMUST00000177432 | protein_coding           | rs29766190  |
| 18:36015821-36015821 | downstream gene variant               | MODIFIER | Nrg2          | ENSMUSG00000060275 | Transcript        | ENSMUST00000115713 | protein_coding           | rs29679550  |
| 18:36015821-36015821 | downstream_gene_variant               | MODIFIER | Psd2          | ENSMUSG00000024347 | Transcript        | ENSMUST00000115716 | protein_coding           | rs29679550  |
| 18:36015821-36015821 | downstream_gene_variant               | MODIFIER | Psd2          | ENSMUSG00000024347 | Transcript        | ENSMUST00000175734 | protein_coding           | rs29679550  |
| 18:36015821-36015821 | downstream_gene_variant               | MODIFIER | Psd2          | ENSMUSG00000024347 | Transcript        | ENSMUST00000176472 | nonsense mediated decay  | rs29679550  |
| 18:36015821-36015821 | downstream gene variant               | MODIFIER | Psd2          | ENSMUSG00000024347 | Transcript        | ENSMUST00000176873 | protein_coding           | rs29679550  |
| 18:36015821-36015821 | downstream gene variant               | MODIFIER | Psd2          | ENSMUSG00000024347 | Transcript        | ENSMUST00000177432 | protein_coding           | rs29679550  |
| 18:36015860-36015860 | downstream gene variant               | MODIFIER | Nrg2          | ENSMUSG00000060275 | Transcript        | ENSMUST00000115713 | protein_coding           | rs30261808  |
| 18:36015860-36015860 | downstream_gene_variant               | MODIFIER | Psd2          | ENSMUSG00000024347 | Transcript        | ENSMUST00000115716 | protein_coding           | rs30261808  |
| 18:36015860-36015860 | downstream_gene_variant               | MODIFIER | Psd2          | ENSMUSG00000024347 | Transcript        | ENSMUST00000115716 | protein_coding           | rs30261808  |
| 18:36015860-36015860 | downstream_gene_variant               | MODIFIER | Psd2          | ENSMUSG00000024347 | Transcript        | ENSMUST00000175734 | protein_coding           | rs30261808  |
| 18:36015860-36015860 | downstream gene variant               | MODIFIER | Psd2          | ENSMUSG00000024347 | Transcript        | ENSMUST00000176472 | nonsense mediated decay  | rs30261808  |
| 18:36015860-36015860 | downstream gene variant               | MODIFIER | Psd2          | ENSMUSG00000024347 | Transcript        | ENSMUST00000176873 | protein_coding           | rs30261808  |
| 18:36015860-36015860 | downstream gene variant               | MODIFIER | Psd2          | ENSMUSG00000024347 | Transcript        | ENSMUST00000177432 | protein_coding           | rs30261808  |
| 18:36016006-36016006 | downstream gene variant               | MODIFIER | Nrg2          | ENSMUSG00000060275 | Transcript        | ENSMUST00000115713 | protein_coding           | rs30306412  |
| 18:36016006-36016006 | downstream gene variant               | MODIFIER | Psd2          | ENSMUSG00000024347 | Transcript        | ENSMUST00000115716 | protein_coding           | rs30306412  |
| 18:36016006-36016006 | downstream_gene_variant               | MODIFIER | Psd2          | ENSMUSG00000024347 | Transcript        | ENSMUST00000175734 | protein_coding           | rs30306412  |
| 18:36016006-36016006 | downstream_gene_variant               | MODIFIER | Psd2          | ENSMUSG00000024347 | Transcript        | ENSMUST00000176472 | nonsense mediated decay  | rs30306412  |
| 18:36016006-36016006 | downstream_gene_variant               | MODIFIER | Psd2          | ENSMUSG00000024347 | Transcript        | ENSMUST00000176873 | protein_coding           | rs30306412  |
| 18:36016006-36016006 | downstream gene variant               | MODIFIER | Psd2          | ENSMUSG00000024347 | Transcript        | ENSMUST00000177432 | protein_coding           | rs30306412  |
| 18:36033743-36033743 | intron variant,non coding trans       | MODIFIER | Nrg2          | ENSMUSG00000060275 | Transcript        | ENSMUST00000115705 | processed_transcript     | rs30308720  |
| 18:36033743-36033743 | intron variant                        | MODIFIER | Nrg2          | ENSMUSG00000060275 | Transcript        | ENSMUST00000115712 | protein_coding           | rs30308720  |
| 18:36033743-36033743 | intron_variant                        | MODIFIER | Nrg2          | ENSMUSG00000060275 | Transcript        | ENSMUST00000115713 | protein_coding           | rs30308720  |
| 18:36033743-36033743 | intron_variant,non coding trans       | MODIFIER | Nrg2          | ENSMUSG00000060275 | Transcript        | ENSMUST00000115713 | protein_coding           | rs30308720  |
| 18:36033743-36033743 | intron_variant,non coding trans       | MODIFIER | Nrg2          | ENSMUSG00000060275 | Transcript        | ENSMUST00000225173 | processed_transcript     | rs30308720  |
| 18:36660759-36660759 | downstream_gene_variant               | MODIFIER | Ankhd1        | ENSMUSG00000024483 | Transcript        | ENSMUST00000006205 | nonsense mediated decay  | rs31793384  |
| 18:36660759-36660759 | upstream gene variant                 | MODIFIER | Eif4ebp3      | ENSMUSG00000090264 | Transcript        | ENSMUST00000036765 | protein_coding           | rs31793384  |
| 18:36660759-36660759 | downstream gene variant               | MODIFIER | Ankhd1        | ENSMUSG00000024483 | Transcript        | ENSMUST00000037072 | protein_coding           | rs31793384  |
| 18:36660759-36660759 | downstream gene variant               | MODIFIER | Ankhd1        | ENSMUSG00000024483 | Transcript        | ENSMUST00000116653 | protein_coding           | rs31793384  |
| 18:36660759-36660759 | intron variant                        | MODIFIER | Ankhd1        | ENSMUSG00000024483 | Transcript        | ENSMUST00000140061 | protein_coding           | rs31793384  |
| 18:36660759-36660759 | intron_variant,NMD_transcript_variant | MODIFIER | Ankhd1        | ENSMUSG00000024483 | Transcript        | ENSMUST00000142977 | nonsense mediated decay  | rs31793384  |
| 18:36660759-36660759 | downstream_gene_variant               | MODIFIER | Ankhd1        | ENSMUSG00000024483 | Transcript        | ENSMUST00000155329 | protein_coding           | rs31793384  |
| 18:36679731-36679731 | upstream_gene_variant                 | MODIFIER | Sra1          | ENSMUSG00000006050 | Transcript        | ENSMUST00000001415 | protein_coding           | rs30101280  |
| 18:36679731-36679731 | intron variant                        | MODIFIER | Slc35a4       | ENSMUSG00000033272 | Transcript        | ENSMUST00000036158 | protein_coding           | rs30101280  |
| 18:36679731-36679731 | intron variant                        | MODIFIER | Slc35a4       | ENSMUSG00000033272 | Transcript        | ENSMUST00000050476 | protein_coding           | rs30101280  |
| 18:36679731-36679731 | intron variant,non coding trans       | MODIFIER | Slc35a4       | ENSMUSG00000033272 | Transcript        | ENSMUST00000168343 | processed_transcript     | rs30101280  |
| 18:36679731-36679731 | intron_variant,non coding trans       | MODIFIER | Slc35a4       | ENSMUSG00000033272 | Transcript        | ENSMUST00000170288 | processed_transcript     | rs30101280  |
| 18:36679731-36679731 | intron_variant                        | MODIFIER | Slc35a4       | ENSMUSG00000033272 | Transcript        | ENSMUST00000185899 | protein_coding           | rs30101280  |
| 18:36679731-36679731 | intron_variant                        | MODIFIER | Slc35a4       | ENSMUSG00000033272 | Transcript        | ENSMUST00000186538 | protein_coding           | rs30101280  |
| 18:36679731-36679731 | regulatory region variant             | MODIFIER | -             | -                  | RegulatoryFeature | ENSMUSR00000133085 | promoter                 | rs30101280  |
| 18:36747459-36747459 | intron variant                        | MODIFIER | lk            | ENSMUSG00000024474 | Transcript        | ENSMUST00000007042 | protein_coding           | rs31789898  |
| 18:36747459-36747459 | upstream gene variant                 | MODIFIER | Ndufa2        | ENSMUSG00000014294 | Transcript        | ENSMUST00000014438 | protein_coding           | rs31789898  |
| 18:36747459-36747459 | intron variant,non coding trans       | MODIFIER | lk            | ENSMUSG00000024474 | Transcript        | ENSMUST00000224284 | processed_transcript     | rs31789898  |
| 18:36767035-36767035 | intron_variant                        | MODIFIER | Hars          | ENSMUSG00000001380 | Transcript        | ENSMUST00000001416 | protein_coding           | rs31790950  |
| 18:36767035-36767035 | downstream_gene_variant               | MODIFIER | Wdr55         | ENSMUSG00000042660 | Transcript        | ENSMUST00000049323 | protein_coding           | rs31790950  |
| 18:36767035-36767035 | upstream_gene_variant                 | MODIFIER | Dnd1          | ENSMUSG00000044595 | Transcript        | ENSMUST00000061522 | protein_coding           | rs31790950  |

|                      |                                   |          |          |                     |                   |                     |                         |             |
|----------------------|-----------------------------------|----------|----------|---------------------|-------------------|---------------------|-------------------------|-------------|
| 18:36767035-36767035 | upstream gene variant             | MODIFIER | Dnd1     | ENSMUSG00000044595  | Transcript        | ENSMUST00000124038  | retained intron         | rs31790950  |
| 18:36767035-36767035 | upstream_gene_variant             | MODIFIER | Dnd1     | ENSMUSG00000044595  | Transcript        | ENSMUST00000155827  | retained_intron         | rs31790950  |
| 18:37846857-37846857 | downstream gene variant           | MODIFIER | Pcdhgb6  | ENSMUSG00000103088  | Transcript        | ENSMUST00000003599  | protein_coding          | rs31758919  |
| 18:37846857-37846857 | intron variant                    | MODIFIER | Diaph1   | ENSMUSG00000024456  | Transcript        | ENSMUST00000025337  | protein_coding          | rs31758919  |
| 18:37846857-37846857 | downstream gene variant           | MODIFIER | Pcdhga12 | ENSMUSG00000102428  | Transcript        | ENSMUST00000044851  | protein_coding          | rs31758919  |
| 18:37846857-37846857 | downstream gene variant           | MODIFIER | Pcdhgc5  | ENSMUSG00000102543  | Transcript        | ENSMUST000000055935 | protein_coding          | rs31758919  |
| 18:37846857-37846857 | downstream gene variant           | MODIFIER | Pcdhga11 | ENSMUSG00000102742  | Transcript        | ENSMUST000000061279 | protein_coding          | rs31758919  |
| 18:37846857-37846857 | downstream_gene_variant           | MODIFIER | Pcdhgc4  | ENSMUSG00000023036  | Transcript        | ENSMUST000000066140 | protein_coding          | rs31758919  |
| 18:37846857-37846857 | downstream_gene_variant           | MODIFIER | Pcdhga8  | ENSMUSG00000103897  | Transcript        | ENSMUST000000066149 | protein_coding          | rs31758919  |
| 18:37846857-37846857 | downstream_gene_variant           | MODIFIER | Pcdhga3  | ENSMUSG00000104346  | Transcript        | ENSMUST000000073447 | protein_coding          | rs31758919  |
| 18:37846857-37846857 | downstream gene variant           | MODIFIER | Pcdhgc3  | ENSMUSG00000102918  | Transcript        | ENSMUST000000076807 | protein_coding          | rs31758919  |
| 18:37846857-37846857 | intron variant                    | MODIFIER | Diaph1   | ENSMUSG00000024456  | Transcript        | ENSMUST000000080033 | protein_coding          | rs31758919  |
| 18:37846857-37846857 | downstream gene variant           | MODIFIER | Pcdhga9  | ENSMUSG00000102440  | Transcript        | ENSMUST000000091935 | protein_coding          | rs31758919  |
| 18:37846857-37846857 | intron variant                    | MODIFIER | Diaph1   | ENSMUSG00000024456  | Transcript        | ENSMUST00000115629  | protein_coding          | rs31758919  |
| 18:37846857-37846857 | intron variant                    | MODIFIER | Diaph1   | ENSMUSG00000024456  | Transcript        | ENSMUST00000115631  | protein_coding          | rs31758919  |
| 18:37846857-37846857 | intron variant                    | MODIFIER | Diaph1   | ENSMUSG00000024456  | Transcript        | ENSMUST00000115634  | protein_coding          | rs31758919  |
| 18:37846857-37846857 | intron_variant,non_coding_trans   | MODIFIER | Diaph1   | ENSMUSG00000024456  | Transcript        | ENSMUST00000127346  | processed_transcript    | rs31758919  |
| 18:37846857-37846857 | downstream gene variant           | MODIFIER | Pcdhgc3  | ENSMUSG00000102918  | Transcript        | ENSMUST00000192103  | nonsense mediated decay | rs31758919  |
| 18:37846857-37846857 | downstream gene variant           | MODIFIER | Pcdhga7  | ENSMUSG00000103472  | Transcript        | ENSMUST00000192511  | protein_coding          | rs31758919  |
| 18:37846857-37846857 | downstream gene variant           | MODIFIER | Pcdhqb5  | ENSMUSG00000103749  | Transcript        | ENSMUST00000192535  | protein_coding          | rs31758919  |
| 18:37846857-37846857 | downstream_gene_variant           | MODIFIER | Pcdhgb1  | ENSMUSG00000103037  | Transcript        | ENSMUST00000192931  | protein_coding          | rs31758919  |
| 18:37846857-37846857 | downstream_gene_variant           | MODIFIER | Pcdhga10 | ENSMUSG00000102222  | Transcript        | ENSMUST00000193404  | protein_coding          | rs31758919  |
| 18:37846857-37846857 | downstream_gene_variant           | MODIFIER | Pcdhga5  | ENSMUSG00000103567  | Transcript        | ENSMUST00000193414  | protein_coding          | rs31758919  |
| 18:37846857-37846857 | downstream gene variant           | MODIFIER | Pcdhga2  | ENSMUSG00000103332  | Transcript        | ENSMUST00000193869  | protein_coding          | rs31758919  |
| 18:37846857-37846857 | downstream gene variant           | MODIFIER | Pcdhga1  | ENSMUSG00000103144  | Transcript        | ENSMUST00000194190  | protein_coding          | rs31758919  |
| 18:37846857-37846857 | downstream gene variant           | MODIFIER | Pcdhga4  | ENSMUSG00000103677  | Transcript        | ENSMUST00000194418  | protein_coding          | rs31758919  |
| 18:37846857-37846857 | downstream gene variant           | MODIFIER | Pcdhqb7  | ENSMUSG00000104063  | Transcript        | ENSMUST00000194928  | protein_coding          | rs31758919  |
| 18:37846857-37846857 | downstream_gene_variant           | MODIFIER | Pcdhgb2  | ENSMUSG00000102748  | Transcript        | ENSMUST00000195112  | protein_coding          | rs31758919  |
| 18:37846857-37846857 | downstream_gene_variant           | MODIFIER | Pcdhgc4  | ENSMUSG00000023036  | Transcript        | ENSMUST00000195239  | protein_coding          | rs31758919  |
| 18:37846857-37846857 | downstream_gene_variant           | MODIFIER | Pcdhgb4  | ENSMUSG00000103585  | Transcript        | ENSMUST00000195363  | protein_coding          | rs31758919  |
| 18:37846857-37846857 | downstream gene variant           | MODIFIER | Pcdhqb8  | ENSMUSG00000103081  | Transcript        | ENSMUST00000195764  | polymorphic pseudogene  | rs31758919  |
| 18:37846857-37846857 | downstream gene variant           | MODIFIER | Pcdhga6  | ENSMUSG00000103793  | Transcript        | ENSMUST00000195823  | protein_coding          | rs31758919  |
| 18:37846996-37846996 | intron variant                    | MODIFIER | Diaph1   | ENSMUSG00000024456  | Transcript        | ENSMUST00000025337  | protein_coding          | rs52158212  |
| 18:37846996-37846996 | intron variant                    | MODIFIER | Diaph1   | ENSMUSG00000024456  | Transcript        | ENSMUST00000080033  | protein_coding          | rs52158212  |
| 18:37846996-37846996 | intron variant                    | MODIFIER | Diaph1   | ENSMUSG00000024456  | Transcript        | ENSMUST00000115629  | protein_coding          | rs52158212  |
| 18:37846996-37846996 | intron variant                    | MODIFIER | Diaph1   | ENSMUSG00000024456  | Transcript        | ENSMUST00000115631  | protein_coding          | rs52158212  |
| 18:37846996-37846996 | intron variant                    | MODIFIER | Diaph1   | ENSMUSG00000024456  | Transcript        | ENSMUST00000115634  | protein_coding          | rs52158212  |
| 18:37846996-37846996 | intron variant,non_coding_trans   | MODIFIER | Diaph1   | ENSMUSG00000024456  | Transcript        | ENSMUST00000127346  | processed_transcript    | rs52158212  |
| 18:37851507-37851508 | intron variant                    | MODIFIER | Diaph1   | ENSMUSG00000024456  | Transcript        | ENSMUST00000025337  | protein_coding          | rs225434146 |
| 18:37851507-37851508 | intron variant                    | MODIFIER | Diaph1   | ENSMUSG00000024456  | Transcript        | ENSMUST00000080033  | protein_coding          | rs225434146 |
| 18:37851507-37851508 | intron variant                    | MODIFIER | Diaph1   | ENSMUSG00000024456  | Transcript        | ENSMUST00000115629  | protein_coding          | rs225434146 |
| 18:37851507-37851508 | intron variant                    | MODIFIER | Diaph1   | ENSMUSG00000024456  | Transcript        | ENSMUST00000115631  | protein_coding          | rs225434146 |
| 18:37851507-37851508 | intron variant                    | MODIFIER | Diaph1   | ENSMUSG00000024456  | Transcript        | ENSMUST00000115634  | protein_coding          | rs225434146 |
| 18:37851507-37851508 | downstream gene variant           | MODIFIER | Diaph1   | ENSMUSG00000024456  | Transcript        | ENSMUST00000124822  | retained intron         | rs225434146 |
| 18:37851507-37851508 | intron variant,non_coding_trans   | MODIFIER | Diaph1   | ENSMUSG00000024456  | Transcript        | ENSMUST00000127346  | processed_transcript    | rs225434146 |
| 18:37851507-37851508 | downstream gene variant           | MODIFIER | Mir6979  | ENSMUSG00000098706  | Transcript        | ENSMUST00000183927  | miRNA                   | rs225434146 |
| 18:37854141-37854141 | intron variant                    | MODIFIER | Diaph1   | ENSMUSG00000024456  | Transcript        | ENSMUST00000025337  | protein_coding          | rs31758037  |
| 18:37854141-37854141 | intron variant                    | MODIFIER | Diaph1   | ENSMUSG00000024456  | Transcript        | ENSMUST00000080033  | protein_coding          | rs31758037  |
| 18:37854141-37854141 | intron variant                    | MODIFIER | Diaph1   | ENSMUSG00000024456  | Transcript        | ENSMUST00000115629  | protein_coding          | rs31758037  |
| 18:37854141-37854141 | intron variant                    | MODIFIER | Diaph1   | ENSMUSG00000024456  | Transcript        | ENSMUST00000115631  | protein_coding          | rs31758037  |
| 18:37854141-37854141 | intron variant                    | MODIFIER | Diaph1   | ENSMUSG00000024456  | Transcript        | ENSMUST00000115634  | protein_coding          | rs31758037  |
| 18:37854141-37854141 | downstream gene variant           | MODIFIER | Diaph1   | ENSMUSG00000024456  | Transcript        | ENSMUST00000124822  | retained intron         | rs31758037  |
| 18:37854141-37854141 | upstream gene variant             | MODIFIER | Diaph1   | ENSMUSG00000024456  | Transcript        | ENSMUST00000127346  | processed_transcript    | rs31758037  |
| 18:37854141-37854141 | downstream_gene_variant           | MODIFIER | Mir6979  | ENSMUSG00000098706  | Transcript        | ENSMUST00000183927  | miRNA                   | rs31758037  |
| 18:37974779-37974779 | intron variant                    | MODIFIER | Arap3    | ENSMUSG00000024451  | Transcript        | ENSMUST00000042944  | protein_coding          | rs229222587 |
| 18:37974779-37974779 | upstream_gene_variant             | MODIFIER | Mir6981  | ENSMUSG00000098608  | Transcript        | ENSMUST00000184293  | miRNA                   | rs229222587 |
| 18:37990624-37990624 | splice region variant,intron vari | LOW      | Arap3    | ENSMUSG00000024451  | Transcript        | ENSMUST00000042944  | protein_coding          | rs233848426 |
| 18:37990624-37990624 | downstream gene variant           | MODIFIER | Mir6980  | ENSMUSG00000098297  | Transcript        | ENSMUST00000185063  | miRNA                   | rs233848426 |
| 18:38259100-38259100 | intron variant                    | MODIFIER | Dele1    | ENSMUSG00000024442  | Transcript        | ENSMUST00000025314  | protein_coding          | rs31742830  |
| 18:38259241-38259241 | intron variant                    | MODIFIER | Dele1    | ENSMUSG00000024442  | Transcript        | ENSMUST00000025314  | protein_coding          | rs31742827  |
| 18:38260773-38260773 | intron variant                    | MODIFIER | Dele1    | ENSMUSG00000024442  | Transcript        | ENSMUST00000025314  | protein_coding          | rs51623195  |
| 18:38307632-38307632 | intron variant                    | MODIFIER | Rnf14    | ENSMUSG000000060450 | Transcript        | ENSMUST000000072376 | protein_coding          | rs237256251 |
| 18:38307632-38307632 | intron variant                    | MODIFIER | Rnf14    | ENSMUSG000000060450 | Transcript        | ENSMUST00000170811  | protein_coding          | rs237256251 |
| 18:38307632-38307632 | intron variant                    | MODIFIER | Rnf14    | ENSMUSG000000060450 | Transcript        | ENSMUST00000171461  | protein_coding          | rs237256251 |
| 18:38307632-38307632 | regulatory region variant         | MODIFIER | -        | -                   | RegulatoryFeature | ENSMUSFR00000605253 | enhancer                | rs237256251 |
| 18:38318748-38318748 | downstream gene variant           | MODIFIER | Rnf14    | ENSMUSG000000060450 | Transcript        | ENSMUST00000072376  | protein_coding          | rs263376449 |
| 18:38318748-38318748 | downstream_gene_variant           | MODIFIER | Rnf14    | ENSMUSG000000060450 | Transcript        | ENSMUST00000170811  | protein_coding          | rs263376449 |
| 18:38318748-38318748 | downstream_gene_variant           | MODIFIER | Rnf14    | ENSMUSG000000060450 | Transcript        | ENSMUST00000171461  | protein_coding          | rs263376449 |
| 18:38318782-38318782 | downstream_gene_variant           | MODIFIER | Rnf14    | ENSMUSG000000060450 | Transcript        | ENSMUST00000072376  | protein_coding          | rs237486057 |



|                      |                                 |          |               |                    |                   |                     |                         |             |
|----------------------|---------------------------------|----------|---------------|--------------------|-------------------|---------------------|-------------------------|-------------|
| 18:38318782-38318782 | downstream gene variant         | MODIFIER | Rnf14         | ENSMUSG00000060450 | Transcript        | ENSMUST00000170811  | protein coding          | rs237486057 |
| 18:38318782-38318782 | downstream_gene_variant         | MODIFIER | Rnf14         | ENSMUSG00000060450 | Transcript        | ENSMUST00000171461  | protein_coding          | rs237486057 |
| 18:38331776-38331776 | intron_variant                  | MODIFIER | Gnpda1        | ENSMUSG00000052102 | Transcript        | ENSMUST00000063814  | protein_coding          | rs257077529 |
| 18:38331776-38331776 | downstream_gene_variant         | MODIFIER | Gnpda1        | ENSMUSG00000052102 | Transcript        | ENSMUST00000129062  | retained_intron         | rs257077529 |
| 18:38331776-38331776 | downstream gene variant         | MODIFIER | Gnpda1        | ENSMUSG00000052102 | Transcript        | ENSMUST00000139885  | protein_coding          | rs257077529 |
| 18:38331776-38331776 | intron variant,non coding trans | MODIFIER | Gnpda1        | ENSMUSG00000052102 | Transcript        | ENSMUST00000153291  | processed transcript    | rs257077529 |
| 18:38332792-38332792 | intron variant                  | MODIFIER | Gnpda1        | ENSMUSG00000052102 | Transcript        | ENSMUST00000063814  | protein_coding          | rs245526608 |
| 18:38332792-38332792 | downstream_gene_variant         | MODIFIER | Gnpda1        | ENSMUSG00000052102 | Transcript        | ENSMUST00000129062  | retained_intron         | rs245526608 |
| 18:38332792-38332792 | downstream_gene_variant         | MODIFIER | Gnpda1        | ENSMUSG00000052102 | Transcript        | ENSMUST00000139885  | protein_coding          | rs245526608 |
| 18:38332792-38332792 | upstream_gene_variant           | MODIFIER | Gnpda1        | ENSMUSG00000052102 | Transcript        | ENSMUST00000153291  | processed_transcript    | rs245526608 |
| 18:38332795-38332795 | intron variant                  | MODIFIER | Gnpda1        | ENSMUSG00000052102 | Transcript        | ENSMUST00000063814  | protein_coding          | rs31733638  |
| 18:38332795-38332795 | downstream gene variant         | MODIFIER | Gnpda1        | ENSMUSG00000052102 | Transcript        | ENSMUST00000129062  | retained_intron         | rs31733638  |
| 18:38332795-38332795 | downstream gene variant         | MODIFIER | Gnpda1        | ENSMUSG00000052102 | Transcript        | ENSMUST00000139885  | protein_coding          | rs31733638  |
| 18:38332795-38332795 | upstream gene variant           | MODIFIER | Gnpda1        | ENSMUSG00000052102 | Transcript        | ENSMUST00000153291  | processed transcript    | rs31733638  |
| 18:38334603-38334603 | intron_variant                  | MODIFIER | Gnpda1        | ENSMUSG00000052102 | Transcript        | ENSMUST00000063814  | protein_coding          | rs247265927 |
| 18:38334603-38334603 | intron_variant,non coding_trans | MODIFIER | Gnpda1        | ENSMUSG00000052102 | Transcript        | ENSMUST00000129062  | retained_intron         | rs247265927 |
| 18:38334603-38334603 | intron_variant                  | MODIFIER | Gnpda1        | ENSMUSG00000052102 | Transcript        | ENSMUST00000139885  | protein_coding          | rs247265927 |
| 18:38334603-38334603 | upstream gene variant           | MODIFIER | Gnpda1        | ENSMUSG00000052102 | Transcript        | ENSMUST00000153291  | processed transcript    | rs247265927 |
| 18:38334608-38334608 | intron variant                  | MODIFIER | Gnpda1        | ENSMUSG00000052102 | Transcript        | ENSMUST00000063814  | protein_coding          | rs31741649  |
| 18:38334608-38334608 | intron variant,non coding trans | MODIFIER | Gnpda1        | ENSMUSG00000052102 | Transcript        | ENSMUST00000129062  | retained_intron         | rs31741649  |
| 18:38334608-38334608 | intron_variant                  | MODIFIER | Gnpda1        | ENSMUSG00000052102 | Transcript        | ENSMUST00000139885  | protein_coding          | rs31741649  |
| 18:38334608-38334608 | upstream_gene_variant           | MODIFIER | Gnpda1        | ENSMUSG00000052102 | Transcript        | ENSMUST00000153291  | processed_transcript    | rs31741649  |
| 18:38336113-38336113 | intron_variant                  | MODIFIER | Gnpda1        | ENSMUSG00000052102 | Transcript        | ENSMUST00000063814  | protein_coding          | rs31740089  |
| 18:38336113-38336113 | upstream gene variant           | MODIFIER | Gnpda1        | ENSMUSG00000052102 | Transcript        | ENSMUST00000129062  | retained_intron         | rs31740089  |
| 18:38336113-38336113 | intron variant                  | MODIFIER | Gnpda1        | ENSMUSG00000052102 | Transcript        | ENSMUST00000139885  | protein_coding          | rs31740089  |
| 18:38336113-38336113 | upstream gene variant           | MODIFIER | Gnpda1        | ENSMUSG00000052102 | Transcript        | ENSMUST00000153291  | processed transcript    | rs31740089  |
| 18:38359699-38359699 | downstream gene variant         | MODIFIER | Gm24690       | ENSMUSG00000088384 | Transcript        | ENSMUST00000157759  | rRNA                    | rs231957407 |
| 18:38359706-38359706 | downstream_gene_variant         | MODIFIER | Gm24690       | ENSMUSG00000088384 | Transcript        | ENSMUST00000157759  | rRNA                    | rs242104995 |
| 18:38449000-38449000 | intron_variant                  | MODIFIER | Ndfip1        | ENSMUSG00000024425 | Transcript        | ENSMUST00000025293  | protein_coding          | rs263737500 |
| 18:38449005-38449005 | intron_variant                  | MODIFIER | Ndfip1        | ENSMUSG00000024425 | Transcript        | ENSMUST00000025293  | protein_coding          | rs226631525 |
| 18:38450570-38450570 | intron variant                  | MODIFIER | Ndfip1        | ENSMUSG00000024425 | Transcript        | ENSMUST00000025293  | protein_coding          | rs264083262 |
| 18:38451072-38451072 | intron variant                  | MODIFIER | Ndfip1        | ENSMUSG00000024425 | Transcript        | ENSMUST00000025293  | protein_coding          | rs50128826  |
| 18:38460474-38460474 | intron variant                  | MODIFIER | Ndfip1        | ENSMUSG00000024425 | Transcript        | ENSMUST00000025293  | protein_coding          | rs224678089 |
| 18:38461008-38461008 | intron_variant                  | MODIFIER | Ndfip1        | ENSMUSG00000024425 | Transcript        | ENSMUST00000025293  | protein_coding          | rs31730914  |
| 18:39357853-39357853 | intron_variant                  | MODIFIER | Arhgap26      | ENSMUSG00000036452 | Transcript        | ENSMUST00000097593  | protein_coding          | rs46012708  |
| 18:39357853-39357853 | upstream_gene_variant           | MODIFIER | Arhgap26      | ENSMUSG00000036452 | Transcript        | ENSMUST00000133247  | processed_transcript    | rs46012708  |
| 18:39357853-39357853 | intron variant                  | MODIFIER | Arhgap26      | ENSMUSG00000036452 | Transcript        | ENSMUST00000137497  | protein_coding          | rs46012708  |
| 18:39357853-39357853 | intron variant                  | MODIFIER | Arhgap26      | ENSMUSG00000036452 | Transcript        | ENSMUST00000141058  | protein_coding          | rs46012708  |
| 18:39357853-39357853 | intron variant,NMD transcript v | MODIFIER | Arhgap26      | ENSMUSG00000036452 | Transcript        | ENSMUST00000151757  | nonsense mediated decay | rs46012708  |
| 18:39357853-39357853 | intron variant                  | MODIFIER | Arhgap26      | ENSMUSG00000036452 | Transcript        | ENSMUST00000154551  | protein_coding          | rs46012708  |
| 18:39357853-39357853 | intron_variant                  | MODIFIER | Arhgap26      | ENSMUSG00000036452 | Transcript        | ENSMUST00000155576  | protein_coding          | rs46012708  |
| 18:39357853-39357853 | regulatory_region_variant       | MODIFIER | -             | -                  | RegulatoryFeature | ENSMUSR000000605428 | enhancer                | rs46012708  |
| 18:50057718-50057718 | intron_variant                  | MODIFIER | Tnfaip8       | ENSMUSG00000062210 | Transcript        | ENSMUST00000126666  | protein_coding          | rs32092848  |
| 18:50057718-50057718 | intron variant                  | MODIFIER | Tnfaip8       | ENSMUSG00000062210 | Transcript        | ENSMUST00000128377  | protein_coding          | rs32092848  |
| 18:50057718-50057718 | upstream gene variant           | MODIFIER | C030005K06Rik | ENSMUSG00000086600 | Transcript        | ENSMUST00000129164  | processed transcript    | rs32092848  |
| 18:50057718-50057718 | intron variant                  | MODIFIER | Tnfaip8       | ENSMUSG00000062210 | Transcript        | ENSMUST00000134348  | protein_coding          | rs32092848  |
| 18:50057718-50057718 | intron_variant                  | MODIFIER | Tnfaip8       | ENSMUSG00000062210 | Transcript        | ENSMUST00000145726  | protein_coding          | rs32092848  |
| 18:50057718-50057718 | upstream_gene_variant           | MODIFIER | C030005K06Rik | ENSMUSG00000086600 | Transcript        | ENSMUST00000147073  | processed_transcript    | rs32092848  |
| 18:50057718-50057718 | intron_variant                  | MODIFIER | Tnfaip8       | ENSMUSG00000062210 | Transcript        | ENSMUST00000148159  | protein_coding          | rs32092848  |
| 18:50057718-50057718 | intron variant                  | MODIFIER | Tnfaip8       | ENSMUSG00000062210 | Transcript        | ENSMUST00000148989  | protein_coding          | rs32092848  |
| 18:50057718-50057718 | upstream gene variant           | MODIFIER | C030005K06Rik | ENSMUSG00000086600 | Transcript        | ENSMUST00000151719  | processed transcript    | rs32092848  |
| 18:50057718-50057718 | upstream gene variant           | MODIFIER | C030005K06Rik | ENSMUSG00000086600 | Transcript        | ENSMUST00000153361  | processed transcript    | rs32092848  |
| 18:50057718-50057718 | intron variant,non coding trans | MODIFIER | Tnfaip8       | ENSMUSG00000062210 | Transcript        | ENSMUST00000153545  | processed transcript    | rs32092848  |
| 18:50057718-50057718 | intron_variant                  | MODIFIER | Tnfaip8       | ENSMUSG00000062210 | Transcript        | ENSMUST00000153873  | protein_coding          | rs32092848  |
| 18:50057718-50057718 | downstream_gene_variant         | MODIFIER | Tnfaip8       | ENSMUSG00000062210 | Transcript        | ENSMUST00000155403  | retained_intron         | rs32092848  |
| 18:50057718-50057718 | intron_variant                  | MODIFIER | Tnfaip8       | ENSMUSG00000062210 | Transcript        | ENSMUST00000179937  | protein_coding          | rs32092848  |
| 18:50058271-50058271 | intron variant                  | MODIFIER | Tnfaip8       | ENSMUSG00000062210 | Transcript        | ENSMUST00000126666  | protein_coding          | rs32091880  |
| 18:50058271-50058271 | intron variant                  | MODIFIER | Tnfaip8       | ENSMUSG00000062210 | Transcript        | ENSMUST00000128377  | protein_coding          | rs32091880  |
| 18:50058271-50058271 | upstream gene variant           | MODIFIER | C030005K06Rik | ENSMUSG00000086600 | Transcript        | ENSMUST00000129164  | processed transcript    | rs32091880  |
| 18:50058271-50058271 | intron_variant                  | MODIFIER | Tnfaip8       | ENSMUSG00000062210 | Transcript        | ENSMUST00000134348  | protein_coding          | rs32091880  |
| 18:50058271-50058271 | intron_variant                  | MODIFIER | Tnfaip8       | ENSMUSG00000062210 | Transcript        | ENSMUST00000145726  | protein_coding          | rs32091880  |
| 18:50058271-50058271 | upstream_gene_variant           | MODIFIER | C030005K06Rik | ENSMUSG00000086600 | Transcript        | ENSMUST00000147073  | processed_transcript    | rs32091880  |
| 18:50058271-50058271 | intron variant                  | MODIFIER | Tnfaip8       | ENSMUSG00000062210 | Transcript        | ENSMUST00000148159  | protein_coding          | rs32091880  |
| 18:50058271-50058271 | intron variant                  | MODIFIER | Tnfaip8       | ENSMUSG00000062210 | Transcript        | ENSMUST00000148989  | protein_coding          | rs32091880  |
| 18:50058271-50058271 | upstream gene variant           | MODIFIER | C030005K06Rik | ENSMUSG00000086600 | Transcript        | ENSMUST00000151719  | processed transcript    | rs32091880  |
| 18:50058271-50058271 | upstream gene variant           | MODIFIER | C030005K06Rik | ENSMUSG00000086600 | Transcript        | ENSMUST00000153361  | processed transcript    | rs32091880  |
| 18:50058271-50058271 | intron_variant,non coding_trans | MODIFIER | Tnfaip8       | ENSMUSG00000062210 | Transcript        | ENSMUST00000153545  | processed transcript    | rs32091880  |
| 18:50058271-50058271 | intron_variant                  | MODIFIER | Tnfaip8       | ENSMUSG00000062210 | Transcript        | ENSMUST00000153873  | protein_coding          | rs32091880  |
| 18:50058271-50058271 | downstream_gene_variant         | MODIFIER | Tnfaip8       | ENSMUSG00000062210 | Transcript        | ENSMUST00000155403  | retained_intron         | rs32091880  |

|                      |                                 |          |               |                    |                   |                    |                          |             |
|----------------------|---------------------------------|----------|---------------|--------------------|-------------------|--------------------|--------------------------|-------------|
| 18:50058271-50058271 | intron variant                  | MODIFIER | Tnfai8        | ENSMUSG00000062210 | Transcript        | ENSMUST00000179937 | protein coding           | rs32091880  |
| 18:50058271-50058271 | regulatory_region_variant       | MODIFIER | -             | -                  | RegulatoryFeature | ENSMUR00000060413  | enhancer                 | rs32091880  |
| 18:50063188-50063188 | intron_variant                  | MODIFIER | Tnfai8        | ENSMUSG00000062210 | Transcript        | ENSMUST00000126666 | protein_coding           | rs32092639  |
| 18:50063188-50063188 | intron_variant                  | MODIFIER | Tnfai8        | ENSMUSG00000062210 | Transcript        | ENSMUST00000128377 | protein_coding           | rs32092639  |
| 18:50063188-50063188 | intron variant                  | MODIFIER | Tnfai8        | ENSMUSG00000062210 | Transcript        | ENSMUST00000134348 | protein_coding           | rs32092639  |
| 18:50063188-50063188 | intron variant                  | MODIFIER | Tnfai8        | ENSMUSG00000062210 | Transcript        | ENSMUST00000145726 | protein_coding           | rs32092639  |
| 18:50063188-50063188 | intron variant                  | MODIFIER | Tnfai8        | ENSMUSG00000062210 | Transcript        | ENSMUST00000148159 | protein_coding           | rs32092639  |
| 18:50063188-50063188 | intron_variant                  | MODIFIER | Tnfai8        | ENSMUSG00000062210 | Transcript        | ENSMUST00000148989 | protein_coding           | rs32092639  |
| 18:50063188-50063188 | intron_variant,non_coding_trans | MODIFIER | Tnfai8        | ENSMUSG00000062210 | Transcript        | ENSMUST00000153545 | processed_transcript     | rs32092639  |
| 18:50063188-50063188 | intron_variant                  | MODIFIER | Tnfai8        | ENSMUSG00000062210 | Transcript        | ENSMUST00000153873 | protein_coding           | rs32092639  |
| 18:50063188-50063188 | intron variant                  | MODIFIER | Tnfai8        | ENSMUSG00000062210 | Transcript        | ENSMUST00000179937 | protein_coding           | rs32092639  |
| 18:50063188-50063188 | regulatory_region_variant       | MODIFIER | -             | -                  | RegulatoryFeature | ENSMUSR00000134559 | promoter flanking region | rs32092639  |
| 18:50063216-50063216 | intron variant                  | MODIFIER | Tnfai8        | ENSMUSG00000062210 | Transcript        | ENSMUST00000126666 | protein_coding           | rs32092637  |
| 18:50063216-50063216 | intron variant                  | MODIFIER | Tnfai8        | ENSMUSG00000062210 | Transcript        | ENSMUST00000128377 | protein_coding           | rs32092637  |
| 18:50063216-50063216 | intron_variant                  | MODIFIER | Tnfai8        | ENSMUSG00000062210 | Transcript        | ENSMUST00000134348 | protein_coding           | rs32092637  |
| 18:50063216-50063216 | intron_variant                  | MODIFIER | Tnfai8        | ENSMUSG00000062210 | Transcript        | ENSMUST00000145726 | protein_coding           | rs32092637  |
| 18:50063216-50063216 | intron_variant                  | MODIFIER | Tnfai8        | ENSMUSG00000062210 | Transcript        | ENSMUST00000148159 | protein_coding           | rs32092637  |
| 18:50063216-50063216 | intron variant                  | MODIFIER | Tnfai8        | ENSMUSG00000062210 | Transcript        | ENSMUST00000148989 | protein_coding           | rs32092637  |
| 18:50063216-50063216 | intron variant,non_coding_trans | MODIFIER | Tnfai8        | ENSMUSG00000062210 | Transcript        | ENSMUST00000153545 | processed_transcript     | rs32092637  |
| 18:50063216-50063216 | intron variant                  | MODIFIER | Tnfai8        | ENSMUSG00000062210 | Transcript        | ENSMUST00000153873 | protein_coding           | rs32092637  |
| 18:50063216-50063216 | intron_variant                  | MODIFIER | Tnfai8        | ENSMUSG00000062210 | Transcript        | ENSMUST00000179937 | protein_coding           | rs32092637  |
| 18:50063216-50063216 | regulatory_region_variant       | MODIFIER | -             | -                  | RegulatoryFeature | ENSMUSR00000134559 | promoter flanking region | rs32092637  |
| 18:50067473-50067473 | intron_variant                  | MODIFIER | Tnfai8        | ENSMUSG00000062210 | Transcript        | ENSMUST00000126666 | protein_coding           | rs50596137  |
| 18:50067473-50067473 | intron variant                  | MODIFIER | Tnfai8        | ENSMUSG00000062210 | Transcript        | ENSMUST00000128377 | protein_coding           | rs50596137  |
| 18:50067473-50067473 | intron variant                  | MODIFIER | Tnfai8        | ENSMUSG00000062210 | Transcript        | ENSMUST00000134348 | protein_coding           | rs50596137  |
| 18:50067473-50067473 | intron variant                  | MODIFIER | Tnfai8        | ENSMUSG00000062210 | Transcript        | ENSMUST00000145726 | protein_coding           | rs50596137  |
| 18:50067473-50067473 | intron variant                  | MODIFIER | Tnfai8        | ENSMUSG00000062210 | Transcript        | ENSMUST00000148159 | protein_coding           | rs50596137  |
| 18:50067473-50067473 | intron_variant,non_coding_trans | MODIFIER | Tnfai8        | ENSMUSG00000062210 | Transcript        | ENSMUST00000148989 | protein_coding           | rs50596137  |
| 18:50067473-50067473 | intron variant                  | MODIFIER | Tnfai8        | ENSMUSG00000062210 | Transcript        | ENSMUST00000153545 | processed_transcript     | rs50596137  |
| 18:50067473-50067473 | intron variant                  | MODIFIER | Tnfai8        | ENSMUSG00000062210 | Transcript        | ENSMUST00000153873 | protein_coding           | rs50596137  |
| 18:50067473-50067473 | intron variant                  | MODIFIER | Tnfai8        | ENSMUSG00000062210 | Transcript        | ENSMUST00000179937 | protein_coding           | rs50596137  |
| 18:50067474-50067474 | intron variant                  | MODIFIER | Tnfai8        | ENSMUSG00000062210 | Transcript        | ENSMUST00000126666 | protein_coding           | rs49144351  |
| 18:50067474-50067474 | intron variant                  | MODIFIER | Tnfai8        | ENSMUSG00000062210 | Transcript        | ENSMUST00000128377 | protein_coding           | rs49144351  |
| 18:50067474-50067474 | intron_variant                  | MODIFIER | Tnfai8        | ENSMUSG00000062210 | Transcript        | ENSMUST00000134348 | protein_coding           | rs49144351  |
| 18:50067474-50067474 | intron_variant                  | MODIFIER | Tnfai8        | ENSMUSG00000062210 | Transcript        | ENSMUST00000145726 | protein_coding           | rs49144351  |
| 18:50067474-50067474 | intron_variant                  | MODIFIER | Tnfai8        | ENSMUSG00000062210 | Transcript        | ENSMUST00000148159 | protein_coding           | rs49144351  |
| 18:50067474-50067474 | intron variant                  | MODIFIER | Tnfai8        | ENSMUSG00000062210 | Transcript        | ENSMUST00000148989 | protein_coding           | rs49144351  |
| 18:50067474-50067474 | intron variant,non_coding_trans | MODIFIER | Tnfai8        | ENSMUSG00000062210 | Transcript        | ENSMUST00000153545 | processed_transcript     | rs49144351  |
| 18:50067474-50067474 | intron variant                  | MODIFIER | Tnfai8        | ENSMUSG00000062210 | Transcript        | ENSMUST00000153873 | protein_coding           | rs49144351  |
| 18:50067474-50067474 | intron variant                  | MODIFIER | Tnfai8        | ENSMUSG00000062210 | Transcript        | ENSMUST00000179937 | protein_coding           | rs49144351  |
| 18:5063594-5063594   | missense_variant                | MODERATE | Svil          | ENSMUSG00000024236 | Transcript        | ENSMUST00000025079 | protein_coding           | rs107684718 |
| 18:5063594-5063594   | upstream_gene_variant           | MODIFIER | Svil          | ENSMUSG00000024236 | Transcript        | ENSMUST00000125512 | nonsense_mediated_decay  | rs107684718 |
| 18:5063594-5063594   | missense_variant                | MODERATE | Svil          | ENSMUSG00000024236 | Transcript        | ENSMUST00000126977 | protein_coding           | rs107684718 |
| 18:5063594-5063594   | missense variant                | MODERATE | Svil          | ENSMUSG00000024236 | Transcript        | ENSMUST00000127297 | protein_coding           | rs107684718 |
| 18:5063594-5063594   | missense variant,NMD transcript | MODERATE | Svil          | ENSMUSG00000024236 | Transcript        | ENSMUST00000131609 | nonsense mediated decay  | rs107684718 |
| 18:5063594-5063594   | missense variant                | MODERATE | Svil          | ENSMUSG00000024236 | Transcript        | ENSMUST00000140448 | protein_coding           | rs107684718 |
| 18:5063594-5063594   | missense_variant                | MODERATE | Svil          | ENSMUSG00000024236 | Transcript        | ENSMUST00000143254 | protein_coding           | rs107684718 |
| 18:5063594-5063594   | missense_variant                | MODERATE | Svil          | ENSMUSG00000024236 | Transcript        | ENSMUST00000210707 | protein_coding           | rs107684718 |
| 18:53383253-53383253 | intron_variant                  | MODIFIER | Snx24         | ENSMUSG00000024535 | Transcript        | ENSMUST00000025417 | protein_coding           | rs32106262  |
| 18:53383253-53383253 | intron variant                  | MODIFIER | Snx24         | ENSMUSG00000024535 | Transcript        | ENSMUST00000165032 | protein_coding           | rs32106262  |
| 18:53386456-53386456 | intron variant                  | MODIFIER | Snx24         | ENSMUSG00000024535 | Transcript        | ENSMUST00000025417 | protein_coding           | rs29676818  |
| 18:53386456-53386456 | intron variant                  | MODIFIER | Snx24         | ENSMUSG00000024535 | Transcript        | ENSMUST00000165032 | protein_coding           | rs29676818  |
| 18:53387902-53387902 | intron variant                  | MODIFIER | Snx24         | ENSMUSG00000024535 | Transcript        | ENSMUST00000025417 | protein_coding           | rs29562370  |
| 18:53387902-53387902 | intron_variant                  | MODIFIER | Snx24         | ENSMUSG00000024535 | Transcript        | ENSMUST00000165032 | protein_coding           | rs29562370  |
| 18:57384338-57384338 | intron_variant                  | MODIFIER | Prrc1         | ENSMUSG00000024594 | Transcript        | ENSMUST00000025490 | protein_coding           | rs29870199  |
| 18:57384338-57384338 | intron_variant,non_coding_trans | MODIFIER | 4930511M06Rik | ENSMUSG00000086607 | Transcript        | ENSMUST00000130696 | processed_transcript     | rs29870199  |
| 18:57384338-57384338 | regulatory_region_variant       | MODIFIER | -             | -                  | RegulatoryFeature | ENSMUSR00000607310 | open chromatin region    | rs29870199  |
| 18:57388230-57388230 | intron variant                  | MODIFIER | Prrc1         | ENSMUSG00000024594 | Transcript        | ENSMUST00000025490 | protein_coding           | rs29679547  |
| 18:57388230-57388230 | intron variant,non_coding_trans | MODIFIER | 4930511M06Rik | ENSMUSG00000086607 | Transcript        | ENSMUST00000130696 | processed_transcript     | rs29679547  |
| 18:57391477-57391477 | 3_prime_UTR_variant             | MODIFIER | Prrc1         | ENSMUSG00000024594 | Transcript        | ENSMUST00000025490 | protein_coding           | rs257071317 |
| 18:57391477-57391477 | intron_variant,non_coding_trans | MODIFIER | 4930511M06Rik | ENSMUSG00000086607 | Transcript        | ENSMUST00000130696 | processed_transcript     | rs257071317 |
| 18:60392083-60392083 | 3_prime_UTR_variant             | MODIFIER | liqp1         | ENSMUSG00000054072 | Transcript        | ENSMUST00000032473 | protein_coding           | rs387859917 |
| 18:60392083-60392083 | 3 prime UTR variant             | MODIFIER | liqp1         | ENSMUSG00000054072 | Transcript        | ENSMUST00000066912 | protein_coding           | rs387859917 |
| 18:60817338-60817338 | downstream gene variant         | MODIFIER | Cd74          | ENSMUSG00000024610 | Transcript        | ENSMUST00000050487 | protein_coding           | rs264897002 |
| 18:60817338-60817338 | downstream gene variant         | MODIFIER | Cd74          | ENSMUSG00000024610 | Transcript        | ENSMUST00000097563 | protein_coding           | rs264897002 |
| 18:60817338-60817338 | intron variant,NMD transcript   | MODIFIER | Tcof1         | ENSMUSG00000024613 | Transcript        | ENSMUST00000163446 | nonsense mediated decay  | rs264897002 |
| 18:60817338-60817338 | downstream_gene_variant         | MODIFIER | Cd74          | ENSMUSG00000024610 | Transcript        | ENSMUST00000167610 | protein_coding           | rs264897002 |
| 18:60817338-60817338 | intron_variant                  | MODIFIER | Tcof1         | ENSMUSG00000024613 | Transcript        | ENSMUST00000175934 | protein_coding           | rs264897002 |
| 18:60817338-60817338 | intron_variant                  | MODIFIER | Tcof1         | ENSMUSG00000024613 | Transcript        | ENSMUST00000176630 | protein_coding           | rs264897002 |

|                      |                                 |          |          |                     |                   |                     |                          |             |
|----------------------|---------------------------------|----------|----------|---------------------|-------------------|---------------------|--------------------------|-------------|
| 18:60817338-60817338 | downstream gene variant         | MODIFIER | Toof1    | ENSMUSG00000024613  | Transcript        | ENSMUST00000177172  | protein coding           | rs264897002 |
| 18:60918366-60918366 | 3_prime_UTR_variant             | MODIFIER | Arsi     | ENSMUSG00000036412  | Transcript        | ENSMUST00000040359  | protein coding           | rs29862747  |
| 18:60918366-60918366 | regulatory_region_variant       | MODIFIER | -        | -                   | RegulatoryFeature | ENSMUSR00000060735  | enhancer                 | rs29862747  |
| 18:61297721-61297721 | downstream_gene_variant         | MODIFIER | Ppargc1b | ENSMUSG00000033871  | Transcript        | ENSMUST00000063307  | protein coding           | rs29861794  |
| 18:61297721-61297721 | downstream gene variant         | MODIFIER | Ppargc1b | ENSMUSG00000033871  | Transcript        | ENSMUST00000075299  | protein coding           | rs29861794  |
| 18:61503254-61503254 | intron variant                  | MODIFIER | Arhgef37 | ENSMUSG00000045094  | Transcript        | ENSMUST00000171629  | protein coding           | -           |
| 18:6207128-6207128   | intron variant                  | MODIFIER | Kif5b    | ENSMUSG00000006740  | Transcript        | ENSMUST00000025083  | protein coding           | rs29723092  |
| 18:6207128-6207128   | intron_variant,non_coding_trans | MODIFIER | Kif5b    | ENSMUSG00000006740  | Transcript        | ENSMUST00000168031  | retained_intron          | rs29723092  |
| 18:62187348-62187348 | downstream_gene_variant         | MODIFIER | Gm9949   | ENSMUSG00000054589  | Transcript        | ENSMUST00000067743  | protein coding           | rs37559711  |
| 18:62187348-62187348 | regulatory_region_variant       | MODIFIER | -        | -                   | RegulatoryFeature | ENSMUSR000000377434 | promoter_flanking_region | rs37559711  |
| 18:62187841-62187841 | downstream gene variant         | MODIFIER | Gm9949   | ENSMUSG00000054589  | Transcript        | ENSMUST00000067743  | protein coding           | rs257620084 |
| 18:62187841-62187841 | regulatory region variant       | MODIFIER | -        | -                   | RegulatoryFeature | ENSMUSR000000377434 | promoter_flanking region | rs257620084 |
| 18:62542607-62542607 | intron variant                  | MODIFIER | Fbxo38   | ENSMUSG00000042211  | Transcript        | ENSMUST00000048688  | protein coding           | rs4138105   |
| 18:63666386-63666386 | intron variant                  | MODIFIER | Txn1l    | ENSMUSG000000324583 | Transcript        | ENSMUST00000025476  | protein coding           | rs46365352  |
| 18:6445660-6445660   | intron_variant                  | MODIFIER | Epc1     | ENSMUSG00000024240  | Transcript        | ENSMUST00000028100  | protein coding           | rs220744388 |
| 18:6445660-6445660   | intron_variant                  | MODIFIER | Epc1     | ENSMUSG00000024240  | Transcript        | ENSMUST00000115870  | protein coding           | rs220744388 |
| 18:6445660-6445660   | upstream_gene_variant           | MODIFIER | Epc1     | ENSMUSG00000024240  | Transcript        | ENSMUST00000124926  | protein coding           | rs220744388 |
| 18:64501060-64501060 | intron variant                  | MODIFIER | Nars     | ENSMUSG00000024587  | Transcript        | ENSMUST00000025483  | protein coding           | rs243162240 |
| 18:64501060-64501060 | regulatory region variant       | MODIFIER | -        | -                   | RegulatoryFeature | ENSMUSR000000608262 | CTCF binding site        | rs243162240 |
| 18:64501060-64501060 | regulatory region variant       | MODIFIER | -        | -                   | RegulatoryFeature | ENSMUSR000000608263 | TF binding site          | rs243162240 |
| 18:64501156-64501156 | intron_variant                  | MODIFIER | Nars     | ENSMUSG00000024587  | Transcript        | ENSMUST00000025483  | protein coding           | rs39355409  |
| 18:64501156-64501156 | regulatory_region_variant       | MODIFIER | -        | -                   | RegulatoryFeature | ENSMUSR000000608262 | CTCF_binding_site        | rs39355409  |
| 18:64501156-64501156 | regulatory_region_variant       | MODIFIER | -        | -                   | RegulatoryFeature | ENSMUSR000000608263 | TF_binding_site          | rs39355409  |
| 18:65444344-65444344 | intron variant                  | MODIFIER | Malt1    | ENSMUSG00000032688  | Transcript        | ENSMUST00000049248  | protein coding           | rs48030056  |
| 18:65444344-65444344 | intron variant                  | MODIFIER | Malt1    | ENSMUSG00000032688  | Transcript        | ENSMUST00000224056  | protein coding           | rs48030056  |
| 18:65444344-65444344 | upstream gene variant           | MODIFIER | Malt1    | ENSMUSG00000032688  | Transcript        | ENSMUST00000224229  | retained intron          | rs48030056  |
| 18:65444344-65444344 | intron variant,non coding trans | MODIFIER | Malt1    | ENSMUSG00000032688  | Transcript        | ENSMUST00000224265  | processed transcript     | rs48030056  |
| 18:65444344-65444344 | intron_variant,non_coding_trans | MODIFIER | Malt1    | ENSMUSG00000032688  | Transcript        | ENSMUST00000225085  | retained_intron          | rs48030056  |
| 18:65444344-65444344 | regulatory_region_variant       | MODIFIER | -        | -                   | RegulatoryFeature | ENSMUSR000000608454 | enhancer                 | rs48030056  |
| 18:65455244-65455244 | intron_variant                  | MODIFIER | Malt1    | ENSMUSG00000032688  | Transcript        | ENSMUST00000049248  | protein coding           | rs30270946  |
| 18:65455244-65455244 | intron variant                  | MODIFIER | Malt1    | ENSMUSG00000032688  | Transcript        | ENSMUST00000224056  | protein coding           | rs30270946  |
| 18:65455244-65455244 | non coding transcript exon var  | MODIFIER | Malt1    | ENSMUSG00000032688  | Transcript        | ENSMUST00000224229  | retained intron          | rs30270946  |
| 18:65455244-65455244 | intron variant,non coding trans | MODIFIER | Malt1    | ENSMUSG00000032688  | Transcript        | ENSMUST00000224265  | processed transcript     | rs30270946  |
| 18:65455244-65455244 | downstream_gene_variant         | MODIFIER | Malt1    | ENSMUSG00000032688  | Transcript        | ENSMUST00000225085  | retained_intron          | rs30270946  |
| 18:65455244-65455244 | downstream_gene_variant         | MODIFIER | Malt1    | ENSMUSG00000032688  | Transcript        | ENSMUST00000225659  | retained_intron          | rs30270946  |
| 18:67647086-67647086 | intron_variant                  | MODIFIER | Psmg2    | ENSMUSG00000024537  | Transcript        | ENSMUST00000025418  | protein coding           | rs237487890 |
| 18:67666980-67666980 | intron variant                  | MODIFIER | Ptpn2    | ENSMUSG00000024539  | Transcript        | ENSMUST00000025420  | protein coding           | rs30210988  |
| 18:67666980-67666980 | intron variant                  | MODIFIER | Ptpn2    | ENSMUSG00000024539  | Transcript        | ENSMUST00000120934  | protein coding           | rs30210988  |
| 18:67666980-67666980 | downstream gene variant         | MODIFIER | Ptpn2    | ENSMUSG00000024539  | Transcript        | ENSMUST00000122412  | protein coding           | rs30210988  |
| 18:67666980-67666980 | regulatory region variant       | MODIFIER | -        | -                   | RegulatoryFeature | ENSMUSR00000136871  | promoter_flanking region | rs30210988  |
| 18:67669025-67669025 | intron_variant                  | MODIFIER | Ptpn2    | ENSMUSG00000024539  | Transcript        | ENSMUST00000025420  | protein coding           | rs29775556  |
| 18:67669025-67669025 | intron_variant                  | MODIFIER | Ptpn2    | ENSMUSG00000024539  | Transcript        | ENSMUST00000120934  | protein coding           | rs29775556  |
| 18:67669025-67669025 | downstream_gene_variant         | MODIFIER | Ptpn2    | ENSMUSG00000024539  | Transcript        | ENSMUST00000122412  | protein coding           | rs29775556  |
| 18:67669025-67669025 | regulatory region variant       | MODIFIER | -        | -                   | RegulatoryFeature | ENSMUSR00000136872  | promoter_flanking region | rs29775556  |
| 18:67671918-67671918 | intron variant                  | MODIFIER | Ptpn2    | ENSMUSG00000024539  | Transcript        | ENSMUST00000025420  | protein coding           | rs30121094  |
| 18:67671918-67671918 | intron variant                  | MODIFIER | Ptpn2    | ENSMUSG00000024539  | Transcript        | ENSMUST00000120934  | protein coding           | rs30121094  |
| 18:67671918-67671918 | 3_prime_UTR_variant             | MODIFIER | Ptpn2    | ENSMUSG00000024539  | Transcript        | ENSMUST00000122412  | protein coding           | rs30121094  |
| 18:67671918-67671918 | downstream_gene_variant         | MODIFIER | Ptpn2    | ENSMUSG00000024539  | Transcript        | ENSMUST00000128169  | processed_transcript     | rs30121094  |
| 18:67789839-67789839 | intron_variant                  | MODIFIER | Seh1l    | ENSMUSG00000079614  | Transcript        | ENSMUST00000025421  | protein coding           | rs29541917  |
| 18:68449187-68449187 | intergenic variant              | MODIFIER | -        | -                   | -                 | -                   | -                        | rs30301945  |
| 18:69680109-69680109 | intron variant                  | MODIFIER | Tcf4     | ENSMUSG00000053477  | Transcript        | ENSMUST00000066717  | protein coding           | rs29636191  |
| 18:69680109-69680109 | intron variant                  | MODIFIER | Tcf4     | ENSMUSG00000053477  | Transcript        | ENSMUST00000078486  | protein coding           | rs29636191  |
| 18:69680109-69680109 | intron variant                  | MODIFIER | Tcf4     | ENSMUSG00000053477  | Transcript        | ENSMUST00000114977  | protein coding           | rs29636191  |
| 18:69680109-69680109 | intron_variant                  | MODIFIER | Tcf4     | ENSMUSG00000053477  | Transcript        | ENSMUST00000114978  | protein coding           | rs29636191  |
| 18:69680109-69680109 | intron_variant                  | MODIFIER | Tcf4     | ENSMUSG00000053477  | Transcript        | ENSMUST00000114980  | protein coding           | rs29636191  |
| 18:69680109-69680109 | intron_variant                  | MODIFIER | Tcf4     | ENSMUSG00000053477  | Transcript        | ENSMUST00000114982  | protein coding           | rs29636191  |
| 18:69680109-69680109 | intron variant                  | MODIFIER | Tcf4     | ENSMUSG00000053477  | Transcript        | ENSMUST00000114985  | protein coding           | rs29636191  |
| 18:69680109-69680109 | upstream gene variant           | MODIFIER | Tcf4     | ENSMUSG00000053477  | Transcript        | ENSMUST00000136019  | retained intron          | rs29636191  |
| 18:69680109-69680109 | non coding transcript exon var  | MODIFIER | Tcf4     | ENSMUSG00000053477  | Transcript        | ENSMUST00000146908  | retained intron          | rs29636191  |
| 18:69680109-69680109 | downstream_gene_variant         | MODIFIER | Tcf4     | ENSMUSG00000053477  | Transcript        | ENSMUST00000201037  | protein coding           | rs29636191  |
| 18:69680109-69680109 | intron_variant                  | MODIFIER | Tcf4     | ENSMUSG00000053477  | Transcript        | ENSMUST00000201094  | protein coding           | rs29636191  |
| 18:69680109-69680109 | intron_variant                  | MODIFIER | Tcf4     | ENSMUSG00000053477  | Transcript        | ENSMUST00000201205  | protein coding           | rs29636191  |
| 18:69680109-69680109 | intron variant                  | MODIFIER | Tcf4     | ENSMUSG00000053477  | Transcript        | ENSMUST00000201410  | protein coding           | rs29636191  |
| 18:69680109-69680109 | intron variant                  | MODIFIER | Tcf4     | ENSMUSG00000053477  | Transcript        | ENSMUST00000201631  | protein coding           | rs29636191  |
| 18:69680109-69680109 | intron variant                  | MODIFIER | Tcf4     | ENSMUSG00000053477  | Transcript        | ENSMUST00000201781  | protein coding           | rs29636191  |
| 18:69680109-69680109 | intron variant                  | MODIFIER | Tcf4     | ENSMUSG00000053477  | Transcript        | ENSMUST00000202057  | protein coding           | rs29636191  |
| 18:69680109-69680109 | intron_variant                  | MODIFIER | Tcf4     | ENSMUSG00000053477  | Transcript        | ENSMUST00000202116  | protein coding           | rs29636191  |
| 18:69680109-69680109 | intron_variant                  | MODIFIER | Tcf4     | ENSMUSG00000053477  | Transcript        | ENSMUST00000202354  | protein coding           | rs29636191  |
| 18:69680109-69680109 | intron_variant                  | MODIFIER | Tcf4     | ENSMUSG00000053477  | Transcript        | ENSMUST00000202435  | protein coding           | rs29636191  |





|                      |                                 |          |          |                    |                   |                    |                      |             |
|----------------------|---------------------------------|----------|----------|--------------------|-------------------|--------------------|----------------------|-------------|
| 18:69687560-69687560 | downstream gene variant         | MODIFIER | Tcf4     | ENSMUSG00000053477 | Transcript        | ENSMUST00000202937 | protein coding       | rs30262728  |
| 18:73643301-73643301 | intron_variant                  | MODIFIER | Smad4    | ENSMUSG00000024515 | Transcript        | ENSMUST00000025393 | protein_coding       | rs29561353  |
| 18:73643301-73643301 | intron_variant                  | MODIFIER | Smad4    | ENSMUSG00000024515 | Transcript        | ENSMUST00000114939 | protein_coding       | rs29561353  |
| 18:73643301-73643301 | upstream_gene_variant           | MODIFIER | Smad4    | ENSMUSG00000024515 | Transcript        | ENSMUST00000131339 | processed_transcript | rs29561353  |
| 18:73643301-73643301 | intron variant,non coding trans | MODIFIER | Smad4    | ENSMUSG00000024515 | Transcript        | ENSMUST00000142672 | processed_transcript | rs29561353  |
| 18:73643301-73643301 | intron variant,non coding trans | MODIFIER | Smad4    | ENSMUSG00000024515 | Transcript        | ENSMUST00000147315 | processed_transcript | rs29561353  |
| 18:73643301-73643301 | regulatory region variant       | MODIFIER | -        | -                  | RegulatoryFeature | ENSMUSR00000609403 | TF binding site      | rs29561353  |
| 18:73735843-73735843 | 3_prime_UTR_variant             | MODIFIER | Elac1    | ENSMUSG00000036941 | Transcript        | ENSMUST00000041138 | protein_coding       | rs37686795  |
| 18:73736329-73736329 | 3_prime_UTR_variant             | MODIFIER | Elac1    | ENSMUSG00000036941 | Transcript        | ENSMUST00000041138 | protein_coding       | -           |
| 18:73739359-73739359 | intron_variant                  | MODIFIER | Elac1    | ENSMUSG00000036941 | Transcript        | ENSMUST00000041138 | protein_coding       | rs29731576  |
| 18:73740753-73740753 | intron_variant                  | MODIFIER | Elac1    | ENSMUSG00000036941 | Transcript        | ENSMUST00000041138 | protein_coding       | rs235731950 |
| 18:73769700-73769701 | downstream gene variant         | MODIFIER | Me2      | ENSMUSG00000024556 | Transcript        | ENSMUST00000025439 | protein coding       | -           |
| 18:73812072-73812072 | intron variant                  | MODIFIER | Me2      | ENSMUSG00000024556 | Transcript        | ENSMUST00000025439 | protein coding       | rs48175534  |
| 18:74201291-74201291 | intron variant                  | MODIFIER | Ska1     | ENSMUSG00000036223 | Transcript        | ENSMUST00000040188 | protein coding       | rs47310168  |
| 18:74201291-74201291 | intron_variant                  | MODIFIER | Ska1     | ENSMUSG00000036223 | Transcript        | ENSMUST00000177604 | protein_coding       | rs47310168  |
| 18:75000596-75000596 | intron_variant                  | MODIFIER | Rpl17    | ENSMUSG00000062328 | Transcript        | ENSMUST00000079716 | protein_coding       | rs50329905  |
| 18:75000596-75000596 | upstream_gene_variant           | MODIFIER | Gm23301  | ENSMUSG00000064647 | Transcript        | ENSMUST00000082713 | snoRNA               | rs50329905  |
| 18:75000596-75000596 | upstream gene variant           | MODIFIER | Gm26202  | ENSMUSG00000064844 | Transcript        | ENSMUST00000082910 | snoRNA               | rs50329905  |
| 18:75000596-75000596 | upstream gene variant           | MODIFIER | Snord58b | ENSMUSG00000064871 | Transcript        | ENSMUST00000082937 | snoRNA               | rs50329905  |
| 18:75000596-75000596 | regulatory region variant       | MODIFIER | -        | -                  | RegulatoryFeature | ENSMUSR00000378446 | promoter             | rs50329905  |
| 18:75000637-75000637 | intron_variant                  | MODIFIER | Rpl17    | ENSMUSG00000062328 | Transcript        | ENSMUST00000079716 | protein_coding       | rs49281387  |
| 18:75000637-75000637 | upstream_gene_variant           | MODIFIER | Gm23301  | ENSMUSG00000064647 | Transcript        | ENSMUST00000082713 | snoRNA               | rs49281387  |
| 18:75000637-75000637 | upstream_gene_variant           | MODIFIER | Gm26202  | ENSMUSG00000064844 | Transcript        | ENSMUST00000082910 | snoRNA               | rs49281387  |
| 18:75000637-75000637 | upstream gene variant           | MODIFIER | Snord58b | ENSMUSG00000064871 | Transcript        | ENSMUST00000082937 | snoRNA               | rs49281387  |
| 18:75000637-75000637 | regulatory region variant       | MODIFIER | -        | -                  | RegulatoryFeature | ENSMUSR00000378446 | promoter             | rs49281387  |
| 18:75002881-75002881 | upstream gene variant           | MODIFIER | BC031181 | ENSMUSG00000036299 | Transcript        | ENSMUST00000040284 | protein coding       | rs36477182  |
| 18:75002881-75002881 | intron variant                  | MODIFIER | Rpl17    | ENSMUSG00000062328 | Transcript        | ENSMUST00000079716 | protein coding       | rs36477182  |
| 18:75002881-75002881 | downstream_gene_variant         | MODIFIER | Gm23301  | ENSMUSG00000064647 | Transcript        | ENSMUST00000082713 | snoRNA               | rs36477182  |
| 18:75002881-75002881 | downstream_gene_variant         | MODIFIER | Gm26202  | ENSMUSG00000064844 | Transcript        | ENSMUST00000082910 | snoRNA               | rs36477182  |
| 18:75002881-75002881 | downstream_gene_variant         | MODIFIER | Snord58b | ENSMUSG00000064871 | Transcript        | ENSMUST00000082937 | snoRNA               | rs36477182  |
| 18:75009156-75009156 | intron variant                  | MODIFIER | BC031181 | ENSMUSG00000036299 | Transcript        | ENSMUST00000040284 | protein coding       | rs254618033 |
| 18:77874445-77874445 | intron variant                  | MODIFIER | Pstpip2  | ENSMUSG00000025429 | Transcript        | ENSMUST00000114741 | protein coding       | rs47094517  |
| 18:9848423-9848423   | synonymous variant              | LOW      | Colec12  | ENSMUSG00000036103 | Transcript        | ENSMUST00000040069 | protein coding       | rs51891562  |
| 18:9848456-9848456   | synonymous variant              | LOW      | Colec12  | ENSMUSG00000036103 | Transcript        | ENSMUST00000040069 | protein_coding       | rs250421350 |
| 18:9959908-9959908   | intron_variant                  | MODIFIER | Thoc1    | ENSMUSG00000024287 | Transcript        | ENSMUST00000025137 | protein_coding       | rs29868877  |
| 18:9992291-9992291   | intron_variant                  | MODIFIER | Thoc1    | ENSMUSG00000024287 | Transcript        | ENSMUST00000025137 | protein_coding       | rs49176855  |
| 18:9992291-9992291   | downstream gene variant         | MODIFIER | Usp14    | ENSMUSG00000047879 | Transcript        | ENSMUST00000092096 | protein coding       | rs49176855  |
| 18:9992291-9992291   | downstream gene variant         | MODIFIER | Usp14    | ENSMUSG00000047879 | Transcript        | ENSMUST00000116669 | protein coding       | rs49176855  |
| 18:9992291-9992291   | downstream gene variant         | MODIFIER | Usp14    | ENSMUSG00000047879 | Transcript        | ENSMUST00000133594 | retained intron      | rs49176855  |
| 19:11426832-11426832 | 3 prime UTR variant             | MODIFIER | Ms4a4c   | ENSMUSG00000024675 | Transcript        | ENSMUST00000072729 | protein coding       | -           |
| 19:11426832-11426832 | downstream_gene_variant         | MODIFIER | Ms4a4c   | ENSMUSG00000024675 | Transcript        | ENSMUST00000119366 | protein_coding       | -           |
| 19:17221071-17221071 | 3_prime_UTR_variant             | MODIFIER | Prune2   | ENSMUSG00000039126 | Transcript        | ENSMUST00000087689 | protein_coding       | -           |
| 19:17221071-17221071 | 3_prime_UTR_variant             | MODIFIER | Prune2   | ENSMUSG00000039126 | Transcript        | ENSMUST00000223920 | protein_coding       | -           |
| 19:17221071-17221071 | non coding transcript exon var  | MODIFIER | Prune2   | ENSMUSG00000039126 | Transcript        | ENSMUST00000224059 | processed_transcript | -           |
| 19:17221071-17221071 | downstream gene variant         | MODIFIER | Prune2   | ENSMUSG00000039126 | Transcript        | ENSMUST00000224117 | retained intron      | -           |
| 19:17221071-17221071 | 3 prime UTR variant             | MODIFIER | Prune2   | ENSMUSG00000039126 | Transcript        | ENSMUST00000225351 | protein coding       | -           |
| 19:17221071-17221071 | 3_prime_UTR_variant             | MODIFIER | Prune2   | ENSMUSG00000039126 | Transcript        | ENSMUST00000226052 | protein_coding       | -           |
| 19:17221139-17221139 | 3_prime_UTR_variant             | MODIFIER | Prune2   | ENSMUSG00000039126 | Transcript        | ENSMUST00000087689 | protein_coding       | rs45996895  |
| 19:17221139-17221139 | 3_prime_UTR_variant             | MODIFIER | Prune2   | ENSMUSG00000039126 | Transcript        | ENSMUST00000223920 | protein_coding       | rs45996895  |
| 19:17221139-17221139 | non coding transcript exon var  | MODIFIER | Prune2   | ENSMUSG00000039126 | Transcript        | ENSMUST00000224059 | processed_transcript | rs45996895  |
| 19:17221139-17221139 | downstream gene variant         | MODIFIER | Prune2   | ENSMUSG00000039126 | Transcript        | ENSMUST00000224117 | retained intron      | rs45996895  |
| 19:17221139-17221139 | 3 prime UTR variant             | MODIFIER | Prune2   | ENSMUSG00000039126 | Transcript        | ENSMUST00000225351 | protein coding       | rs45996895  |
| 19:17221139-17221139 | 3 prime UTR variant             | MODIFIER | Prune2   | ENSMUSG00000039126 | Transcript        | ENSMUST00000226052 | protein coding       | rs45996895  |
| 19:17221282-17221282 | 3_prime_UTR_variant             | MODIFIER | Prune2   | ENSMUSG00000039126 | Transcript        | ENSMUST00000087689 | protein_coding       | rs50085178  |
| 19:17221282-17221282 | 3_prime_UTR_variant             | MODIFIER | Prune2   | ENSMUSG00000039126 | Transcript        | ENSMUST00000223920 | protein_coding       | rs50085178  |
| 19:17221282-17221282 | downstream_gene_variant         | MODIFIER | Prune2   | ENSMUSG00000039126 | Transcript        | ENSMUST00000224059 | processed_transcript | rs50085178  |
| 19:17221282-17221282 | downstream gene variant         | MODIFIER | Prune2   | ENSMUSG00000039126 | Transcript        | ENSMUST00000224117 | retained intron      | rs50085178  |
| 19:17221282-17221282 | 3 prime UTR variant             | MODIFIER | Prune2   | ENSMUSG00000039126 | Transcript        | ENSMUST00000225351 | protein coding       | rs50085178  |
| 19:17221282-17221282 | 3 prime UTR variant             | MODIFIER | Prune2   | ENSMUSG00000039126 | Transcript        | ENSMUST00000226052 | protein coding       | rs50085178  |
| 19:17221840-17221840 | 3_prime_UTR_variant             | MODIFIER | Prune2   | ENSMUSG00000039126 | Transcript        | ENSMUST00000087689 | protein_coding       | rs36450760  |
| 19:17221840-17221840 | 3_prime_UTR_variant             | MODIFIER | Prune2   | ENSMUSG00000039126 | Transcript        | ENSMUST00000223920 | protein_coding       | rs36450760  |
| 19:17221840-17221840 | downstream_gene_variant         | MODIFIER | Prune2   | ENSMUSG00000039126 | Transcript        | ENSMUST00000224059 | processed_transcript | rs36450760  |
| 19:17221840-17221840 | downstream_gene_variant         | MODIFIER | Prune2   | ENSMUSG00000039126 | Transcript        | ENSMUST00000224117 | retained intron      | rs36450760  |
| 19:17221840-17221840 | downstream gene variant         | MODIFIER | Prune2   | ENSMUSG00000039126 | Transcript        | ENSMUST00000225351 | protein coding       | rs36450760  |
| 19:17221840-17221840 | downstream gene variant         | MODIFIER | Prune2   | ENSMUSG00000039126 | Transcript        | ENSMUST00000226052 | protein coding       | rs36450760  |
| 19:17223452-17223452 | 3 prime UTR variant             | MODIFIER | Prune2   | ENSMUSG00000039126 | Transcript        | ENSMUST00000087689 | protein coding       | rs48024103  |
| 19:17223452-17223452 | downstream_gene_variant         | MODIFIER | Prune2   | ENSMUSG00000039126 | Transcript        | ENSMUST00000223920 | protein_coding       | rs48024103  |
| 19:17223452-17223452 | downstream_gene_variant         | MODIFIER | Prune2   | ENSMUSG00000039126 | Transcript        | ENSMUST00000224059 | processed_transcript | rs48024103  |
| 19:17223452-17223452 | downstream_gene_variant         | MODIFIER | Prune2   | ENSMUSG00000039126 | Transcript        | ENSMUST00000224117 | retained_intron      | rs48024103  |

clal\_RF

|                      |                                 |          |               |                    |                   |                    |                         |             |
|----------------------|---------------------------------|----------|---------------|--------------------|-------------------|--------------------|-------------------------|-------------|
| 19:17223452-17223452 | downstream gene variant         | MODIFIER | Prune2        | ENSMUSG00000039126 | Transcript        | ENSMUST00000225351 | protein coding          | rs48024103  |
| 19:17223452-17223452 | downstream_gene_variant         | MODIFIER | Prune2        | ENSMUSG00000039126 | Transcript        | ENSMUST00000226052 | protein coding          | rs48024103  |
| 19:17223452-17223452 | regulatory_region_variant       | MODIFIER | -             | -                  | RegulatoryFeature | ENSMUSR00000613340 | enhancer                | rs48024103  |
| 19:18591177-18591177 | intron_variant                  | MODIFIER | Ostf1         | ENSMUSG00000024725 | Transcript        | ENSMUST00000025631 | protein coding          | rs223867303 |
| 19:18591177-18591177 | downstream gene variant         | MODIFIER | Ostf1         | ENSMUSG00000024725 | Transcript        | ENSMUST00000138860 | retained intron         | rs223867303 |
| 19:18591177-18591177 | intron variant,non coding trans | MODIFIER | Ostf1         | ENSMUSG00000024725 | Transcript        | ENSMUST00000156908 | retained intron         | rs223867303 |
| 19:18591177-18591177 | regulatory region variant       | MODIFIER | -             | -                  | RegulatoryFeature | ENSMUSR00000613493 | enhancer                | rs223867303 |
| 19:21408893-21408893 | intron_variant                  | MODIFIER | Gda           | ENSMUSG00000058624 | Transcript        | ENSMUST00000087600 | protein coding          | rs30693308  |
| 19:21408893-21408893 | intron_variant                  | MODIFIER | Gda           | ENSMUSG00000058624 | Transcript        | ENSMUST00000121725 | protein coding          | rs30693308  |
| 19:25168535-25168535 | intron_variant                  | MODIFIER | Dock8         | ENSMUSG00000052085 | Transcript        | ENSMUST00000025831 | protein coding          | rs30446420  |
| 19:25168535-25168535 | upstream gene variant           | MODIFIER | Gm24252       | ENSMUSG00000065634 | Transcript        | ENSMUST00000083700 | snoRNA                  | rs30446420  |
| 19:25191955-25191955 | intron variant                  | MODIFIER | Dock8         | ENSMUSG00000052085 | Transcript        | ENSMUST00000025831 | protein coding          | rs31109605  |
| 19:27764914-27764914 | downstream gene variant         | MODIFIER | Rfx3          | ENSMUSG00000040929 | Transcript        | ENSMUST00000046889 | protein coding          | rs30359004  |
| 19:27764914-27764914 | 3 prime UTR variant             | MODIFIER | Rfx3          | ENSMUSG00000040929 | Transcript        | ENSMUST00000165566 | protein coding          | rs30359004  |
| 19:27764914-27764914 | downstream_gene_variant         | MODIFIER | Rfx3          | ENSMUSG00000040929 | Transcript        | ENSMUST00000172498 | processed_transcript    | rs30359004  |
| 19:27764914-27764914 | downstream_gene_variant         | MODIFIER | Rfx3          | ENSMUSG00000040929 | Transcript        | ENSMUST00000172907 | protein coding          | rs30359004  |
| 19:27764914-27764914 | downstream_gene_variant         | MODIFIER | Rfx3          | ENSMUSG00000040929 | Transcript        | ENSMUST00000173863 | nonsense_mediated_decay | rs30359004  |
| 19:27764914-27764914 | downstream gene variant         | MODIFIER | Rfx3          | ENSMUSG00000040929 | Transcript        | ENSMUST00000174850 | protein coding          | rs30359004  |
| 19:29351367-29351367 | intron variant                  | MODIFIER | Plgkrt        | ENSMUSG00000016495 | Transcript        | ENSMUST00000016639 | protein coding          | rs37262074  |
| 19:29351367-29351367 | intron variant                  | MODIFIER | Plgkrt        | ENSMUSG00000016495 | Transcript        | ENSMUST00000126800 | protein coding          | rs37262074  |
| 19:29351367-29351367 | non_coding_transcript_exon_var  | MODIFIER | Plgkrt        | ENSMUSG00000016495 | Transcript        | ENSMUST00000141838 | retained_intron         | rs37262074  |
| 19:29351367-29351367 | intron_variant                  | MODIFIER | Plgkrt        | ENSMUSG00000016495 | Transcript        | ENSMUST00000143467 | protein coding          | rs37262074  |
| 19:29351367-29351367 | intron_variant                  | MODIFIER | Plgkrt        | ENSMUSG00000016495 | Transcript        | ENSMUST00000152936 | protein coding          | rs37262074  |
| 19:29351367-29351367 | intron variant                  | MODIFIER | Plgkrt        | ENSMUSG00000016495 | Transcript        | ENSMUST00000155367 | protein coding          | rs37262074  |
| 19:29352302-29352302 | intron variant                  | MODIFIER | Plgkrt        | ENSMUSG00000016495 | Transcript        | ENSMUST00000016639 | protein coding          | rs251977700 |
| 19:29352302-29352302 | intron variant                  | MODIFIER | Plgkrt        | ENSMUSG00000016495 | Transcript        | ENSMUST00000126800 | protein coding          | rs251977700 |
| 19:29352302-29352302 | upstream gene variant           | MODIFIER | Plgkrt        | ENSMUSG00000016495 | Transcript        | ENSMUST00000141838 | retained intron         | rs251977700 |
| 19:29352302-29352302 | intron_variant                  | MODIFIER | Plgkrt        | ENSMUSG00000016495 | Transcript        | ENSMUST00000143467 | protein coding          | rs251977700 |
| 19:29352302-29352302 | intron_variant                  | MODIFIER | Plgkrt        | ENSMUSG00000016495 | Transcript        | ENSMUST00000152936 | protein coding          | rs251977700 |
| 19:29352302-29352302 | intron_variant                  | MODIFIER | Plgkrt        | ENSMUSG00000016495 | Transcript        | ENSMUST00000155367 | protein coding          | rs251977700 |
| 19:29352302-29352302 | intron variant                  | MODIFIER | Plgkrt        | ENSMUSG00000016495 | Transcript        | ENSMUST0000016639  | protein coding          | rs215508169 |
| 19:29352302-29352302 | upstream gene variant           | MODIFIER | Plgkrt        | ENSMUSG00000016495 | Transcript        | ENSMUST00000126800 | protein coding          | rs215508169 |
| 19:29352302-29352302 | intron_variant                  | MODIFIER | Plgkrt        | ENSMUSG00000016495 | Transcript        | ENSMUST00000141838 | retained intron         | rs215508169 |
| 19:29352302-29352302 | intron_variant                  | MODIFIER | Plgkrt        | ENSMUSG00000016495 | Transcript        | ENSMUST00000143467 | protein coding          | rs215508169 |
| 19:29352302-29352302 | intron_variant                  | MODIFIER | Plgkrt        | ENSMUSG00000016495 | Transcript        | ENSMUST00000152936 | protein coding          | rs215508169 |
| 19:29352302-29352302 | intron variant                  | MODIFIER | Plgkrt        | ENSMUSG00000016495 | Transcript        | ENSMUST00000155367 | protein coding          | rs215508169 |
| 19:29352302-29352302 | intron variant                  | MODIFIER | Plgkrt        | ENSMUSG00000016495 | Transcript        | ENSMUST0000016639  | protein coding          | rs36880543  |
| 19:29352302-29352302 | intron variant                  | MODIFIER | Plgkrt        | ENSMUSG00000016495 | Transcript        | ENSMUST00000126800 | protein coding          | rs36880543  |
| 19:29352302-29352302 | downstream gene variant         | MODIFIER | Plgkrt        | ENSMUSG00000016495 | Transcript        | ENSMUST00000129608 | processed transcript    | rs36880543  |
| 19:29352302-29352302 | downstream gene variant         | MODIFIER | Plgkrt        | ENSMUSG00000016495 | Transcript        | ENSMUST00000138051 | protein coding          | rs36880543  |
| 19:29352302-29352302 | downstream_gene_variant         | MODIFIER | Plgkrt        | ENSMUSG00000016495 | Transcript        | ENSMUST00000139860 | processed_transcript    | rs36880543  |
| 19:29352302-29352302 | intron_variant                  | MODIFIER | Plgkrt        | ENSMUSG00000016495 | Transcript        | ENSMUST00000143467 | protein coding          | rs36880543  |
| 19:29352302-29352302 | intron_variant                  | MODIFIER | Plgkrt        | ENSMUSG00000016495 | Transcript        | ENSMUST00000152936 | protein coding          | rs36880543  |
| 19:29352302-29352302 | intron variant                  | MODIFIER | Plgkrt        | ENSMUSG00000016495 | Transcript        | ENSMUST00000155367 | protein coding          | rs36880543  |
| 19:29352302-29352302 | intron variant                  | MODIFIER | Plgkrt        | ENSMUSG00000016495 | Transcript        | ENSMUST0000016640  | protein coding          | rs36631654  |
| 19:29383648-29383648 | intron variant                  | MODIFIER | Cd274         | ENSMUSG00000016496 | Transcript        | ENSMUST00000016640 | protein coding          | rs46947027  |
| 19:32014247-32014247 | synonymous variant              | LOW      | Asah2         | ENSMUSG00000024887 | Transcript        | ENSMUST00000096119 | protein coding          | rs46947027  |
| 19:34593600-34593600 | downstream_gene_variant         | MODIFIER | Ifit3         | ENSMUSG00000074896 | Transcript        | ENSMUST00000102825 | protein coding          | rs13467978  |
| 19:34593600-34593600 | 3_prime_UTR_variant             | MODIFIER | Ifit1bl1      | ENSMUSG00000079339 | Transcript        | ENSMUST00000112467 | protein coding          | rs13467978  |
| 19:34593600-34593600 | 3_prime_UTR_variant             | MODIFIER | Ifit1bl1      | ENSMUSG00000079339 | Transcript        | ENSMUST00000168254 | protein coding          | rs13467978  |
| 19:37986003-37986003 | synonymous variant              | LOW      | Myof          | ENSMUSG00000048612 | Transcript        | ENSMUST00000041475 | protein coding          | rs31283892  |
| 19:37986003-37986003 | synonymous variant              | LOW      | Myof          | ENSMUSG00000048612 | Transcript        | ENSMUST00000172095 | protein coding          | rs31283892  |
| 19:37986003-37986003 | non coding transcript exon var  | MODIFIER | Myof          | ENSMUSG00000048612 | Transcript        | ENSMUST00000223650 | processed transcript    | rs31283892  |
| 19:37986003-37986003 | synonymous variant              | LOW      | Myof          | ENSMUSG00000048612 | Transcript        | ENSMUST00000226068 | protein coding          | rs31283892  |
| 19:37986003-37986003 | non_coding_transcript_exon_var  | MODIFIER | Myof          | ENSMUSG00000048612 | Transcript        | ENSMUST00000226084 | retained_intron         | rs31283892  |
| 19:38055168-38055168 | upstream_gene_variant           | MODIFIER | I830134H01Rik | ENSMUSG00000069554 | Transcript        | ENSMUST00000092265 | lincRNA                 | rs47317165  |
| 19:38055168-38055168 | intron_variant                  | MODIFIER | Cep55         | ENSMUSG00000024989 | Transcript        | ENSMUST00000096096 | protein coding          | rs47317165  |
| 19:38055168-38055168 | intron variant                  | MODIFIER | Cep55         | ENSMUSG00000024989 | Transcript        | ENSMUST00000116506 | protein coding          | rs47317165  |
| 19:38055168-38055168 | 5 prime UTR variant             | MODIFIER | Cep55         | ENSMUSG00000024989 | Transcript        | ENSMUST00000169673 | protein coding          | rs47317165  |
| 19:38055168-38055168 | upstream gene variant           | MODIFIER | I830134H01Rik | ENSMUSG00000069554 | Transcript        | ENSMUST00000181592 | lincRNA                 | rs47317165  |
| 19:38055168-38055168 | regulatory_region_variant       | MODIFIER | -             | -                  | RegulatoryFeature | ENSMUSR00000144503 | promoter                | rs47317165  |
| 19:38055181-38055181 | upstream_gene_variant           | MODIFIER | I830134H01Rik | ENSMUSG00000069554 | Transcript        | ENSMUST00000092265 | lincRNA                 | rs51891577  |
| 19:38055181-38055181 | intron_variant                  | MODIFIER | Cep55         | ENSMUSG00000024989 | Transcript        | ENSMUST00000096096 | protein coding          | rs51891577  |
| 19:38055181-38055181 | intron variant                  | MODIFIER | Cep55         | ENSMUSG00000024989 | Transcript        | ENSMUST00000116506 | protein coding          | rs51891577  |
| 19:38055181-38055181 | 5 prime UTR variant             | MODIFIER | Cep55         | ENSMUSG00000024989 | Transcript        | ENSMUST00000169673 | protein coding          | rs51891577  |
| 19:38055181-38055181 | upstream gene variant           | MODIFIER | I830134H01Rik | ENSMUSG00000069554 | Transcript        | ENSMUST00000181592 | lincRNA                 | rs51891577  |
| 19:38055181-38055181 | regulatory region variant       | MODIFIER | -             | -                  | RegulatoryFeature | ENSMUSR00000144503 | promoter                | rs51891577  |
| 19:38070719-38070719 | upstream_gene_variant           | MODIFIER | Gm23300       | ENSMUSG00000064646 | Transcript        | ENSMUST00000082712 | snoRNA                  | rs30513637  |
| 19:38070719-38070719 | intron_variant                  | MODIFIER | Cep55         | ENSMUSG00000024989 | Transcript        | ENSMUST00000096096 | protein coding          | rs30513637  |
| 19:38070719-38070719 | intron_variant                  | MODIFIER | Cep55         | ENSMUSG00000024989 | Transcript        | ENSMUST00000116506 | protein coding          | rs30513637  |

|                      |                                    |          |          |                     |                   |                     |                         |             |
|----------------------|------------------------------------|----------|----------|---------------------|-------------------|---------------------|-------------------------|-------------|
| 19:38070719-38070719 | intron variant                     | MODIFIER | Cep55    | ENSMUSG00000024989  | Transcript        | ENSMUST00000169673  | protein coding          | rs30513637  |
| 19:38222774-38222774 | intron_variant                     | MODIFIER | Fra10ac1 | ENSMUSG000000054237 | Transcript        | ENSMUST000000067167 | protein_coding          | rs46108007  |
| 19:38223278-38223278 | intron_variant                     | MODIFIER | Fra10ac1 | ENSMUSG000000054237 | Transcript        | ENSMUST000000067167 | protein_coding          | rs46627200  |
| 19:38223278-38223278 | regulatory_region_variant          | MODIFIER | -        | -                   | RegulatoryFeature | ENSMUSR00000144528  | promoter                | rs46627200  |
| 19:41926471-41926471 | intron variant                     | MODIFIER | Exosc1   | ENSMUSG00000034321  | Transcript        | ENSMUST00000075280  | protein coding          | rs30931558  |
| 19:41926471-41926471 | intron variant                     | MODIFIER | Exosc1   | ENSMUSG00000034321  | Transcript        | ENSMUST00000112123  | protein coding          | rs30931558  |
| 19:41928593-41928593 | upstream gene variant              | MODIFIER | Zdhhc16  | ENSMUSG00000025157  | Transcript        | ENSMUST00000026154  | protein coding          | rs238228379 |
| 19:41928593-41928593 | intron_variant                     | MODIFIER | Exosc1   | ENSMUSG00000034321  | Transcript        | ENSMUST00000075280  | protein_coding          | rs238228379 |
| 19:41928593-41928593 | intron_variant                     | MODIFIER | Exosc1   | ENSMUSG00000034321  | Transcript        | ENSMUST00000112123  | protein_coding          | rs238228379 |
| 19:41928593-41928593 | upstream_gene_variant              | MODIFIER | Zdhhc16  | ENSMUSG00000025157  | Transcript        | ENSMUST00000224258  | protein_coding          | rs238228379 |
| 19:41928593-41928593 | upstream gene variant              | MODIFIER | Zdhhc16  | ENSMUSG00000025157  | Transcript        | ENSMUST00000224896  | protein coding          | rs238228379 |
| 19:41929818-41929818 | upstream gene variant              | MODIFIER | Zdhhc16  | ENSMUSG00000025157  | Transcript        | ENSMUST00000026154  | protein coding          | rs36416337  |
| 19:41929818-41929818 | intron variant                     | MODIFIER | Exosc1   | ENSMUSG00000034321  | Transcript        | ENSMUST00000075280  | protein coding          | rs36416337  |
| 19:41929818-41929818 | intron variant                     | MODIFIER | Exosc1   | ENSMUSG00000034321  | Transcript        | ENSMUST00000112123  | protein coding          | rs36416337  |
| 19:41929818-41929818 | upstream_gene_variant              | MODIFIER | Zdhhc16  | ENSMUSG00000025157  | Transcript        | ENSMUST00000224258  | protein_coding          | rs36416337  |
| 19:41929818-41929818 | upstream_gene_variant              | MODIFIER | Zdhhc16  | ENSMUSG00000025157  | Transcript        | ENSMUST00000224896  | protein_coding          | rs36416337  |
| 19:41931440-41931440 | upstream_gene_variant              | MODIFIER | Zdhhc16  | ENSMUSG00000025157  | Transcript        | ENSMUST00000026154  | protein_coding          | rs36570438  |
| 19:41931440-41931440 | intron variant                     | MODIFIER | Exosc1   | ENSMUSG00000034321  | Transcript        | ENSMUST00000075280  | protein coding          | rs36570438  |
| 19:41931440-41931440 | intron variant                     | MODIFIER | Exosc1   | ENSMUSG00000034321  | Transcript        | ENSMUST00000112123  | protein coding          | rs36570438  |
| 19:41931440-41931440 | upstream gene variant              | MODIFIER | Zdhhc16  | ENSMUSG00000025157  | Transcript        | ENSMUST00000224258  | protein coding          | rs36570438  |
| 19:41931440-41931440 | upstream_gene_variant              | MODIFIER | Zdhhc16  | ENSMUSG00000025157  | Transcript        | ENSMUST00000224896  | protein_coding          | rs36570438  |
| 19:41932827-41932827 | upstream_gene_variant              | MODIFIER | Zdhhc16  | ENSMUSG00000025157  | Transcript        | ENSMUST00000026154  | protein_coding          | rs30566072  |
| 19:41932827-41932827 | intron_variant                     | MODIFIER | Exosc1   | ENSMUSG00000034321  | Transcript        | ENSMUST00000075280  | protein_coding          | rs30566072  |
| 19:41932827-41932827 | intron variant                     | MODIFIER | Exosc1   | ENSMUSG00000034321  | Transcript        | ENSMUST00000112123  | protein coding          | rs30566072  |
| 19:41932827-41932827 | upstream gene variant              | MODIFIER | Zdhhc16  | ENSMUSG00000025157  | Transcript        | ENSMUST00000224258  | protein coding          | rs30566072  |
| 19:41932827-41932827 | upstream gene variant              | MODIFIER | Zdhhc16  | ENSMUSG00000025157  | Transcript        | ENSMUST00000224258  | protein coding          | rs30566072  |
| 19:41932827-41932827 | upstream gene variant              | MODIFIER | Zdhhc16  | ENSMUSG00000025157  | Transcript        | ENSMUST00000224562  | protein coding          | rs30566072  |
| 19:41932827-41932827 | upstream_gene_variant              | MODIFIER | Zdhhc16  | ENSMUSG00000025157  | Transcript        | ENSMUST00000224896  | protein coding          | rs30566072  |
| 19:41932827-41932827 | regulatory_region_variant          | MODIFIER | -        | -                   | RegulatoryFeature | ENSMUST00000225968  | nonsense_mediated_decay | rs30566072  |
| 19:42013958-42013958 | intron_variant                     | MODIFIER | Ubt1     | ENSMUSG00000025171  | Transcript        | ENSMUSR00000145125  | promoter                | rs30566072  |
| 19:42593841-42593841 | downstream gene variant            | MODIFIER | R3hcc1   | ENSMUSG00000025184  | Transcript        | ENSMUST00000026170  | protein_coding          | rs50162804  |
| 19:42593841-42593841 | downstream gene variant            | MODIFIER | Loxl4    | ENSMUSG00000025185  | Transcript        | ENSMUST00000026188  | protein coding          | rs3715545   |
| 19:42593841-42593841 | downstream gene variant            | MODIFIER | R3hcc1   | ENSMUSG00000025184  | Transcript        | ENSMUST00000026190  | protein coding          | rs3715545   |
| 19:42593841-42593841 | downstream_gene_variant            | MODIFIER | Loxl4    | ENSMUSG00000025185  | Transcript        | ENSMUST00000160107  | protein coding          | rs3715545   |
| 19:42593841-42593841 | downstream_gene_variant            | MODIFIER | Loxl4    | ENSMUSG00000025185  | Transcript        | ENSMUST00000164786  | protein_coding          | rs3715545   |
| 19:42593841-42593841 | downstream_gene_variant            | MODIFIER | Loxl4    | ENSMUSG00000025185  | Transcript        | ENSMUST00000171432  | protein_coding          | rs3715545   |
| 19:42594458-42594458 | downstream_gene_variant            | MODIFIER | R3hcc1   | ENSMUSG00000025184  | Transcript        | ENSMUST00000026188  | protein_coding          | rs30598323  |
| 19:42594458-42594458 | 3 prime UTR variant                | MODIFIER | Loxl4    | ENSMUSG00000025185  | Transcript        | ENSMUST00000026190  | protein coding          | rs30598323  |
| 19:42594458-42594458 | downstream gene variant            | MODIFIER | R3hcc1   | ENSMUSG00000025184  | Transcript        | ENSMUST00000160107  | protein coding          | rs30598323  |
| 19:42594458-42594458 | downstream gene variant            | MODIFIER | Loxl4    | ENSMUSG00000025185  | Transcript        | ENSMUST00000164786  | protein coding          | rs30598323  |
| 19:42594458-42594458 | downstream gene variant            | MODIFIER | Loxl4    | ENSMUSG00000025185  | Transcript        | ENSMUST00000171432  | protein coding          | rs30598323  |
| 19:42594485-42594485 | downstream_gene_variant            | MODIFIER | R3hcc1   | ENSMUSG00000025184  | Transcript        | ENSMUST00000026188  | protein_coding          | rs31149344  |
| 19:42594485-42594485 | 3_prime_UTR_variant                | MODIFIER | Loxl4    | ENSMUSG00000025185  | Transcript        | ENSMUST00000026190  | protein_coding          | rs31149344  |
| 19:42594485-42594485 | downstream_gene_variant            | MODIFIER | R3hcc1   | ENSMUSG00000025184  | Transcript        | ENSMUST00000160107  | protein_coding          | rs31149344  |
| 19:42594485-42594485 | downstream gene variant            | MODIFIER | Loxl4    | ENSMUSG00000025185  | Transcript        | ENSMUST00000164786  | protein coding          | rs31149344  |
| 19:42594485-42594485 | downstream gene variant            | MODIFIER | Loxl4    | ENSMUSG00000025185  | Transcript        | ENSMUST00000171432  | protein coding          | rs31149344  |
| 19:42602183-42602183 | synonymous variant                 | LOW      | Loxl4    | ENSMUSG00000025185  | Transcript        | ENSMUST00000026190  | protein coding          | rs38201618  |
| 19:42602183-42602183 | non_coding_transcript_exon_variant | MODIFIER | Loxl4    | ENSMUSG00000025185  | Transcript        | ENSMUST00000164014  | processed_transcript    | rs38201618  |
| 19:42602183-42602183 | synonymous_variant                 | LOW      | Loxl4    | ENSMUSG00000025185  | Transcript        | ENSMUST00000164786  | protein_coding          | rs38201618  |
| 19:42602183-42602183 | synonymous_variant                 | LOW      | Loxl4    | ENSMUSG00000025185  | Transcript        | ENSMUST00000171432  | protein_coding          | rs38201618  |
| 19:42606704-42606704 | synonymous variant                 | LOW      | Loxl4    | ENSMUSG00000025185  | Transcript        | ENSMUST00000026190  | protein coding          | rs3705236   |
| 19:42606704-42606704 | upstream gene variant              | MODIFIER | Loxl4    | ENSMUSG00000025185  | Transcript        | ENSMUST00000164014  | processed_transcript    | rs3705236   |
| 19:42606704-42606704 | synonymous variant                 | LOW      | Loxl4    | ENSMUSG00000025185  | Transcript        | ENSMUST00000164786  | protein coding          | rs3705236   |
| 19:42606704-42606704 | downstream gene variant            | MODIFIER | Loxl4    | ENSMUSG00000025185  | Transcript        | ENSMUST00000166128  | protein coding          | rs3705236   |
| 19:42606704-42606704 | synonymous_variant                 | LOW      | Loxl4    | ENSMUSG00000025185  | Transcript        | ENSMUST00000171432  | protein_coding          | rs3705236   |
| 19:42607655-42607655 | missense_variant                   | MODERATE | Loxl4    | ENSMUSG00000025185  | Transcript        | ENSMUST00000026190  | protein_coding          | rs51280541  |
| 19:42607655-42607655 | upstream_gene_variant              | MODIFIER | Loxl4    | ENSMUSG00000025185  | Transcript        | ENSMUST00000164014  | processed_transcript    | rs51280541  |
| 19:42607655-42607655 | missense variant                   | MODERATE | Loxl4    | ENSMUSG00000025185  | Transcript        | ENSMUST00000164786  | protein coding          | rs51280541  |
| 19:42607655-42607655 | missense variant                   | MODERATE | Loxl4    | ENSMUSG00000025185  | Transcript        | ENSMUST00000166128  | protein coding          | rs51280541  |
| 19:42607655-42607655 | missense variant                   | MODERATE | Loxl4    | ENSMUSG00000025185  | Transcript        | ENSMUST00000171432  | protein coding          | rs51280541  |
| 19:42608346-42608346 | synonymous_variant                 | LOW      | Loxl4    | ENSMUSG00000025185  | Transcript        | ENSMUST00000026190  | protein_coding          | rs51669286  |
| 19:42608346-42608346 | synonymous_variant                 | LOW      | Loxl4    | ENSMUSG00000025185  | Transcript        | ENSMUST00000164786  | protein_coding          | rs51669286  |
| 19:42608346-42608346 | synonymous_variant                 | LOW      | Loxl4    | ENSMUSG00000025185  | Transcript        | ENSMUST00000166128  | protein_coding          | rs51669286  |
| 19:42608346-42608346 | synonymous_variant                 | LOW      | Loxl4    | ENSMUSG00000025185  | Transcript        | ENSMUST00000171432  | protein_coding          | rs51669286  |
| 19:42608417-42608417 | missense variant                   | MODERATE | Loxl4    | ENSMUSG00000025185  | Transcript        | ENSMUST00000026190  | protein coding          | rs48954133  |
| 19:42608417-42608417 | missense variant                   | MODERATE | Loxl4    | ENSMUSG00000025185  | Transcript        | ENSMUST00000164786  | protein coding          | rs48954133  |
| 19:42608417-42608417 | missense variant                   | MODERATE | Loxl4    | ENSMUSG00000025185  | Transcript        | ENSMUST00000166128  | protein coding          | rs48954133  |
| 19:42608417-42608417 | missense_variant                   | MODERATE | Loxl4    | ENSMUSG00000025185  | Transcript        | ENSMUST00000171432  | protein_coding          | rs48954133  |
| 19:42608463-42608463 | synonymous_variant                 | LOW      | Loxl4    | ENSMUSG00000025185  | Transcript        | ENSMUST00000026190  | protein_coding          | rs51599104  |
| 19:42608463-42608463 | synonymous_variant                 | LOW      | Loxl4    | ENSMUSG00000025185  | Transcript        | ENSMUST00000164786  | protein_coding          | rs51599104  |



|                      |                                 |          |         |                    |                   |                    |                         |             |
|----------------------|---------------------------------|----------|---------|--------------------|-------------------|--------------------|-------------------------|-------------|
| 19:42608463-42608463 | synonymous variant              | LOW      | Loxl4   | ENSMUSG00000025185 | Transcript        | ENSMUST00000166128 | protein coding          | rs51599104  |
| 19:42608463-42608463 | synonymous_variant              | LOW      | Loxl4   | ENSMUSG00000025185 | Transcript        | ENSMUST00000171432 | protein coding          | rs51599104  |
| 19:42737219-42737220 | intron_variant                  | MODIFIER | Pyroxd2 | ENSMUSG00000060224 | Transcript        | ENSMUST00000076505 | protein coding          | rs254473498 |
| 19:42737321-42737323 | intron_variant                  | MODIFIER | Pyroxd2 | ENSMUSG00000060224 | Transcript        | ENSMUST00000076505 | protein coding          | rs231220175 |
| 19:42737392-42737392 | intron variant                  | MODIFIER | Pyroxd2 | ENSMUSG00000060224 | Transcript        | ENSMUST00000076505 | protein coding          | rs52120205  |
| 19:42737485-42737486 | intron variant                  | MODIFIER | Pyroxd2 | ENSMUSG00000060224 | Transcript        | ENSMUST00000076505 | protein coding          | -           |
| 19:42737487-42737488 | intron variant                  | MODIFIER | Pyroxd2 | ENSMUSG00000060224 | Transcript        | ENSMUST00000076505 | protein coding          | -           |
| 19:42748073-42748073 | intron_variant                  | MODIFIER | Pyroxd2 | ENSMUSG00000060224 | Transcript        | ENSMUST00000076505 | protein coding          | rs50698867  |
| 19:42748182-42748182 | intron_variant                  | MODIFIER | Pyroxd2 | ENSMUSG00000060224 | Transcript        | ENSMUST00000076505 | protein coding          | rs49357333  |
| 19:42748187-42748187 | intron_variant                  | MODIFIER | Pyroxd2 | ENSMUSG00000060224 | Transcript        | ENSMUST00000076505 | protein coding          | rs47050691  |
| 19:42749079-42749079 | intron variant                  | MODIFIER | Pyroxd2 | ENSMUSG00000060224 | Transcript        | ENSMUST00000076505 | protein coding          | rs36719178  |
| 19:42749506-42749506 | intron variant                  | MODIFIER | Pyroxd2 | ENSMUSG00000060224 | Transcript        | ENSMUST00000076505 | protein coding          | rs38708442  |
| 19:42749532-42749532 | intron variant                  | MODIFIER | Pyroxd2 | ENSMUSG00000060224 | Transcript        | ENSMUST00000076505 | protein coding          | rs38455178  |
| 19:42749562-42749562 | intron variant                  | MODIFIER | Pyroxd2 | ENSMUSG00000060224 | Transcript        | ENSMUST00000076505 | protein coding          | rs36624216  |
| 19:42749608-42749608 | intron_variant                  | MODIFIER | Pyroxd2 | ENSMUSG00000060224 | Transcript        | ENSMUST00000076505 | protein coding          | rs48833767  |
| 19:42750161-42750161 | intron_variant                  | MODIFIER | Pyroxd2 | ENSMUSG00000060224 | Transcript        | ENSMUST00000076505 | protein coding          | rs36950602  |
| 19:42750161-42750161 | downstream_gene_variant         | MODIFIER | Hps1    | ENSMUSG00000025188 | Transcript        | ENSMUST00000162004 | protein coding          | rs36950602  |
| 19:42752591-42752591 | downstream gene variant         | MODIFIER | Hps1    | ENSMUSG00000025188 | Transcript        | ENSMUST00000026194 | protein coding          | rs37395859  |
| 19:42752591-42752591 | 5 prime UTR variant             | MODIFIER | Pyroxd2 | ENSMUSG00000060224 | Transcript        | ENSMUST00000076505 | protein coding          | rs37395859  |
| 19:42752591-42752591 | downstream gene variant         | MODIFIER | Hps1    | ENSMUSG00000025188 | Transcript        | ENSMUST00000159974 | retained intron         | rs37395859  |
| 19:42752591-42752591 | downstream_gene_variant         | MODIFIER | Hps1    | ENSMUSG00000025188 | Transcript        | ENSMUST00000160455 | protein coding          | rs37395859  |
| 19:42752591-42752591 | downstream_gene_variant         | MODIFIER | Hps1    | ENSMUSG00000025188 | Transcript        | ENSMUST00000161252 | nonsense mediated decay | rs37395859  |
| 19:42752591-42752591 | downstream_gene_variant         | MODIFIER | Hps1    | ENSMUSG00000025188 | Transcript        | ENSMUST00000162004 | protein coding          | rs37395859  |
| 19:42752591-42752591 | regulatory region variant       | MODIFIER | -       | -                  | RegulatoryFeature | ENSMUSR00000145293 | promoter                | rs37395859  |
| 19:42758175-42758175 | intron variant                  | MODIFIER | Hps1    | ENSMUSG00000025188 | Transcript        | ENSMUST00000026194 | protein coding          | rs45819372  |
| 19:42758175-42758175 | 3 prime UTR variant             | MODIFIER | Hps1    | ENSMUSG00000025188 | Transcript        | ENSMUST00000069298 | protein coding          | rs45819372  |
| 19:42758175-42758175 | intron variant,non coding trans | MODIFIER | Hps1    | ENSMUSG00000025188 | Transcript        | ENSMUST00000159974 | retained intron         | rs45819372  |
| 19:42758175-42758175 | intron_variant                  | MODIFIER | Hps1    | ENSMUSG00000025188 | Transcript        | ENSMUST00000160455 | protein coding          | rs45819372  |
| 19:42758175-42758175 | downstream_gene_variant         | MODIFIER | Hps1    | ENSMUSG00000025188 | Transcript        | ENSMUST00000160621 | retained intron         | rs45819372  |
| 19:42758175-42758175 | upstream_gene_variant           | MODIFIER | Hps1    | ENSMUSG00000025188 | Transcript        | ENSMUST00000161252 | nonsense mediated decay | rs45819372  |
| 19:42758175-42758175 | intron variant                  | MODIFIER | Hps1    | ENSMUSG00000025188 | Transcript        | ENSMUST00000162004 | protein coding          | rs45819372  |
| 19:42758175-42758175 | downstream gene variant         | MODIFIER | Hps1    | ENSMUSG00000025188 | Transcript        | ENSMUST00000162061 | protein coding          | rs45819372  |
| 19:42758196-42758196 | intron variant                  | MODIFIER | Hps1    | ENSMUSG00000025188 | Transcript        | ENSMUST00000026194 | protein coding          | rs46320958  |
| 19:42758196-42758196 | 3_prime_UTR_variant             | MODIFIER | Hps1    | ENSMUSG00000025188 | Transcript        | ENSMUST00000069298 | protein coding          | rs46320958  |
| 19:42758196-42758196 | intron_variant,non coding trans | MODIFIER | Hps1    | ENSMUSG00000025188 | Transcript        | ENSMUST00000159974 | retained intron         | rs46320958  |
| 19:42758196-42758196 | intron_variant                  | MODIFIER | Hps1    | ENSMUSG00000025188 | Transcript        | ENSMUST00000160455 | protein coding          | rs46320958  |
| 19:42758196-42758196 | downstream gene variant         | MODIFIER | Hps1    | ENSMUSG00000025188 | Transcript        | ENSMUST00000160621 | retained intron         | rs46320958  |
| 19:42758196-42758196 | upstream gene variant           | MODIFIER | Hps1    | ENSMUSG00000025188 | Transcript        | ENSMUST00000161252 | nonsense mediated decay | rs46320958  |
| 19:42758196-42758196 | intron variant                  | MODIFIER | Hps1    | ENSMUSG00000025188 | Transcript        | ENSMUST00000162004 | protein coding          | rs46320958  |
| 19:42758196-42758196 | downstream gene variant         | MODIFIER | Hps1    | ENSMUSG00000025188 | Transcript        | ENSMUST00000162061 | protein coding          | rs46320958  |
| 19:42758663-42758663 | intron_variant                  | MODIFIER | Hps1    | ENSMUSG00000025188 | Transcript        | ENSMUST00000026194 | protein coding          | rs36543634  |
| 19:42758663-42758663 | 3_prime_UTR_variant             | MODIFIER | Hps1    | ENSMUSG00000025188 | Transcript        | ENSMUST00000069298 | protein coding          | rs36543634  |
| 19:42758663-42758663 | intron_variant,non coding trans | MODIFIER | Hps1    | ENSMUSG00000025188 | Transcript        | ENSMUST00000159974 | retained intron         | rs36543634  |
| 19:42758663-42758663 | intron variant                  | MODIFIER | Hps1    | ENSMUSG00000025188 | Transcript        | ENSMUST00000160455 | protein coding          | rs36543634  |
| 19:42758663-42758663 | downstream gene variant         | MODIFIER | Hps1    | ENSMUSG00000025188 | Transcript        | ENSMUST00000160621 | retained intron         | rs36543634  |
| 19:42758663-42758663 | upstream gene variant           | MODIFIER | Hps1    | ENSMUSG00000025188 | Transcript        | ENSMUST00000161252 | nonsense mediated decay | rs36543634  |
| 19:42758663-42758663 | intron_variant                  | MODIFIER | Hps1    | ENSMUSG00000025188 | Transcript        | ENSMUST00000162004 | protein coding          | rs36543634  |
| 19:42758663-42758663 | 3_prime_UTR_variant             | MODIFIER | Hps1    | ENSMUSG00000025188 | Transcript        | ENSMUST00000162061 | protein coding          | rs36543634  |
| 19:42759162-42759162 | intron_variant                  | MODIFIER | Hps1    | ENSMUSG00000025188 | Transcript        | ENSMUST00000026194 | protein coding          | rs36752388  |
| 19:42759162-42759162 | 3 prime UTR variant             | MODIFIER | Hps1    | ENSMUSG00000025188 | Transcript        | ENSMUST00000069298 | protein coding          | rs36752388  |
| 19:42759162-42759162 | intron variant,non coding trans | MODIFIER | Hps1    | ENSMUSG00000025188 | Transcript        | ENSMUST00000159974 | retained intron         | rs36752388  |
| 19:42759162-42759162 | intron variant                  | MODIFIER | Hps1    | ENSMUSG00000025188 | Transcript        | ENSMUST00000160455 | protein coding          | rs36752388  |
| 19:42759162-42759162 | downstream gene variant         | MODIFIER | Hps1    | ENSMUSG00000025188 | Transcript        | ENSMUST00000160621 | retained intron         | rs36752388  |
| 19:42759162-42759162 | upstream_gene_variant           | MODIFIER | Hps1    | ENSMUSG00000025188 | Transcript        | ENSMUST00000161252 | nonsense mediated decay | rs36752388  |
| 19:42759162-42759162 | intron_variant                  | MODIFIER | Hps1    | ENSMUSG00000025188 | Transcript        | ENSMUST00000162004 | protein coding          | rs36752388  |
| 19:42759162-42759162 | 3_prime_UTR_variant             | MODIFIER | Hps1    | ENSMUSG00000025188 | Transcript        | ENSMUST00000162061 | protein coding          | rs36752388  |
| 19:42759200-42759200 | intron variant                  | MODIFIER | Hps1    | ENSMUSG00000025188 | Transcript        | ENSMUST00000026194 | protein coding          | rs36373442  |
| 19:42759200-42759200 | synonymous variant              | LOW      | Hps1    | ENSMUSG00000025188 | Transcript        | ENSMUST00000069298 | protein coding          | rs36373442  |
| 19:42759200-42759200 | intron variant,non coding trans | MODIFIER | Hps1    | ENSMUSG00000025188 | Transcript        | ENSMUST00000159974 | retained intron         | rs36373442  |
| 19:42759200-42759200 | intron_variant                  | MODIFIER | Hps1    | ENSMUSG00000025188 | Transcript        | ENSMUST00000160455 | protein coding          | rs36373442  |
| 19:42759200-42759200 | downstream_gene_variant         | MODIFIER | Hps1    | ENSMUSG00000025188 | Transcript        | ENSMUST00000160621 | retained intron         | rs36373442  |
| 19:42759200-42759200 | upstream_gene_variant           | MODIFIER | Hps1    | ENSMUSG00000025188 | Transcript        | ENSMUST00000161252 | nonsense mediated decay | rs36373442  |
| 19:42759200-42759200 | intron variant                  | MODIFIER | Hps1    | ENSMUSG00000025188 | Transcript        | ENSMUST00000162004 | protein coding          | rs36373442  |
| 19:42759200-42759200 | synonymous variant              | LOW      | Hps1    | ENSMUSG00000025188 | Transcript        | ENSMUST00000162061 | protein coding          | rs36373442  |
| 19:42766725-42766728 | inframe deletion                | MODERATE | Hps1    | ENSMUSG00000025188 | Transcript        | ENSMUST00000026194 | protein coding          | rs241325659 |
| 19:42766725-42766728 | inframe deletion                | MODERATE | Hps1    | ENSMUSG00000025188 | Transcript        | ENSMUST00000069298 | protein coding          | rs241325659 |
| 19:42766725-42766728 | non_coding_transcript_exon_var  | MODIFIER | Hps1    | ENSMUSG00000025188 | Transcript        | ENSMUST00000159974 | retained intron         | rs241325659 |
| 19:42766725-42766728 | inframe_deletion                | MODERATE | Hps1    | ENSMUSG00000025188 | Transcript        | ENSMUST00000160455 | protein coding          | rs241325659 |
| 19:42766725-42766728 | upstream_gene_variant           | MODIFIER | Hps1    | ENSMUSG00000025188 | Transcript        | ENSMUST00000160621 | retained intron         | rs241325659 |

|                      |                                 |          |         |                    |                   |                    |                         |             |
|----------------------|---------------------------------|----------|---------|--------------------|-------------------|--------------------|-------------------------|-------------|
| 19:42766725-42766728 | downstream gene variant         | MODIFIER | Hps1    | ENSMUSG00000025188 | Transcript        | ENSMUST00000161761 | retained intron         | rs241325659 |
| 19:42766725-42766728 | inframe_deletion                | MODERATE | Hps1    | ENSMUSG00000025188 | Transcript        | ENSMUST00000162004 | protein_coding          | rs241325659 |
| 19:42766725-42766728 | inframe_deletion                | MODERATE | Hps1    | ENSMUSG00000025188 | Transcript        | ENSMUST00000162061 | protein_coding          | rs241325659 |
| 19:43505812-43505812 | intron_variant                  | MODIFIER | Got1    | ENSMUSG00000025190 | Transcript        | ENSMUST00000026196 | protein_coding          | rs30759675  |
| 19:43505812-43505812 | upstream gene variant           | MODIFIER | Got1    | ENSMUSG00000025190 | Transcript        | ENSMUST00000132504 | retained intron         | rs30759675  |
| 19:43505812-43505812 | intron variant,NMD transcript v | MODIFIER | Got1    | ENSMUSG00000025190 | Transcript        | ENSMUST00000133325 | nonsense mediated decay | rs30759675  |
| 19:43505812-43505812 | regulatory region variant       | MODIFIER | -       | -                  | RegulatoryFeature | ENSMUSR00000616731 | open chromatin region   | rs30759675  |
| 19:43836746-43836746 | synonymous_variant              | LOW      | Abcc2   | ENSMUSG00000025194 | Transcript        | ENSMUST00000026208 | protein_coding          | rs8238775   |
| 19:43836746-43836746 | upstream_gene_variant           | MODIFIER | Abcc2   | ENSMUSG00000025194 | Transcript        | ENSMUST00000099413 | protein_coding          | rs8238775   |
| 19:43838137-43838137 | 3_prime_UTR_variant             | MODIFIER | Abcc2   | ENSMUSG00000025194 | Transcript        | ENSMUST00000026208 | protein_coding          | rs37152801  |
| 19:43838137-43838137 | upstream gene variant           | MODIFIER | Abcc2   | ENSMUSG00000025194 | Transcript        | ENSMUST00000099413 | protein_coding          | rs37152801  |
| 19:44069465-44069465 | downstream gene variant         | MODIFIER | Chuk    | ENSMUSG00000025199 | Transcript        | ENSMUST00000026217 | protein_coding          | rs30359070  |
| 19:44069465-44069465 | intron variant                  | MODIFIER | Erlin1  | ENSMUSG00000025198 | Transcript        | ENSMUST00000071698 | protein_coding          | rs30359070  |
| 19:44069465-44069465 | intron variant                  | MODIFIER | Erlin1  | ENSMUSG00000025198 | Transcript        | ENSMUST00000112028 | protein_coding          | rs30359070  |
| 19:44069465-44069465 | downstream_gene_variant         | MODIFIER | Chuk    | ENSMUSG00000025199 | Transcript        | ENSMUST00000119591 | protein_coding          | rs30359070  |
| 19:44069465-44069465 | downstream_gene_variant         | MODIFIER | Chuk    | ENSMUSG00000025199 | Transcript        | ENSMUST00000149091 | retained_intron         | rs30359070  |
| 19:44069465-44069465 | intron variant,non_coding_trans | MODIFIER | Erlin1  | ENSMUSG00000025198 | Transcript        | ENSMUST00000168602 | retained_intron         | rs30359070  |
| 19:44069465-44069465 | intron variant                  | MODIFIER | Erlin1  | ENSMUSG00000025198 | Transcript        | ENSMUST00000169092 | protein_coding          | rs30359070  |
| 19:44069465-44069465 | non coding transcript exon var  | MODIFIER | Erlin1  | ENSMUSG00000025198 | Transcript        | ENSMUST00000170577 | retained intron         | rs30359070  |
| 19:44069465-44069465 | 5 prime UTR variant             | MODIFIER | Erlin1  | ENSMUSG00000025198 | Transcript        | ENSMUST00000170801 | protein_coding          | rs30359070  |
| 19:44069465-44069465 | upstream_gene_variant           | MODIFIER | Erlin1  | ENSMUSG00000025198 | Transcript        | ENSMUST00000171952 | nonsense mediated_decay | rs30359070  |
| 19:44069465-44069465 | intron variant                  | MODIFIER | Erlin1  | ENSMUSG00000025198 | Transcript        | ENSMUST00000172041 | protein_coding          | rs30359070  |
| 19:44069465-44069465 | upstream_gene_variant           | MODIFIER | Erlin1  | ENSMUSG00000025198 | Transcript        | ENSMUST00000172262 | protein_coding          | rs30359070  |
| 19:44069465-44069465 | regulatory region variant       | MODIFIER | -       | -                  | RegulatoryFeature | ENSMUSR00000145484 | promoter                | rs30359070  |
| 19:44079558-44079558 | intron variant                  | MODIFIER | Chuk    | ENSMUSG00000025199 | Transcript        | ENSMUST00000026217 | protein_coding          | rs30453151  |
| 19:44079558-44079558 | intron variant                  | MODIFIER | Chuk    | ENSMUSG00000025199 | Transcript        | ENSMUST00000119591 | protein_coding          | rs30453151  |
| 19:44079558-44079558 | upstream gene variant           | MODIFIER | Chuk    | ENSMUSG00000025199 | Transcript        | ENSMUST00000123806 | retained intron         | rs30453151  |
| 19:44079558-44079558 | intron_variant,non_coding_trans | MODIFIER | Chuk    | ENSMUSG00000025199 | Transcript        | ENSMUST00000134495 | retained_intron         | rs30453151  |
| 19:44079558-44079558 | upstream_gene_variant           | MODIFIER | Chuk    | ENSMUSG00000025199 | Transcript        | ENSMUST00000144286 | retained_intron         | rs30453151  |
| 19:44079558-44079558 | downstream_gene_variant         | MODIFIER | Chuk    | ENSMUSG00000025199 | Transcript        | ENSMUST00000147423 | retained_intron         | rs30453151  |
| 19:44079558-44079558 | upstream gene variant           | MODIFIER | Chuk    | ENSMUSG00000025199 | Transcript        | ENSMUST00000149091 | retained intron         | rs30453151  |
| 19:44109425-44109425 | upstream gene variant           | MODIFIER | Chuk    | ENSMUSG00000025199 | Transcript        | ENSMUST00000026217 | protein_coding          | rs215686473 |
| 19:44109425-44109425 | 3 prime UTR variant             | MODIFIER | Cwf19l1 | ENSMUSG00000025200 | Transcript        | ENSMUST00000026218 | protein_coding          | rs215686473 |
| 19:44109425-44109425 | downstream_gene_variant         | MODIFIER | Gm24336 | ENSMUSG00000077391 | Transcript        | ENSMUST00000104203 | snoRNA                  | rs215686473 |
| 19:44109425-44109425 | upstream_gene_variant           | MODIFIER | Chuk    | ENSMUSG00000025199 | Transcript        | ENSMUST00000119591 | protein_coding          | rs215686473 |
| 19:44109425-44109425 | upstream_gene_variant           | MODIFIER | Chuk    | ENSMUSG00000025199 | Transcript        | ENSMUST00000146861 | retained_intron         | rs215686473 |
| 19:44109425-44109425 | upstream gene variant           | MODIFIER | Chuk    | ENSMUSG00000025199 | Transcript        | ENSMUST00000147423 | retained intron         | rs215686473 |
| 19:45021411-45021411 | 5 prime UTR variant             | MODIFIER | Lzts2   | ENSMUSG00000035342 | Transcript        | ENSMUST00000039016 | protein_coding          | rs30420166  |
| 19:45021411-45021411 | 5 prime UTR variant             | MODIFIER | Lzts2   | ENSMUSG00000035342 | Transcript        | ENSMUST00000178087 | protein_coding          | rs30420166  |
| 19:45021411-45021411 | 5 prime UTR variant             | MODIFIER | Lzts2   | ENSMUSG00000035342 | Transcript        | ENSMUST00000179108 | protein_coding          | rs30420166  |
| 19:45055658-45055660 | 3_prime_UTR_variant             | MODIFIER | Sfxn3   | ENSMUSG00000025212 | Transcript        | ENSMUST00000062213 | protein_coding          | -           |
| 19:45055658-45055660 | 3_prime_UTR_variant             | MODIFIER | Sfxn3   | ENSMUSG00000025212 | Transcript        | ENSMUST00000084493 | protein_coding          | -           |
| 19:45055658-45055660 | 3_prime_UTR_variant             | MODIFIER | Sfxn3   | ENSMUSG00000025212 | Transcript        | ENSMUST00000111954 | protein_coding          | -           |
| 19:46360749-46360749 | downstream gene variant         | MODIFIER | Gm24610 | ENSMUSG00000065204 | Transcript        | ENSMUST00000083270 | snoRNA                  | rs30610370  |
| 19:46360749-46360749 | intron variant                  | MODIFIER | Mfsd13a | ENSMUSG00000025227 | Transcript        | ENSMUST00000086969 | protein_coding          | rs30610370  |
| 19:46360749-46360749 | intron variant                  | MODIFIER | Mfsd13a | ENSMUSG00000025227 | Transcript        | ENSMUST00000128041 | protein_coding          | rs30610370  |
| 19:46360749-46360749 | intron_variant                  | MODIFIER | Mfsd13a | ENSMUSG00000025227 | Transcript        | ENSMUST00000128455 | protein_coding          | rs30610370  |
| 19:46360749-46360749 | intron_variant,NMD_transcript_v | MODIFIER | Mfsd13a | ENSMUSG00000025227 | Transcript        | ENSMUST00000142994 | nonsense mediated_decay | rs30610370  |
| 19:46596493-46596493 | 3_prime_UTR_variant             | MODIFIER | Sfxn2   | ENSMUSG00000025036 | Transcript        | ENSMUST00000026011 | protein_coding          | rs13468955  |
| 19:46596493-46596493 | upstream gene variant           | MODIFIER | Wbp11   | ENSMUSG00000047731 | Transcript        | ENSMUST00000099376 | protein_coding          | rs13468955  |
| 19:46596493-46596493 | upstream gene variant           | MODIFIER | Wbp11   | ENSMUSG00000047731 | Transcript        | ENSMUST00000132202 | nonsense mediated decay | rs13468955  |
| 19:46596493-46596493 | upstream gene variant           | MODIFIER | Wbp11   | ENSMUSG00000047731 | Transcript        | ENSMUST00000138302 | protein_coding          | rs13468955  |
| 19:46596493-46596493 | upstream gene variant           | MODIFIER | Wbp11   | ENSMUSG00000047731 | Transcript        | ENSMUST00000175937 | processed transcript    | rs13468955  |
| 19:47113437-47113443 | inframe_deletion                | MODERATE | Pdcd11  | ENSMUSG00000025047 | Transcript        | ENSMUST00000072141 | protein_coding          | rs242270201 |
| 19:47113437-47113443 | intron_variant                  | MODIFIER | Calhm2  | ENSMUSG00000033033 | Transcript        | ENSMUST00000140512 | protein_coding          | rs242270201 |
| 19:47128794-47128794 | downstream_gene_variant         | MODIFIER | Calhm2  | ENSMUSG00000033033 | Transcript        | ENSMUST00000035822 | protein_coding          | rs30317883  |
| 19:47128794-47128794 | intron variant                  | MODIFIER | Pdcd11  | ENSMUSG00000025047 | Transcript        | ENSMUST00000072141 | protein_coding          | rs30317883  |
| 19:47128794-47128794 | intron variant                  | MODIFIER | Calhm2  | ENSMUSG00000033033 | Transcript        | ENSMUST00000140512 | protein_coding          | rs30317883  |
| 19:47129328-47129328 | downstream gene variant         | MODIFIER | Calhm2  | ENSMUSG00000033033 | Transcript        | ENSMUST00000035822 | protein_coding          | rs3709676   |
| 19:47129328-47129328 | intron variant                  | MODIFIER | Pdcd11  | ENSMUSG00000025047 | Transcript        | ENSMUST00000072141 | protein_coding          | rs3709676   |
| 19:47129328-47129328 | intron variant                  | MODIFIER | Calhm2  | ENSMUSG00000033033 | Transcript        | ENSMUST00000140512 | protein_coding          | rs3709676   |
| 19:47129339-47129339 | downstream_gene_variant         | MODIFIER | Calhm2  | ENSMUSG00000033033 | Transcript        | ENSMUST00000035822 | protein_coding          | rs3709692   |
| 19:47129339-47129339 | intron variant                  | MODIFIER | Pdcd11  | ENSMUSG00000025047 | Transcript        | ENSMUST00000072141 | protein_coding          | rs3709692   |
| 19:47129339-47129339 | intron variant                  | MODIFIER | Calhm2  | ENSMUSG00000033033 | Transcript        | ENSMUST00000140512 | protein_coding          | rs3709692   |
| 19:47860859-47860859 | intron variant,non coding_trans | MODIFIER | Cfap43  | ENSMUSG00000044948 | Transcript        | ENSMUST00000026048 | retained intron         | rs30658931  |
| 19:47860859-47860859 | intron variant                  | MODIFIER | Gsto1   | ENSMUSG00000025068 | Transcript        | ENSMUST00000026050 | protein_coding          | rs30658931  |
| 19:47860859-47860859 | upstream_gene_variant           | MODIFIER | Gsto2   | ENSMUSG00000025069 | Transcript        | ENSMUST00000056159 | protein_coding          | rs30658931  |
| 19:47860859-47860859 | upstream_gene_variant           | MODIFIER | Gsto2   | ENSMUSG00000025069 | Transcript        | ENSMUST00000120645 | protein_coding          | rs30658931  |
| 19:47860859-47860859 | upstream_gene_variant           | MODIFIER | Gsto1   | ENSMUSG00000025068 | Transcript        | ENSMUST00000143694 | retained_intron         | rs30658931  |

|                      |                                 |          |           |                    |                   |                    |                         |            |
|----------------------|---------------------------------|----------|-----------|--------------------|-------------------|--------------------|-------------------------|------------|
| 19:47862736-47862736 | intron variant,non coding trans | MODIFIER | Cfp43     | ENSMUSG00000044948 | Transcript        | ENSMUST00000026048 | retained intron         | rs30913462 |
| 19:47862736-47862736 | intron_variant                  | MODIFIER | Gsto1     | ENSMUSG00000025068 | Transcript        | ENSMUST00000026050 | protein_coding          | rs30913462 |
| 19:47862736-47862736 | upstream_gene_variant           | MODIFIER | Gsto2     | ENSMUSG00000025069 | Transcript        | ENSMUST00000056159 | protein_coding          | rs30913462 |
| 19:47862736-47862736 | upstream_gene_variant           | MODIFIER | Gsto2     | ENSMUSG00000025069 | Transcript        | ENSMUST00000120645 | protein_coding          | rs30913462 |
| 19:47862736-47862736 | upstream gene variant           | MODIFIER | Gsto1     | ENSMUSG00000025068 | Transcript        | ENSMUST00000143694 | retained intron         | rs30913462 |
| 19:53387469-53387469 | intron variant                  | MODIFIER | Smdc1     | ENSMUSG00000025024 | Transcript        | ENSMUST00000025997 | protein_coding          | rs31013803 |
| 19:57034895-57034895 | 3 prime UTR variant             | MODIFIER | Ablim1    | ENSMUSG00000025085 | Transcript        | ENSMUST00000079360 | protein_coding          | -          |
| 19:57034895-57034895 | 3_prime_UTR_variant             | MODIFIER | Ablim1    | ENSMUSG00000025085 | Transcript        | ENSMUST00000099294 | protein_coding          | -          |
| 19:57034895-57034895 | 3_prime_UTR_variant             | MODIFIER | Ablim1    | ENSMUSG00000025085 | Transcript        | ENSMUST00000104902 | protein_coding          | -          |
| 19:57034895-57034895 | downstream_gene_variant         | MODIFIER | Ablim1    | ENSMUSG00000025085 | Transcript        | ENSMUST00000111526 | protein_coding          | -          |
| 19:57034895-57034895 | downstream gene variant         | MODIFIER | Ablim1    | ENSMUSG00000025085 | Transcript        | ENSMUST00000111528 | protein_coding          | -          |
| 19:57034895-57034895 | 3 prime UTR variant             | MODIFIER | Ablim1    | ENSMUSG00000025085 | Transcript        | ENSMUST00000111529 | protein_coding          | -          |
| 19:57034895-57034895 | downstream gene variant         | MODIFIER | Ablim1    | ENSMUSG00000025085 | Transcript        | ENSMUST00000111544 | protein_coding          | -          |
| 19:57034895-57034895 | downstream gene variant         | MODIFIER | Ablim1    | ENSMUSG00000025085 | Transcript        | ENSMUST00000111546 | protein_coding          | -          |
| 19:57034895-57034895 | downstream_gene_variant         | MODIFIER | Ablim1    | ENSMUSG00000025085 | Transcript        | ENSMUST00000111550 | protein_coding          | -          |
| 19:57034895-57034895 | downstream_gene_variant         | MODIFIER | Ablim1    | ENSMUSG00000025085 | Transcript        | ENSMUST00000111555 | protein_coding          | -          |
| 19:57034895-57034895 | downstream_gene_variant         | MODIFIER | Ablim1    | ENSMUSG00000025085 | Transcript        | ENSMUST00000111558 | protein_coding          | -          |
| 19:57034895-57034895 | downstream gene variant         | MODIFIER | Ablim1    | ENSMUSG00000025085 | Transcript        | ENSMUST00000111559 | protein_coding          | -          |
| 19:57034895-57034895 | downstream gene variant         | MODIFIER | Ablim1    | ENSMUSG00000025085 | Transcript        | ENSMUST00000137389 | processed transcript    | -          |
| 19:57034895-57034895 | downstream gene variant         | MODIFIER | Ablim1    | ENSMUSG00000025085 | Transcript        | ENSMUST00000156316 | retained intron         | -          |
| 19:57034896-57034906 | 3_prime_UTR_variant             | MODIFIER | Ablim1    | ENSMUSG00000025085 | Transcript        | ENSMUST00000079360 | protein_coding          | -          |
| 19:57034896-57034906 | 3_prime_UTR_variant             | MODIFIER | Ablim1    | ENSMUSG00000025085 | Transcript        | ENSMUST00000099294 | protein_coding          | -          |
| 19:57034896-57034906 | 3_prime_UTR_variant             | MODIFIER | Ablim1    | ENSMUSG00000025085 | Transcript        | ENSMUST00000104902 | protein_coding          | -          |
| 19:57034896-57034906 | downstream gene variant         | MODIFIER | Ablim1    | ENSMUSG00000025085 | Transcript        | ENSMUST00000111526 | protein_coding          | -          |
| 19:57034896-57034906 | downstream gene variant         | MODIFIER | Ablim1    | ENSMUSG00000025085 | Transcript        | ENSMUST00000111528 | protein_coding          | -          |
| 19:57034896-57034906 | 3 prime UTR variant             | MODIFIER | Ablim1    | ENSMUSG00000025085 | Transcript        | ENSMUST00000111529 | protein_coding          | -          |
| 19:57034896-57034906 | downstream gene variant         | MODIFIER | Ablim1    | ENSMUSG00000025085 | Transcript        | ENSMUST00000111544 | protein_coding          | -          |
| 19:57034896-57034906 | downstream_gene_variant         | MODIFIER | Ablim1    | ENSMUSG00000025085 | Transcript        | ENSMUST00000111546 | protein_coding          | -          |
| 19:57034896-57034906 | downstream_gene_variant         | MODIFIER | Ablim1    | ENSMUSG00000025085 | Transcript        | ENSMUST00000111550 | protein_coding          | -          |
| 19:57034896-57034906 | downstream gene variant         | MODIFIER | Ablim1    | ENSMUSG00000025085 | Transcript        | ENSMUST00000111555 | protein_coding          | -          |
| 19:57034896-57034906 | downstream gene variant         | MODIFIER | Ablim1    | ENSMUSG00000025085 | Transcript        | ENSMUST00000111558 | protein_coding          | -          |
| 19:57034896-57034906 | downstream gene variant         | MODIFIER | Ablim1    | ENSMUSG00000025085 | Transcript        | ENSMUST00000111559 | protein_coding          | -          |
| 19:57034896-57034906 | downstream gene variant         | MODIFIER | Ablim1    | ENSMUSG00000025085 | Transcript        | ENSMUST00000137389 | processed transcript    | -          |
| 19:57034896-57034906 | downstream_gene_variant         | MODIFIER | Ablim1    | ENSMUSG00000025085 | Transcript        | ENSMUST00000156316 | retained intron         | -          |
| 19:59904597-59904597 | 3_prime_UTR_variant             | MODIFIER | Rab11fip2 | ENSMUSG00000040022 | Transcript        | ENSMUST00000051996 | protein_coding          | rs13463850 |
| 19:59904597-59904597 | upstream_gene_variant           | MODIFIER | Gm17203   | ENSMUSG00000090965 | Transcript        | ENSMUST00000164379 | lincRNA                 | rs13463850 |
| 19:59904597-59904597 | downstream gene variant         | MODIFIER | Rab11fip2 | ENSMUSG00000040022 | Transcript        | ENSMUST00000170819 | protein_coding          | rs13463850 |
| 19:59904597-59904597 | 3 prime UTR variant             | MODIFIER | Rab11fip2 | ENSMUSG00000040022 | Transcript        | ENSMUST00000171986 | protein_coding          | rs13463850 |
| 19:59904597-59904597 | regulatory region variant       | MODIFIER | -         | -                  | RegulatoryFeature | ENSMUSR00000619156 | enhancer                | rs13463850 |
| 19:60532827-60532827 | intron variant                  | MODIFIER | Cacul1    | ENSMUSG00000033417 | Transcript        | ENSMUST00000081790 | protein_coding          | rs48232195 |
| 19:60532827-60532827 | intron_variant                  | MODIFIER | Cacul1    | ENSMUSG00000033417 | Transcript        | ENSMUST00000111460 | protein_coding          | rs48232195 |
| 19:60532827-60532827 | intron_variant                  | MODIFIER | Cacul1    | ENSMUSG00000033417 | Transcript        | ENSMUST00000166712 | protein_coding          | rs48232195 |
| 19:60582908-60582908 | upstream_gene_variant           | MODIFIER | Cacul1    | ENSMUSG00000033417 | Transcript        | ENSMUST00000081790 | protein_coding          | rs30405708 |
| 19:60582908-60582908 | upstream gene variant           | MODIFIER | Cacul1    | ENSMUSG00000033417 | Transcript        | ENSMUST00000111460 | protein_coding          | rs30405708 |
| 19:60582908-60582908 | upstream gene variant           | MODIFIER | Cacul1    | ENSMUSG00000033417 | Transcript        | ENSMUST00000166712 | protein_coding          | rs30405708 |
| 19:60582908-60582908 | downstream gene variant         | MODIFIER | Gm25238   | ENSMUSG00000092655 | Transcript        | ENSMUST00000174914 | miRNA                   | rs30405708 |
| 19:60830708-60830708 | intron_variant                  | MODIFIER | Fam45a    | ENSMUSG00000024993 | Transcript        | ENSMUST00000025957 | protein_coding          | rs46518173 |
| 19:60830708-60830708 | intron_variant                  | MODIFIER | Fam45a    | ENSMUSG00000024993 | Transcript        | ENSMUST00000119633 | protein_coding          | rs46518173 |
| 19:60830708-60830708 | intron_variant                  | MODIFIER | Fam45a    | ENSMUSG00000024993 | Transcript        | ENSMUST00000128357 | protein_coding          | rs46518173 |
| 19:60830708-60830708 | non coding transcript exon var  | MODIFIER | Fam45a    | ENSMUSG00000024993 | Transcript        | ENSMUST00000142375 | retained intron         | rs46518173 |
| 19:60836073-60836073 | 3 prime UTR variant             | MODIFIER | Fam45a    | ENSMUSG00000024993 | Transcript        | ENSMUST00000025957 | protein_coding          | rs49879947 |
| 19:60836073-60836073 | downstream gene variant         | MODIFIER | Sfxn4     | ENSMUSG00000063698 | Transcript        | ENSMUST00000080806 | nonsense mediated decay | rs49879947 |
| 19:60836073-60836073 | 3 prime UTR variant             | MODIFIER | Fam45a    | ENSMUSG00000024993 | Transcript        | ENSMUST00000119633 | protein_coding          | rs49879947 |
| 19:60836073-60836073 | downstream_gene_variant         | MODIFIER | Sfxn4     | ENSMUSG00000063698 | Transcript        | ENSMUST00000124921 | nonsense mediated decay | rs49879947 |
| 19:60836073-60836073 | downstream_gene_variant         | MODIFIER | Sfxn4     | ENSMUSG00000063698 | Transcript        | ENSMUST00000135808 | protein_coding          | rs49879947 |
| 19:60836073-60836073 | downstream_gene_variant         | MODIFIER | Fam45a    | ENSMUSG00000024993 | Transcript        | ENSMUST00000142375 | retained intron         | rs49879947 |
| 19:60836074-60836074 | 3 prime UTR variant             | MODIFIER | Fam45a    | ENSMUSG00000024993 | Transcript        | ENSMUST00000025957 | protein_coding          | rs51979367 |
| 19:60836074-60836074 | downstream gene variant         | MODIFIER | Sfxn4     | ENSMUSG00000063698 | Transcript        | ENSMUST00000080806 | nonsense mediated decay | rs51979367 |
| 19:60836074-60836074 | 3 prime UTR variant             | MODIFIER | Fam45a    | ENSMUSG00000024993 | Transcript        | ENSMUST00000119633 | protein_coding          | rs51979367 |
| 19:60836074-60836074 | downstream_gene_variant         | MODIFIER | Sfxn4     | ENSMUSG00000063698 | Transcript        | ENSMUST00000124921 | nonsense mediated decay | rs51979367 |
| 19:60836074-60836074 | downstream_gene_variant         | MODIFIER | Sfxn4     | ENSMUSG00000063698 | Transcript        | ENSMUST00000135808 | protein_coding          | rs51979367 |
| 19:60836074-60836074 | downstream_gene_variant         | MODIFIER | Fam45a    | ENSMUSG00000024993 | Transcript        | ENSMUST00000142375 | retained intron         | rs51979367 |
| 19:60865590-60865590 | intron variant                  | MODIFIER | Prdx3     | ENSMUSG00000024997 | Transcript        | ENSMUST00000025961 | protein_coding          | rs30793214 |
| 19:60865590-60865590 | upstream gene variant           | MODIFIER | Sfxn4     | ENSMUSG00000063698 | Transcript        | ENSMUST00000080806 | nonsense mediated decay | rs30793214 |
| 19:60865590-60865590 | upstream gene variant           | MODIFIER | Sfxn4     | ENSMUSG00000063698 | Transcript        | ENSMUST00000124921 | nonsense mediated decay | rs30793214 |
| 19:60865590-60865590 | upstream gene variant           | MODIFIER | Sfxn4     | ENSMUSG00000063698 | Transcript        | ENSMUST00000135808 | protein_coding          | rs30793214 |
| 19:61126674-61126674 | intron_variant,NMD_transcript_v | MODIFIER | Zfp950    | ENSMUSG00000074733 | Transcript        | ENSMUST00000122927 | nonsense mediated decay | rs30353198 |
| 19:61126674-61126674 | intron_variant,NMD_transcript_v | MODIFIER | Zfp950    | ENSMUSG00000074733 | Transcript        | ENSMUST00000127117 | nonsense mediated decay | rs30353198 |
| 19:61126674-61126674 | intron_variant,NMD_transcript_v | MODIFIER | Zfp950    | ENSMUSG00000074733 | Transcript        | ENSMUST00000127290 | nonsense mediated decay | rs30353198 |

clal\_RF

|                          |                                 |          |            |                    |                   |                    |                              |             |
|--------------------------|---------------------------------|----------|------------|--------------------|-------------------|--------------------|------------------------------|-------------|
| 19:61126674-61126674     | 3 prime UTR variant             | MODIFIER | Zfp950     | ENSMUSG00000074733 | Transcript        | ENSMUST00000143264 | protein coding               | rs30353198  |
| 19:61126674-61126674     | downstream_gene_variant         | MODIFIER | Zfp950     | ENSMUSG00000074733 | Transcript        | ENSMUST00000148569 | protein_coding               | rs30353198  |
| 19:61126674-61126674     | intron_variant                  | MODIFIER | Zfp950     | ENSMUSG00000074733 | Transcript        | ENSMUST00000180544 | protein_coding               | rs30353198  |
| 19:61126674-61126674     | intron_variant,NMD_transcript_v | MODIFIER | Zfp950     | ENSMUSG00000074733 | Transcript        | ENSMUST00000205712 | nonsense_mediated_decay      | rs30353198  |
| 19:61126674-61126674     | intron variant                  | MODIFIER | Zfp950     | ENSMUSG00000074733 | Transcript        | ENSMUST00000205854 | protein coding               | rs30353198  |
| GL456221.1:113467-113467 | missense variant                | MODERATE | Csprs      | ENSMUSG00000062783 | Transcript        | ENSMUST00000078827 | protein coding               | -           |
| JH584304.1:48591-48591   | downstream gene variant         | MODIFIER | AC149090.1 | ENSMUSG00000095041 | Transcript        | ENSMUST00000178343 | protein coding               | -           |
| JH584304.1:48591-48591   | downstream_gene_variant         | MODIFIER | AC149090.1 | ENSMUSG00000095041 | Transcript        | ENSMUST00000179505 | protein_coding               | -           |
| X:152910095-152910095    | intron_variant,non_coding_trans | MODIFIER | Rpl7a-ps12 | ENSMUSG00000083440 | Transcript        | ENSMUST00000120384 | processed_pseudogene         | rs579355720 |
| X:152910095-152910095    | non_coding_transcript_exon_var  | MODIFIER | Gm6472     | ENSMUSG00000095597 | Transcript        | ENSMUST00000178147 | processed_transcript         | rs579355720 |
| X:152910095-152910095    | non coding transcript exon var  | MODIFIER | Gm6472     | ENSMUSG00000095597 | Transcript        | ENSMUST00000187973 | transcribed_processed_pseudo | rs579355720 |
| X:152910095-152910095    | regulatory region variant       | MODIFIER | -          | -                  | RegulatoryFeature | ENSMUSR00000291676 | promoter                     | rs579355720 |
| X:155504004-155504004    | downstream gene variant         | MODIFIER | Gm8606     | ENSMUSG00000083362 | Transcript        | ENSMUST00000121482 | processed_pseudogene         | -           |
| X:155504008-155504008    | downstream gene variant         | MODIFIER | Gm8606     | ENSMUSG00000083362 | Transcript        | ENSMUST00000121482 | processed_pseudogene         | -           |
| X:74988109-74988109      | downstream_gene_variant         | MODIFIER | Gab3       | ENSMUSG00000032750 | Transcript        | ENSMUST00000037374 | protein_coding               | -           |
| X:74988109-74988109      | downstream_gene_variant         | MODIFIER | Gab3       | ENSMUSG00000032750 | Transcript        | ENSMUST00000114104 | protein_coding               | -           |
| X:74988109-74988109      | intron_variant                  | MODIFIER | Gab3       | ENSMUSG00000032750 | Transcript        | ENSMUST00000114109 | protein_coding               | -           |
| X:74988109-74988109      | downstream gene variant         | MODIFIER | Gab3       | ENSMUSG00000032750 | Transcript        | ENSMUST00000129495 | processed transcript         | -           |
| Y:1016750-1016751        | intron variant                  | MODIFIER | Eif2s3y    | ENSMUSG00000069049 | Transcript        | ENSMUST00000091197 | protein coding               | -           |
| Y:1016750-1016751        | downstream gene variant         | MODIFIER | Eif2s3y    | ENSMUSG00000069049 | Transcript        | ENSMUST00000137006 | retained intron              | -           |
| Y:1016750-1016751        | downstream_gene_variant         | MODIFIER | Eif2s3y    | ENSMUSG00000069049 | Transcript        | ENSMUST00000139083 | processed_transcript         | -           |
| Y:1016750-1016751        | non_coding_transcript_exon_var  | MODIFIER | Eif2s3y    | ENSMUSG00000069049 | Transcript        | ENSMUST00000148961 | retained_intron              | -           |
| Y:1016750-1016751        | downstream_gene_variant         | MODIFIER | Eif2s3y    | ENSMUSG00000069049 | Transcript        | ENSMUST00000154556 | retained_intron              | -           |
| Y:4389605-4389607        | intergenic variant              | MODIFIER | -          | -                  | -                 | -                  | -                            | -           |
